# Supplementary material for: RNA Binding Proteins as Drivers and Therapeutic Target Candidates in Pancreatic Ductal Adenocarcinoma
Source: MDPI journal article supplement (doi:10.3390/ijms21114190), 2020-06-11
Supplement: s1 [file s1=3fversion=3d1591887408]

## Sheet: Tabelle1
gene_ID	gene	avg_CPM_pancreas	avg_CPM_PAAD	avg_CPM_PAAD_basal	avg_CPM_PAAD_classical	log2FC_panc_PAAD	FDR_panc_PAAD	log2FC_panc_basal	FDR_panc_basal	log2FC_panc_classical	FDR_panc_classical	log2FC_basal_classical	FDR_basal_classical	HR_PAAD	logrank_p_PAAD	HR_basal	logrank_p_basal	HR_classical	logrank_p_classical
ENSG00000001497	LAS1L	35.8976	28.6664	29.3903	26.9651	-0.324798	9.56637e-31	-0.288284	4.99618e-13	-0.41298	1.72822e-30	-0.124699	0.0520138	0.943973	0.782174	1.31125	0.415543	0.920304	0.780572
ENSG00000003756	RBM5	127.682	66.4908	64.6078	66.0197	-0.941279	6.28012e-146	-0.982782	6.48707e-74	-0.951534	4.16457e-86	0.0312494	1	0.560973	0.0058366	0.629124	0.166623	0.590568	0.0799649
ENSG00000004534	RBM6	182.231	58.8914	55.2138	60.5955	-1.62961	6.50519e-259	-1.72264	3.82181e-127	-1.58846	9.20692e-138	0.134176	0.323838	0.581559	0.00986202	0.599827	0.130705	0.571885	0.065591
ENSG00000005007	UPF1	112.523	107.357	99.9829	112.4	-0.067737	0.0356477	-0.170456	0.000126842	-0.0014463	1	0.169011	0.00932988	0.876261	0.526506	1.36379	0.350775	1.28221	0.403316
ENSG00000005075	POLR2J	17.9624	25.3154	22.2769	25.3978	0.494498	3.15383e-26	0.310537	1.66033e-06	0.499343	2.76833e-18	0.18881	0.0929501	0.858016	0.46227	1.37139	0.344394	0.901243	0.727215
ENSG00000005100	DHX33	22.9186	14.1147	13.0633	14.0565	-0.698949	3.91043e-113	-0.810173	9.02069e-76	-0.704968	6.41294e-72	0.105212	0.183081	0.826132	0.359956	1.15779	0.659978	0.869323	0.63837
ENSG00000005189	AC004381.6	2.98547	2.52043	2.38127	2.29396	-0.246459	2.66687e-05	-0.327986	7.11219e-05	-0.382064	2.1966e-07	-0.0540842	0.971966	0.780721	0.234085	NA	NA	NA	NA
ENSG00000005302	MSL3	17.5512	20.027	20.3642	19.7985	0.190232	1.21216e-09	0.214064	1.28469e-06	0.173704	1.7294e-05	-0.040362	0.871016	0.921827	0.696797	0.441582	0.015444	0.992534	0.979952
ENSG00000005436	GCFC2	16.6034	11.0011	10.5414	10.9351	-0.592986	4.35605e-90	-0.653733	1.03924e-53	-0.602361	2.28166e-56	0.0513781	0.708876	0.866611	0.492378	0.720086	0.323125	0.926222	0.797524
ENSG00000006047	YBX2	0.617224	1.05465	0.679517	0.608091	0.768321	7.75045e-08	0.139307	0.549167	-0.0169707	1	-0.156432	0.899453	0.987182	0.950678	1.24731	0.507137	0.709563	0.248544
ENSG00000006744	ELAC2	48.4491	39.3597	37.2211	37.4731	-0.299932	2.23795e-24	-0.380359	1.71962e-21	-0.37077	6.56382e-25	0.00959029	1	0.641132	0.0330832	1.00779	0.98142	0.696466	0.228173
ENSG00000007376	RPUSD1	16.2212	16.3257	15.6689	16.4657	0.0087787	0.926918	-0.0499823	0.569815	0.02131	0.836325	0.0712951	0.803509	0.904331	0.629552	1.03176	0.925388	1.15414	0.632455
ENSG00000007392	LUC7L	76.2078	32.9104	30.7392	34.2155	-1.21138	2.38656e-128	-1.30978	7.31705e-68	-1.15533	3.47203e-67	0.154457	0.271184	0.491097	0.000720513	0.439603	0.0168199	0.723043	0.280514
ENSG00000007520	TSR3	28.902	33.046	33.9498	32.062	0.192949	5.25733e-06	0.232271	0.000110612	0.149321	0.00758633	-0.0829518	0.644259	1.07684	0.722568	1.18346	0.612901	0.748586	0.330815
ENSG00000008988	RPS20	571.697	583.514	598.888	548.96	0.0294839	0.634654	0.0670353	0.425272	-0.0585827	0.449536	-0.125618	0.427119	1.36661	0.134058	1.53625	0.197078	0.967535	0.912047
ENSG00000009307	CSDE1	354.354	351.909	372.937	335.341	-0.00997881	0.877388	0.0737396	0.193312	-0.0795409	0.116845	-0.153281	0.0682948	1.12951	0.560419	0.752146	0.391243	0.759991	0.355907
ENSG00000011243	AKAP8L	57.9049	35.1316	33.2195	35.7276	-0.720999	4.31309e-85	-0.801698	8.95385e-50	-0.696722	3.25689e-47	0.104979	0.344839	0.563002	0.00616026	0.757524	0.409889	0.650907	0.151676
ENSG00000011260	UTP18	21.9509	23.2356	22.8379	22.7148	0.0817533	0.0289105	0.0570208	0.336072	0.0490367	0.359991	-0.00798452	1	0.935111	0.747596	1.7348	0.0962531	0.844423	0.570988
ENSG00000011304	PTBP1	159.321	177.982	176.818	179.79	0.159744	5.5114e-09	0.150298	0.000144598	0.174344	8.10642e-07	0.0240451	1	1.05424	0.80004	1.39569	0.315738	0.89665	0.715998
ENSG00000011376	LARS2	11.5745	14.0322	13.9982	13.4504	0.278355	1.36109e-15	0.274479	1.55716e-08	0.217644	1.01654e-06	-0.0568393	0.756251	1.08638	0.691032	0.84885	0.623137	1.1879	0.563964
ENSG00000012048	BRCA1	3.34662	7.65683	8.16705	7.22765	1.19225	1.26417e-110	1.28494	2.77946e-74	1.10934	1.1804e-64	-0.175625	0.240065	1.31208	0.195168	1.79892	0.0814557	0.862052	0.619027
ENSG00000013364	MVP	169.353	330.832	329.697	360.49	0.965992	1.96763e-59	0.961035	6.29879e-34	1.08985	8.13417e-52	0.128817	0.583533	1.22532	0.330804	0.972614	0.93371	1.60716	0.112551
ENSG00000013441	CLK1	150.885	68.587	70.752	70.005	-1.13742	5.50672e-120	-1.09262	6.75724e-52	-1.1079	7.73439e-66	-0.0152754	1	1.01938	0.926818	0.852667	0.634288	1.07412	0.810479
ENSG00000013523	ANGEL1	88.1788	24.865	21.1124	21.2351	-1.82617	1.48231e-245	-2.06202	2.5849e-176	-2.05377	1.14823e-219	0.00824501	1	0.562858	0.00613679	1.0144	0.965828	0.539704	0.0394877
ENSG00000014164	ZC3H3	19.1871	21.7564	22.3953	21.7317	0.180814	0.000222782	0.222613	0.00136789	0.179233	0.00487644	-0.0433816	0.995196	1.03878	0.855327	0.789304	0.477475	0.928116	0.802427
ENSG00000015479	MATR3	143.896	4.00803	4.04999	4.04043	-5.16379	0	-5.1496	0	-5.15227	0	-0.00264889	1	0	0	NA	NA	NA	NA
ENSG00000020577	SAMD4A	18.7348	20.9501	23.5211	18.3035	0.161148	0.0170045	0.328005	0.000330172	-0.0337324	0.810209	-0.361749	0.00790885	0.818156	0.336804	0.658108	0.212527	0.919825	0.779232
ENSG00000021776	AQR	26.8695	33.6215	33.3113	34.2975	0.323886	6.69771e-24	0.310378	6.00363e-12	0.352613	4.38499e-18	0.0422354	0.872825	1.34277	0.157583	0.838845	0.598157	1.62242	0.103345
ENSG00000023191	RNH1	96.695	121.499	124.01	122.166	0.329334	8.3179e-21	0.358885	2.95885e-13	0.337238	4.66935e-14	-0.021647	1	0.82276	0.352837	0.775048	0.449745	0.743437	0.319338
ENSG00000023734	STRAP	74.827	68.4322	73.9755	59.878	-0.128799	0.000964853	-0.0163862	0.883479	-0.321479	1.28768e-11	-0.305095	1.16813e-05	1.02561	0.903831	1.05612	0.870076	0.801301	0.456675
ENSG00000026297	RNASET2	40.0487	81.1398	75.0878	96.4162	1.01879	3.08252e-47	0.907004	8.37805e-23	1.26768	6.54538e-53	0.360677	0.0194126	1.17901	0.42914	0.968398	0.923724	1.17064	0.597631
ENSG00000029363	BCLAF1	110.584	68.0956	65.861	66.4379	-0.69917	1.08392e-116	-0.74733	9.42075e-65	-0.734732	3.0729e-77	0.0125986	1	0.832793	0.379666	0.860368	0.652051	0.684158	0.200389
ENSG00000029639	TFB1M	5.78239	5.92966	5.70388	6.06658	0.0342286	0.402128	-0.0207957	0.833088	0.0675607	0.185682	0.0883655	0.471683	0.874072	0.518398	1.05504	0.872472	0.496699	0.0179751
ENSG00000031698	SARS	168.467	100.923	102.299	96.7208	-0.739194	2.12988e-83	-0.719613	4.50101e-38	-0.800574	5.5527e-57	-0.0809614	0.582024	0.902933	0.624286	0.730944	0.348109	1.33693	0.334307
ENSG00000033030	ZCCHC8	24.4983	17.3947	16.3003	17.6483	-0.493663	7.79227e-69	-0.587807	4.57256e-48	-0.472656	3.71342e-39	0.115157	0.0878023	0.832257	0.377987	0.788652	0.477986	1.14927	0.642551
ENSG00000037241	RPL26L1	6.17012	9.98095	10.6478	9.27602	0.692946	1.63479e-86	0.786977	6.92648e-63	0.58653	1.78833e-41	-0.200465	0.00731881	1.07696	0.722349	1.36129	0.352903	0.845291	0.573335
ENSG00000037474	NSUN2	45.7645	48.6017	50.0645	46.9349	0.0867018	0.00725542	0.129514	0.00452931	0.0364963	0.455777	-0.0930187	0.306922	1.11467	0.602533	1.21628	0.556305	1.29995	0.380527
ENSG00000037897	METTL1	17.09	11.8471	12.444	11.2763	-0.529286	1.84558e-32	-0.4574	1.7038e-12	-0.601034	9.93538e-25	-0.143639	0.246728	1.00796	0.969673	0.769701	0.433847	0.850279	0.58612
ENSG00000038358	EDC4	68.1639	28.4985	28.6976	28.3044	-1.25773	0	-1.248	7.60568e-156	-1.26745	2.64675e-199	-0.0194496	1	0.596649	0.0136578	0.395328	0.00652602	0.568225	0.0577198
ENSG00000039123	SKIV2L2	42.5895	39.4006	36.884	40.3039	-0.111841	0.000695999	-0.207178	8.63594e-06	-0.0791953	0.0756262	0.127985	0.102393	1.27069	0.255029	1.43204	0.281751	1.69847	0.081322
ENSG00000040341	STAU2	16.1322	22.5791	23.2489	21.6673	0.485813	1.28087e-41	0.527835	1.24561e-26	0.426482	5.46408e-21	-0.101357	0.362881	1.33861	0.162938	1.24435	0.511742	1.05984	0.84577
ENSG00000041802	LSG1	31.5676	32.3814	32.7064	32.2951	0.0369512	0.33155	0.0514307	0.365317	0.0331446	0.549528	-0.0182866	1	1.47181	0.0662561	1.1156	0.743041	1.51244	0.170888
ENSG00000043514	TRIT1	26.0611	12.7913	12.7996	12.1501	-1.02677	3.92675e-165	-1.02545	2.21997e-78	-1.10119	2.08595e-110	-0.0757318	0.609749	1.06383	0.767094	1.71208	0.111426	0.876194	0.658027
ENSG00000046647	GEMIN8	14.1956	12.0593	10.966	12.446	-0.235785	1.07686e-10	-0.372341	5.93479e-13	-0.190115	5.62378e-05	0.182237	0.0208294	0.740685	0.149995	0.515641	0.0485004	1.08032	0.795531
ENSG00000047188	YTHDC2	37.6721	22.7869	21.8123	23.0801	-0.724449	1.37828e-107	-0.787731	3.01042e-60	-0.706084	1.61482e-60	0.0816515	0.460742	0.887919	0.568745	0.565931	0.0914642	1.11692	0.711191
ENSG00000047315	POLR2B	66.9154	64.7707	63.6365	62.2139	-0.0468111	0.185218	-0.0723676	0.15302	-0.104841	0.0151414	-0.0324731	0.952476	0.940661	0.769202	1.06301	0.85454	0.865597	0.628088
ENSG00000047410	TPR	86.9587	96.8972	96.4688	100.858	0.156172	1.45145e-06	0.149689	0.00121595	0.214008	1.52411e-07	0.0643187	0.629543	1.61294	0.0221597	1.16215	0.652313	1.05188	0.865307
ENSG00000048162	NOP16	6.97237	14.3987	14.1248	15.1015	1.04563	1.24378e-96	1.01824	6.74066e-52	1.11425	5.95533e-74	0.0960005	0.676597	1.18898	0.405995	0.878414	0.698922	0.884343	0.680037
ENSG00000048544	MRPS10	19.749	26.5712	28.3706	25.7646	0.428012	8.59421e-40	0.522663	2.96275e-32	0.383512	4.44473e-21	-0.139155	0.0716376	1.82966	0.00428699	2.19691	0.0181768	1.0654	0.833711
ENSG00000048740	CELF2	9.36678	22.5726	21.4284	21.7584	1.26842	2.41873e-50	1.19324	5.60454e-26	1.21539	1.16263e-31	0.0221376	1	0.636073	0.0305484	0.42265	0.0120099	0.638335	0.129792
ENSG00000048828	FAM120A	123.269	161.982	158.182	166.427	0.394056	2.87008e-30	0.359771	9.76957e-14	0.433138	2.4068e-23	0.0733675	0.601064	1.53893	0.0410328	1.56987	0.183401	1.07985	0.797834
ENSG00000048991	R3HDM1	17.5268	19.8591	20.3503	18.7191	0.180885	1.24562e-10	0.215973	2.46121e-08	0.0959185	0.00953327	-0.120059	0.061838	0.920048	0.689409	1.2361	0.524725	0.823069	0.513134
ENSG00000049883	PTCD2	2.70231	6.64812	6.75511	6.28329	1.29798	4.23586e-262	1.32092	1.93316e-159	1.21656	2.78988e-158	-0.104391	0.363197	0.619946	0.0217262	0.770949	0.436713	0.625271	0.112037
ENSG00000051596	THOC3	4.34678	5.59475	5.95978	5.45072	0.3635	9.31446e-12	0.455014	7.12578e-10	0.325866	1.79138e-06	-0.129168	0.483258	1.18367	0.419148	1.57793	0.168173	0.741678	0.314499
ENSG00000052749	RRP12	53.2746	32.7056	32.4287	30.8549	-0.704221	5.34365e-49	-0.716119	7.44166e-25	-0.788216	2.89321e-36	-0.0720978	0.801969	0.854053	0.449784	1.07357	0.831569	0.783633	0.415228
ENSG00000053372	MRTO4	32.211	26.7437	27.8654	25.3348	-0.268688	6.03626e-10	-0.20917	0.00107587	-0.34687	7.93893e-10	-0.137702	0.250546	1.34426	0.156013	1.2042	0.579042	1.09731	0.75682
ENSG00000054118	THRAP3	88.9499	94.6217	98.7125	91.2326	0.0892785	0.000210364	0.150239	6.32319e-06	0.0366918	0.290088	-0.113548	0.0301719	1.02191	0.91724	0.549697	0.0756488	0.905988	0.74348
ENSG00000055044	NOP58	51.4098	45.1711	47.3099	45.8931	-0.186728	5.15277e-06	-0.119892	0.0525812	-0.163866	0.00227324	-0.0439749	0.929051	1.20155	0.378898	0.727064	0.339917	0.852683	0.592673
ENSG00000055332	EIF2AK2	33.388	55.2358	58.5058	55.8622	0.726455	1.31681e-86	0.809311	4.99703e-61	0.742756	4.27468e-61	-0.0665569	0.70128	1.80045	0.00484246	1.67866	0.118361	1.1717	0.595529
ENSG00000055917	PUM2	94.6584	87.2275	86.942	87.0623	-0.117701	5.42034e-06	-0.122548	0.00123464	-0.120354	0.00039662	0.00219405	1	1.28089	0.235721	1.04143	0.903065	1.22358	0.500473
ENSG00000055950	MRPL43	33.452	36.9205	33.9763	37.8557	0.142104	4.6354e-05	0.0227464	0.765948	0.178276	4.91738e-05	0.155532	0.0471895	0.921843	0.696314	0.692275	0.270169	1.0921	0.768037
ENSG00000056097	ZFR	57.4561	56.9382	55.5595	54.0868	-0.0128397	0.771462	-0.0482663	0.33508	-0.0869015	0.0322352	-0.0386355	0.865026	0.929893	0.727342	1.2928	0.43979	0.766482	0.3711
ENSG00000056586	RC3H2	26.141	38.1151	39.7245	35.7992	0.544304	2.48394e-65	0.603672	2.29619e-44	0.45411	3.93586e-30	-0.149565	0.0400924	1.06969	0.7468	0.883708	0.710548	1.17307	0.5928
ENSG00000058673	ZC3H11A	135.311	100.647	99.8114	103.993	-0.426802	9.77188e-52	-0.438876	4.70289e-27	-0.379587	3.52976e-25	0.0592893	0.598051	1.18491	0.416264	1.29268	0.442789	1.01525	0.959594
ENSG00000058729	RIOK2	16.6449	14.5933	13.8047	14.4806	-0.18948	2.88684e-09	-0.269318	2.24245e-09	-0.20085	8.64769e-07	0.0684715	0.559745	0.772271	0.214922	1.14042	0.693236	0.836634	0.549231
ENSG00000059145	UNKL	20.3936	8.27877	8.46537	7.94412	-1.30001	8.5395e-165	-1.26808	6.89135e-72	-1.35937	3.90222e-101	-0.0912882	0.643959	0.752591	0.172311	0.892108	0.733428	0.796801	0.446164
ENSG00000059378	PARP12	30.2136	46.764	50.5431	47.8589	0.630189	2.19547e-46	0.742232	3.38724e-37	0.663668	1.99893e-35	-0.078566	0.700714	1.37592	0.125109	1.19207	0.597677	0.978758	0.942604
ENSG00000059588	TARBP1	54.8977	26.8186	24.418	29.4282	-1.03335	4.80109e-96	-1.16856	4.17184e-57	-0.899392	6.6022e-44	0.269172	0.00994836	0.81942	0.340546	0.799404	0.501565	0.577533	0.0654923
ENSG00000059691	GATB	7.80849	10.0334	10.0135	9.403	0.361284	5.36604e-25	0.359098	5.17496e-14	0.267225	1.02955e-09	-0.0918808	0.405789	0.970027	0.883988	1.05278	0.877356	1.16201	0.614981
ENSG00000060138	YBX3	322.357	134.617	164.456	122.515	-1.25982	5.51575e-66	-0.970964	4.94754e-20	-1.39575	7.6139e-47	-0.424783	0.00349632	1.55081	0.0340734	1.2263	0.540457	0.802199	0.459853
ENSG00000060339	CCAR1	55.3169	42.4034	41.1679	43.7954	-0.38302	9.08988e-46	-0.425844	1.08937e-27	-0.336492	8.75463e-22	0.0893533	0.230592	1.36877	0.132084	1.15733	0.661344	1.35269	0.31018
ENSG00000060688	SNRNP40	13.6113	20.145	20.4288	19.0713	0.565091	1.66769e-82	0.58533	2.33096e-49	0.48608	9.13899e-41	-0.0992549	0.209376	1.12969	0.558525	0.761478	0.415109	1.03262	0.914288
ENSG00000061794	MRPS35	22.4296	44.6405	40.3647	47.2086	0.992631	2.92039e-135	0.847431	8.748e-56	1.07332	9.2909e-108	0.225889	0.00987777	1.09892	0.652122	1.74042	0.0968797	1.05854	0.84898
ENSG00000061936	SFSWAP	56.9329	32.1625	30.8887	32.1358	-0.8239	1.219e-155	-0.882206	4.08123e-84	-0.825164	1.09229e-91	0.0570451	0.684015	0.805368	0.301158	0.884932	0.715344	1.02799	0.926378
ENSG00000062582	MRPS24	47.3445	5.68213	5.64293	5.169	-3.05874	2.51608e-258	-3.06824	2.7495e-109	-3.19501	3.81475e-147	-0.126763	0.779613	0.72489	0.123445	1.16897	0.63969	0.748343	0.33027
ENSG00000063046	EIF4B	445.647	235.51	225.72	229.93	-0.920102	2.14128e-119	-0.98134	4.44139e-64	-0.954713	2.77383e-75	0.0266271	1	0.85432	0.449829	1.12296	0.728176	0.776975	0.39713
ENSG00000063177	RPL18	829.656	548.021	491.17	544.654	-0.598311	7.03263e-28	-0.756289	1.64401e-21	-0.6072	1.02868e-17	0.149089	0.369676	0.899899	0.612813	1.13153	0.711105	0.930679	0.80959
ENSG00000063244	U2AF2	92.5381	110.567	108.986	108.832	0.256854	1.41762e-17	0.236047	2.96445e-08	0.23408	1.23634e-09	-0.00196778	1	0.796604	0.274888	1.25126	0.501066	0.855605	0.600653
ENSG00000064419	TNPO3	27.7696	44.6269	45.5094	43.9016	0.684162	3.29448e-89	0.712319	1.44692e-52	0.660702	6.46502e-54	-0.0516186	0.814571	1.50121	0.0555045	1.78066	0.0870482	1.00252	0.993353
ENSG00000064607	SUGP2	57.2711	32.2973	30.4313	30.4198	-0.826154	1.63336e-84	-0.912198	2.71655e-51	-0.912427	2.49711e-63	-0.000227179	1	0.64713	0.0391093	0.696136	0.281348	0.792404	0.439709
ENSG00000064703	DDX20	12.2038	9.65774	9.91239	9.27704	-0.336332	7.57137e-28	-0.298851	1.27352e-11	-0.394196	3.38061e-23	-0.0953492	0.272568	1.02563	0.903405	0.902084	0.758565	0.932407	0.814778
ENSG00000065150	IPO5	212.149	88.9737	90.4353	84.4463	-1.25366	1.90173e-215	-1.23009	9.21794e-96	-1.32901	9.24837e-137	-0.0989192	0.443268	1.16008	0.476389	2.00982	0.0372081	0.845321	0.573417
ENSG00000065183	WDR3	23.079	24.8155	29.0331	22.5331	0.104666	0.0623649	0.330967	5.39109e-06	-0.0344034	0.726204	-0.36538	0.000390224	1.72946	0.00855883	1.23109	0.532082	1.212	0.520946
ENSG00000065427	KARS	95.806	102.081	111.872	99.6301	0.0914294	0.0110713	0.223629	2.93068e-06	0.0563429	0.253481	-0.167287	0.0263872	1.29451	0.217184	1.71868	0.108829	0.909414	0.75056
ENSG00000065457	ADAT1	8.95721	14.279	15.4874	13.7706	0.673405	3.9248e-95	0.790191	3.10347e-74	0.621225	2.50068e-54	-0.168978	0.0168682	1.01618	0.938667	0.803829	0.51418	0.748724	0.330168
ENSG00000065526	SPEN	101.303	66.6684	67.8754	65.9283	-0.603398	3.39236e-64	-0.577689	1.50312e-28	-0.619407	8.98089e-40	-0.0417174	0.907807	1.12862	0.562314	0.848692	0.622205	1.29762	0.38191
ENSG00000065548	ZC3H15	46.9083	44.3397	45.0482	44.4004	-0.0810953	0.0110872	-0.0582242	0.249449	-0.0791258	0.0642921	-0.0209018	1	1.4932	0.056629	1.5213	0.211219	1.00422	0.988877
ENSG00000065978	YBX1	193.322	242.389	255.31	221.993	0.326302	1.26979e-14	0.401244	4.9538e-12	0.199486	0.000269157	-0.201759	0.0336466	1.33282	0.169328	1.2232	0.545512	1.11844	0.708928
ENSG00000066044	ELAVL1	40.633	53.3509	53.266	52.497	0.392583	1.22711e-70	0.390383	1.57017e-37	0.369315	2.08118e-40	-0.0210688	0.980971	0.990745	0.964442	1.00834	0.980145	1.11362	0.718064
ENSG00000066651	TRMT11	11.1744	9.19708	8.80431	9.96279	-0.280175	5.7829e-12	-0.343472	3.13251e-09	-0.165021	0.00196998	0.178464	0.0552336	1.16179	0.471702	1.09496	0.785753	0.825087	0.520954
ENSG00000066654	THUMPD1	43.4828	35.1882	33.8828	35.6977	-0.304889	7.8383e-27	-0.359514	2.09158e-18	-0.284214	1.53484e-14	0.0753016	0.41139	1.33326	0.167916	1.7956	0.0766996	0.929821	0.807192
ENSG00000067048	DDX3Y	38.287	17.8082	16.3879	17.2578	-1.10421	0.000119994	-1.22409	0.00671048	-1.14951	0.00381353	0.0745895	1	0.904236	0.630413	0.913236	0.785657	0.633711	0.1305
ENSG00000067248	DHX29	28.9521	26.9891	27.2072	26.0042	-0.100678	0.00113444	-0.0891947	0.0531265	-0.154268	9.53301e-05	-0.0650741	0.567093	0.859316	0.466714	1.04126	0.903451	0.848308	0.58076
ENSG00000067334	DNTTIP2	26.5262	41.541	43.9626	41.0625	0.646933	1.87985e-92	0.728672	4.22529e-65	0.630175	5.82191e-58	-0.0984999	0.284483	1.64846	0.0166669	1.02785	0.934317	1.69607	0.0790066
ENSG00000067533	RRP15	13.8042	14.7866	15.2752	14.7698	0.0993682	0.00876165	0.146519	0.0061323	0.0976553	0.0502053	-0.0488663	0.85438	1.59492	0.0250989	1.63032	0.141075	1.04617	0.879922
ENSG00000067596	DHX8	28.5808	44.0142	45.8352	43.2086	0.622841	1.32342e-109	0.681249	2.86721e-71	0.59627	4.41655e-65	-0.0849814	0.309184	1.40577	0.106036	1.55479	0.188131	1.1994	0.543907
ENSG00000067704	IARS2	60.5489	76.7821	77.3673	79.3162	0.342784	1.77395e-20	0.35372	6.09934e-12	0.389684	4.83286e-17	0.0359639	0.974139	1.72888	0.00913084	1.60899	0.155562	0.89412	0.707304
ENSG00000068394	GPKOW	11.332	19.4842	19.3671	19.337	0.78114	6.91318e-164	0.772881	1.15458e-87	0.770318	5.20904e-104	-0.00256635	1	0.937071	0.755219	1.16056	0.655277	1.03235	0.914963
ENSG00000068438	FTSJ1	29.5101	31.6873	37.0983	29.0928	0.102807	0.0162406	0.330347	1.55363e-09	-0.0203407	0.809768	-0.350695	2.52102e-06	1.20304	0.374661	1.27126	0.473198	1.70065	0.0733073
ENSG00000068784	SRBD1	14.5975	11.4784	11.0986	10.789	-0.346131	3.09794e-15	-0.394689	2.49619e-10	-0.435106	8.11219e-15	-0.0404177	0.977645	0.782012	0.237239	0.997109	0.99308	0.731071	0.292522
ENSG00000070047	PHRF1	46.5908	42.5043	42.4829	42.7014	-0.132333	0.000150159	-0.133133	0.00996312	-0.125531	0.0066714	0.00760202	1	0.760405	0.189278	0.599247	0.129962	0.932713	0.815273
ENSG00000070366	SMG6	29.4379	15.908	15.3402	14.6225	-0.887163	4.87834e-99	-0.940008	2.67972e-56	-1.00834	3.82752e-79	-0.0683324	0.729747	0.727942	0.127012	0.558495	0.0805418	0.808533	0.47521
ENSG00000070756	PABPC1	657.009	795.572	918.386	741.136	0.276072	1.10499e-08	0.483183	7.7555e-14	0.17382	0.00541076	-0.309363	0.00125496	1.3989	0.109901	1.57747	0.173819	1.06126	0.843807
ENSG00000070785	EIF2B3	14.6536	12.6672	13.2694	11.7287	-0.209959	1.18858e-08	-0.142414	0.00826923	-0.321375	7.6578e-12	-0.178968	0.0251168	1.01588	0.939828	0.983484	0.960213	1.11347	0.71841
ENSG00000070814	TCOF1	38.4022	39.4316	41.3195	37.258	0.0380745	0.271422	0.10561	0.0213808	-0.0436698	0.353558	-0.149282	0.0302268	0.991691	0.968087	1.8373	0.0676643	0.781057	0.408925
ENSG00000071082	RPL31	572.59	499.744	486.32	496.414	-0.196345	1.60759e-05	-0.235588	0.000386809	-0.20599	0.00057405	0.0295977	1	0.968103	0.876709	0.984716	0.963202	0.78559	0.422841
ENSG00000071626	DAZAP1	74.2303	74.7943	74.5358	76.5659	0.0106894	0.857584	0.00579514	1	0.0444985	0.421971	0.0387036	0.937002	0.854203	0.451046	0.906314	0.768167	0.656717	0.160459
ENSG00000071894	CPSF1	137.804	80.8369	79.7613	81.8422	-0.769524	1.19189e-51	-0.788844	8.13164e-26	-0.751671	5.35004e-29	0.0371733	1	0.671464	0.0554258	0.72486	0.335299	0.685659	0.203926
ENSG00000072364	AFF4	78.9094	85.4418	85.7383	83.053	0.114903	0.00862155	0.11983	0.0620246	0.074001	0.225707	-0.0458298	0.933219	1.20803	0.365045	1.0243	0.942939	1.29425	0.39146
ENSG00000072756	TRNT1	11.2021	11.0434	11.3848	11.0766	-0.0200837	0.61438	0.0236844	0.725207	-0.0157077	0.819001	-0.0393943	0.887751	1.34197	0.156954	1.02854	0.932825	1.06572	0.830959
ENSG00000072858	SIDT1	2.22609	8.55402	7.69701	8.89838	1.94004	7.09836e-114	1.78764	1.88755e-59	1.99704	1.0472e-86	0.209386	0.491959	1.21629	0.347057	0.668856	0.23628	0.960647	0.89311
ENSG00000073146	MOV10L1	0.432734	0.664861	0.63801	0.657593	0.617592	1.82043e-07	0.556534	0.000866514	0.601733	6.21207e-05	0.0451738	1	0.932918	0.739135	0.658017	0.212373	1.08297	0.790423
ENSG00000073792	IGF2BP2	10.8565	29.3325	34.8181	28.2013	1.43345	5.77751e-75	1.68071	6.98348e-64	1.37673	2.17217e-49	-0.303996	0.11792	1.72521	0.0088682	1.56386	0.182282	1.34163	0.323605
ENSG00000074071	MRPS34	50.6533	42.1491	40.9152	42.3504	-0.265364	1.85846e-07	-0.307958	3.45477e-05	-0.258479	0.000116862	0.0494808	0.969156	1.0715	0.740516	1.35979	0.355387	0.986667	0.9641
ENSG00000074266	EED	12.4389	12.8607	13.1855	13.0927	0.0483173	0.114052	0.0839743	0.0469887	0.0741572	0.0533337	-0.00981788	1	1.11465	0.602853	0.893204	0.734609	0.672165	0.179964
ENSG00000074356	NCBP3	36.9532	31.5793	29.7986	30.9313	-0.226396	5.5447e-14	-0.310181	1.74847e-13	-0.256286	1.44365e-11	0.053896	0.687997	0.654687	0.0438484	0.364266	0.00359973	0.933516	0.818582
ENSG00000075151	EIF4G3	37.1113	57.2583	58.2958	55.3768	0.625799	1.21707e-64	0.651556	4.26295e-38	0.577633	9.00643e-36	-0.0739247	0.643227	1.06394	0.76626	0.97071	0.928935	0.761832	0.363054
ENSG00000075292	ZNF638	81.8254	65.4951	64.3273	65.4296	-0.321077	5.68566e-38	-0.347098	4.83351e-22	-0.322571	2.23852e-23	0.0245278	0.969682	0.859202	0.466746	0.646115	0.189319	1.03773	0.901165
ENSG00000075856	SART3	33.8405	39.3657	38.2964	38.4965	0.218272	4.18904e-18	0.17831	4.00838e-07	0.186099	4.54783e-09	0.00778943	1	0.796276	0.274582	1.05356	0.875807	1.05353	0.861181
ENSG00000075914	EXOSC7	13.1486	22.2871	24.267	21.5362	0.760979	1.10475e-86	0.884105	3.96569e-66	0.711442	1.24573e-50	-0.172671	0.056728	1.2202	0.340102	0.961987	0.907579	0.959583	0.890177
ENSG00000075975	MKRN2	28.4896	18.8076	18.718	18.6548	-0.598284	3.42925e-80	-0.605419	1.37583e-39	-0.609834	3.12331e-49	-0.00441431	1	1.04766	0.823327	1.13249	0.70921	1.04733	0.876764
ENSG00000076043	REXO2	29.0039	34.8665	40.9066	31.4995	0.265462	1.40626e-10	0.495926	6.79542e-20	0.118999	0.0273648	-0.376934	4.6879e-07	1.53692	0.0389465	2.07929	0.0309996	1.09918	0.752511
ENSG00000076053	RBM7	15.9782	17.813	19.4687	17.0109	0.15636	8.061e-05	0.284396	1.48891e-07	0.0898582	0.0939253	-0.194545	0.0226478	1.31382	0.192981	1.58421	0.169759	0.908394	0.748679
ENSG00000076067	RBMS2	10.5916	43.2907	51.7552	40.1326	2.0302	0	2.28764	0	1.92081	0	-0.366844	3.0295e-06	1.50086	0.0519033	0.740086	0.365476	0.934479	0.821256
ENSG00000076108	BAZ2A	135.416	91.2895	93.7327	86.7547	-0.568794	2.19361e-57	-0.530741	7.46e-25	-0.642262	2.90109e-43	-0.111521	0.263648	1.15565	0.487858	1.06281	0.854975	1.53583	0.147903
ENSG00000076650	GPATCH1	9.17357	9.37881	8.81907	9.87305	0.0323122	0.364081	-0.0573324	0.2564	0.107585	0.00843126	0.164929	0.0127233	0.99321	0.973988	1.19774	0.590108	0.457273	0.00746622
ENSG00000076770	MBNL3	17.987	20.8082	18.0992	23.6523	0.210784	0.000102765	0.00965198	1	0.395595	1.87619e-09	0.385954	0.000221063	1.68925	0.0122614	1.13828	0.697411	1.27328	0.419498
ENSG00000076924	XAB2	57.2156	46.3706	43.9475	45.4961	-0.303508	3.10459e-15	-0.380727	4.67339e-12	-0.330896	2.41413e-11	0.0498326	0.865108	0.610213	0.0180216	0.927125	0.820654	0.699155	0.230404
ENSG00000077312	SNRPA	29.5153	41.213	41.787	41.84	0.481164	1.26252e-33	0.501294	1.05261e-19	0.50303	1.15113e-23	0.00173509	1	1.00067	0.997425	1.01016	0.975816	0.97548	0.933654
ENSG00000077348	EXOSC5	16.4658	13.2783	13.1522	13.2608	-0.31129	1.83058e-07	-0.324322	0.000232107	-0.312824	7.4787e-05	0.0115003	1	1.29604	0.214093	1.59046	0.166068	1.07478	0.80924
ENSG00000078328	RBFOX1	0.119813	0.113425	0.0668806	0.120312	-0.068441	0.788192	-0.792339	0.00209761	0.0245703	1	0.822706	0.0320057	1.10423	0.634599	1.46035	0.256061	0.670136	0.177486
ENSG00000078687	TNRC6C	11.9434	15.182	13.4319	14.8444	0.346721	1.09086e-14	0.170207	0.00766273	0.314217	1.11582e-08	0.144015	0.226379	0.589294	0.0115128	0.383585	0.00487688	0.773536	0.39073
ENSG00000079134	THOC1	23.0654	15.7194	15.3848	15.8848	-0.553294	7.73094e-55	-0.584371	1.34337e-29	-0.538262	4.48041e-31	0.0461133	0.872371	0.806405	0.303014	0.807945	0.524108	0.596458	0.0834099
ENSG00000079313	REXO1	32.5392	24.8195	23.9739	25.3057	-0.39082	2.83725e-26	-0.440896	1.84674e-16	-0.362713	4.84469e-14	0.0781861	0.591432	0.834048	0.385304	0.93336	0.837063	0.909907	0.751939
ENSG00000079785	DDX1	74.6989	64.4803	65.5861	62.9604	-0.212216	1.83157e-11	-0.187683	4.83258e-05	-0.246609	2.03804e-09	-0.0589259	0.67727	1.45431	0.0718838	0.967092	0.920034	1.21845	0.50694
ENSG00000080007	DDX43	1.71155	1.3522	1.32743	1.49675	-0.339578	0.0259369	-0.365368	0.121025	-0.193676	0.401372	0.171778	0.906546	1.03614	0.86529	0.802237	0.510351	0.71906	0.276249
ENSG00000080572	PIH1D3	0.00612739	0.027675	0.0460709	0.0110903	1.84333	2.12699e-11	2.50551	9.13983e-15	0.650243	0.0573114	-1.91252	0.000351698	0.689861	0.0767422	0.528134	0.0575382	0.816112	0.507955
ENSG00000080608	PUM3	21.6807	18.5949	20.2477	17.3062	-0.221599	3.76464e-07	-0.0986073	0.148796	-0.325033	6.89408e-09	-0.226432	0.0142677	1.32522	0.17638	1.10677	0.760765	0.673739	0.185189
ENSG00000080802	CNOT4	14.1396	15.5381	14.8021	15.1526	0.136581	1.50974e-07	0.0663034	0.0829113	0.101058	0.00212702	0.034756	0.841897	1.04739	0.82572	0.860077	0.651319	1.29119	0.395842
ENSG00000082153	BZW1	35.6457	82.4382	96.5474	74.0599	1.20946	6.69884e-176	1.43731	5.16029e-155	1.05489	6.792e-96	-0.382423	1.76812e-06	1.76202	0.00693584	1.43767	0.274231	1.30915	0.370669
ENSG00000082258	CCNT2	69.5105	29.2437	29.1607	29.9961	-1.24868	5.07071031398903e-313	-1.25297	8.32995e-144	-1.21202	3.06544e-168	0.0409496	0.885785	0.909691	0.650454	0.720654	0.326554	0.62803	0.122948
ENSG00000082515	MRPL22	13.0859	14.4246	14.0908	14.4529	0.140225	4.37832e-05	0.107283	0.0354037	0.14254	0.00129071	0.0352576	0.94322	0.908017	0.643485	1.11771	0.73836	1.07886	0.799031
ENSG00000082516	GEMIN5	14.5332	16.4355	17.0525	15.1169	0.177977	1.09165e-07	0.230967	4.31778e-07	0.0574254	0.223716	-0.173549	0.0129092	1.08968	0.681484	0.898735	0.748999	0.916213	0.769562
ENSG00000082898	XPO1	108.692	109.812	117.025	106.878	0.0147447	0.824487	0.106499	0.10344	-0.024299	0.77785	-0.130799	0.279619	1.41467	0.0952247	1.66611	0.126883	1.286	0.397725
ENSG00000083223	ZCCHC6	26.4651	28.2537	29.2927	28.2623	0.0944401	0.011291	0.146199	0.00515359	0.0951066	0.0522276	-0.0510937	0.826708	1.5235	0.0437306	0.692468	0.270536	1.47449	0.192742
ENSG00000083312	TNPO1	89.2972	78.423	77.5973	75.1435	-0.187142	9.44867e-08	-0.202482	5.94259e-05	-0.248744	3.16691e-08	-0.0462625	0.851692	1.05681	0.79142	1.50192	0.222065	0.913339	0.761073
ENSG00000083520	DIS3	25.6895	31.5362	32.1856	31.7899	0.295766	2.02668e-23	0.325058	3.7292e-15	0.307426	2.80257e-16	-0.0176331	1	1.6746	0.0142156	1.67723	0.121903	1.21102	0.528582
ENSG00000083544	TDRD3	20.3442	16.0945	15.6537	16.4146	-0.338389	1.05393e-23	-0.377854	9.15007e-15	-0.310007	1.71494e-12	0.0678507	0.625696	0.975585	0.905658	1.02625	0.938032	0.963691	0.901488
ENSG00000083635	NUFIP1	5.14048	5.82145	5.94541	5.76364	0.178578	2.34804e-08	0.210451	3.0891e-06	0.163948	6.86589e-05	-0.0465102	0.826708	0.881578	0.545356	1.06083	0.859589	0.640222	0.133921
ENSG00000083845	RPS5	908.281	399.646	367	391.032	-1.18446	6.00677e-104	-1.30735	1.63709e-58	-1.2159	9.42157e-64	0.0914534	0.731419	0.932649	0.738088	1.40033	0.31316	0.936942	0.827079
ENSG00000083896	YTHDC1	74.2419	55.642	54.2829	55.2565	-0.415774	6.11873e-70	-0.451544	6.957e-41	-0.425736	9.62673e-45	0.0258089	0.931162	0.888816	0.571766	0.618811	0.151746	0.986272	0.963029
ENSG00000084072	PPIE	41.0514	30.1291	30.1085	29.3084	-0.446285	6.77231e-22	-0.447185	3.92797e-11	-0.486127	1.32825e-15	-0.038942	1	0.802904	0.291585	0.63029	0.163047	0.851198	0.588624
ENSG00000084092	NOA1	45.0098	21.7273	21.7465	21.2476	-1.05092	3.37644e-116	-1.04942	1.02548e-53	-1.08311	2.54179e-70	-0.0336871	1	1.27237	0.249661	1.58747	0.167821	0.88401	0.67911
ENSG00000084623	EIF3I	107.7	120.889	121.962	120.192	0.166527	6.62688e-06	0.179355	0.000718939	0.158192	0.00101817	-0.0211636	1	1.22424	0.332919	0.917439	0.795952	1.23962	0.475793
ENSG00000085231	AK6	35.2669	11.035	10.4641	11.2267	-1.67629	0	-1.75185	0	-1.65214	0	0.0997218	0.191987	0.881392	0.544968	0.995035	0.988104	0.820148	0.506288
ENSG00000085760	MTIF2	34	21.7619	21.572	21.8682	-0.644037	2.55789e-75	-0.656425	1.71239e-37	-0.636868	1.86766e-43	0.0195599	1	1.53284	0.0413542	2.08109	0.0307932	1.15254	0.634424
ENSG00000085872	CHERP	28.3357	29.3582	28.8306	28.4611	0.0510431	0.127953	0.0245639	0.691905	0.00658897	0.986805	-0.0179754	1	0.843824	0.415856	1.02623	0.938172	0.894468	0.709933
ENSG00000086102	NFX1	44.617	32.0169	31.744	31.1131	-0.478823	2.38991e-42	-0.491345	4.16643e-22	-0.519888	6.12162e-30	-0.0285425	1	0.995161	0.981444	0.790157	0.479498	0.980095	0.946352
ENSG00000086189	DIMT1	22.6987	18.8127	19.2126	18.3847	-0.270777	9.8302e-19	-0.240234	6.24909e-08	-0.304341	2.23995e-14	-0.0641085	0.600666	0.847814	0.429727	1.0936	0.788624	0.695864	0.224251
ENSG00000086200	IPO11	11.5138	13.8637	14.2754	13.1783	0.26833	2.72457e-17	0.310609	1.44953e-12	0.195063	1.58451e-06	-0.115552	0.153591	1.06318	0.768913	1.1681	0.640789	0.821425	0.509642
ENSG00000086232	EIF2AK1	87.7301	120.817	113.676	121.513	0.461712	1.26417e-41	0.373858	3.25654e-15	0.470048	3.07888e-28	0.0961907	0.366825	1.20058	0.384077	2.14605	0.024159	1.37578	0.288465
ENSG00000086504	MRPL28	19.2627	37.4415	38.5358	35.9848	0.958031	9.19954e-132	0.999856	2.57795e-80	0.900721	5.75069e-77	-0.0991395	0.466287	0.872506	0.513132	1.51825	0.209851	0.747178	0.32766
ENSG00000086589	RBM22	28.502	35.2886	34.918	34.8397	0.307636	8.13677e-44	0.292536	1.87321e-21	0.289024	3.71346e-25	-0.00351171	1	0.770899	0.211224	0.656812	0.210348	0.846576	0.57833
ENSG00000087087	SRRT	101.367	71.4615	69.1814	72.3284	-0.504397	9.20457e-69	-0.551112	2.03826e-39	-0.486968	2.87549e-38	0.0641449	0.554658	0.573436	0.00780619	0.565944	0.0914782	0.787698	0.425244
ENSG00000087269	NOP14	42.1101	32.7416	32.5133	32.4199	-0.363249	3.3452e-23	-0.373208	2.35318e-12	-0.377506	3.12493e-15	-0.00429712	1	0.989355	0.959066	0.780714	0.459344	0.933909	0.818613
ENSG00000087365	SF3B2	160.489	166.75	174.962	160.961	0.0551937	0.0386877	0.124571	0.000621397	0.00423485	1	-0.120337	0.0339651	1.29116	0.220874	1.28897	0.447942	1.0701	0.821288
ENSG00000087995	METTL2A	7.34297	9.56409	9.62219	9.18633	0.380037	1.20128e-25	0.389138	1.0135e-14	0.322013	2.52732e-12	-0.0671319	0.688117	0.975373	0.905913	1.77902	0.0923307	0.583539	0.0675293
ENSG00000088038	CNOT3	46.7146	34.5186	34.4551	33.1877	-0.436384	1.65989e-46	-0.439173	1.01301e-23	-0.492913	7.15525e-36	-0.0537404	0.707848	0.76876	0.20604	1.38539	0.326713	0.634805	0.12504
ENSG00000088205	DDX18	47.6401	50.8071	53.2222	51.1842	0.0929936	0.0160393	0.159939	0.00274975	0.103677	0.0379579	-0.0562627	0.799219	1.47186	0.0652493	1.36677	0.349617	0.761277	0.359849
ENSG00000088247	KHSRP	92.6973	96.0931	90.9658	96.6887	0.0518198	0.061549	-0.0272648	0.573642	0.0607892	0.0899781	0.0880546	0.204428	0.899287	0.610857	0.771572	0.438146	0.972401	0.925671
ENSG00000088305	DNMT3B	15.1935	3.33677	3.49804	3.13745	-2.18688	4.58147e-281	-2.11871	3.03966e-115	-2.27528	4.9509e-163	-0.15658	0.387283	1.08973	0.680819	1.75285	0.0925586	0.729991	0.289275
ENSG00000088930	XRN2	67.604	64.3723	65.6437	62.6016	-0.0706958	0.103161	-0.0425393	0.577866	-0.11089	0.0482552	-0.0683514	0.740976	1.09019	0.679335	1.14187	0.690869	0.781351	0.407774
ENSG00000088986	DYNLL1	58.9551	123.813	124.264	122.079	1.07043	1.02745e-161	1.0757	1.49614e-91	1.05007	3.29662e-103	-0.0256291	1	0.785215	0.246845	0.899465	0.750475	1.04982	0.870743
ENSG00000089009	RPL6	697.424	395.661	387.736	371.071	-0.817815	3.70684e-88	-0.846958	2.5205e-46	-0.910418	3.34632e-65	-0.0634601	0.779939	0.670901	0.0554295	1.02569	0.939348	0.73699	0.305223
ENSG00000089048	ESF1	12.1272	12.757	12.9928	12.3905	0.0736516	0.0793971	0.0998695	0.0993555	0.031632	0.639354	-0.0682412	0.720559	1.04794	0.822323	0.772576	0.440459	0.841174	0.561447
ENSG00000089127	OAS1	3.43706	60.3365	63.8425	66.7683	4.13207	0	4.21341	6.57954e-298	4.2781	0	0.0646657	1	1.43365	0.0830552	1.04305	0.899535	0.977037	0.937906
ENSG00000089157	RPLP0	2377.37	966.079	894.47	981.101	-1.29917	2.35693e-142	-1.41026	1.08975e-75	-1.27691	8.66479e-79	0.13335	0.399602	1.0288	0.891702	1.28217	0.455405	1.17976	0.578914
ENSG00000089195	TRMT6	12.6915	13.0932	13.191	12.4999	0.0445381	0.257016	0.0557141	0.343516	-0.022175	0.746526	-0.0778929	0.552758	0.915461	0.671828	1.14359	0.687084	1.0607	0.844246
ENSG00000089280	FUS	101.641	175.376	177.611	174.505	0.786909	1.55452e-133	0.805197	3.09728e-76	0.779725	3.78393e-85	-0.0254728	1	0.922705	0.701261	0.636323	0.18236	1.19897	0.542303
ENSG00000089682	RBM41	8.89032	7.8426	7.74609	8.48346	-0.179564	6.1629e-05	-0.197898	0.00203066	-0.0661979	0.301205	0.131711	0.293411	1.47864	0.0605782	1.16922	0.63924	1.39596	0.261104
ENSG00000089737	DDX24	84.8389	125.008	119.819	115.931	0.559199	4.42904e-56	0.498034	1.10984e-26	0.450423	3.28288e-26	-0.0476123	0.839496	0.737504	0.145057	0.89189	0.732878	0.880643	0.670358
ENSG00000089876	DHX32	34.3564	33.4133	35.316	33.21	-0.0399116	0.387313	0.0400662	0.589235	-0.0485523	0.438752	-0.0886201	0.547959	1.84142	0.00370075	1.51377	0.216748	1.38512	0.282199
ENSG00000090060	PAPOLA	147.425	117.275	112.88	113.589	-0.329951	2.06702e-31	-0.385091	4.35524e-22	-0.375979	1.05208e-25	0.00911225	1	0.924709	0.707357	1.13534	0.703167	0.71216	0.252728
ENSG00000090097	PCBP4	24.5186	26.3674	25.7829	25.7161	0.104634	0.0340027	0.0724153	0.357203	0.0686285	0.325457	-0.003787	1	0.87019	0.504538	0.781034	0.457996	1.13561	0.671435
ENSG00000090263	MRPS33	21.3441	20.149	18.6473	18.7607	-0.0834322	0.0649457	-0.194538	0.00107919	-0.186452	0.0004891	0.00808754	1	0.939444	0.764461	1.84559	0.0686662	0.97147	0.922676
ENSG00000090470	PDCD7	15.4383	13.3834	13.3026	13.2145	-0.205351	6.9731e-13	-0.21424	2.12211e-07	-0.223763	1.62423e-09	-0.00952209	1	0.966413	0.86997	0.767798	0.429487	0.73902	0.309636
ENSG00000090621	PABPC4	513.236	115.74	117.951	110.837	-2.14877	8.33673525085728e-318	-2.12142	2.59679e-134	-2.21124	8.25456e-181	-0.0898216	0.741317	1.22512	0.331192	1.55864	0.185629	0.741837	0.31485
ENSG00000090861	AARS	142.174	106.286	110.904	100.258	-0.419602	2.80002e-22	-0.358196	1.19291e-08	-0.50381	4.51915e-19	-0.145615	0.207256	0.901798	0.620021	1.15223	0.670977	0.602887	0.0869686
ENSG00000090905	TNRC6A	97.3206	39.4022	39.3107	38.2631	-1.30397	0	-1.30748	9.72844e-177	-1.34626	7.34035e-232	-0.038777	0.875957	0.576018	0.00809871	0.626953	0.163427	0.65695	0.158299
ENSG00000091009	RBM27	17.1879	16.933	16.9175	16.7906	-0.0208358	0.575119	-0.0222663	0.738412	-0.0330753	0.50322	-0.0108093	1	1.16235	0.471867	1.6213	0.143861	0.776697	0.395521
ENSG00000091127	PUS7	12.2373	10.5053	11.3254	9.73062	-0.219836	2.23327e-07	-0.111374	0.0877775	-0.330027	1.4268e-09	-0.218665	0.0153434	1.19268	0.399265	2.01362	0.0366771	0.739059	0.308763
ENSG00000091542	ALKBH5	58.8119	67.0103	61.4687	59.9386	0.188377	3.1737e-07	0.0639117	0.211671	0.0275041	0.61784	-0.036408	0.916383	0.570119	0.00741398	0.549189	0.0751847	0.535956	0.0372439
ENSG00000091732	ZC3HC1	8.07107	9.98931	9.84432	9.40867	0.306126	1.81412e-23	0.285635	6.27418e-12	0.21965	7.59844e-09	-0.0659915	0.559152	0.802405	0.290558	0.890147	0.726863	0.782734	0.410235
ENSG00000092199	HNRNPC	190.11	226.827	240.028	221.719	0.254739	1.55778e-20	0.336352	6.88423e-19	0.221868	2.12529e-10	-0.114485	0.0830825	1.7262	0.00879549	1.60319	0.155517	1.34406	0.322549
ENSG00000092208	GEMIN2	3.75517	5.05826	5.29659	4.87386	0.42706	2.32152e-43	0.493791	1.9115e-31	0.373024	8.73331e-22	-0.120788	0.11543	1.12594	0.569301	1.18484	0.611004	0.952602	0.870896
ENSG00000092345	DAZL	0.0133096	0.129087	0.112996	0.109042	3.10225	4.4544e-39	2.89589	1.82373e-24	2.85202	1.5395e-26	-0.0492526	1	0.725073	0.128889	0.551052	0.0768964	0.569276	0.0633579
ENSG00000092847	AGO1	36.639	26.0067	26.1384	24.7809	-0.494069	1.52388e-61	-0.486959	3.51621e-30	-0.563592	1.6427e-48	-0.0766341	0.420759	1.01988	0.924861	0.601805	0.12593	1.10628	0.735246
ENSG00000093167	LRRFIP2	28.8487	34.5454	34.6362	34.5939	0.259903	1.8876e-15	0.263446	1.16451e-08	0.262024	3.71557e-10	-0.00142303	1	1.30604	0.199461	0.935345	0.841046	1.61251	0.106475
ENSG00000095485	CWF19L1	14.5807	14.9736	15.0173	14.5066	0.0378298	0.286348	0.0429368	0.439306	-0.00803701	0.97379	-0.0509761	0.776225	0.872534	0.514427	0.74825	0.385559	0.961005	0.894515
ENSG00000095627	TDRD1	1.04824	0.940019	0.845643	1.07896	-0.156071	0.391594	-0.308914	0.24807	0.0433589	0.935491	0.352513	0.5526	1.14447	0.518112	1.45226	0.263182	0.694434	0.221604
ENSG00000096080	MRPS18A	8.05145	12.5458	11.9903	13.1957	0.639439	2.05496e-78	0.574694	7.04319e-35	0.712118	3.03347e-64	0.137428	0.103068	1.27198	0.251525	1.01024	0.97561	1.14719	0.646888
ENSG00000096401	CDC5L	28.8619	34.8654	34.747	34.0843	0.272759	5.30641e-19	0.267713	4.91801e-10	0.240165	8.61143e-10	-0.0275491	0.996222	1.36239	0.138833	1.46119	0.255333	1.11194	0.721864
ENSG00000096746	HNRNPH3	100.499	78.9909	79.7808	78.5712	-0.347233	5.65681e-40	-0.332917	2.59888e-18	-0.354978	5.04037e-25	-0.0220616	1	0.888346	0.572236	0.986496	0.967515	0.843244	0.569343
ENSG00000099381	SETD1A	39.5087	29.3135	29.875	28.5028	-0.430642	9.65728e-64	-0.403178	6.42596e-28	-0.470906	1.35944e-45	-0.0677288	0.405789	0.980209	0.923627	0.872874	0.683586	1.06083	0.843322
ENSG00000099622	CIRBP	592.571	212.769	177.15	189.897	-1.47772	1.00523e-145	-1.74201	6.40629e-106	-1.64182	2.63239e-119	0.100194	0.641831	0.487002	0.000618965	0.675562	0.239254	0.493223	0.0204973
ENSG00000099783	HNRNPM	126.12	131.593	129.056	129.546	0.0612153	0.0434553	0.033177	0.527299	0.0386062	0.376664	0.0054292	1	0.698566	0.0863726	0.583632	0.1109	0.885676	0.684343
ENSG00000099817	POLR2E	55.9428	78.8763	77.6653	76.1203	0.495457	2.49357e-50	0.473219	3.04147e-25	0.444174	1.11795e-26	-0.0290464	1	0.756715	0.180248	0.997143	0.993152	0.954975	0.877216
ENSG00000099821	POLRMT	44.9846	35.6611	32.3895	35.0712	-0.335414	1.4423e-14	-0.473966	1.65514e-14	-0.35929	9.63688e-11	0.114679	0.39071	0.701181	0.0888899	1.10007	0.774705	0.816329	0.498012
ENSG00000099899	TRMT2A	37.4759	24.1805	23.6311	23.9914	-0.632436	6.49143e-64	-0.665251	5.61779e-34	-0.643652	3.65162e-39	0.0216008	1	0.627675	0.0247503	0.801303	0.50811	0.725685	0.280231
ENSG00000099995	SF3A1	92.8138	85.904	84.7303	82.4281	-0.111599	0.00104205	-0.131506	0.00737489	-0.171129	7.45984e-05	-0.0396233	0.896334	1.00855	0.967478	0.930166	0.828033	0.691009	0.2126
ENSG00000100028	SNRPD3	29.1121	59.524	59.7617	58.7536	1.03167	3.84902e-222	1.03759	1.11483e-125	1.01287	6.62202e-142	-0.0247203	1	1.26546	0.258761	1.21027	0.56697	1.03672	0.903751
ENSG00000100029	PES1	57.3587	60.3497	61.3931	57.1997	0.0730262	0.0879041	0.0979568	0.113624	-0.00428661	1	-0.102245	0.435657	1.14207	0.524655	1.6914	0.115817	0.965184	0.905591
ENSG00000100038	TOP3B	20.793	0.366847	0.357713	0.369468	-5.80197	0	-5.84398	0	-5.78937	0	0.0549493	0.981345	1.23381	0.313195	1.39119	0.322748	1.11792	0.708411
ENSG00000100056	DGCR14	11.4057	13.7291	13.6397	13.1632	0.266204	6.82707e-16	0.257089	2.14522e-08	0.205722	9.55045e-07	-0.0513709	0.788629	0.688289	0.0726416	0.811486	0.530768	0.899914	0.723499
ENSG00000100101	RP1-37E16.12	16.0361	0.0249516	0.0196296	0.0242981	-9.31631	0	-9.49905	0	-9.25994	0	0.249291	0.593828	0.89882	0.609113	0.420421	0.00893486	0.933976	0.8188
ENSG00000100109	TFIP11	18.0544	20.5009	21.3162	19.7666	0.183588	5.19147e-09	0.239468	4.69688e-08	0.131228	0.00143168	-0.108244	0.188066	1.14272	0.523573	0.912033	0.78229	0.644044	0.137705
ENSG00000100129	EIF3L	474.359	94.9245	95.4482	88.7404	-2.32108	0	-2.31312	8.6207e-235	-2.41826	3.62945564091438e-318	-0.105143	0.474702	1.06554	0.760798	1.43062	0.283094	0.825819	0.521227
ENSG00000100138	SNU13	57.1655	81.1015	79.7722	76.7193	0.504414	1.77603e-46	0.48067	9.49478e-24	0.424275	2.81882e-22	-0.0563962	0.774399	0.983519	0.936538	1.65943	0.126959	0.890198	0.696357
ENSG00000100142	POLR2F	15.284	0.204743	0.234753	0.185957	-6.21373	0	-6.00454	0	-6.35743	0	-0.353536	0.00442832	0.977545	0.913451	1.15516	0.665442	0.693854	0.227112
ENSG00000100201	DDX17	761.904	345.713	335.422	355.798	-1.14001	2.0211e-306	-1.18362	8.26301e-150	-1.09852	3.12056e-162	0.085096	0.353391	0.880599	0.544117	0.606062	0.138845	0.939705	0.834783
ENSG00000100220	RTCB	51.3194	60.2755	57.5773	59.6389	0.231975	9.37399e-10	0.165979	0.00247433	0.216683	7.78011e-06	0.050705	0.855544	1.2407	0.305711	1.88283	0.0570186	0.877625	0.665155
ENSG00000100226	GTPBP1	37.4553	56.2573	55.6425	58.0967	0.586903	2.4675e-67	0.570943	1.27096e-34	0.633413	5.93756e-51	0.0624698	0.70128	1.11624	0.598082	1.19268	0.596604	0.961326	0.894979
ENSG00000100227	POLDIP3	66.0427	62.8307	64.6412	59.9369	-0.0721027	0.0137742	-0.0311799	0.544659	-0.140056	0.0001419	-0.108877	0.112413	0.970141	0.884408	0.726891	0.3373	0.956487	0.881633
ENSG00000100296	THOC5	21.3902	17.1887	18.1431	16.0163	-0.316507	3.35603e-20	-0.23822	1.39189e-06	-0.418442	2.56861e-21	-0.180228	0.0138302	0.999643	0.998633	0.765411	0.421873	0.702058	0.233113
ENSG00000100298	APOBEC3H	0.162416	0.550636	0.598232	0.539429	1.73256	5.97043e-55	1.84955	6.55421e-38	1.70148	4.80826e-37	-0.148608	0.853743	1.00819	0.96893	0.704676	0.298034	1.22441	0.49646
ENSG00000100316	RPL3	2930.56	1562.21	1433.48	1526.57	-0.907596	1.54044e-79	-1.03165	4.92146e-49	-0.940898	3.30018e-51	0.0907511	0.654494	0.815962	0.328636	0.977846	0.946413	1.01361	0.963911
ENSG00000100319	ZMAT5	6.14482	7.51103	7.34202	7.27252	0.287253	2.11644e-15	0.255514	4.83664e-07	0.240844	1.61332e-07	-0.014674	1	0.976863	0.910632	0.837612	0.59452	0.801627	0.457507
ENSG00000100320	RBFOX2	51.711	69.0433	76.1089	63.0111	0.417075	3.65522e-37	0.557486	3.15435e-37	0.285244	2.98911e-12	-0.272245	1.15479e-05	1.31022	0.195379	1.23321	0.529323	1.22305	0.50745
ENSG00000100353	EIF3D	270.53	149.442	152.217	144.822	-0.856289	1.37698e-88	-0.829666	2.15835e-39	-0.901594	1.70939e-56	-0.0719279	0.743081	1.52374	0.045091	1.89777	0.0566253	0.836844	0.550585
ENSG00000100354	TNRC6B	35.8778	27.7751	27.7673	26.373	-0.368743	3.69385e-26	-0.369505	1.25426e-13	-0.443248	5.01226e-23	-0.0737441	0.575962	0.932826	0.739253	1.03602	0.915441	1.26187	0.448347
ENSG00000100403	ZC3H7B	101.302	80.4569	81.9989	73.7235	-0.332302	1.31581e-25	-0.305014	5.38551e-12	-0.458309	1.34364e-30	-0.153296	0.0234939	0.654379	0.0416609	0.532001	0.0576984	0.656614	0.156133
ENSG00000100410	PHF5A	14.1483	16.3806	17.0913	16.0154	0.211027	1.93819e-09	0.272469	2.83599e-08	0.178487	8.54773e-05	-0.0939866	0.395387	1.68866	0.0131098	1.41171	0.299301	1.32969	0.347425
ENSG00000100416	TRMU	25.523	17.9669	16.3329	17.6764	-0.506587	4.37492e-26	-0.64381	8.59999e-21	-0.529978	7.9371e-18	0.113837	0.482221	0.534824	0.00266415	0.629829	0.167669	0.714993	0.261214
ENSG00000100441	KHNYN	75.3207	48.5773	47.8239	48.1354	-0.632541	6.41539e-80	-0.655331	4.77738e-41	-0.645547	5.07873e-49	0.0097849	1	0.956187	0.8299	0.828584	0.574494	1.04591	0.881063
ENSG00000100461	RBM23	43.6024	48.5338	44.8837	45.1373	0.154715	1.77324e-06	0.0418734	0.398862	0.0501899	0.232514	0.00831656	1	0.592853	0.0121961	0.67167	0.235998	0.913395	0.761687
ENSG00000100601	ALKBH1	6.32925	7.90337	7.34334	7.73654	0.319822	9.74712e-26	0.212995	2.86505e-07	0.289442	6.26227e-15	0.0764513	0.431076	0.588093	0.0106505	0.701296	0.287581	0.73134	0.293093
ENSG00000100603	SNW1	37.6437	45.0459	46.1979	43.87	0.258843	1.68541e-23	0.295201	3.68476e-16	0.220717	3.01963e-11	-0.074486	0.347607	1.11905	0.590174	1.33864	0.382868	1.11889	0.706809
ENSG00000100650	SRSF5	268.801	135.476	130.448	135.948	-0.988447	1.07511e-157	-1.04302	5.56628e-81	-0.983442	5.8527e-90	0.0595809	0.765604	0.639905	0.0342489	0.476204	0.0287055	0.938134	0.832396
ENSG00000100664	EIF5	151.461	124.924	116.698	120.416	-0.27786	5.27647e-15	-0.37615	3.06303e-14	-0.330881	1.11489e-13	0.0452692	0.862355	0.836679	0.391944	1.05003	0.88356	1.09096	0.771599
ENSG00000100697	DICER1	72.4812	45.396	43.2402	44.6249	-0.674659	2.68457e-81	-0.745024	4.66664e-48	-0.699349	1.47473e-52	0.0456759	0.868152	0.782936	0.241183	0.646893	0.199091	1.01308	0.965233
ENSG00000100722	ZC3H14	42.1419	28.2529	27.6304	26.1557	-0.576224	1.62641e-57	-0.608505	1.59886e-33	-0.687227	1.50636e-51	-0.0787227	0.529525	0.99081	0.964716	0.842532	0.607346	1.25722	0.442641
ENSG00000100813	ACIN1	114.476	110.258	107.035	111.693	-0.0541364	0.0496026	-0.0970093	0.013614	-0.0354717	0.376628	0.0615379	0.505462	0.681605	0.0666924	0.541669	0.068526	0.909202	0.74949
ENSG00000100823	APEX1	82.5337	83.8262	87.8573	82.1603	0.0223085	0.603634	0.090088	0.0895071	-0.00665597	0.999193	-0.0967447	0.358	1.35085	0.150116	1.35352	0.364959	1.41855	0.248142
ENSG00000100836	PABPN1	138.53	62.5683	60.0365	64.3346	-1.14675	1.37919e-212	-1.20627	7.32196e-107	-1.10662	2.588e-113	0.0996558	0.378387	0.67618	0.061144	0.529246	0.0621989	0.972054	0.924277
ENSG00000100883	SRP54	71.9967	39.4936	39.2108	37.9713	-0.866137	3.76283e-138	-0.876584	1.54047e-67	-0.922716	1.08724e-91	-0.0461319	0.849585	1.0401	0.850559	1.00838	0.980019	0.655814	0.154104
ENSG00000100890	KIAA0391	12.4397	3.2701	3.32643	3.14478	-1.92426	0	-1.90197	2.54786e-297	-1.97901	0	-0.0770377	0.503615	0.949801	0.805293	0.925389	0.817128	0.70632	0.246948
ENSG00000100902	PSMA6	46.0168	16.0344	17.6229	15.1004	-1.52053	6.51768317538909e-311	-1.38442	1.17009e-120	-1.607	5.56534e-196	-0.222578	0.00638353	1.70968	0.0103682	1.48503	0.235363	1.1284	0.691205
ENSG00000100941	PNN	149.026	68.9618	66.7146	72.2822	-1.11158	3.03763e-235	-1.15938	6.3922e-118	-1.04376	1.18434e-120	0.115622	0.192208	0.827138	0.363833	0.600041	0.130979	0.712457	0.259021
ENSG00000101104	PABPC1L	95.5165	17.8595	17.4554	19.2714	-2.41909	7.55854e-205	-2.45202	6.06637e-90	-2.30935	2.07713e-102	0.142687	0.656691	0.756569	0.181186	0.921231	0.80582	0.581516	0.0662737
ENSG00000101138	CSTF1	19.4864	20.8996	20.7554	19.5792	0.100761	0.00096835	0.0909537	0.0352989	0.00665892	0.972835	-0.0842976	0.320204	0.881203	0.544285	1.01381	0.967241	0.648915	0.143889
ENSG00000101146	RAE1	13.5376	22.9433	22.1594	21.9874	0.76048	2.24086e-132	0.710515	8.47073e-67	0.699245	2.7889e-77	-0.0112733	1	0.625335	0.0238983	1.03385	0.920576	0.746924	0.326132
ENSG00000101161	PRPF6	76.8964	108.215	106.849	103.13	0.492763	3.19912e-46	0.474554	7.97393e-24	0.423323	8.20054e-23	-0.0512313	0.815624	0.619448	0.0211594	1.29639	0.437683	0.507206	0.0229676
ENSG00000101210	EEF1A2	18.8862	51.9673	34.704	27.046	1.46004	4.0823e-28	0.877508	7.07581e-08	0.517868	0.000819837	-0.35965	0.307674	0.865687	0.48874	1.41958	0.293749	0.827203	0.524067
ENSG00000101343	CRNKL1	15.6078	24.7761	23.1148	24.061	0.666044	1.47427e-94	0.566007	5.17919e-40	0.623933	3.07968e-58	0.0579257	0.693165	1.01421	0.946155	1.42198	0.291405	1.23779	0.478852
ENSG00000101347	SAMHD1	112.964	74.0788	71.3797	71.8526	-0.6087	9.57074e-15	-0.662273	1.22273e-08	-0.652727	3.57411e-10	0.00954631	1	0.816335	0.33145	0.593589	0.118673	0.715506	0.262244
ENSG00000101361	NOP56	81.7961	61.5381	60.5596	58.3467	-0.41071	3.04895e-26	-0.433667	5.39537e-15	-0.487593	1.63176e-22	-0.0539263	0.832706	0.810865	0.314245	1.6135	0.149874	0.626997	0.114197
ENSG00000101391	CDK5RAP1	16.1889	16.5375	15.9823	15.8077	0.0305124	0.382395	-0.0181897	0.796203	-0.0345913	0.460249	-0.0164021	1	0.665457	0.0511785	0.696249	0.281564	0.772991	0.389423
ENSG00000101452	DHX35	10.2	11.4301	11.0016	11.3599	0.164382	1.32967e-07	0.109218	0.0168122	0.155741	9.4456e-05	0.0465243	0.807824	0.809131	0.309886	0.726115	0.337926	0.919794	0.779145
ENSG00000101489	CELF4	3.61037	3.14871	1.53411	1.44665	-0.196835	0.192451	-1.23156	2.04787e-12	-1.31629	5.11143e-17	-0.0847232	1	0.657054	0.0432439	1.18278	0.614676	0.507716	0.0231788
ENSG00000101654	RNMT	35.9186	29.7374	30.5381	28.1949	-0.272187	3.91897e-15	-0.23401	2.96751e-06	-0.348849	6.00917e-15	-0.114841	0.215056	1.22848	0.325731	1.84125	0.0697711	1.108	0.733895
ENSG00000101665	SMAD7	13.7551	24.3166	27.1825	22.3007	0.821795	1.1266e-69	0.982398	5.39787e-57	0.696906	8.0953e-34	-0.285503	0.00330999	0.777346	0.227612	0.817059	0.549393	0.823525	0.514337
ENSG00000101782	RIOK3	65.1205	89.5662	90.3771	97.3969	0.459828	9.77935e-18	0.472777	8.49297e-11	0.580783	7.1278e-19	0.108007	0.622745	1.61192	0.0223405	1.22363	0.544804	1.18504	0.570987
ENSG00000101811	CSTF2	5.24533	10.5824	11.4011	10.2748	1.01226	1.60279e-157	1.11947	5.51943e-111	0.970119	9.79674e-98	-0.149363	0.111206	1.20817	0.364748	1.12975	0.714619	0.943984	0.8467
ENSG00000101888	NXT2	5.13951	7.2278	7.2494	7.42538	0.492101	3.54389e-26	0.495976	1.41991e-14	0.531401	9.00731e-20	0.0354228	1	1.28344	0.231187	1.52852	0.202474	0.872059	0.645936
ENSG00000101916	TLR8	0.546312	2.98278	2.66094	3.20739	2.43877	4.19063e-72	2.27333	1.08097e-40	2.54305	2.16406e-58	0.269646	0.65094	1.12314	0.577461	0.880866	0.703784	0.962402	0.897742
ENSG00000102021	LUZP4	0.00116765	0.00601467	0.00785564	0.00500298	1.37945	3.451e-08	1.59814	2.7057e-07	1.16319	7.31442e-05	-0.484237	0.656333	0.906651	0.683878	0.769147	0.466906	1.326	0.429792
ENSG00000102053	ZC3H12B	2.02355	2.52896	2.12653	2.53672	0.323202	5.77495e-09	0.072628	0.438051	0.327998	1.54031e-06	0.255433	0.035116	0.675031	0.0593409	0.645568	0.191939	1.02297	0.939407
ENSG00000102081	FMR1	29.3341	31.5374	32.1807	31.2254	0.105027	0.000120972	0.133852	0.000572461	0.0908308	0.0119617	-0.0430219	0.771366	1.06272	0.770521	1.19277	0.59645	0.795378	0.441673
ENSG00000102103	PQBP1	46.4949	40.8527	38.0673	40.222	-0.186995	3.21363e-06	-0.288469	3.7094e-07	-0.209439	4.78562e-05	0.0790313	0.620736	0.666492	0.052824	0.777368	0.451552	1.01295	0.965664
ENSG00000102241	HTATSF1	36.9824	59.6529	57.084	52.8804	0.689787	4.50466e-69	0.626343	9.46068e-37	0.516038	6.76059e-30	-0.110307	0.303818	0.881159	0.543747	1.28081	0.459437	0.565746	0.0557619
ENSG00000102309	PIN4	9.0356	11.0203	11.1864	10.64	0.285422	8.71724e-14	0.30785	9.73865e-09	0.234581	1.85525e-06	-0.073275	0.668724	0.952371	0.814937	1.28461	0.45195	1.21582	0.514118
ENSG00000102317	RBM3	229.8	172.574	178.352	172.233	-0.413169	1.7736e-15	-0.365644	1.56248e-06	-0.416024	1.04466e-09	-0.0503808	0.969454	1.11795	0.593013	1.24989	0.502506	0.961831	0.896372
ENSG00000102699	PARP4	45.9442	94.4792	91.642	104.991	1.03997	1.27894e-89	0.995912	1.09858e-48	1.19218	2.3085e-83	0.196265	0.135286	1.43358	0.0860766	1.42075	0.296414	1.14435	0.651555
ENSG00000102738	MRPS31	9.90535	10.3263	9.94877	10.5246	0.0588705	0.0298918	0.00622466	0.990311	0.0860428	0.0123643	0.0798226	0.274273	0.680188	0.0634901	0.555756	0.077948	0.639786	0.131776
ENSG00000102786	INTS6	36.9423	24.2108	23.6659	24.9055	-0.609185	2.10971e-36	-0.642055	1.38964e-19	-0.568307	3.65686e-19	0.0737516	0.804937	1.11688	0.595844	1.00609	0.985493	0.706785	0.245003
ENSG00000102898	NUTF2	40.5095	63.3767	69.1238	62.1407	0.645354	7.47844e-69	0.770723	1.32452e-55	0.616895	2.32126e-42	-0.15383	0.0816427	0.946535	0.792176	0.681442	0.249925	1.1468	0.646395
ENSG00000102921	N4BP1	31.8027	42.6549	45.2385	41.7672	0.423647	6.48049e-60	0.508301	4.85301e-47	0.393476	6.49238e-34	-0.114827	0.0586435	0.930423	0.729396	0.608393	0.137511	0.922529	0.78721
ENSG00000103005	USB1	25.328	39.7738	44.436	39.1006	0.650683	3.89373e-87	0.810497	2.89819e-82	0.62615	4.23362e-58	-0.184351	0.00584897	0.918335	0.683899	0.705161	0.295191	0.510096	0.0230443
ENSG00000103067	ESRP2	70.7217	32.1498	28.3566	37.8585	-1.13732	9.51571e-70	-1.31842	2.44316e-44	-0.901477	8.58591e-28	0.416948	0.000899624	1.38122	0.122991	1.17375	0.630963	1.66559	0.0934775
ENSG00000103194	USP10	31.967	43.2659	44.989	42.6825	0.43696	2.31291e-61	0.49315	8.08536e-42	0.417434	5.22867e-36	-0.0757185	0.352967	1.19934	0.383715	1.26102	0.486275	0.774393	0.38996
ENSG00000103248	MTHFSD	14.5206	12.8133	12.7543	13.1837	-0.180722	2.5636e-08	-0.187166	6.56178e-05	-0.139659	0.00107717	0.0475105	0.813262	0.736265	0.141314	0.810762	0.530925	0.584138	0.0697212
ENSG00000103319	EEF2K	45.4914	29.1132	27.8284	30.5396	-0.643381	4.8543e-78	-0.708606	2.21153e-45	-0.574321	1.05265e-37	0.134289	0.114067	1.0356	0.867249	1.2886	0.448464	0.742386	0.318945
ENSG00000103342	GSPT1	105.624	89.7508	90.5074	88.9883	-0.234888	2.5187e-11	-0.222736	1.51207e-05	-0.247201	8.13583e-08	-0.0244659	1	1.2431	0.297547	1.1482	0.678203	1.00098	0.997373
ENSG00000103356	EARS2	18.9658	16.5579	17.1224	16.0378	-0.195545	5.96477e-08	-0.147046	0.00598265	-0.241479	2.47304e-07	-0.094436	0.406811	1.34662	0.156828	1.48855	0.236216	1.06276	0.838561
ENSG00000103495	MAZ	14.3252	32.5479	34.8017	29.8241	1.18378	1.27271e-220	1.28033	1.80978e-153	1.0578	8.52316e-122	-0.222545	0.00449248	0.827985	0.366433	1.04781	0.888732	0.671391	0.181284
ENSG00000103510	KAT8	32.844	27.9657	27.0696	27.832	-0.232072	2.20797e-18	-0.278807	2.09896e-13	-0.239089	3.01028e-12	0.03972	0.807824	0.673873	0.0606198	0.974618	0.93852	0.768808	0.391139
ENSG00000103707	MTFMT	4.70351	7.25025	6.98634	7.32488	0.621973	2.00157e-103	0.568897	3.66102e-47	0.636456	6.56387e-71	0.0675577	0.509862	0.952109	0.813953	1.0685	0.842658	0.915399	0.76684
ENSG00000103994	ZNF106	48.43	43.0242	42.1766	41.2506	-0.170518	9.76425e-05	-0.19936	0.00168001	-0.231267	4.08565e-05	-0.0319071	1	1.02133	0.91939	0.869309	0.674585	0.881155	0.671169
ENSG00000104129	DNAJC17	7.06544	12.4761	12.4552	13.0379	0.818145	1.33121e-128	0.816515	2.66469e-72	0.881184	7.31077e-101	0.0646665	0.664516	0.829105	0.369886	0.674617	0.241259	0.917597	0.77343
ENSG00000104131	EIF3J	78.346	43.1282	43.3063	44.5097	-0.861186	2.35941e-126	-0.855135	3.00024e-59	-0.815765	6.36079e-67	0.0393721	0.928517	1.34764	0.153391	1.22989	0.534656	0.83931	0.556424
ENSG00000104177	MYEF2	28.851	9.5073	7.04728	8.37177	-1.60091	4.74588e-89	-2.03276	2.04366e-71	-1.78426	1.5973e-71	0.248533	0.186513	0.55788	0.00502019	0.736011	0.358923	0.553738	0.0469242
ENSG00000104299	INTS9	11.8747	12.8796	12.3675	12.6762	0.116846	0.00015275	0.0586841	0.221321	0.0940031	0.0193163	0.0353203	0.904736	0.843105	0.412519	0.968187	0.922732	1.05723	0.852237
ENSG00000104356	POP1	4.69713	5.27524	5.61033	4.9025	0.166829	0.000542625	0.255456	0.000133144	0.0618157	0.390189	-0.193665	0.0848102	1.05298	0.805578	0.962289	0.908325	0.696287	0.225036
ENSG00000104408	EIF3E	300.634	185.147	194.419	180.388	-0.699344	3.08514e-67	-0.628815	1.50263e-26	-0.736925	1.47872e-43	-0.10811	0.393532	1.76228	0.0071882	1.6661	0.12689	0.659781	0.160164
ENSG00000104413	ESRP1	80.9449	63.9299	65.2578	64.7126	-0.340408	6.58434e-08	-0.310728	0.000931136	-0.322802	0.00011604	-0.0120741	1	1.83641	0.00386165	2.519	0.00581188	1.43188	0.235579
ENSG00000104529	EEF1D	457.762	104.714	111.845	99.8585	-2.1283	0	-2.03307	2.47739e-199	-2.19686	2.31479e-285	-0.163792	0.114628	0.976929	0.910891	1.53348	0.202545	0.648288	0.145373
ENSG00000104613	INTS10	81.6888	36.0765	33.5875	34.8432	-1.17934	5.38374e-178	-1.28226	6.21106e-100	-1.22954	4.89296e-115	0.0527204	0.860161	0.848559	0.430878	0.82565	0.567275	0.941147	0.838802
ENSG00000104626	ERI1	7.67242	10.9119	11.7529	10.6279	0.507482	7.57656e-33	0.614162	2.73059e-26	0.469536	1.41658e-18	-0.144638	0.20841	1.27481	0.244096	1.21653	0.555893	0.818501	0.501126
ENSG00000104679	R3HCC1	40.8703	23.0822	22.487	21.2463	-0.824862	7.84443e-97	-0.862126	7.75641e-54	-0.944671	1.66466e-78	-0.0825457	0.564886	0.564856	0.00646859	0.418768	0.00963971	0.703146	0.240817
ENSG00000104824	HNRNPL	131.033	132.739	132.132	135.847	0.0186711	0.513848	0.0120488	0.853501	0.0520887	0.120308	0.0400401	0.748496	1.15157	0.498261	1.23593	0.52434	1.09418	0.763172
ENSG00000104835	SARS2	19.3934	3.7939	3.57208	3.81215	-2.35565	0	-2.44108	1.78738e-226	-2.34859	6.0136e-267	0.0925272	0.637504	0.855028	0.45254	1.69318	0.112231	0.625199	0.114095
ENSG00000104852	SNRNP70	462.497	143.124	140.678	142.553	-1.69219	2.49146e-263	-1.71705	3.50728e-119	-1.69796	4.90703e-146	0.0190892	1	0.446261	0.000113381	0.462361	0.0226856	0.55477	0.0463119
ENSG00000104859	CLASRP	69.467	31.0817	30.6959	31.5727	-1.16036	1.41914e-144	-1.1783	6.13235e-68	-1.13771	5.18286e-79	0.0405909	0.994637	0.520973	0.00180029	0.529123	0.0621001	0.717795	0.264961
ENSG00000104872	PIH1D1	29.6907	43.2635	41.4019	44.1897	0.542862	4.76692e-60	0.479736	1.8948e-25	0.573496	2.36008e-43	0.0937596	0.370794	0.846646	0.424117	1.04037	0.905636	0.808489	0.475096
ENSG00000104889	RNASEH2A	5.71273	12.2324	13.1344	11.4981	1.09702	3.43454e-108	1.20024	1.6475e-74	1.00786	1.87887e-61	-0.1924	0.128617	1.44317	0.0779879	2.31545	0.0127246	1.18682	0.565254
ENSG00000104897	SF3A2	45.3118	47.2812	45.5567	48.1117	0.0611132	0.215571	0.00757275	1	0.0862706	0.179	0.0786988	0.723762	0.576823	0.00826485	0.985802	0.965781	0.880177	0.669067
ENSG00000104907	TRMT1	42.3045	25.8374	25.2576	25.7947	-0.711838	9.42999e-54	-0.744362	5.17096e-28	-0.714189	7.89835e-32	0.0301752	1	0.911305	0.6562	0.925529	0.816641	0.935378	0.822714
ENSG00000104967	NOVA2	3.61029	5.25802	5.27081	3.38601	0.541962	5.71008e-10	0.54562	6.918e-07	-0.092716	0.474045	-0.638434	3.3464e-05	0.705445	0.0932864	0.750351	0.387988	0.62675	0.114604
ENSG00000105127	AKAP8	37.8535	26.2066	25.5402	27.0722	-0.53051	2.3232e-113	-0.567932	1.30539e-63	-0.4834	1.42161e-57	0.0845355	0.163486	0.964199	0.861194	1.02062	0.951238	1.14442	0.650773
ENSG00000105171	POP4	14.61	20.8281	22.5799	19.2301	0.510986	2.93728e-38	0.62742	8.62125e-32	0.396154	1.571e-15	-0.231275	0.00549362	0.804508	0.296355	1.14579	0.682833	0.742805	0.316984
ENSG00000105193	RPS16	629.122	564.743	577.761	533.025	-0.155775	0.00307888	-0.122874	0.128783	-0.239164	0.000418912	-0.11629	0.524013	1.1833	0.419122	1.25424	0.495852	0.979569	0.944813
ENSG00000105202	FBL	82.2356	97.5294	96.7035	94.4318	0.245877	2.28642e-07	0.233764	0.000572634	0.199331	0.00126971	-0.0344332	1	1.19185	0.399457	1.70572	0.107175	1.07372	0.811433
ENSG00000105258	POLR2I	12.6065	15.6946	14.1686	15.0972	0.315274	1.49339e-09	0.168368	0.02652	0.259441	7.66667e-05	0.0910753	0.708165	0.817822	0.334443	1.38373	0.328508	0.829699	0.530697
ENSG00000105278	ZFR2	0.4132	0.680037	0.314402	0.295249	0.71518	2.18325e-06	-0.394466	0.0534384	-0.477368	0.00684922	-0.0829795	1	0.682501	0.0663369	0.672787	0.237985	0.58637	0.0706474
ENSG00000105298	CACTIN	16.1897	15.6645	15.0157	15.4887	-0.0480818	0.22625	-0.109038	0.0458596	-0.0640385	0.216122	0.0450015	0.883159	0.685987	0.0714323	0.798393	0.501138	0.875299	0.656829
ENSG00000105323	HNRNPUL1	128.363	169.18	174.955	162.185	0.398314	2.68541e-49	0.44668	3.99246e-33	0.337444	5.8316e-23	-0.109236	0.103069	1.13468	0.546671	1.44871	0.266369	0.854448	0.599672
ENSG00000105364	MRPL4	14.7211	28.3161	26.3953	28.3044	0.943055	3.00893e-119	0.84216	1.01239e-53	0.942579	1.80454e-80	0.100419	0.477993	0.840985	0.405754	1.16763	0.642172	0.969925	0.918438
ENSG00000105372	RPS19	771.825	679.795	602.78	656.19	-0.183202	0.00512506	-0.356642	0.000110567	-0.234178	0.00541189	0.122464	0.644349	1.15118	0.500821	1.41044	0.300575	1.2445	0.465049
ENSG00000105373	GLTSCR2	709.783	265.98	239.057	267.589	-1.41612	1.81858e-135	-1.57002	8.14747e-75	-1.40741	8.20591e-77	0.162614	0.319636	0.642529	0.0351915	NA	NA	NA	NA
ENSG00000105447	GRWD1	28.9526	31.4132	31.3446	31.0148	0.117305	0.00117919	0.114401	0.0309724	0.0989354	0.039818	-0.0154666	1	0.730458	0.131229	0.847512	0.621419	0.705281	0.239282
ENSG00000105576	TNPO2	56.4404	60.0093	58.8591	55.0798	0.0884673	0.00376802	0.0605473	0.161434	-0.035125	0.412368	-0.0956733	0.185555	0.708738	0.0977842	0.606137	0.131481	0.869033	0.637569
ENSG00000105618	PRPF31	20.0099	37.4761	37.9517	35.954	0.904769	1.60281e-148	0.923185	9.87592e-87	0.845033	4.57591e-86	-0.0781562	0.558662	0.796009	0.273873	1.31456	0.411194	0.724004	0.277687
ENSG00000105640	RPL18A	626.306	309.219	285.255	295.502	-1.01831	2.9888e-66	-1.13461	1.09106e-38	-1.08376	4.99158e-44	0.0508514	1	1.04106	0.846958	1.02496	0.94104	1.36024	0.301277
ENSG00000105671	DDX49	29.3829	28.3542	27.7181	27.8872	-0.0520007	0.184387	-0.084342	0.133328	-0.0758114	0.13442	0.00853097	1	0.836296	0.391624	0.985278	0.964511	1.13667	0.667297
ENSG00000105705	SUGP1	21.2209	21.266	20.3585	21.0833	0.0026515	0.996729	-0.0598881	0.181352	-0.0096005	0.915926	0.0502892	0.699847	0.578101	0.0085344	0.755256	0.401115	0.929268	0.805648
ENSG00000105771	SMG9	12.8791	32.2533	32.9767	32.3986	1.32387	6.33417e-263	1.35588	7.36577e-160	1.33045	6.84496e-181	-0.0254354	1	0.824834	0.355433	0.843185	0.608975	0.700974	0.23198
ENSG00000105793	GTPBP10	12.4028	13.9174	13.4672	13.9692	0.166086	2.44226e-08	0.118666	0.00633958	0.171845	6.53387e-06	0.0531799	0.705739	1.01733	0.934562	1.3973	0.316306	0.973518	0.928712
ENSG00000105865	DUS4L	3.25808	5.08779	5.25275	4.74139	0.640434	2.74209e-57	0.687053	1.1972e-36	0.538693	5.4433e-27	-0.148388	0.149324	0.979023	0.91932	1.24652	0.510344	0.945329	0.851321
ENSG00000105939	ZC3HAV1	25.342	34.5969	35.9669	32.2681	0.44895	1.13151e-36	0.504727	1.68439e-25	0.348588	5.96482e-15	-0.156142	0.0602825	1.11158	0.612105	0.912868	0.784727	0.90593	0.740827
ENSG00000106105	GARS	71.2723	84.0243	84.2941	77.8733	0.237526	1.72197e-05	0.242213	0.00199393	0.127872	0.0885951	-0.114342	0.591521	1.09995	0.648891	1.54415	0.191699	0.827675	0.527786
ENSG00000106246	PTCD1	11.3654	5.08434	4.84672	5.11946	-1.16153	5.59012e-193	-1.22898	2.13105e-99	-1.15084	2.80071e-109	0.0781608	0.623897	0.691972	0.0768714	0.701486	0.291751	0.809866	0.479523
ENSG00000106263	EIF3B	165.126	146.534	148.726	138.844	-0.172394	7.90075e-05	-0.150899	0.0201042	-0.25016	8.88e-06	-0.0992614	0.512014	1.09435	0.665636	1.54005	0.194477	0.659947	0.162923
ENSG00000106305	AIMP2	5.54143	11.4573	11.6505	11.2878	1.04694	3.30897e-138	1.07134	3.94059e-81	1.02554	7.19937e-88	-0.0458114	0.938971	1.30118	0.207139	2.5012	0.00622702	0.566176	0.0546266
ENSG00000106344	RBM28	31.4439	18.9792	18.8875	17.7532	-0.72811	1.7878e-135	-0.735248	5.1129e-71	-0.824064	2.43759e-108	-0.0888168	0.262569	0.831962	0.376952	0.91976	0.801813	1.07887	0.799407
ENSG00000106355	LSM5	18.147	19.7022	19.358	19.3907	0.118008	0.00308677	0.0932569	0.122436	0.0950558	0.0750689	0.00179869	1	1.09242	0.671799	1.35981	0.355366	1.13952	0.661826
ENSG00000106462	EZH2	10.8605	9.64959	9.86226	9.76416	-0.170423	0.00188356	-0.139142	0.0977265	-0.152862	0.0376578	-0.0137197	1	1.36261	0.138619	1.20966	0.568004	0.898433	0.719888
ENSG00000106591	MRPL32	39.4278	25.8112	25.0632	26.1791	-0.611127	2.19271e-81	-0.653465	1.87066e-44	-0.590733	3.64176e-45	0.0627348	0.648231	1.19058	0.402678	1.38726	0.324689	1.24642	0.461889
ENSG00000106682	EIF4H	226.026	143.549	153.498	133.492	-0.654913	1.01027e-94	-0.558253	8.03191e-35	-0.759661	6.56822e-76	-0.201409	0.00151734	1.4339	0.0870271	1.35399	0.368177	0.910399	0.753314
ENSG00000107105	ELAVL2	0.103224	0.280151	0.180577	0.177856	1.42422	1.34352e-19	0.805861	8.2114e-05	0.778734	3.22429e-05	-0.0276076	1	0.562974	0.00576556	0.408438	0.00763946	0.720259	0.269977
ENSG00000107164	FUBP3	44.8841	38.4081	37.9993	36.0566	-0.224425	5.27805e-12	-0.240007	1.48942e-07	-0.315398	1.2539e-14	-0.0753915	0.487636	1.01818	0.931288	1.18912	0.603425	0.871557	0.644545
ENSG00000107201	DDX58	15.3809	21.361	22.8895	21.6225	0.474048	3.84009e-19	0.573527	1.90703e-15	0.49171	1.07203e-13	-0.0818215	0.795489	1.30093	0.206186	1.32451	0.398329	0.739116	0.309845
ENSG00000107290	SETX	53.7988	65.8346	64.9488	65.0072	0.291488	5.14017e-18	0.271819	1.10379e-08	0.273286	2.18302e-10	0.00146609	1	0.900636	0.615658	0.628998	0.166437	0.871618	0.644717
ENSG00000107371	EXOSC3	8.32229	9.41556	9.09002	9.41176	0.176482	1.04535e-08	0.126351	0.00480687	0.176086	7.75424e-06	0.0497378	0.76557	0.764791	0.198051	0.857741	0.646984	0.733968	0.297749
ENSG00000107581	EIF3A	319.083	173.801	169.056	175.334	-0.876467	7.06047e-73	-0.916396	2.95109e-37	-0.863779	3.42619e-41	0.0526177	0.933713	1.34466	0.158883	0.876398	0.692038	1.17068	0.599009
ENSG00000107614	TRDMT1	5.16381	3.08995	3.07391	2.88837	-0.738618	1.60549e-63	-0.746606	3.46803e-32	-0.836473	1.28051e-48	-0.089873	0.603596	0.908119	0.6445	0.967213	0.920825	0.987627	0.966698
ENSG00000107625	DDX50	31.3087	28.7098	29.6465	27.7249	-0.125168	0.000101278	-0.0787114	0.113255	-0.175629	2.33276e-05	-0.0969199	0.282257	1.06604	0.759072	0.929414	0.826406	0.879099	0.666076
ENSG00000107833	NPM3	13.2309	16.6035	16.8966	15.8541	0.326667	3.63664e-09	0.352864	5.94273e-06	0.26018	0.00029249	-0.0926897	0.751992	1.37858	0.122818	1.53688	0.19665	0.733934	0.298634
ENSG00000107864	CPEB3	16.0083	5.65345	4.5095	5.64369	-1.50028	1.60441e-194	-1.82609	1.0202e-144	-1.50281	2.083e-128	0.32333	0.000397512	0.774583	0.220304	0.909931	0.777308	0.777493	0.398385
ENSG00000107929	LARP4B	50.1529	56.7231	52.7404	59.9487	0.17768	1.74706e-10	0.072725	0.0862162	0.257492	1.06456e-13	0.184769	0.000934804	0.69597	0.0811502	0.78055	0.456864	1.24387	0.466089
ENSG00000107937	GTPBP4	28.6916	35.0436	36.0972	34.6154	0.288566	6.07317e-15	0.33137	1.54946e-10	0.270797	1.07432e-08	-0.0605743	0.766185	0.961255	0.849824	1.04203	0.901692	0.600517	0.084488
ENSG00000107951	MTPAP	15.3656	14.5569	14.5544	14.7271	-0.0774224	0.00327499	-0.077463	0.0469086	-0.0607305	0.0885619	0.0167335	1	1.12859	0.561668	0.950522	0.879176	0.969471	0.917192
ENSG00000107960	OBFC1	17.431	21.5519	21.5948	23.1918	0.3061	2.18401e-08	0.309254	5.05996e-05	0.411809	1.23259e-09	0.102556	0.669103	1.66394	0.0150641	NA	NA	NA	NA
ENSG00000108064	TFAM	19.1126	21.2625	21.1792	20.9302	0.15432	2.20857e-06	0.148531	0.00153631	0.131661	0.0019805	-0.016871	1	1.25257	0.280142	0.976813	0.943976	1.15209	0.635355
ENSG00000108107	RPL28	478.952	647.276	614.3	624.517	0.434468	1.96886e-14	0.35905	7.07926e-06	0.382838	1.08052e-07	0.0237874	1	1.00633	0.975854	1.07695	0.823954	0.899235	0.721599
ENSG00000108256	NUFIP2	76.2365	84.6111	88.5118	85.2411	0.150456	1.82026e-05	0.215435	9.82549e-06	0.161171	0.000320323	-0.0542644	0.78279	1.43387	0.0870473	1.20304	0.579248	1.24257	0.479109
ENSG00000108298	RPL19	947.304	781.607	731.998	790.366	-0.277407	1.80289e-10	-0.371982	3.21996e-09	-0.261329	4.24605e-06	0.110652	0.435342	1.12368	0.576593	1.28782	0.446725	1.24579	0.465613
ENSG00000108312	UBTF	87.0043	90.9973	91.6203	87.2013	0.0645801	0.0116899	0.0744557	0.0420661	0.00306732	1	-0.071389	0.318041	0.59249	0.0118258	0.618127	0.147584	0.872887	0.648877
ENSG00000108349	CASC3	111.676	60.6126	58.707	59.0522	-0.881594	1.46467e-189	-0.927635	1.82859e-100	-0.919213	4.20387e-122	0.00842251	1	0.650413	0.0380396	0.549441	0.0721731	0.986428	0.963452
ENSG00000108406	DHX40	31.2316	28.4496	28.5508	25.9403	-0.134547	0.00182324	-0.129428	0.0385617	-0.267812	5.68817e-07	-0.138386	0.203753	0.740638	0.148365	0.832766	0.582475	0.793649	0.437328
ENSG00000108424	KPNB1	105.66	147.678	156.082	137.718	0.482932	5.09001e-54	0.56273	2.14021e-40	0.382225	1.3366e-22	-0.180506	0.00636375	1.52559	0.0444671	1.33449	0.387992	0.991883	0.978631
ENSG00000108506	INTS2	7.806	9.39099	9.04846	8.85008	0.267423	1.82227e-09	0.213072	0.000662634	0.182187	0.00144434	-0.030889	1	0.96501	0.864493	1.0879	0.800405	0.882804	0.676359
ENSG00000108561	C1QBP	35.7322	39.357	33.3088	38.8199	0.139163	0.00169009	-0.101267	0.113647	0.119254	0.0288007	0.220525	0.0115749	0.918771	0.684719	0.968804	0.924366	1.13697	0.666647
ENSG00000108591	DRG2	29.0201	16.1931	15.8658	15.9526	-0.842023	2.09745e-191	-0.870907	3.44436e-97	-0.864185	4.86405e-118	0.00672485	1	0.65088	0.041828	0.752125	0.394136	0.482278	0.0183993
ENSG00000108592	FTSJ3	33.3344	42.9585	43.1523	42.6426	0.3657	4.5482e-25	0.372213	5.56993e-14	0.355095	3.00191e-15	-0.0171194	1	0.999769	0.999115	1.25709	0.494206	0.385591	0.00104428
ENSG00000108651	UTP6	27.3832	28.1857	29.2731	27.7193	0.0409582	0.128657	0.095888	0.00929341	0.0167164	0.705072	-0.0791735	0.261791	0.950941	0.80939	1.12554	0.723007	0.698586	0.22748
ENSG00000108654	DDX5	544.461	420.884	416.563	406.545	-0.371402	2.69879e-24	-0.386299	2.37369e-13	-0.421413	6.39122e-19	-0.0351137	0.971966	0.6111	0.0183697	0.55006	0.0803992	0.545715	0.0395861
ENSG00000108771	DHX58	9.9497	18.4644	19.0282	19.4297	0.891357	6.43903e-86	0.934608	9.34934e-55	0.964868	2.1368e-69	0.0302574	1	1.08207	0.705212	0.874981	0.688908	1.00579	0.984557
ENSG00000108825	PTGES3L-AARSD1	0.00618328	0.0740303	0.0618376	0.0861605	3.23622	7.15524e-72	2.9421	6.09458e-41	3.4196	3.77637e-64	0.471607	0.284396	0.66728	0.0516558	0.663232	0.21762	0.741358	0.316682
ENSG00000108826	MRPL27	21.1741	27.3523	25.2276	26.6497	0.368644	5.59197e-17	0.252465	4.39422e-05	0.331128	1.66816e-09	0.078664	0.70117	0.798793	0.28029	0.86058	0.652587	0.937219	0.828187
ENSG00000108848	LUC7L3	231.601	83.3362	78.6675	85.1784	-1.47456	3.59794e-279	-1.55772	4.67235e-138	-1.44304	2.87873e-150	0.114686	0.346541	0.666269	0.0526265	0.937974	0.847871	0.647268	0.146321
ENSG00000108883	EFTUD2	48.0403	67.1438	68.8745	67.1341	0.482677	1.63227e-55	0.519428	1.88259e-34	0.482518	1.2155e-35	-0.0369111	0.90621	1.29902	0.210042	1.24757	0.506747	0.830778	0.533573
ENSG00000109111	SUPT6H	114.452	104.761	105.038	102.367	-0.127607	5.1658e-06	-0.123808	0.00261439	-0.160918	9.59135e-06	-0.0371105	0.853743	0.774008	0.218086	0.911039	0.779777	0.933412	0.817225
ENSG00000109475	RPL34	580.498	359.109	325.199	361.249	-0.692924	2.85584e-46	-0.835954	2.975e-32	-0.684361	1.72586e-27	0.151593	0.259764	0.8709	0.507446	1.06738	0.844888	0.791545	0.432968
ENSG00000109534	GAR1	8.31516	13.2931	13.9728	12.7755	0.675504	1.70641e-70	0.748268	1.7804e-47	0.618017	1.3697e-38	-0.130262	0.214475	1.4389	0.0799446	1.08674	0.802882	1.40302	0.256726
ENSG00000109536	FRG1	14.9314	15.0892	15.0696	14.7198	0.0143911	0.763258	0.0131847	0.908407	-0.0218056	0.746877	-0.0349918	0.955414	0.873193	0.516066	0.580538	0.107337	1.16794	0.606637
ENSG00000109606	DHX15	108.736	85.6712	88.0681	85.8194	-0.343785	1.3121e-31	-0.30407	8.79414e-13	-0.34123	4.72096e-19	-0.0371599	0.882665	1.23107	0.318939	0.860782	0.653094	0.96623	0.908466
ENSG00000109618	SEPSECS	24.0076	12.6898	10.5902	13.4999	-0.919149	3.01609e-116	-1.1802	1.30399e-94	-0.829719	2.11422e-61	0.350504	1.24953e-06	0.907346	0.64118	0.762997	0.416378	1.00121	0.996787
ENSG00000109819	PPARGC1A	11.4082	8.19713	5.3479	9.46753	-0.477121	3.68831e-07	-1.09245	8.24367e-16	-0.269397	0.0299176	0.823127	1.71391e-06	0.866641	0.492176	0.706513	0.297875	0.725563	0.282845
ENSG00000109832	DDX25	0.638612	1.10104	0.578687	0.560026	0.784006	5.22956e-08	-0.137849	0.570723	-0.185557	0.342461	-0.0477438	1	0.562652	0.00589418	1.04119	0.9036	0.520856	0.0308302
ENSG00000110060	PUS3	15.1782	8.14169	8.0257	8.16025	-0.899013	1.04232e-86	-0.919215	1.93063e-42	-0.895931	7.72052e-50	0.0232903	1	1.27404	0.248336	1.85272	0.0668884	0.903337	0.7346
ENSG00000110063	DCPS	9.84902	13.2237	13.1692	13.2776	0.423883	1.22406e-18	0.418151	5.46005e-10	0.429861	1.87758e-12	0.0117078	1	0.806124	0.300852	0.785721	0.471079	0.715849	0.26009
ENSG00000110104	CCDC86	13.2706	18.3508	18.3895	16.6525	0.467269	1.19727e-24	0.470299	2.4744e-14	0.327104	9.66353e-09	-0.143202	0.256674	1.20742	0.368154	1.27107	0.473469	0.932653	0.815464
ENSG00000110107	PRPF19	74.7265	82.7865	83.1431	80.5029	0.147643	3.39412e-05	0.153931	0.00263791	0.107304	0.0237033	-0.0466274	0.859932	1.38288	0.120605	1.73091	0.100309	0.973789	0.929029
ENSG00000110321	EIF4G2	377.372	558.24	579.405	532.569	0.564921	2.50915e-86	0.618595	2.97532e-56	0.497009	1.97708e-43	-0.121586	0.0821149	1.24743	0.28987	1.2204	0.549484	0.928153	0.802529
ENSG00000110367	DDX6	44.2654	99.2631	101.405	96.3059	1.16516	5.15971e-243	1.19592	4.23339e-146	1.12153	3.97777e-151	-0.0743917	0.603911	1.30467	0.202529	0.932999	0.835155	0.806091	0.468927
ENSG00000110619	CARS	36.7764	43.0479	44.9473	42.85	0.227399	1.22204e-06	0.289762	1.0251e-05	0.220781	0.000257141	-0.0689816	0.813893	1.36418	0.139422	1.16722	0.642926	1.05111	0.868815
ENSG00000110700	RPS13	400.462	268.4	260.807	269.111	-0.577345	9.32121e-41	-0.61866	1.45896e-22	-0.573544	5.42331e-24	0.0451156	0.947711	1.22937	0.321263	1.27066	0.471322	0.800721	0.455198
ENSG00000110844	PRPF40B	15.6971	6.7563	6.71628	6.33698	-1.21608	3.10596e-149	-1.22459	4.64034e-71	-1.30874	2.58524e-99	-0.0841523	0.684657	0.717951	0.111756	1.09964	0.775933	0.558899	0.0524982
ENSG00000110888	CAPRIN2	52.2124	27.255	34.2184	25.5104	-0.937845	1.01463e-39	-0.609614	9.06405e-10	-1.03327	4.44266e-30	-0.423661	0.00198704	1.06942	0.747553	0.992686	0.982458	1.12142	0.702328
ENSG00000110958	PTGES3	132.959	179.11	188.904	169.615	0.429863	1.03759e-32	0.506684	1.58192e-24	0.351257	1.64017e-14	-0.155428	0.0726488	1.42523	0.0894899	1.41828	0.295028	1.65954	0.0866397
ENSG00000111196	MAGOHB	5.38519	8.51525	9.11145	8.14292	0.66062	3.30712e-64	0.758903	9.27106e-47	0.595706	2.53227e-34	-0.163215	0.0861855	1.19211	0.398754	1.47386	0.24234	0.843488	0.568462
ENSG00000111331	OAS3	9.62382	64.0929	71.4928	65.7404	2.73497	8.52367e-228	2.89253	4.54721e-177	2.77158	6.87882e-183	-0.120959	0.825099	1.69952	0.0112724	1.4797	0.237516	1.28677	0.399402
ENSG00000111335	OAS2	3.22789	56.0294	59.8599	61.4988	4.11586	0	4.21112	9.53317e-288	4.25013	3.82861350275299e-319	0.0389872	1	1.33265	0.16789	1.32684	0.394645	1.04914	0.872454
ENSG00000111361	EIF2B1	41.0674	31.0546	31.055	30.5109	-0.40345	1.94129e-76	-0.403265	3.09885e-38	-0.429153	1.77517e-52	-0.0258878	0.904988	0.726345	0.126821	0.79194	0.48577	0.715914	0.263065
ENSG00000111364	DDX55	22.7685	12.9728	12.823	12.9843	-0.811416	1.35154e-105	-0.828252	7.69616e-52	-0.810239	2.73686e-61	0.0180176	1	0.796189	0.276181	0.99803	0.995287	0.831478	0.536244
ENSG00000111405	ENDOU	0.266799	0.271051	0.242664	0.306787	0.0259435	0.917295	-0.134349	0.535485	0.201765	0.208424	0.336871	0.316483	1.23705	0.307177	0.732829	0.352117	1.01612	0.95723
ENSG00000111596	CNOT2	37.2966	45.263	49.45	42.6582	0.279155	7.35395e-17	0.406622	4.16837e-19	0.193776	5.85659e-06	-0.212849	0.0017065	1.28394	0.232228	1.17875	0.621909	1.17472	0.591022
ENSG00000111605	CPSF6	73.2113	48.1608	50.1818	46.8515	-0.604027	3.81918e-88	-0.544982	3.84603e-35	-0.643642	8.30142e-59	-0.0986608	0.237136	1.09264	0.671097	1.15732	0.660866	0.911508	0.756415
ENSG00000111615	KRR1	12.3741	20.358	20.083	19.3253	0.719015	1.88474e-128	0.699346	6.94827e-70	0.643935	1.20657e-70	-0.0554149	0.674594	0.690729	0.0749391	0.75111	0.391883	0.910993	0.754975
ENSG00000111639	MRPL51	38.6485	55.1332	56.1557	50.8612	0.512316	6.04986e-30	0.539049	1.7119e-18	0.39587	2.79589e-12	-0.143181	0.260247	0.977531	0.913213	1.38818	0.325968	0.772498	0.38541
ENSG00000111640	GAPDH	224.896	1600	1850.6	1377.83	2.83071	0	3.04063	0	2.61503	0	-0.425594	0.000275901	1.63096	0.0196318	1.29456	0.440205	1.21942	0.507751
ENSG00000111641	NOP2	28.1751	32.2801	31.4756	31.9655	0.196164	0.00019302	0.159925	0.0396445	0.181984	0.00806632	0.0220594	1	1.23618	0.310161	1.15653	0.66236	0.925334	0.794648
ENSG00000111701	APOBEC1	0.0134438	4.13398	1.31668	6.26106	8.02521	2.85872e-183	6.35457	1.04192e-122	8.60759	8.1354e-208	2.24796	1.06973e-07	1.35005	0.153292	0.907822	0.77198	1.76091	0.0574514
ENSG00000111786	SRSF9	80.7869	49.8777	50.0939	47.924	-0.695615	2.61968e-111	-0.689317	5.41836e-53	-0.753328	6.63694e-77	-0.0640117	0.60196	1.03722	0.861143	1.39669	0.314693	1.16551	0.609328
ENSG00000111880	RNGTT	7.17928	11.1419	11.3584	10.4339	0.634594	2.20387e-50	0.662115	1.83307e-30	0.539998	2.74139e-24	-0.122128	0.343516	0.821093	0.345532	1.04304	0.900011	0.936218	0.825398
ENSG00000111911	HINT3	22.8304	24.4376	21.8362	24.702	0.0983187	0.00558541	-0.0639165	0.236707	0.1138	0.00971743	0.177722	0.0128427	0.648484	0.0374313	0.564102	0.0895871	0.606333	0.0939223
ENSG00000112031	MTRF1L	6.30048	5.47615	5.18657	5.41223	-0.202426	1.21069e-07	-0.280577	2.46562e-07	-0.21931	8.35778e-06	0.0612771	0.76205	0.839481	0.402579	0.731115	0.352265	0.766023	0.372871
ENSG00000112081	SRSF3	136.239	146.963	147.561	150.635	0.109234	0.000104268	0.115144	0.00451495	0.144803	5.31827e-05	0.0296592	0.939404	1.28611	0.226414	1.04318	0.899232	1.10574	0.735973
ENSG00000112110	MRPL18	20.8069	28.0973	26.7058	28.4864	0.433261	1.70971e-35	0.360155	1.34536e-13	0.45308	3.61531e-25	0.0929264	0.412228	1.07442	0.730655	1.31034	0.416745	0.756162	0.348023
ENSG00000112183	RBM24	0.385767	1.00365	0.578151	1.00786	1.37675	1.49022e-23	0.578923	0.00255493	1.38164	1.3962e-17	0.803276	0.00574329	0.807613	0.305026	0.87256	0.68419	0.700686	0.230512
ENSG00000112232	KHDRBS2	0.0319965	0.306543	0.145046	0.161652	3.16226	4.56054e-49	2.08678	7.37937e-18	2.24614	1.43904e-23	0.157983	1	0.612074	0.0191933	0.731008	0.348245	0.473597	0.0119447
ENSG00000112306	RPS12	913.969	574.028	521.298	568.684	-0.671055	3.73965e-35	-0.810026	1.32989e-24	-0.684556	3.08405e-22	0.125471	0.508322	1.00338	0.987095	0.850658	0.629268	0.879063	0.665356
ENSG00000112339	HBS1L	30.8256	22.6149	23.6063	20.7189	-0.446505	1.33804e-35	-0.384597	3.77019e-14	-0.572786	1.13363e-35	-0.188193	0.0128226	1.07633	0.724197	1.17001	0.637793	0.527933	0.0345957
ENSG00000112531	QKI	44.0064	54.3293	59.4532	52.0405	0.304134	2.04186e-09	0.434075	4.75614e-10	0.242017	0.000217525	-0.192061	0.129587	0.981907	0.930369	0.639711	0.187638	0.730635	0.291595
ENSG00000112578	BYSL	10.6983	13.6743	13.8392	13.1879	0.353061	2.33668e-14	0.370849	1.04085e-08	0.300636	4.02101e-07	-0.0702183	0.808402	0.923791	0.704017	0.936154	0.844034	0.932803	0.815525
ENSG00000112584	FAM120B	28.0466	24.5098	21.9731	24.4405	-0.194067	5.88654e-11	-0.351641	1.01066e-18	-0.198162	3.83193e-08	0.153484	0.0097637	0.562814	0.00637309	0.519334	0.054577	0.830888	0.538754
ENSG00000112651	MRPL2	21.5482	18.1458	17.0427	18.3348	-0.248308	1.07368e-11	-0.337889	9.95665e-11	-0.233338	8.36934e-07	0.104555	0.330544	0.951962	0.813336	1.17444	0.629163	0.794454	0.439349
ENSG00000112739	PRPF4B	90.5859	46.555	44.28	47.9395	-0.959945	5.2933e-225	-1.03234	3.60749e-120	-0.917718	1.11996e-119	0.114627	0.12265	0.892888	0.587493	0.65487	0.212226	0.941722	0.840403
ENSG00000112773	FAM46A	13.6868	32.8551	23.5087	30.396	1.26292	6.02227e-89	0.779858	6.95176e-25	1.15066	9.40291e-65	0.370808	0.00148105	0.616931	0.0203962	0.571153	0.108497	0.920609	0.781425
ENSG00000112855	HARS2	21.1348	26.837	26.8031	27.3722	0.344456	3.7453e-42	0.342544	2.18197e-22	0.372997	1.14763e-31	0.0304531	0.904979	1.05855	0.784919	0.781274	0.460653	0.978479	0.941956
ENSG00000112941	PAPD7	31.5736	23.62	24.4416	21.7221	-0.418493	1.58309e-44	-0.368986	9.4157e-19	-0.539248	3.2774e-46	-0.170265	0.00500222	0.716871	0.110888	1.21642	0.556085	0.706017	0.240703
ENSG00000112996	MRPS30	19.5211	23.3516	22.4516	23.408	0.257878	4.4001e-17	0.201707	3.81594e-06	0.261524	1.8161e-11	0.0598175	0.652364	1.01212	0.953946	1.16852	0.640521	1.40418	0.255557
ENSG00000113048	MRPS27	43.1067	38.8446	38.4156	38.4321	-0.150284	2.59279e-07	-0.166084	8.82615e-05	-0.165839	1.32191e-05	0.000245649	1	0.78914	0.255417	1.14289	0.688432	0.663999	0.169296
ENSG00000113240	CLK4	43.7684	15.0642	14.379	15.2133	-1.53832	1.96127e-307	-1.60556	3.26222e-148	-1.52418	1.18625e-168	0.0813846	0.620089	0.66779	0.0539865	0.81034	0.529902	0.826068	0.521883
ENSG00000113272	THG1L	9.17689	11.5299	11.1047	11.535	0.327992	2.1751e-14	0.274011	7.16465e-06	0.32831	1.84072e-09	0.0542997	0.886304	0.915288	0.671166	1.10282	0.768958	0.826039	0.521808
ENSG00000113300	CNOT6	19.6408	27.8028	28.2935	27.3675	0.50183	5.86093e-58	0.526607	2.8955e-34	0.479243	5.30649e-34	-0.047367	0.808922	1.44028	0.0802918	1.04964	0.884426	1.09826	0.753221
ENSG00000113360	DROSHA	38.34	35.6397	34.6667	33.9304	-0.10563	0.000293561	-0.145506	0.000308985	-0.176262	8.95482e-07	-0.0307565	0.9203	0.861716	0.475386	1.1494	0.677807	0.710102	0.248666
ENSG00000113387	SUB1	43.4534	82.1357	78.7972	81.4565	0.918244	3.83821e-188	0.858529	3.13083e-92	0.906241	7.96596e-123	0.0477112	0.810626	0.883949	0.554717	0.913021	0.78609	0.672614	0.180705
ENSG00000113407	TARS	57.4502	59.1788	59.5564	55.5115	0.0428919	0.429159	0.0521276	0.535485	-0.0493325	0.512983	-0.101461	0.55794	1.18677	0.416423	1.391	0.322952	1.02127	0.944859
ENSG00000113460	BRIX1	9.89282	19.6815	20.0092	19.1335	0.991702	6.44304e-174	1.01584	1.72788e-102	0.951009	3.23398e-106	-0.0648379	0.701576	1.18361	0.420052	1.24291	0.51398	1.17628	0.586483
ENSG00000113593	PPWD1	23.19	15.6833	14.9888	15.9181	-0.56396	1.06153e-72	-0.629203	1.05007e-43	-0.542694	1.29625e-40	0.0865142	0.369805	0.613624	0.0198352	0.77897	0.455278	0.575795	0.066182
ENSG00000113643	RARS	47.0614	44.9028	46.0397	44.0374	-0.0678723	0.044936	-0.0317215	0.606567	-0.0959439	0.0290937	-0.0642232	0.627684	1.29705	0.213696	0.954773	0.889733	1.02323	0.938993
ENSG00000113649	TCERG1	45.1823	36.2349	36.6412	37.1476	-0.318208	3.08086e-20	-0.302199	1.36242e-09	-0.282375	3.12608e-10	0.0198247	1	1.14136	0.52581	0.87135	0.681144	0.893088	0.704421
ENSG00000113658	SMAD5	39.9338	40.2208	37.0489	39.0557	0.0107341	0.868482	-0.107788	0.0464984	-0.0316512	0.600381	0.0761381	0.575502	0.902617	0.623099	0.837817	0.597312	0.848051	0.580061
ENSG00000113742	CPEB4	56.2877	30.275	27.1974	28.9509	-0.894413	4.19556e-51	-1.04912	1.20726e-33	-0.958923	2.76879e-35	0.0902055	0.792097	0.89677	0.601204	1.10425	0.766342	1.08932	0.774136
ENSG00000113761	ZNF346	10.7012	8.39558	7.98273	7.92287	-0.349627	5.34278e-30	-0.422419	3.16894e-24	-0.433632	6.38954e-31	-0.0112114	1	0.57676	0.00876566	0.544985	0.0714131	1.2625	0.433391
ENSG00000114127	XRN1	37.5457	30.8261	31.729	30.4664	-0.283922	1.38656e-11	-0.242511	8.69876e-05	-0.300757	4.66215e-08	-0.0582464	0.836828	1.448	0.0759098	1.64966	0.129747	1.30501	0.373473
ENSG00000114391	RPL24	501.078	360.34	354.175	348.594	-0.475734	8.13129e-24	-0.500574	3.39208e-13	-0.523553	2.43503e-17	-0.0229783	1	1.28594	0.227538	0.820115	0.553705	1.17435	0.591757
ENSG00000114416	FXR1	73.9917	71.6901	82.2671	64.2975	-0.0455959	0.208795	0.152931	0.000707054	-0.202647	7.9238e-07	-0.355582	4.84833e-10	1.34417	0.158092	2.10701	0.0279582	0.895858	0.715442
ENSG00000114503	NCBP2	36.6864	52.1043	55.0006	50.0951	0.506015	2.40325e-92	0.584104	2.43243e-67	0.449289	1.13689e-47	-0.134818	0.0125615	1.97317	0.00112068	2.12197	0.0242676	1.34407	0.329398
ENSG00000114686	MRPL3	47.6911	46.6583	49.2516	45.2356	-0.031574	0.414676	0.0465348	0.414553	-0.0762406	0.102413	-0.122777	0.142778	2.39959	3.23239e-05	2.17478	0.019801	1.29436	0.391305
ENSG00000114767	RRP9	12.5356	18.4672	18.8193	18.518	0.558419	5.93027e-38	0.58612	1.14093e-22	0.562534	6.13276e-25	-0.023589	1	1.31952	0.183873	0.975081	0.939746	1.2479	0.457678
ENSG00000114784	EIF1B	29.3777	30.1348	28.7613	29.7951	0.0366626	0.340803	-0.0306639	0.645917	0.0202421	0.750262	0.0509071	0.806	0.662248	0.047855	0.48124	0.0287203	0.923057	0.788276
ENSG00000114867	EIF4G1	341.936	276.915	302.484	260.515	-0.304252	1.40136e-18	-0.176846	0.000445543	-0.39231	1.06436e-18	-0.215464	0.00202596	1.70853	0.0104667	1.40557	0.307774	0.742817	0.317009
ENSG00000114942	EEF1B2	653.197	221.546	212.373	222.374	-1.55998	1.06644e-186	-1.6209	3.10064e-89	-1.5546	2.05744e-103	0.066302	0.879143	0.952808	0.816687	0.768787	0.4296	0.945341	0.850475
ENSG00000115053	NCL	406.895	378.69	398.895	368.892	-0.103643	0.00785254	-0.028648	0.722743	-0.141461	0.00513074	-0.112813	0.299782	1.17017	0.452305	1.13538	0.703519	0.807164	0.472562
ENSG00000115128	SF3B6	21.7066	38.9237	41.7242	38.1463	0.841859	2.18541e-134	0.942239	9.38315e-96	0.81273	4.22428e-84	-0.129513	0.137529	1.54137	0.038136	1.08319	0.811639	1.69387	0.0797621
ENSG00000115211	EIF2B4	44.2705	26.6222	26.6471	26.456	-0.734246	1.56487e-112	-0.732614	3.88835e-53	-0.743176	4.15253e-67	-0.0105615	1	0.842935	0.413739	0.554466	0.0767443	0.952287	0.870023
ENSG00000115267	IFIH1	14.3923	25.0886	26.4738	25.6067	0.801676	6.7167e-50	0.879072	7.54283e-34	0.831236	6.78329e-36	-0.0478408	1	1.60012	0.0245296	1.63612	0.138153	0.765781	0.369447
ENSG00000115268	RPS15	390.72	224.661	198.2	220.116	-0.798462	4.06682e-46	-0.979177	2.48518e-33	-0.827936	2.75641e-30	0.151241	0.368288	0.814478	0.325227	1.23366	0.528604	0.990716	0.975097
ENSG00000115364	MRPL19	16.2925	19.475	19.7029	19.5869	0.257515	1.19665e-16	0.274382	3.26065e-10	0.265595	1.90353e-11	-0.00878729	1	1.89064	0.00255877	1.72481	0.106467	1.27286	0.422953
ENSG00000115421	PAPOLG	11.4041	12.243	12.701	11.9056	0.10316	0.0021861	0.155224	0.00095878	0.0629838	0.179046	-0.0922459	0.342662	1.15303	0.494411	0.609432	0.143362	1.07821	0.800987
ENSG00000115524	SF3B1	415.545	224.41	235.756	224.785	-0.888796	7.65557e-187	-0.817691	1.00895e-76	-0.886369	5.10167e-110	-0.0686776	0.523623	1.15941	0.477704	0.785822	0.469246	1.05653	0.853696
ENSG00000115677	HDLBP	1033.49	513.335	532.185	494.799	-1.00956	5.29804e-125	-0.95752	1.05589e-52	-1.06262	9.31951e-79	-0.105099	0.452981	1.30441	0.203846	1.90563	0.0586674	0.789992	0.430934
ENSG00000115761	NOL10	21.7686	21.2791	21.9878	21.0708	-0.0330831	0.359967	0.0145348	0.874822	-0.0471212	0.319299	-0.0616578	0.6429	1.64756	0.0167886	1.18821	0.60671	1.53504	0.152481
ENSG00000115816	CEBPZ	21.9279	31.7291	32.104	31.6851	0.532993	6.02069e-48	0.549905	1.73648e-27	0.531007	1.1967e-30	-0.0188993	1	1.60576	0.0239683	1.01774	0.957938	1.32115	0.351678
ENSG00000115866	DARS	48.152	51.4041	57.7604	48.8506	0.0942593	0.0104323	0.262357	4.99335e-08	0.0208134	0.750885	-0.241547	0.000417052	1.75813	0.00743902	2.4537	0.00866802	1.09356	0.764628
ENSG00000115875	SRSF7	92.269	69.7421	71.4669	71.6148	-0.403798	5.25236e-35	-0.368528	3.62939e-15	-0.365619	4.18269e-18	0.00290948	1	1.062	0.773141	0.795029	0.49311	0.854466	0.598264
ENSG00000115946	PNO1	12.1841	14.6784	15.2595	14.233	0.268658	6.92416e-12	0.324849	3.00153e-09	0.224102	9.35777e-06	-0.100752	0.434999	1.32825	0.173585	1.42476	0.286463	1.23758	0.479203
ENSG00000116001	TIA1	86.1393	51.5951	53.6559	52.2165	-0.739366	2.85167e-81	-0.682942	6.07055e-34	-0.722109	3.51549e-46	-0.0391665	0.953283	0.799851	0.290548	0.548215	0.0743002	0.725034	0.284649
ENSG00000116120	FARSB	30.6296	33.0093	33.4389	32.7826	0.107789	0.00520006	0.12667	0.0234506	0.0979325	0.0564767	-0.0287378	1	1.50504	0.05102	1.52565	0.208083	1.58015	0.126231
ENSG00000116221	MRPL37	52.2289	43.0272	45.0682	41.4696	-0.279855	4.29094e-11	-0.212829	0.000684464	-0.333051	1.83916e-09	-0.120223	0.34575	1.12787	0.565131	1.12249	0.730333	0.923816	0.7904
ENSG00000116251	RPL22	240.061	186.246	184.846	184.267	-0.366253	1.80153e-26	-0.37706	4.74535e-14	-0.381702	2.1928e-17	-0.00464194	1	0.957951	0.836762	0.992373	0.981674	0.85885	0.609541
ENSG00000116288	PARK7	107.825	114.408	112.581	110.206	0.0854599	0.0122598	0.0623483	0.233649	0.0314265	0.557502	-0.030922	0.977131	1.03298	0.876344	1.1641	0.648699	0.916335	0.76946
ENSG00000116350	SRSF4	88.6733	70.1524	72.9085	70.7712	-0.337855	3.96012e-35	-0.28237	4.74515e-13	-0.325167	2.08547e-20	-0.0427976	0.782022	1.12823	0.562987	0.644509	0.19525	0.771408	0.385638
ENSG00000116539	ASH1L	62.2927	57.0891	53.1015	59.5817	-0.125629	0.00259774	-0.230098	0.000106881	-0.0640104	0.287928	0.16609	0.0892004	1.14383	0.519837	1.52907	0.20209	1.11922	0.706079
ENSG00000116560	SFPQ	275.077	150.149	147.066	151.952	-0.873419	4.92328e-210	-0.903354	1.37746e-103	-0.856216	7.39854e-116	0.0471384	0.751898	0.722032	0.121004	0.635544	0.181157	0.714696	0.260619
ENSG00000116668	SWT1	15.2577	4.46038	4.12202	4.64203	-1.77387	0	-1.88691	5.1541e-224	-1.71502	2.37712e-237	0.171932	0.0507251	0.957357	0.834592	1.27805	0.463378	0.766269	0.370599
ENSG00000116698	SMG7	66.714	75.6404	73.2008	79.3778	0.181099	5.84184e-11	0.133802	0.000775124	0.250761	4.96524e-13	0.11696	0.0749818	0.992947	0.972926	1.05722	0.867613	0.817806	0.499307
ENSG00000116747	TROVE2	17.6444	21.7299	22.3498	21.9126	0.301001	2.93918e-16	0.34132	2.70792e-11	0.313112	1.90649e-11	-0.0282099	1	1.40586	0.102704	0.986545	0.967583	1.17112	0.59814
ENSG00000116754	SRSF11	281.221	94.5573	95.4457	95.0563	-1.57232	0	-1.55892	3.5085e-176	-1.56473	2.3389e-221	-0.00581435	1	1.1475	0.509118	0.764995	0.42309	1.13327	0.67463
ENSG00000116791	CRYZ	69.5244	45.076	46.1091	46.9672	-0.625053	1.91847e-30	-0.592394	8.53674e-14	-0.565791	1.93052e-15	0.0266044	1	1.34894	0.15314	0.598239	0.124415	1.35256	0.319125
ENSG00000116830	TTF2	12.9064	11.155	12.1375	10.9743	-0.209944	1.35418e-05	-0.0888897	0.254837	-0.232981	0.000190084	-0.144098	0.280435	1.15649	0.485671	0.713556	0.312018	0.942504	0.842887
ENSG00000116874	WARS2	13.935	10.8009	10.4333	11.087	-0.367925	7.73128e-14	-0.417521	6.08316e-09	-0.330456	3.30874e-07	0.0870723	0.71102	1.28747	0.226114	1.16783	0.641279	0.880248	0.668647
ENSG00000116898	MRPS15	35.1407	34.21	34.6322	32.9644	-0.0392084	0.361343	-0.0211081	0.828705	-0.0928601	0.0751756	-0.0717532	0.656605	0.992842	0.972516	1.02513	0.940741	1.05465	0.858381
ENSG00000116918	TSNAX	18.5629	23.0969	21.8749	23.5716	0.315165	3.66292e-23	0.237096	1.34414e-07	0.344508	7.07073e-18	0.107414	0.215056	0.786818	0.249524	1.11461	0.744664	0.686535	0.205479
ENSG00000117133	RPF1	16.4109	21.2564	20.8145	21.2989	0.372802	2.12736e-37	0.342439	4.66636e-17	0.37564	2.30446e-24	0.0332012	0.92379	1.49277	0.054505	1.04455	0.896119	1.44882	0.212076
ENSG00000117174	ZNHIT6	14.1436	15.7371	17.0492	15.1646	0.154799	2.59842e-06	0.269966	1.5846e-09	0.101498	0.0191782	-0.168475	0.0149849	1.30608	0.199419	1.03045	0.928301	0.870451	0.641488
ENSG00000117360	PRPF3	55.6275	32.9381	33.0396	33.867	-0.75606	6.01855e-77	-0.75152	2.4777e-36	-0.715909	8.59684e-41	0.0356128	1	0.826839	0.361551	0.945835	0.867508	0.628449	0.118219
ENSG00000117395	EBNA1BP2	27.5345	36.0845	36.6619	33.0629	0.38996	4.82792e-23	0.413065	1.34118e-14	0.263792	1.11168e-07	-0.149277	0.1267	1.28812	0.226173	0.81262	0.533529	1.11403	0.718756
ENSG00000117408	IPO13	25.2242	26.8663	26.0169	24.921	0.0912039	0.0126459	0.0448526	0.444633	-0.0171433	0.809799	-0.0619975	0.68177	0.573604	0.00727374	0.562128	0.0840669	0.714148	0.256682
ENSG00000117419	ERI3	29.0313	31.087	31.1183	28.7528	0.0985351	0.0027886	0.100313	0.0300126	-0.0142865	0.846497	-0.114602	0.143366	0.707388	0.096476	0.612639	0.14008	0.943847	0.846321
ENSG00000117450	PRDX1	60.1458	154.12	156.023	162.236	1.35735	6.658e-207	1.37505	6.04159e-127	1.43139	3.12663e-162	0.0563465	0.886631	1.33222	0.169995	1.72612	0.102083	0.931091	0.811846
ENSG00000117481	NSUN4	18.4753	16.9422	16.7404	16.8244	-0.124742	4.23139e-06	-0.142076	0.00029948	-0.135037	0.000133728	0.00704006	1	0.955591	0.82757	0.591899	0.120768	1.19664	0.547458
ENSG00000117569	PTBP2	15.1054	11.7032	11.7482	11.5446	-0.367872	1.44398e-19	-0.362702	9.88414e-10	-0.387776	3.48274e-13	-0.025074	1	0.68352	0.0696074	0.694442	0.278087	0.681368	0.198198
ENSG00000117593	DARS2	11.3302	16.7755	16.3695	17.6564	0.56584	5.11533e-39	0.530426	6.49469e-19	0.639807	1.51791e-32	0.109382	0.462128	1.1921	0.399782	1.16961	0.64009	0.800174	0.453809
ENSG00000117614	SYF2	41.1439	41.0559	40.9956	41.8946	-0.00329791	1	-0.0053969	1	0.0258797	0.695558	0.0312771	1	1.06028	0.778961	0.662202	0.215859	1.64233	0.103074
ENSG00000117751	PPP1R8	17.2471	26.5014	26.9528	25.6875	0.619656	1.64374e-112	0.643792	4.86815e-66	0.574744	7.8029e-63	-0.0690521	0.462128	1.02623	0.901208	0.740057	0.371419	1.19404	0.551531
ENSG00000117877	CD3EAP	2.02497	3.51217	4.09307	3.26353	0.792735	5.92544e-54	1.0137	9.54805e-52	0.687119	5.37539e-28	-0.32666	0.00148105	1.44221	0.0809199	1.57805	0.173465	0.854355	0.599419
ENSG00000118181	RPS25	498.098	335.971	339.076	335.572	-0.56813	3.2078e-43	-0.554812	4.04356e-20	-0.569862	9.17076e-26	-0.0150499	1	1.31237	0.191395	0.961373	0.906065	0.99176	0.977865
ENSG00000118197	DDX59	14.07	10.2156	9.99978	10.4752	-0.461527	9.82173e-48	-0.492637	9.8583e-27	-0.424885	8.02259e-25	0.0677586	0.591235	0.924835	0.707845	0.567918	0.0873749	0.768407	0.375656
ENSG00000118246	FASTKD2	18.9407	20.0887	20.8173	19.8684	0.0850549	0.0119488	0.13644	0.00400424	0.0691652	0.130601	-0.0672775	0.60259	1.37658	0.129562	0.862758	0.658068	0.952017	0.869791
ENSG00000119203	CPSF3	16.2518	24.5844	25.6688	23.7453	0.596448	1.31831e-69	0.658928	2.58017e-46	0.546638	4.4039e-38	-0.112296	0.234293	1.30538	0.203771	1.17531	0.629719	1.19751	0.549828
ENSG00000119285	HEATR1	36.2584	28.4856	29.6155	29.252	-0.34785	8.28713e-16	-0.291845	3.00771e-06	-0.309507	3.25984e-08	-0.0176613	1	1.48812	0.0564421	1.24485	0.5103	1.15807	0.624398
ENSG00000119314	PTBP3	48.0713	114.761	122.562	114.548	1.2552	1.59666e-198	1.35003	8.34114e-136	1.25255	8.92462e-137	-0.0974804	0.522278	1.94928	0.0017609	1.24744	0.508924	1.82929	0.0489673
ENSG00000119392	GLE1	16.8766	23.0242	22.8428	22.2804	0.447979	1.50276e-44	0.436635	3.61397e-23	0.400858	1.82577e-23	-0.0357803	0.924819	0.809507	0.310033	0.815658	0.540939	0.917461	0.772615
ENSG00000119446	RBM18	14.1426	21.8536	20.8404	21.1327	0.628334	7.11996e-86	0.559668	5.21736e-39	0.58016	3.70036e-50	0.0204911	1	0.98198	0.930767	0.987709	0.97045	1.2223	0.502699
ENSG00000119616	FCF1	17.4844	29.662	33.1894	27.6155	0.76253	4.2974e-149	0.924392	4.6279e-131	0.659527	4.13073e-78	-0.264873	1.02541e-06	1.81314	0.00434483	1.66607	0.126904	0.916298	0.769359
ENSG00000119705	SLIRP	14.2779	22.1557	21.123	22.2245	0.633249	1.60379e-49	0.564872	1.12115e-21	0.63755	8.25661e-33	0.0726772	0.751647	0.930707	0.730495	1.40807	0.302974	1.08815	0.777329
ENSG00000119707	RBM25	156.495	74.204	73.9043	76.4359	-1.07637	5.68825e-206	-1.08229	2.54441e-96	-1.03361	1.11859e-109	0.0486771	0.836187	1.01541	0.941543	0.85473	0.639447	0.787524	0.422047
ENSG00000119718	EIF2B2	15.6594	22.0947	22.7338	21.6997	0.496156	4.31004e-55	0.537268	9.31894e-35	0.470133	6.12571e-32	-0.0671384	0.601326	1.30714	0.198569	1.1004	0.77401	1.17372	0.592996
ENSG00000119812	FAM98A	23.3486	27.7773	28.3998	26.9638	0.250785	4.43044e-14	0.282715	1.25593e-09	0.207974	1.18186e-06	-0.0747435	0.54334	1.25362	0.277776	0.825357	0.566556	1.025	0.934007
ENSG00000119917	IFIT3	7.10165	32.1304	35.5683	33.4656	2.17708	2.37846e-154	2.32363	1.39949e-116	2.23579	3.38403e-123	-0.0878529	0.936075	1.4314	0.0849388	1.07056	0.837893	1.00702	0.981275
ENSG00000119922	IFIT2	3.42177	14.941	17.0315	14.639	2.12477	2.03261e-181	2.31342	1.06522e-140	2.09527	2.78267e-131	-0.21818	0.314713	1.34778	0.151684	1.68888	0.114014	0.727282	0.284522
ENSG00000119953	SMNDC1	18.5727	23.6102	24.3371	24.0199	0.346332	1.68616e-37	0.390022	4.93512e-26	0.371104	2.59709e-28	-0.0189203	1	1.65691	0.0155638	1.12144	0.73242	1.09134	0.769828
ENSG00000120158	RCL1	53.2353	7.71022	7.84032	7.52264	-2.78722	2.0334e-87	-2.76296	2.54592e-36	-2.82277	3.29121e-47	-0.059807	1	1.1892	0.405491	1.58689	0.164827	1.02908	0.923426
ENSG00000120333	MRPS14	20.9147	18.0607	16.6754	18.4726	-0.211923	7.05062e-15	-0.326161	1.17351e-17	-0.179452	2.29628e-07	0.146714	0.00980191	0.879519	0.538204	0.704528	0.293939	0.80412	0.463873
ENSG00000120658	ENOX1	1.11692	3.74591	3.81728	3.43052	1.74392	1.94669e-117	1.77119	4.13108e-74	1.61694	2.61111e-71	-0.154335	0.621253	0.829874	0.372264	0.559652	0.0898158	1.28105	0.405969
ENSG00000120662	MTRF1	16.3232	6.33019	5.64262	7.05848	-1.36582	4.54852e-196	-1.53151	6.75792e-114	-1.20882	9.23678e-93	0.322729	0.000222652	0.698006	0.0848408	0.769417	0.433194	0.781406	0.406981
ENSG00000120688	WBP4	9.80077	10.8386	10.434	10.616	0.145688	2.59505e-07	0.0903267	0.0284589	0.115668	0.00139142	0.0253425	0.99014	0.710964	0.100909	1.01505	0.964303	0.618547	0.105939
ENSG00000120693	SMAD9	3.70489	6.71959	4.87973	6.00056	0.858237	1.43348e-27	0.397138	0.000144384	0.695609	2.42386e-14	0.298497	0.101735	0.618017	0.0208676	0.50274	0.0432652	0.695154	0.220178
ENSG00000120699	EXOSC8	13.3624	14.3408	13.9634	14.5892	0.101413	0.003735	0.0634578	0.249341	0.126091	0.00499431	0.0626357	0.685592	0.961129	0.849227	1.0427	0.900178	0.865909	0.62895
ENSG00000120705	ETF1	70.4896	81.5266	86.2769	77.8477	0.209963	1.75365e-10	0.291644	1.64939e-10	0.14333	0.000854147	-0.148315	0.0500716	1.1124	0.609356	0.658463	0.213125	0.940888	0.83903
ENSG00000120727	PAIP2	21.0463	31.8708	30.5073	28.6501	0.59894	2.2069e-55	0.535809	5.84477e-28	0.445312	2.90894e-23	-0.0904995	0.451179	0.663541	0.0489347	0.843926	0.615279	0.841717	0.565237
ENSG00000120800	UTP20	26.1576	17.845	18.3759	16.4219	-0.551176	7.39551e-48	-0.509064	4.30061e-21	-0.670881	7.04984e-43	-0.161821	0.0626889	1.06461	0.764165	0.855716	0.640356	0.943666	0.845815
ENSG00000120948	TARDBP	113.085	72.587	73.4512	72.2555	-0.639498	1.69709e-195	-0.622365	1.84314e-89	-0.646123	4.21669e-118	-0.0237576	0.9264	1.01423	0.94601	0.769489	0.431212	0.902676	0.731737
ENSG00000121057	AKAP1	49.6655	63.6853	53.4537	71.3852	0.358812	1.94053e-15	0.106253	0.121852	0.523509	9.04975e-22	0.417259	6.79557e-07	1.09621	0.660127	0.809379	0.525646	0.998302	0.995479
ENSG00000121060	TRIM25	49.9528	30.5896	27.9302	31.1425	-0.707666	1.08327e-64	-0.838744	2.50519e-43	-0.681875	2.25056e-36	0.156873	0.12959	0.636339	0.0297516	0.57022	0.0922667	0.775272	0.394901
ENSG00000121274	PAPD5	14.4362	11.4534	11.8801	10.6712	-0.332939	2.02341e-19	-0.280574	1.19334e-07	-0.434929	5.53949e-20	-0.154362	0.0740461	1.12992	0.558604	1.98524	0.0386	0.65183	0.148958
ENSG00000121390	PSPC1	17.3353	22.7843	21.9735	23.047	0.393835	4.70802e-41	0.341628	7.89658e-17	0.410345	1.14582e-28	0.0687175	0.521469	0.829522	0.369359	0.914844	0.789398	0.845733	0.573774
ENSG00000121486	TRMT1L	12.244	15.8575	14.7247	16.5287	0.373218	2.05135e-28	0.266043	2.004e-08	0.433244	6.766e-25	0.167206	0.0275205	0.882245	0.548057	0.771775	0.438614	0.599397	0.0833314
ENSG00000121766	ZCCHC17	12.8739	19.5384	19.9998	18.6133	0.602151	3.44836e-108	0.635824	9.60238e-67	0.532168	8.63811e-56	-0.103662	0.132051	1.01665	0.93688	0.932306	0.833413	1.16306	0.612159
ENSG00000121774	KHDRBS1	68.1709	106.659	110.479	104.942	0.645543	7.24548e-149	0.696329	3.0942e-94	0.622135	1.17866e-89	-0.0741951	0.323678	1.34089	0.160484	1.18121	0.61748	1.25456	0.451443
ENSG00000122026	RPL21	567.355	193.808	179.729	181.87	-1.54971	2.49003e-165	-1.6584	2.82817e-87	-1.64146	5.76778e-107	0.016932	1	0.695396	0.0816101	0.908878	0.77465	0.608097	0.0938915
ENSG00000122033	MTIF3	29.3318	28.0835	24.6461	29.4391	-0.0631572	0.0942935	-0.251002	3.65496e-07	0.00491742	1	0.255926	0.000133756	0.737331	0.142459	0.866017	0.665797	0.902846	0.7317
ENSG00000122034	GTF3A	57.619	74.4607	70.7443	72.7013	0.369871	8.65253e-17	0.296245	2.17413e-06	0.335445	2.34898e-09	0.0392001	1	0.833104	0.380979	1.35187	0.364679	0.638817	0.130449
ENSG00000122068	FYTTD1	56.0006	44.9031	48.823	41.371	-0.318432	2.6596e-17	-0.197775	0.000299067	-0.436665	1.82707e-19	-0.238893	0.00153811	1.69423	0.0112113	1.50013	0.221288	1.08107	0.794146
ENSG00000122085	MTERF4	31.4052	17.6801	16.9366	17.3576	-0.828715	4.15034e-188	-0.89049	1.19985e-105	-0.855441	5.50811e-121	0.0350527	0.881768	0.555298	0.0050053	0.52644	0.0562513	0.613182	0.0996382
ENSG00000122140	MRPS2	26.2918	29.8335	28.4952	28.1118	0.181676	4.08889e-05	0.115919	0.0755679	0.0959202	0.10659	-0.0199992	1	1.004	0.984748	1.28558	0.452686	1.02822	0.925637
ENSG00000122257	RBBP6	51.9508	38.4242	38.0745	38.372	-0.434718	5.28485e-62	-0.448016	5.00326e-32	-0.43666	2.83242e-37	0.0113569	1	0.909931	0.650981	0.702665	0.290266	0.626521	0.115762
ENSG00000122299	ZC3H7A	55.7746	34.7359	33.0982	35.0499	-0.682809	1.24094e-132	-0.752525	8.44741e-77	-0.669844	4.95445e-76	0.0826832	0.310466	0.953651	0.819984	1.08269	0.81184	1.10946	0.727486
ENSG00000122406	RPL5	1119.13	572.744	572.785	540.224	-0.966444	3.84642e-122	-0.966305	3.75036e-58	-1.0508	8.80099e-84	-0.0844914	0.594491	0.835545	0.390031	1.1528	0.669901	0.867837	0.634268
ENSG00000122435	TRMT13	18.995	7.21261	7.26814	7.33876	-1.39578	1.40420531568131e-316	-1.38505	8.17737e-142	-1.37104	3.21075e-173	0.0140192	1	0.917899	0.682877	0.801912	0.509571	0.925126	0.794465
ENSG00000122566	HNRNPA2B1	551.833	449.019	459.106	446.639	-0.297442	2.37183e-28	-0.265398	1.23181e-11	-0.305106	4.59553e-18	-0.0397083	0.820693	1.30056	0.206353	0.944483	0.864136	0.925343	0.79507
ENSG00000122687	FTSJ2	11.8002	19.4321	19.1744	18.3884	0.719156	1.92686e-116	0.700268	1.81367e-63	0.639543	3.88902e-63	-0.0607302	0.649757	0.906323	0.637311	NA	NA	NA	NA
ENSG00000122729	ACO1	86.8251	43.9945	42.9926	43.9801	-0.980873	4.55264e-95	-1.0141	4.47537e-47	-0.981307	9.33451e-55	0.0327932	1	1.0593	0.78234	0.968651	0.923873	0.889493	0.694965
ENSG00000122870	BICC1	52.918	44.1121	52.1337	41.4656	-0.262583	0.000469039	-0.0215715	0.972653	-0.351861	0.000281323	-0.330294	0.0444717	1.14183	0.524529	1.17115	0.635709	0.770344	0.380262
ENSG00000122965	RBM19	38.3205	23.6997	23.1838	23.0631	-0.693284	3.51279e-104	-0.725178	2.89771e-55	-0.732658	2.69569e-69	-0.00747836	1	0.74629	0.161476	0.687347	0.264627	0.866563	0.631428
ENSG00000123064	DDX54	63.4447	54.5249	54.882	54.3356	-0.218777	1.11347e-06	-0.20929	0.00161231	-0.223776	0.000155757	-0.0144863	1	0.931259	0.733183	0.940824	0.855001	0.989236	0.971107
ENSG00000123136	DDX39A	22.8882	44.9346	45.9205	46.4022	0.97283	5.1122e-114	1.00424	4.28885e-69	1.01925	1.71135e-84	0.0150105	1	1.22067	0.338247	0.96973	0.92664	1.00087	0.997681
ENSG00000123154	WDR83	4.1626	5.88299	5.3005	5.82145	0.495873	9.34323e-34	0.347677	5.81866e-10	0.481221	7.094e-22	0.133553	0.222204	0.6644	0.0496617	0.574813	0.0971352	0.824789	0.518503
ENSG00000123200	ZC3H13	41.7836	48.684	47.7981	49.0906	0.220702	1.66232e-10	0.194117	8.97912e-05	0.232723	1.45071e-07	0.0386061	0.927422	1.09287	0.670376	0.842787	0.609655	1.00347	0.990748
ENSG00000123297	TSFM	12.7953	14.8741	14.1638	14.3928	0.216321	1.87155e-10	0.146604	0.00238464	0.168315	8.51115e-05	0.0217114	1	0.926569	0.714542	1.02302	0.945658	0.950751	0.865507
ENSG00000123352	SPATS2	17.2359	21.6796	22.0922	20.3245	0.331211	4.88645e-24	0.358118	1.31241e-15	0.238099	8.78713e-09	-0.120023	0.14609	1.0554	0.796367	1.68051	0.120468	1.10288	0.744004
ENSG00000123636	BAZ2B	39.3105	30.4542	29.1526	31.5873	-0.367954	7.97115e-23	-0.431106	2.02717e-15	-0.315209	1.09156e-10	0.115901	0.280789	0.976286	0.908385	0.655779	0.20862	1.13057	0.680494
ENSG00000123737	EXOSC9	14.907	15.1817	15.2101	14.7458	0.0257003	0.401012	0.0289387	0.547231	-0.0168616	0.752305	-0.0458022	0.734067	0.980204	0.923679	0.714366	0.317474	1.08418	0.786304
ENSG00000123908	AGO2	6.70073	43.4951	46.2897	41.8558	2.69781	0	2.78753	0	2.64238	0	-0.145164	0.299687	1.04652	0.827738	1.2068	0.572836	0.85456	0.599978
ENSG00000124193	SRSF6	251.127	96.9876	92.328	95.3659	-1.37254	0	-1.44355	1.41362e-189	-1.39689	1.0395e-222	0.0466576	0.82363	0.593401	0.0126741	0.53524	0.063149	0.684404	0.206245
ENSG00000124201	ZNFX1	27.5001	74.7803	79.2631	74.1012	1.44291	0	1.52678	1.78738e-226	1.4298	2.35834e-231	-0.0969737	0.421483	1.41319	0.0983983	1.62585	0.146533	1.08255	0.791426
ENSG00000124214	STAU1	91.5795	119.317	121.226	119.52	0.381727	2.24629e-34	0.404604	1.47178e-20	0.384208	3.01131e-22	-0.020396	1	1.41663	0.0982942	1.04646	0.8918	1.00081	0.997855
ENSG00000124228	DDX27	43.5411	53.0585	56.3465	51.433	0.285092	2.01966e-21	0.371897	2.40694e-19	0.240222	3.17876e-10	-0.131676	0.0620369	1.36698	0.133067	1.17268	0.632383	0.799523	0.452155
ENSG00000124279	FASTKD3	4.46421	5.28671	4.85215	5.1187	0.242979	3.37776e-12	0.11911	0.0157432	0.196186	4.38707e-06	0.0770827	0.517858	0.810069	0.311976	0.835692	0.594958	0.807157	0.471665
ENSG00000124374	PAIP2B	126.151	8.33231	5.29596	6.84242	-3.92064	2.32846e-202	-4.57417	4.80508e-119	-4.20526	4.11097e-134	0.36897	0.176623	0.834343	0.385442	1.6253	0.14682	0.722448	0.279284
ENSG00000124380	SNRNP27	9.03901	17.688	18.2039	17.5036	0.969125	1.22406e-240	1.01043	7.59305e-147	0.953817	7.80407e-155	-0.0566171	0.665114	1.02893	0.891228	0.61011	0.136697	1.18413	0.571197
ENSG00000124383	MPHOSPH10	25.3525	24.7867	25.1088	24.6335	-0.0325116	0.285038	-0.0138874	0.857375	-0.0414338	0.309839	-0.027547	0.955897	1.2872	0.225723	1.04429	0.897186	1.12238	0.700196
ENSG00000124541	RRP36	23.6448	24.3598	24.7238	23.6836	0.042565	0.240971	0.0644079	0.222413	0.00172348	1	-0.0626862	0.667133	1.06685	0.756267	1.00861	0.979599	0.833138	0.539869
ENSG00000124562	SNRPC	33.4829	39.2576	39.4437	38.6925	0.22913	8.34944e-11	0.236349	2.35366e-06	0.208133	4.81897e-06	-0.0282161	1	1.10981	0.617468	1.37009	0.343603	1.14801	0.645181
ENSG00000124571	XPO5	49.0486	32.0837	33.336	30.0739	-0.612284	2.14477e-65	-0.556969	3.82495e-27	-0.705591	1.65608e-51	-0.148624	0.0789526	1.13889	0.532914	1.21033	0.56628	1.05634	0.854437
ENSG00000124608	AARS2	15.3078	12.6994	12.4788	12.7013	-0.269426	5.00929e-17	-0.294965	2.1119e-10	-0.268927	1.20317e-10	0.0260414	1	0.780892	0.237175	0.841173	0.605642	0.68513	0.207531
ENSG00000124614	RPS10	564.301	110.642	101.584	111.796	-2.35068	0	-2.47374	2.1071e-168	-2.33571	1.03786e-192	0.138024	0.439195	1.09103	0.676053	1.14459	0.685156	0.831244	0.534812
ENSG00000124701	APOBEC2	7.37573	4.13361	4.04786	4.53879	-0.835377	2.22208e-09	-0.865321	4.10209e-05	-0.700895	0.000194911	0.164459	0.904061	1.06839	0.751223	0.953552	0.886529	0.790616	0.429737
ENSG00000124784	RIOK1	15.5512	13.7112	13.2436	13.63	-0.181358	1.47097e-07	-0.231287	2.99793e-06	-0.189992	2.21372e-05	0.0412981	0.897347	0.935887	0.751127	0.844251	0.613295	1.00525	0.985987
ENSG00000124787	RPP40	2.41266	2.70834	2.81992	2.57726	0.163606	0.0021397	0.223355	0.0030799	0.0915625	0.215543	-0.131827	0.450659	1.14144	0.52587	0.708956	0.302747	0.946765	0.854721
ENSG00000124788	ATXN1	29.7212	38.4486	41.3465	38.1101	0.371701	3.2935e-19	0.476476	4.29183e-17	0.358853	6.06207e-12	-0.117627	0.349973	1.25182	0.281439	0.659768	0.220504	0.992785	0.980744
ENSG00000124789	NUP153	34.3411	29.9796	29.4899	29.2387	-0.195654	6.46056e-07	-0.219547	0.000120979	-0.231788	5.72229e-06	-0.0122413	1	1.03334	0.875132	0.813198	0.540037	1.031	0.918466
ENSG00000124795	DEK	48.2724	69.2635	69.1749	70.2292	0.520823	4.8877e-49	0.518966	3.35697e-26	0.540772	5.84098e-34	0.0218056	1	1.57886	0.0295777	1.53905	0.198682	1.15932	0.623955
ENSG00000124802	EEF1E1	13.0961	6.09039	5.76143	6.23605	-1.10566	5.87652e-138	-1.18419	1.54642e-72	-1.07247	8.45528e-75	0.111741	0.432179	1.05623	0.793024	0.95438	0.888758	0.974562	0.931142
ENSG00000124831	LRRFIP1	53.6979	139.067	150.11	135.468	1.3728	3.24385e-206	1.48298	2.50648e-143	1.33499	4.72044e-135	-0.147997	0.239472	1.82794	0.00414888	1.34321	0.377292	1.44699	0.218259
ENSG00000125107	CNOT1	105.199	100.544	102.095	99.6689	-0.0651584	0.104356	-0.0431414	0.535485	-0.0777273	0.14779	-0.034586	0.985599	1.15383	0.493849	1.27108	0.473455	0.595375	0.0792663
ENSG00000125207	PIWIL1	0.0488317	1.12295	0.55505	1.37275	4.46027	3.86852e-83	3.44187	5.37576e-40	4.7457	1.38217e-80	1.30313	0.00452264	1.12065	0.5869	0.56652	0.0969624	1.8337	0.048045
ENSG00000125351	UPF3B	10.6199	10.6806	10.3124	10.914	0.00874365	0.889319	-0.0422978	0.468612	0.0401629	0.427682	0.0824656	0.44401	0.931847	0.734978	0.753458	0.394897	1.06238	0.839484
ENSG00000125352	RNF113A	11.37	11.6204	11.0458	11.9466	0.0305239	0.506375	-0.0417084	0.570484	0.0704092	0.207379	0.112124	0.340082	0.771289	0.21266	0.896255	0.743881	0.893398	0.705844
ENSG00000125445	MRPS7	26.9691	33.1731	33.0798	31.3611	0.298359	5.2457e-18	0.294547	6.44734e-10	0.217202	6.9975e-07	-0.0773473	0.538609	0.957023	0.83348	1.75207	0.0928237	1.0409	0.89434
ENSG00000125457	MIF4GD	15.5752	15.7922	15.0564	15.7964	0.0197565	0.693862	-0.0487073	0.474861	0.020092	0.789037	0.0688021	0.691347	0.648889	0.0373015	0.711272	0.3074	0.543621	0.0383114
ENSG00000125485	DDX31	14.2956	12.163	11.4924	11.7065	-0.233529	5.27687e-12	-0.315166	1.93038e-11	-0.288331	9.03283e-12	0.0268382	1	0.900713	0.615863	1.28206	0.457673	0.945335	0.85046
ENSG00000125651	GTF2F1	83.8215	68.8303	65.152	67.2215	-0.284428	3.65926e-17	-0.363576	2.7194e-14	-0.318556	1.27771e-13	0.0450206	0.848297	0.729644	0.131321	0.806564	0.518823	1.00198	0.994729
ENSG00000125676	THOC2	52.3848	40.1418	39.2928	40.5384	-0.383412	1.05394e-39	-0.414418	1.03636e-22	-0.369131	2.51205e-22	0.0452882	0.79887	1.1104	0.616109	1.24165	0.515961	1.12542	0.693519
ENSG00000125691	RPL23	523.141	447.931	450.534	434.437	-0.22397	3.2246e-07	-0.215564	0.000822513	-0.268105	2.79338e-06	-0.052541	0.896918	1.11286	0.608248	1.16903	0.639064	1.08633	0.783744
ENSG00000125743	SNRPD2	52.0281	96.5702	98.7459	91.3152	0.892019	1.79748e-89	0.924318	5.57259e-54	0.811312	3.20779e-49	-0.113007	0.457644	0.756229	0.180479	1.25922	0.488305	0.746451	0.325076
ENSG00000125755	SYMPK	62.5379	84.3148	86.7486	81.7394	0.430877	3.90664e-40	0.472014	9.20886e-26	0.386159	7.16958e-21	-0.0858564	0.423872	0.672097	0.0565419	1.14647	0.68152	0.58544	0.0726279
ENSG00000125835	SNRPB	46.1376	105.925	103.405	108.017	1.19888	1.04161e-159	1.16423	1.04274e-85	1.22712	6.5863e-113	0.0628947	0.845691	1.19741	0.387387	1.33668	0.383063	0.923708	0.790098
ENSG00000125844	RRBP1	1005.31	390.625	351.833	405.271	-1.36379	1.01097e-143	-1.51466	1.79124e-79	-1.31067	1.75167e-76	0.203991	0.111973	0.895013	0.594579	0.700268	0.289368	0.702967	0.235772
ENSG00000125870	SNRPB2	16.976	31.8858	31.2608	31.5241	0.908665	6.06953e-163	0.880331	4.75337e-85	0.892196	4.10425e-104	0.0118622	1	1.39925	0.108525	1.53077	0.200894	1.21239	0.522752
ENSG00000125901	MRPS26	27.6037	25.0832	21.1357	23.8382	-0.138505	0.00681593	-0.384957	7.87095e-09	-0.211866	0.000512537	0.173096	0.133563	0.751211	0.170248	1.03756	0.912471	0.8386	0.554513
ENSG00000125944	HNRNPR	69.4165	89.1084	92.5597	86.9748	0.360444	8.19977e-30	0.415191	4.85802e-21	0.3255	8.49002e-16	-0.0896916	0.365065	1.25148	0.281098	1.06025	0.860863	0.760493	0.357073
ENSG00000125970	RALY	69.5343	121.429	123.243	121.076	0.804135	4.74428e-125	0.825579	3.74354e-72	0.799976	1.21282e-80	-0.0256041	1	1.42506	0.0904465	1.15257	0.670345	0.94802	0.858203
ENSG00000125977	EIF2S2	70.2089	63.9654	65.8755	61.2148	-0.13435	0.000985389	-0.0917788	0.146883	-0.197748	0.000174279	-0.10597	0.397686	1.44207	0.0800495	1.62783	0.145505	1.15646	0.626322
ENSG00000126070	AGO3	24.6197	16.6459	17.1321	15.664	-0.563565	2.69733e-64	-0.522462	6.37552e-28	-0.651266	1.709e-51	-0.128807	0.111721	0.686257	0.0717323	0.641715	0.185834	1.17278	0.592641
ENSG00000126254	RBM42	33.7819	62.2748	62.2887	62.3828	0.882139	3.99469e-97	0.882565	1.23201e-53	0.884733	4.33348e-64	0.00216629	1	0.862677	0.478391	2.04369	0.0327248	0.681944	0.197413
ENSG00000126461	SCAF1	50.9541	66.4575	66.5586	65.4734	0.383095	1.40371e-24	0.385306	1.9646e-13	0.361638	3.35152e-14	-0.0236686	1	0.588162	0.0104634	0.844179	0.611458	0.63759	0.128779
ENSG00000126524	SBDS	59.3205	67.0642	65.6521	67.2819	0.177056	3.15121e-06	0.146324	0.00849023	0.18176	0.000214504	0.0354363	0.984437	0.972264	0.892791	0.811577	0.530988	1.17791	0.584787
ENSG00000126653	NSRP1	26.864	24.4658	25.0452	23.9606	-0.13483	3.07573e-05	-0.101109	0.0381393	-0.165021	8.75466e-05	-0.0639131	0.626999	0.978524	0.917094	0.755074	0.400708	0.933497	0.817819
ENSG00000126814	TRMT5	13.6135	12.4638	12.9366	11.9047	-0.127804	6.93504e-05	-0.07401	0.136261	-0.193972	2.23768e-06	-0.119968	0.122398	0.932534	0.737821	1.51122	0.215033	1.03178	0.916447
ENSG00000126945	HNRNPH2	54.03	64.3838	64.2547	62.7568	0.253094	1.10892e-18	0.250168	5.72068e-10	0.216153	4.12928e-09	-0.0340151	0.906251	0.859604	0.467701	1.0419	0.902143	0.788972	0.425642
ENSG00000126952	NXF5	0.0646578	0.0217179	0.0138656	0.013719	-1.46794	2.67824e-20	-2.01945	1.07198e-17	-2.03038	3.80572e-22	-0.00703224	1	0.651188	0.0412091	1.36156	0.352591	0.586001	0.0755178
ENSG00000127022	CANX	521.195	470.67	470.916	439.085	-0.147092	0.000625277	-0.146336	0.0199029	-0.247305	5.62752e-06	-0.10097	0.471314	1.5	0.0529811	2.18468	0.0190577	1.10456	0.740178
ENSG00000127054	CPSF3L	102.03	63.5064	62.613	64.3648	-0.684141	3.06069e-87	-0.704562	6.88403e-44	-0.664752	2.2081e-48	0.0398117	0.914776	0.85699	0.458877	NA	NA	NA	NA
ENSG00000127993	RBM48	12.0526	7.67129	7.39579	7.4718	-0.65086	1.23155e-73	-0.703711	2.88975e-42	-0.688607	7.48558e-50	0.0151095	1	0.58566	0.00956895	0.846127	0.616326	0.585032	0.0688722
ENSG00000128016	ZFP36	116.899	249.201	254.29	260.204	1.09203	7.17179e-33	1.12119	6.49834e-20	1.15436	8.91979e-25	0.0331714	1	1.06374	0.767426	0.636376	0.182441	1.01948	0.948715
ENSG00000128191	DGCR8	39.2246	22.9041	22.9408	22.2569	-0.776135	4.62868e-131	-0.77395	3.229e-62	-0.817371	7.22025e-85	-0.0434204	0.843166	0.672521	0.056941	0.624476	0.159821	0.796366	0.444165
ENSG00000128311	TST	36.9574	59.6598	41.2336	72.3965	0.690714	7.54911e-20	0.157948	0.171626	0.969931	1.71531e-27	0.811992	5.50384e-09	1.15955	0.478274	1.04761	0.889185	1.01975	0.947711
ENSG00000128394	APOBEC3F	1.95172	4.53513	4.44266	4.44364	1.21122	2.47572e-157	1.18177	2.07171e-85	1.18144	5.27687e-101	-0.000354915	1	0.824471	0.354903	0.609109	0.138464	1.0954	0.759876
ENSG00000128534	LSM8	23.9929	19.4185	19.3605	20.0514	-0.305457	7.84812e-26	-0.30931	1.08929e-13	-0.259113	5.26356e-12	0.0501989	0.72377	1.37017	0.130823	0.97571	0.941192	1.08734	0.779233
ENSG00000128626	MRPS12	15.44	22.8496	21.6998	22.6113	0.564848	4.39025e-27	0.490824	1.58528e-11	0.549942	6.12694e-17	0.0591183	0.927072	1.175	0.438894	1.29975	0.430954	0.728988	0.288109
ENSG00000128739	SNRPN	2.62611	35.8784	30.4153	32.5738	3.7719	0	3.53364	0	3.63236	0	0.0986985	0.795445	0.647415	0.0377963	0.790129	0.48148	0.566442	0.0583404
ENSG00000128829	EIF2AK4	27.4127	33.3985	35.2963	31.8563	0.285187	5.97843e-16	0.364801	7.20547e-14	0.217053	1.68471e-06	-0.147752	0.0797391	1.14635	0.512529	0.752858	0.395765	1.17349	0.593444
ENSG00000129084	PSMA1	47.0241	41.5879	44.6549	40.4355	-0.177359	2.63493e-08	-0.0744204	0.132491	-0.218098	9.52698e-08	-0.143679	0.0445543	1.25761	0.270724	1.31285	0.412715	1.11062	0.726424
ENSG00000129245	FXR2	25.1866	27.4909	24.4329	25.1377	0.126566	0.00036531	-0.0432634	0.396054	-0.002376	1	0.0408885	0.840585	0.534603	0.00275689	0.45018	0.0165341	0.599432	0.0890795
ENSG00000129315	CCNT1	33.8655	23.3215	22.2889	23.0281	-0.537541	4.50225e-61	-0.602976	8.77548e-38	-0.555822	8.99796e-40	0.0471574	0.823692	0.876185	0.525941	1.26512	0.479489	1.09703	0.75747
ENSG00000129317	PUS7L	6.3579	12.8996	12.0465	12.6137	1.02223	6.75378e-87	0.923593	1.30848e-40	0.98987	1.79102e-55	0.0662733	0.883886	0.960294	0.84596	1.97026	0.0408838	0.75192	0.337384
ENSG00000129351	ILF3	201.163	168.574	167.801	167.544	-0.254958	3.03204e-27	-0.261577	1.2817e-14	-0.263796	6.09536e-18	-0.00221898	1	0.869075	0.501014	0.877945	0.6964	1.02918	0.923156
ENSG00000129460	NGDN	17.8722	18.4715	18.3768	18.2386	0.0477129	0.108931	0.0406384	0.392215	0.0293405	0.509594	-0.0112984	1	1.0486	0.819982	1.2708	0.471807	1.19119	0.5577
ENSG00000129538	RNASE1	774.479	180.925	166.289	190.394	-2.09784	3.95242e-63	-2.21952	2.83898e-30	-2.02422	1.71141e-32	0.195295	0.761721	1.04307	0.83976	0.816166	0.544062	0.930795	0.809916
ENSG00000129566	TEP1	32.6989	49.9199	45.7181	56.9986	0.610276	2.53119e-42	0.483281	6.37468e-16	0.80159	1.93076e-51	0.318312	0.000280518	1.17448	0.440471	0.487717	0.0319045	0.9954	0.98769
ENSG00000129824	RPS4Y1	156.744	60.3244	49.9637	64.9072	-1.37758	1.80907e-06	-1.64941	0.000297655	-1.27195	0.00141861	0.37746	0.855768	0.824521	0.356888	0.852899	0.633286	0.626115	0.120465
ENSG00000130119	GNL3L	5.40615	6.95747	6.89915	6.88749	0.365206	2.96838e-15	0.352334	6.25237e-08	0.350835	2.82484e-09	-0.00150265	1	1.36313	0.13729	1.01945	0.953905	1.46659	0.197254
ENSG00000130227	XPO7	51.8152	49.6744	49.5275	48.0268	-0.0606218	0.0304516	-0.0649835	0.119232	-0.10915	0.00195685	-0.0441667	0.746779	1.11088	0.614654	1.15621	0.66345	1.19549	0.551183
ENSG00000130244	FAM98C	14.0584	16.4832	14.6747	17.589	0.229015	7.18831e-07	0.0615469	0.435922	0.322839	2.05963e-08	0.261302	0.00703541	0.621584	0.0224763	0.569933	0.0919672	1.09967	0.749952
ENSG00000130254	SAFB2	62.4367	45.9748	41.2457	45.6697	-0.441593	8.34838e-39	-0.598176	6.11072e-37	-0.451208	9.2474e-27	0.14697	0.0499762	0.499799	0.000985029	0.605351	0.133507	0.676011	0.195324
ENSG00000130255	RPL36	407.233	354.088	304.667	343.492	-0.201809	0.00197314	-0.418621	4.47044e-06	-0.245634	0.00323075	0.172988	0.362424	0.843284	0.413543	1.12237	0.729354	1.16593	0.607054
ENSG00000130299	GTPBP3	21.8882	11.9379	12.0687	11.8527	-0.875227	3.59204e-109	-0.859285	1.68728e-49	-0.885335	1.92101e-64	-0.0260482	1	0.670927	0.054931	1.06156	0.85774	0.699722	0.229615
ENSG00000130305	NSUN5	25.2481	21.0184	21.1081	21.3572	-0.265077	2.56821e-08	-0.258462	0.000215955	-0.241824	0.000117177	0.0166395	1	1.20564	0.369533	1.70246	0.108469	0.741971	0.318031
ENSG00000130312	MRPL34	23.8886	23.6158	20.5762	23.8027	-0.0168499	0.813626	-0.215289	0.00114659	-0.00549836	1	0.209797	0.038438	0.680601	0.0664887	0.766308	0.434892	0.863347	0.623968
ENSG00000130332	LSM7	13.3148	31.5721	26.471	32.6543	1.24503	8.40971e-111	0.991127	9.16054e-42	1.29375	2.45721e-85	0.302628	0.0122867	0.798748	0.281996	0.613162	0.148461	1.00382	0.989787
ENSG00000130348	QRSL1	13.0351	12.2025	11.0636	12.4598	-0.0950206	0.0110571	-0.235809	4.0428e-06	-0.0649496	0.203129	0.170869	0.0301719	0.691053	0.0764296	0.75735	0.405807	0.530708	0.0328112
ENSG00000130520	LSM4	29.5893	59.0216	58.1508	59.3121	0.995932	2.34913e-110	0.974634	5.45418e-59	1.00306	3.12474e-74	0.0284286	1	1.14677	0.511891	2.18523	0.0190172	1.03636	0.904843
ENSG00000130589	HELZ2	30.0304	54.7808	57.6779	57.0295	0.86704	2.04655e-44	0.941326	8.88971e-30	0.92512	4.86897e-34	-0.0162077	1	1.35302	0.145912	0.969737	0.926656	1.28926	0.393894
ENSG00000130713	EXOSC2	18.528	13.901	13.8776	13.4457	-0.414921	4.78547e-44	-0.41674	1.66642e-22	-0.462624	3.00025e-33	-0.045885	0.795726	0.945567	0.78854	0.960325	0.903328	0.801494	0.457166
ENSG00000130741	EIF2S3	146.435	116.036	120.199	117.514	-0.335661	2.17267e-23	-0.284791	4.41812e-09	-0.317396	3.29636e-13	-0.032605	0.969672	1.36367	0.136783	1.53603	0.200767	1.09555	0.760907
ENSG00000130749	ZC3H4	35.7415	31.5178	30.325	31.6957	-0.181616	1.12957e-08	-0.237404	2.09686e-07	-0.173277	2.94883e-05	0.0641284	0.622121	0.851601	0.440577	1.08582	0.805146	0.618117	0.104042
ENSG00000130764	LRRC47	58.2409	37.3136	36.0496	35.9462	-0.642401	2.44568e-90	-0.692065	3.56644e-52	-0.6962	7.52205e-65	-0.00413424	1	0.728155	0.128	0.571721	0.0938401	0.867183	0.634489
ENSG00000130810	PPAN	22.3619	4.70371	4.2122	4.72483	-2.2513	1.08719639433012e-318	-2.40813	3.31608e-157	-2.24416	1.60313e-175	0.164014	0.311077	0.690595	0.0776	1.15488	0.665969	0.886124	0.686772
ENSG00000130811	EIF3G	168.59	105.457	99.3164	105.662	-0.677033	9.74764e-61	-0.763435	8.36319e-37	-0.674233	6.17515e-36	0.0892021	0.567093	0.75916	0.187576	1.28138	0.456531	0.836495	0.551238
ENSG00000130816	DNMT1	23.6037	40.9434	41.987	39.4177	0.794465	2.30012e-112	0.83057	6.52066e-68	0.739806	6.13521e-64	-0.0907666	0.44621	1.14689	0.513174	2.16968	0.0201954	0.75745	0.350031
ENSG00000130826	DKC1	47.7559	42.1476	42.1021	41.1865	-0.180157	3.8033e-06	-0.181607	0.00150655	-0.213398	2.70705e-05	-0.0317914	1	1.16741	0.460107	1.39405	0.317465	0.963784	0.90272
ENSG00000130921	C12orf65	9.90171	13.6	12.6895	12.4909	0.457341	3.7137e-38	0.357181	3.36598e-15	0.334602	5.04444e-16	-0.0225815	1	0.675396	0.0596962	0.982438	0.957609	0.799289	0.451561
ENSG00000130935	NOL11	22.631	26.3807	26.5504	25.1319	0.22104	2.96994e-12	0.230396	1.8041e-07	0.151081	0.000217471	-0.0793175	0.446364	0.704263	0.0913229	0.947869	0.87238	0.524955	0.0298288
ENSG00000130956	HABP4	7.71668	14.4327	14.3601	12.2354	0.902479	8.70678e-102	0.894988	1.84507e-67	0.663944	7.9277e-44	-0.23106	0.0044686	0.595208	0.0126029	0.58021	0.100363	0.666974	0.172351
ENSG00000130985	UBA1	158.454	250.987	261.234	247.975	0.663508	1.09397e-143	0.721227	2.1221e-92	0.646114	2.57591e-88	-0.0751134	0.352878	1.24729	0.29114	0.692667	0.270915	1.35271	0.315
ENSG00000131013	PPIL4	16.3656	17.5021	17.5456	17.1419	0.097657	0.0035694	0.100834	0.0386817	0.0675778	0.141341	-0.0332575	0.948824	0.995773	0.983854	1.03514	0.917994	0.653005	0.158197
ENSG00000131043	AAR2	24.9613	34.0274	34.6098	32.6929	0.446483	3.42775e-54	0.47107	1.25137e-32	0.388781	7.97188e-27	-0.0822912	0.353283	0.954147	0.822256	0.769775	0.431158	0.906294	0.742833
ENSG00000131051	RBM39	233.567	145.701	142.695	146.967	-0.680813	1.37695e-122	-0.710908	7.73962e-63	-0.668318	7.25652e-69	0.0425902	0.820983	0.609076	0.0179981	0.648354	0.201464	0.68897	0.211645
ENSG00000131368	MRPS25	48.2984	24.3117	22.3207	25.2618	-0.990763	1.32232e-159	-1.11341	7.6517e-94	-0.935194	2.56829e-84	0.178224	0.027201	0.707552	0.0993609	0.639909	0.183008	0.76315	0.372926
ENSG00000131469	RPL27	379.645	382.288	375.336	380.454	0.00996471	0.917295	-0.0164632	0.938559	0.00301967	1	0.0194829	1	1.16125	0.473084	1.14743	0.679674	0.854986	0.598962
ENSG00000131503	ANKHD1	146.489	4.22071	3.98179	4.48999	-5.11643	0	-5.2	0	-5.0283	0	0.17174	0.0210835	1.10643	0.627585	0.667179	0.233329	1.02888	0.924087
ENSG00000131652	THOC6	10.2213	20.9238	21.4289	21.3454	1.03314	2.68475e-179	1.0679	2.30071e-109	1.06188	3.47336e-128	-0.00602526	1	1.05403	0.800938	1.04395	0.897485	1.04737	0.876886
ENSG00000131732	ZCCHC9	12.2001	13.1146	13.1059	13.4221	0.104145	0.000195827	0.103124	0.0105977	0.137101	0.000107794	0.0339781	0.887671	1.01729	0.934558	0.788559	0.475711	0.909557	0.75096
ENSG00000131773	KHDRBS3	5.80991	8.74444	7.87117	8.49931	0.589058	2.44196e-22	0.437714	1.9764e-07	0.547882	3.50704e-13	0.110172	0.698059	0.867417	0.495196	0.794086	0.488842	0.854518	0.598408
ENSG00000131876	SNRPA1	18.6927	20.3593	21.0226	20.6725	0.123028	0.0056396	0.169556	0.00700492	0.144876	0.0112575	-0.0246809	1	1.11113	0.613137	0.667727	0.229046	0.878778	0.665187
ENSG00000131914	LIN28A	0.0192331	0.0109815	0.00930484	0.0115792	-0.758593	0.000194655	-0.885645	0.00247133	-0.657677	0.0150536	0.242606	0.932042	0.813651	0.336037	0.483033	0.0397976	1.30198	0.377686
ENSG00000132109	TRIM21	9.61363	18.3667	18.8352	19.3285	0.933215	9.88301e-95	0.969409	3.26156e-59	1.00675	6.25061e-76	0.0373405	1	1.23417	0.312521	0.93979	0.852414	1.16593	0.607054
ENSG00000132153	DHX30	60.482	62.0881	60.8618	59.2432	0.0377972	0.199768	0.00907106	0.932908	-0.0297506	0.473492	-0.0388221	0.809872	0.638443	0.0319669	0.536486	0.0641684	0.882421	0.675297
ENSG00000132275	RRP8	15.8018	13.8626	12.9711	14.6851	-0.189477	1.661e-11	-0.284248	6.67947e-13	-0.106579	0.00403359	0.177678	0.00153409	0.919803	0.69015	0.646605	0.198625	0.798769	0.452941
ENSG00000132300	PTCD3	49.2361	31.1093	30.0088	31.4407	-0.661978	8.18198e-181	-0.713833	2.74124e-101	-0.64676	1.71745e-103	0.067075	0.324277	0.739893	0.150484	0.607982	0.136966	1.06436	0.834617
ENSG00000132313	MRPL35	21.1829	21.7799	20.9614	21.7632	0.0402279	0.149201	-0.0147387	0.81482	0.03914	0.298526	0.0538802	0.58454	1.03417	0.872027	1.13441	0.706743	0.96424	0.902806
ENSG00000132341	RAN	83.7165	142.56	147.905	134.86	0.76787	1.88417e-87	0.82099	2.12774e-55	0.687739	3.83695e-46	-0.133252	0.21088	1.26921	0.255858	1.34761	0.369753	1.27103	0.4295
ENSG00000132394	EEFSEC	13.6507	15.1452	15.3897	14.6123	0.148947	8.74101e-06	0.17286	0.000274333	0.0976503	0.029009	-0.0752132	0.534023	0.881898	0.547276	0.848286	0.621187	1.28599	0.39774
ENSG00000132463	GRSF1	77.4882	73.5702	68.9069	67.8747	-0.0748626	0.0621984	-0.169273	0.00117415	-0.191091	3.8805e-05	-0.0218174	1	1.10715	0.626603	1.36154	0.35561	1.35815	0.305643
ENSG00000132466	ANKRD17	95.1512	66.086	63.7831	63.834	-0.525601	9.49701e-53	-0.576828	1.07666e-31	-0.575561	1.2151e-38	0.00126732	1	1.341	0.160361	1.04382	0.897611	1.78233	0.0541316
ENSG00000132467	UTP3	16.2524	23.2944	23.5207	23.3892	0.518599	1.94137e-57	0.532734	1.28782e-32	0.524281	8.03939e-38	-0.00845462	1	1.16843	0.455328	0.542458	0.0692063	1.1764	0.589981
ENSG00000132478	UNK	33.8538	21.4391	20.2528	19.9539	-0.658962	5.96813e-72	-0.741013	3.19742e-48	-0.762551	1.55762e-62	-0.0215377	1	0.506514	0.00110972	0.843556	0.611565	0.418137	0.00342726
ENSG00000132485	ZRANB2	101.315	44.6552	45.3751	45.1415	-1.18172	1.14405e-239	-1.15875	7.23142e-106	-1.16611	7.1362e-133	-0.00736104	1	0.797961	0.285445	0.883138	0.710823	0.750593	0.34412
ENSG00000132507	EIF5A	146.04	203.438	200.999	192.418	0.478192	1.22608e-29	0.460835	2.27081e-15	0.397846	7.20365e-14	-0.0629891	0.814268	1.41773	0.094417	1.19777	0.588312	1.26994	0.424602
ENSG00000132541	HRSP12	11.5173	10.318	9.46672	10.6071	-0.158759	0.0051939	-0.282357	0.000501903	-0.119025	0.127792	0.163343	0.307383	0.937013	0.755049	NA	NA	NA	NA
ENSG00000132591	ERAL1	23.7047	30.4951	30.2434	29.5546	0.363122	5.56827e-39	0.351496	6.1758e-20	0.317908	1.07886e-19	-0.0335897	0.902493	0.85258	0.443969	1.64446	0.137123	0.835682	0.546678
ENSG00000132603	NIP7	10.9255	20.2884	22.1331	20.1039	0.89239	1.00107e-97	1.018	8.95199e-74	0.87912	7.94637e-65	-0.138884	0.238247	1.61771	0.0213337	1.37303	0.342557	1.13649	0.669535
ENSG00000132661	NXT1	6.83229	13.6104	13.4183	13.3156	0.993461	2.66314e-113	0.973671	5.09792e-61	0.961837	1.19386e-70	-0.011841	1	1.01496	0.943229	0.915809	0.793096	1.0257	0.932593
ENSG00000132676	DAP3	59.5491	64.5018	64.8281	66.6711	0.115122	0.000589191	0.122602	0.0108573	0.162838	0.00011592	0.0402361	0.89066	1.31959	0.185882	0.948781	0.874846	0.918713	0.778719
ENSG00000132740	IGHMBP2	19.7044	14.1817	13.6016	14.7116	-0.474452	6.32348e-40	-0.535045	9.20573e-25	-0.421382	1.71426e-19	0.113669	0.26332	0.614403	0.0187586	0.477787	0.0271187	0.75336	0.340659
ENSG00000132773	TOE1	6.27268	8.22943	7.59673	8.46508	0.390565	2.92177e-24	0.275363	3.69398e-07	0.431191	2.64525e-19	0.155837	0.0977296	0.727569	0.125947	0.567919	0.0935327	0.751234	0.33583
ENSG00000132819	RBM38	14.4091	24.54	21.9634	23.4771	0.767869	1.85881e-26	0.607946	7.73562e-10	0.704127	2.80758e-15	0.0961812	0.863416	0.90811	0.64376	0.710068	0.308787	0.70075	0.230633
ENSG00000132953	XPO4	26.1451	18.4129	17.6411	18.3956	-0.504926	7.00535e-56	-0.566781	2.01451e-34	-0.50617	3.98464e-34	0.0606151	0.670722	1.01526	0.942156	1.189	0.603632	1.05937	0.846935
ENSG00000132972	RNF17	0.105071	0.0581014	0.0256651	0.0851067	-0.834902	0.00854982	-1.93196	8.3271e-05	-0.301681	0.580754	1.65328	0.0141852	0.755968	0.178391	0.525451	0.0592025	0.999501	0.998667
ENSG00000133226	SRRM1	84.7399	57.1673	58.8959	56.7786	-0.567586	5.99565e-100	-0.524849	1.43749e-41	-0.577369	5.70569e-61	-0.0525193	0.64528	1.09601	0.66013	0.900688	0.753572	0.859282	0.611431
ENSG00000133606	MKRN1	96.5303	86.8633	85.0381	83.5294	-0.152243	1.23013e-05	-0.182837	0.000242915	-0.208613	2.67775e-06	-0.0257757	1	1.14809	0.51392	1.73268	0.108687	1.27352	0.430527
ENSG00000133704	IPO8	54.5584	39.9912	39.3763	39.1561	-0.44793	7.58983e-44	-0.470405	6.55849e-24	-0.478266	4.47197e-30	-0.00786087	1	0.891784	0.582611	1.06898	0.84136	0.928446	0.80335
ENSG00000133706	LARS	98.4738	70.7638	70.2898	68.6604	-0.476612	3.60987e-59	-0.486229	1.94615e-30	-0.520165	3.48372e-42	-0.0339359	0.91131	0.897836	0.605437	1.3923	0.319317	0.698018	0.226416
ENSG00000133773	CCDC59	11.9411	13.3364	13.202	13.4272	0.159145	1.61295e-06	0.145159	0.00251558	0.168253	7.84322e-05	0.0230945	1	1.02444	0.907817	0.649414	0.194613	1.28565	0.403894
ENSG00000133858	ZFC3H1	52.3172	31.3878	31.3436	32.7454	-0.736803	3.74182e-80	-0.738927	5.41847e-39	-0.675736	1.35705e-40	0.0631936	0.762515	0.854487	0.452001	0.407522	0.00747875	1.01305	0.965324
ENSG00000134001	EIF2S1	40.1151	46.3642	50.1293	44.6846	0.20884	3.14315e-09	0.321426	3.00481e-11	0.155624	0.00064165	-0.165805	0.0351207	1.86637	0.00299127	1.12268	0.728724	1.07186	0.817026
ENSG00000134030	CTIF	33.9055	36.3123	37.1561	33.9585	0.0989849	0.020475	0.132075	0.0293628	0.00226022	1	-0.129817	0.250054	0.627297	0.0257141	0.553317	0.0790108	0.587729	0.0730438
ENSG00000134056	MRPS36	10.3068	12.0556	11.2861	12.5782	0.22549	2.58869e-11	0.13111	0.00819129	0.286408	1.42368e-11	0.155304	0.0434228	0.900638	0.615581	0.912233	0.783124	1.07139	0.817109
ENSG00000134077	THUMPD3	16.4604	21.4496	21.757	20.5706	0.382202	2.32045e-40	0.402664	2.41502e-24	0.322162	6.16285e-19	-0.080506	0.361335	1.25902	0.272365	1.3962	0.321276	0.926922	0.799088
ENSG00000134186	PRPF38B	85.1449	42.6322	41.5643	44.4649	-0.997616	4.80547e-231	-1.03444	1.2734e-115	-0.936878	3.07422e-119	0.0975685	0.250733	1.0734	0.734095	0.603732	0.135769	0.966886	0.910088
ENSG00000134398	ERN2	2.15558	71.1867	44.9555	97.2963	5.0434	3.861e-143	4.38015	3.16135e-90	5.49404	1.10966e-145	1.11386	0.00402405	1.07701	0.722168	0.571736	0.0975849	1.73248	0.0652088
ENSG00000134419	RPS15A	567.067	289.836	285.042	287.822	-0.968334	4.11214e-103	-0.99232	3.13394e-50	-0.978408	1.89995e-60	0.0139116	1	1.1687	0.454215	0.990854	0.978043	0.961134	0.894243
ENSG00000134440	NARS	82.7883	79.4491	73.0747	76.9378	-0.0592451	0.121142	-0.179912	0.000312399	-0.105507	0.0226428	0.0744056	0.56293	1.06448	0.764592	1.76029	0.0875481	0.712545	0.25349
ENSG00000134453	RBM17	67.1073	51.6731	51.1501	52.0784	-0.377192	4.60293e-45	-0.391646	8.68355e-24	-0.365883	1.71342e-25	0.0257635	0.977033	0.95113	0.810481	0.65396	0.205596	0.915858	0.768127
ENSG00000134597	RBMX2	13.0184	14.2784	14.1367	14.1663	0.132375	3.20633e-05	0.118908	0.0105469	0.120759	0.00358658	0.00185056	1	0.84014	0.403025	0.941467	0.856607	1.05802	0.850278
ENSG00000134627	PIWIL4	13.2189	9.07274	7.40531	11.5053	-0.542857	1.21983e-18	-0.835887	1.66087e-23	-0.200168	0.00890798	0.635766	1.31544e-09	1.3336	0.16683	1.03208	0.924517	0.74807	0.331583
ENSG00000134644	PUM1	56.9536	72.0364	71.9069	71.1138	0.339114	2.4176e-32	0.336402	5.58344e-17	0.320584	1.63983e-18	-0.0158183	1	1.1881	0.409668	0.774514	0.442808	1.24181	0.467718
ENSG00000134684	YARS	78.9129	60.6849	63.1901	56.9187	-0.378835	1.16363e-12	-0.320419	4.10616e-05	-0.471226	1.32432e-11	-0.150808	0.342664	0.939745	0.765631	0.924502	0.813773	1.22207	0.503102
ENSG00000134697	GNL2	31.7044	42.1925	43.8051	41.4115	0.412164	4.34545e-37	0.466267	2.1632e-25	0.385245	5.7306e-21	-0.0810235	0.466626	1.52296	0.0445761	0.9574	0.896242	1.38307	0.280483
ENSG00000134698	AGO4	37.7492	19.7582	19.4243	20.1869	-0.933493	3.10062e-132	-0.958489	1.02547e-64	-0.902447	1.39864e-71	0.0560462	0.820442	0.868929	0.5005	0.440462	0.0136618	1.06544	0.83198
ENSG00000134744	ZCCHC11	36.123	18.0888	18.595	16.6254	-0.997174	5.39951e-117	-0.957588	3.2911e-52	-1.11872	1.05919e-85	-0.161137	0.126824	0.678394	0.062672	0.923141	0.810631	0.68889	0.209684
ENSG00000134748	PRPF38A	29.7872	29.0932	29.811	28.9456	-0.0338741	0.211593	0.001072	1	-0.0412416	0.254106	-0.0423144	0.727168	1.19505	0.392611	1.16645	0.644342	0.722465	0.274506
ENSG00000134815	DHX34	22.2657	18.0319	18.0385	18.0079	-0.30464	8.37512e-10	-0.303921	2.98889e-05	-0.306308	2.6754e-06	-0.00238675	1	0.678305	0.0620202	1.03849	0.909788	0.546604	0.0409355
ENSG00000134874	DZIP1	41.5198	19.1414	19.9375	17.6291	-1.11699	3.25646e-59	-1.05817	3.6763e-25	-1.2358	7.49509e-41	-0.177627	0.410283	0.702239	0.0921369	0.759333	0.410266	0.651166	0.152061
ENSG00000134905	CARS2	30.2408	34.0331	34.7864	33.5398	0.169946	6.91885e-06	0.201971	0.000172253	0.149061	0.00258341	-0.0529115	0.834397	0.842992	0.413924	0.992779	0.982682	0.981551	0.950308
ENSG00000134987	WDR36	24.4024	23.2058	23.8635	21.902	-0.0719884	0.0400793	-0.0318001	0.616084	-0.155399	0.000371054	-0.123602	0.135879	0.98592	0.945781	1.21574	0.557204	1.30423	0.371703
ENSG00000135097	MSI1	8.58159	4.45364	2.30297	2.15808	-0.945596	6.25728e-16	-1.89637	4.90771e-43	-1.99067	2.82515e-58	-0.0942913	0.932407	0.528767	0.00241674	0.663358	0.226671	0.522877	0.0301269
ENSG00000135114	OASL	0.510009	22.8246	23.6277	27.1058	5.47405	0	5.52305	4.62247493556169e-309	5.72134	0	0.198119	0.761785	1.77462	0.00602909	1.20282	0.579627	1.54988	0.140939
ENSG00000135250	SRPK2	19.12	25.4462	25.5014	23.3441	0.413107	3.62041e-37	0.416093	3.89653e-22	0.288999	3.21808e-13	-0.127098	0.0944054	0.877177	0.529787	1.34727	0.37239	0.698954	0.22817
ENSG00000135297	MTO1	15.3361	12.076	11.1682	12.1237	-0.344718	6.67912e-24	-0.457027	4.24631e-21	-0.339333	7.2234e-15	0.117702	0.182097	0.688963	0.0747872	0.771707	0.438458	0.69875	0.232457
ENSG00000135314	KHDC1	3.58614	1.65412	1.53223	1.69333	-1.11656	2.46728e-97	-1.22417	4.42236e-54	-1.08437	1.82842e-53	0.139885	0.402102	0.823469	0.352671	1.1118	0.750415	0.911964	0.757689
ENSG00000135316	SYNCRIP	98.4339	94.505	95.3348	93.3324	-0.0586451	0.0911174	-0.0460615	0.420991	-0.0766545	0.0939848	-0.0305931	0.980384	1.27374	0.244845	1.28497	0.450739	0.718085	0.267454
ENSG00000135372	NAT10	43.6264	38.7805	40.1943	38.9411	-0.169948	7.02502e-08	-0.118143	0.0115914	-0.164009	6.42757e-05	-0.0458663	0.816037	1.53924	0.0387663	1.31368	0.41452	1.1693	0.600299
ENSG00000135387	CAPRIN1	110.753	150.967	161.787	147.413	0.4469	3.59225e-40	0.546737	9.44282e-33	0.41254	1.4746e-22	-0.134197	0.10764	1.46928	0.0686338	1.44433	0.274107	0.995511	0.988107
ENSG00000135473	PAN2	112.247	25.6494	22.1628	25.4638	-2.1295	0	-2.34026	4.26796e-199	-2.13998	2.38896e-215	0.200295	0.0782476	0.704193	0.0937188	0.837978	0.596002	1.03507	0.908513
ENSG00000135482	ZC3H10	3.51465	6.60142	6.26607	6.15667	0.906479	3.96872e-114	0.831795	9.09719e-58	0.804912	2.09377e-64	-0.0268968	1	0.443843	9.31345e-05	0.426583	0.0114	0.531967	0.0317497
ENSG00000135486	HNRNPA1	607.591	376.146	370.335	380.781	-0.691824	3.23894e-71	-0.714274	5.61897e-36	-0.67416	1.11026e-39	0.0401138	0.951696	1.14532	0.515012	0.785919	0.469475	1.48685	0.183227
ENSG00000135698	MPHOSPH6	4.84695	10.2526	11.5257	9.7078	1.07978	2.05497e-147	1.2484	2.09607e-117	1.00082	1.06555e-87	-0.247602	0.00435064	1.11731	0.594905	1.05516	0.872222	0.774422	0.392855
ENSG00000135763	URB2	8.84236	9.33447	8.8601	9.52264	0.0784627	0.14731	0.00338911	1	0.107411	0.124864	0.104029	0.602651	1.16192	0.47222	1.4983	0.221986	0.778092	0.398905
ENSG00000135828	RNASEL	7.63325	16.4908	16.251	17.7995	1.11021	1.40849e-128	1.08892	1.41265e-72	1.22035	1.01479e-108	0.131425	0.351704	0.917996	0.681465	0.460445	0.0200297	0.901347	0.728025
ENSG00000135829	DHX9	88.4672	111.188	113.463	110.313	0.329845	4.62493e-30	0.359014	7.94923e-19	0.318483	6.55455e-18	-0.0405313	0.843265	1.06257	0.771192	1.00927	0.977911	0.764666	0.366823
ENSG00000135870	RC3H1	31.6676	24.3075	23.703	24.634	-0.38125	3.16912e-44	-0.417989	5.26204e-26	-0.362015	2.88407e-24	0.0559766	0.623405	0.813052	0.321099	0.673179	0.238684	0.793472	0.436884
ENSG00000135900	MRPL44	13.2677	19.2953	20.0356	19.2608	0.539411	6.31257e-59	0.593807	6.46659e-39	0.536774	4.6405e-38	-0.0570379	0.742908	0.960789	0.847895	0.7106	0.303791	0.824945	0.518087
ENSG00000135930	EIF4E2	30.3667	47.5157	48.6972	47.9412	0.645278	6.43353e-114	0.680836	3.17319e-69	0.65816	2.64464e-77	-0.0226778	1	1.23849	0.306941	0.930466	0.828789	0.843259	0.567076
ENSG00000135972	MRPS9	17.115	15.8661	15.8659	15.502	-0.110354	0.00168099	-0.109549	0.0346778	-0.14399	0.0015332	-0.0344416	0.959777	0.772816	0.216949	0.780447	0.456623	0.660458	0.163718
ENSG00000136104	RNASEH2B	19.2835	17.1217	16.4263	17.1419	-0.171817	4.45239e-06	-0.230992	1.73381e-05	-0.170202	0.000510421	0.0607926	0.754677	0.772545	0.215557	1.10852	0.757525	0.519411	0.0271466
ENSG00000136231	IGF2BP3	0.935311	5.42368	6.62383	5.31683	2.53138	4.32108e-43	2.81922	3.85974e-36	2.5026	4.02618e-32	-0.316731	0.722124	1.58856	0.0268677	1.29327	0.43984	1.00706	0.981287
ENSG00000136243	NUPL2	12.3735	14.6787	13.6581	14.665	0.24641	4.65948e-17	0.142649	0.000600777	0.244834	1.62092e-11	0.102189	0.172554	0.618917	0.0216737	0.705453	0.299573	0.715641	0.262515
ENSG00000136261	BZW2	32.9219	42.9057	44.43	43.5436	0.381919	3.61341e-16	0.432398	2.77063e-11	0.403228	9.09899e-12	-0.0291709	1	1.41067	0.101233	1.54396	0.195338	1.17141	0.596106
ENSG00000136270	TBRG4	28.3088	46.0744	43.5485	47.7749	0.702384	1.14215e-82	0.621207	2.03129e-35	0.754796	1.29994e-62	0.13359	0.168746	0.971957	0.891596	1.17905	0.621363	0.746478	0.325137
ENSG00000136271	DDX56	60.6672	52.5073	50.5483	51.8836	-0.208498	2.5815e-09	-0.26316	1.62253e-07	-0.225711	6.41128e-07	0.0374492	0.935061	0.823996	0.353463	1.29512	0.437295	1.01491	0.960486
ENSG00000136381	IREB2	37.8297	33.1476	32.5587	32.5813	-0.190117	2.0265e-08	-0.216211	1.02538e-05	-0.214933	1.02836e-06	0.00127856	1	1.02279	0.913941	1.25455	0.495366	0.772143	0.38456
ENSG00000136450	SRSF1	119.479	98.5751	98.206	100.417	-0.277353	4.73007e-21	-0.282727	3.70843e-11	-0.250663	7.58921e-11	0.0320635	0.935468	0.967193	0.873014	1.02102	0.950305	0.526359	0.030538
ENSG00000136522	MRPL47	8.98397	19.7415	20.0912	19.4474	1.13446	5.76391e-199	1.1603	7.1495e-118	1.11269	7.4343e-128	-0.0476146	0.892262	1.21062	0.359627	1.05052	0.882446	1.3483	0.320301
ENSG00000136527	TRA2B	62.9077	73.595	75.9689	72.1751	0.226444	3.53848e-16	0.272171	2.90877e-12	0.19837	2.99277e-08	-0.0738022	0.41118	1.10336	0.636987	0.875224	0.690892	0.774208	0.389515
ENSG00000136628	EPRS	112.98	95.6346	91.2777	96.3777	-0.240401	1.76636e-08	-0.307637	6.64211e-07	-0.229199	4.29473e-05	0.0784388	0.685595	1.25296	0.282587	1.50386	0.22422	0.726922	0.282815
ENSG00000136718	IMP4	47.434	41.2694	40.0371	41.9543	-0.201178	4.89989e-07	-0.244637	2.62529e-05	-0.177327	0.000813116	0.0673114	0.741558	1.28354	0.231034	1.17195	0.634235	0.87332	0.650075
ENSG00000136807	CDK9	64.3452	48.4416	46.9026	47.8217	-0.409761	9.97381e-36	-0.456229	6.18241e-22	-0.428372	9.09404e-24	0.0278578	1	0.663903	0.0498405	0.656501	0.209827	0.778046	0.399726
ENSG00000136875	PRPF4	20.6455	23.5118	24.3553	22.2049	0.187495	2.51088e-07	0.238251	2.59654e-06	0.105218	0.0308761	-0.133037	0.144252	1.40569	0.103737	0.934159	0.838067	1.16471	0.613081
ENSG00000136897	MRPL50	17.8864	18.4926	16.3278	19.1405	0.048266	0.207593	-0.131229	0.00942068	0.0980184	0.031595	0.229256	0.000742987	0.704897	0.093095	0.653015	0.204034	0.981742	0.950729
ENSG00000136937	NCBP1	31.2442	27.2735	27.0742	26.2089	-0.195725	2.18312e-12	-0.206428	1.92668e-07	-0.252722	1.07443e-12	-0.0462943	0.737806	0.903595	0.626698	0.668699	0.227086	1.05188	0.865573
ENSG00000136942	RPL35	503.165	346.169	333.736	328.78	-0.539607	8.43404e-23	-0.592319	1.10921e-13	-0.613961	1.01124e-17	-0.0216418	1	1.17749	0.434531	0.909758	0.776537	1.12655	0.691053
ENSG00000137040	RANBP6	19.2631	16.8787	16.6992	16.4882	-0.190065	1.05955e-06	-0.205557	0.000289334	-0.223721	9.97732e-06	-0.0181647	1	0.786249	0.249439	0.898754	0.750176	0.68211	0.197702
ENSG00000137054	POLR1E	29.8032	13.6408	14.0963	12.5872	-1.12814	1.8016e-113	-1.08022	2.0236e-49	-1.24423	7.25594e-79	-0.164017	0.210929	0.896528	0.601597	1.06125	0.858423	0.893421	0.705907
ENSG00000137073	UBAP2	32.7905	27.8011	26.4098	28.128	-0.237967	3.38174e-12	-0.312408	2.08294e-10	-0.220778	6.71296e-07	0.0916335	0.395051	1.22044	0.34146	1.31379	0.418059	0.950376	0.864465
ENSG00000137074	APTX	18.051	15.5981	15.6104	14.9696	-0.211581	1.60784e-09	-0.210255	3.19657e-05	-0.270614	1.91456e-09	-0.0603604	0.718616	0.711963	0.102334	0.63621	0.17189	0.852905	0.594007
ENSG00000137154	RPS6	1732.23	1055.04	955.945	1028.74	-0.715342	2.00267e-43	-0.857625	2.79898e-30	-0.751758	2.87167e-29	0.105867	0.599008	1.0794	0.713981	1.08441	0.807874	0.841494	0.56231
ENSG00000137200	CMTR1	53.6861	39.1084	37.8236	38.1773	-0.456552	8.63367e-63	-0.504792	1.6916e-38	-0.491213	9.23647e-45	0.01358	1	0.675911	0.062643	0.827277	0.578585	0.584587	0.0741748
ENSG00000137411	VARS2	38.8196	27.2794	28.5397	26.2026	-0.509208	1.57196e-33	-0.443952	5.05896e-13	-0.567327	1.28132e-24	-0.123378	0.322622	0.822334	0.348447	1.3115	0.414496	0.736327	0.303786
ENSG00000137449	CPEB2	15.073	15.8764	15.2648	16.4538	0.0753723	0.0973565	0.0183353	0.883189	0.126868	0.026639	0.108537	0.439658	1.03979	0.851694	0.603656	0.135669	1.11628	0.712086
ENSG00000137513	NARS2	10.5528	9.74946	9.80231	9.3317	-0.113346	0.000244812	-0.105784	0.0191924	-0.176192	6.77135e-06	-0.0704116	0.499505	1.13248	0.550582	2.04372	0.0308018	0.988822	0.969933
ENSG00000137547	MRPL15	14.7876	26.4996	29.4776	25.1321	0.840974	3.02988e-91	0.994842	2.05257e-73	0.764467	5.76593e-51	-0.230383	0.00998641	1.61747	0.0218521	0.938676	0.849627	1.06232	0.83965
ENSG00000137574	TGS1	11.2588	15.1209	15.0765	15.0222	0.425792	6.22714e-33	0.421491	1.93033e-17	0.416471	2.44877e-20	-0.0050227	1	1.37956	0.125582	0.91689	0.794566	0.876572	0.659072
ENSG00000137628	DDX60	7.90602	41.4377	43.4114	44.9478	2.38923	8.07245e-236	2.45625	1.48668e-169	2.5065	1.7107e-201	0.0502348	1	2.07412	0.000554416	1.71476	0.106401	1.56917	0.139474
ENSG00000137656	BUD13	13.4372	14.7181	15.1949	14.4717	0.131273	1.38682e-07	0.177293	3.55266e-07	0.107198	0.000945339	-0.0700986	0.343552	1.40444	0.10465	1.30728	0.422983	0.816491	0.495867
ENSG00000137760	ALKBH8	5.59461	6.85506	7.26854	6.62205	0.293709	2.15603e-16	0.377246	1.81392e-14	0.24419	9.00234e-08	-0.133071	0.136682	1.25152	0.282746	1.30178	0.428208	0.830086	0.534173
ENSG00000137776	SLTM	67.372	64.5645	62.3598	66.0753	-0.0610397	0.0149847	-0.111259	0.0016951	-0.0277029	0.464751	0.0835565	0.188861	0.894888	0.594899	0.768669	0.431481	0.865498	0.628498
ENSG00000137815	RTF1	35.6025	40.8414	42.1071	41.022	0.198542	2.11396e-14	0.242452	1.97827e-11	0.204925	5.08625e-10	-0.0375273	0.82456	1.4726	0.0627926	1.0944	0.786613	1.63484	0.0979205
ENSG00000137818	RPLP1	788.128	920.129	876.868	941.333	0.22339	1.50678e-05	0.15393	0.0455305	0.256257	0.000103091	0.102327	0.635873	0.914247	0.667412	1.4064	0.30467	0.760021	0.356929
ENSG00000137834	SMAD6	6.07156	11.7191	12.2383	12.5387	0.948806	1.12451e-46	1.01127	5.91137e-31	1.04643	3.42647e-39	0.0351533	1	1.53592	0.0403929	1.3048	0.423424	1.53067	0.158657
ENSG00000137876	RSL24D1	70.7874	53.7193	53.6876	54.3899	-0.398187	5.76827e-27	-0.398878	1.39625e-13	-0.380415	4.438e-15	0.0184629	1	1.33482	0.168209	1.00305	0.992719	1.05451	0.859554
ENSG00000137996	RTCA	28.0723	22.221	23.2615	21.4136	-0.337311	9.93928e-25	-0.271398	1.13182e-08	-0.390598	5.20266e-20	-0.119202	0.155786	1.18894	0.406088	1.20135	0.583895	1.21089	0.520455
ENSG00000138035	PNPT1	24.8253	19.1514	19.399	19.519	-0.373841	8.03805e-37	-0.355272	5.3089e-17	-0.346443	1.11921e-19	0.00883021	1	2.22994	0.000151243	1.86173	0.0647041	1.23264	0.487516
ENSG00000138050	THUMPD2	8.83501	8.28498	8.12235	9.00748	-0.0935119	0.00898785	-0.12125	0.0140159	0.0263111	0.624132	0.147572	0.0496555	1.16809	0.455729	0.778904	0.453018	1.11402	0.717171
ENSG00000138095	LRPPRC	101.326	82.7557	85.1063	79.9425	-0.292091	1.42649e-14	-0.251664	5.70171e-06	-0.341974	5.07982e-12	-0.0903107	0.493759	1.7271	0.0104221	1.58326	0.175147	1.29934	0.38813
ENSG00000138231	DBR1	11.0494	11.331	11.284	11.3841	0.036522	0.302147	0.0298133	0.612692	0.0435273	0.36101	0.0137146	1	1.08398	0.699487	0.91621	0.793161	0.90691	0.746032
ENSG00000138303	ASCC1	22.6718	18.2973	20.2799	17.3188	-0.309423	3.94025e-06	-0.161006	0.126904	-0.388691	9.6195e-06	-0.227692	0.190414	1.94763	0.0014799	1.8136	0.0772104	1.17188	0.595161
ENSG00000138326	RPS24	758.033	714.014	676.18	698.314	-0.0863369	0.122414	-0.16485	0.037107	-0.118409	0.103934	0.0464406	0.995722	0.953321	0.818693	0.744711	0.375558	0.809513	0.477741
ENSG00000138376	BARD1	4.60529	6.53568	6.90543	6.85569	0.504653	9.22174e-26	0.583245	1.00484e-19	0.574052	9.7548e-23	-0.00920091	1	1.41412	0.0968697	1.34366	0.37674	1.18824	0.563315
ENSG00000138382	METTL5	20.8459	18.7457	19.2935	18.7784	-0.1537	1.09109e-05	-0.111612	0.033138	-0.151197	0.000956064	-0.0395859	0.913444	1.62921	0.0194601	1.88249	0.0599246	1.28672	0.399479
ENSG00000138385	SSB	28.4062	62.4804	66.076	61.0042	1.1369	7.16993243052785e-316	1.21756	1.29792e-209	1.10237	1.93607e-201	-0.115192	0.132823	1.13563	0.541716	0.986079	0.966452	0.87175	0.645081
ENSG00000138399	FASTKD1	12.5072	10.6812	9.62683	11.1413	-0.227393	8.14039e-09	-0.377008	1.63241e-11	-0.166458	0.00122809	0.210564	0.0114562	0.760743	0.188741	0.700623	0.286265	0.724298	0.278297
ENSG00000138442	WDR12	13.7787	16.1514	16.8473	15.4694	0.229242	1.80176e-09	0.290012	4.96018e-08	0.166973	0.000789562	-0.123046	0.241747	1.22362	0.333323	0.893055	0.73423	0.7347	0.299321
ENSG00000138593	SECISBP2L	40.598	34.5356	33.8914	33.7783	-0.232843	6.15101e-10	-0.260214	1.78906e-06	-0.264844	6.03637e-08	-0.00463007	1	0.856692	0.458182	0.563623	0.0890994	0.905382	0.738797
ENSG00000138668	HNRNPD	140.3	141.776	144.576	145.369	0.0151276	0.627692	0.0433982	0.272686	0.0512091	0.132559	0.00781089	1	1.11599	0.598831	1.01155	0.972563	0.945063	0.849995
ENSG00000138709	LARP1B	68.1904	17.6364	15.8119	17.7541	-1.9508	0	-2.10831	1.71015e-177	-1.94108	2.37626e-193	0.16724	0.16227	1.1226	0.579761	1.37229	0.343381	1.45713	0.206838
ENSG00000138757	G3BP2	56.9399	99.615	95.4888	96.9099	0.806942	1.8812e-105	0.745881	1.05247e-50	0.767251	4.85284e-64	0.0213689	1	1.37951	0.123452	1.65734	0.127928	1.22353	0.498861
ENSG00000138767	CNOT6L	35.1888	34.6208	32.1074	33.2147	-0.023147	0.671101	-0.131876	0.0334483	-0.0829365	0.153931	0.0489408	0.900331	0.722971	0.118949	0.865494	0.666429	0.813973	0.489304
ENSG00000138785	INTS12	7.90625	12.0045	11.9293	11.8642	0.603118	1.15818e-117	0.594201	8.34115e-62	0.586053	4.9843e-72	-0.00815274	1	1.27692	0.24268	1.7767	0.088306	1.36644	0.294135
ENSG00000139131	YARS2	8.04106	11.5142	12.5758	10.9264	0.51754	4.91769e-46	0.645079	1.17753e-39	0.4419	1.85217e-22	-0.203193	0.00864508	1.50431	0.0494772	1.19864	0.586809	1.34505	0.3194
ENSG00000139168	ZCRB1	25.669	26.7255	26.2081	26.2089	0.0585963	0.129287	0.0306181	0.666383	0.0302642	0.62301	-0.000353976	1	1.0351	0.868697	2.22307	0.0180754	1.03444	0.90977
ENSG00000139218	SCAF11	49.6428	75.4726	71.7396	77.3826	0.604495	1.47444e-69	0.531274	3.02556e-29	0.640539	8.99584e-51	0.109265	0.274022	0.997016	0.988568	0.877959	0.697778	0.846413	0.575617
ENSG00000139343	SNRPF	12.1983	25.3954	24.6041	25.6697	1.057	9.72726e-117	1.01163	4.60026e-60	1.07238	2.96074e-80	0.0607475	0.875284	0.926138	0.713069	1.03566	0.916805	1.30546	0.370939
ENSG00000139546	TARBP2	20.5179	16.9897	16.562	16.6929	-0.273099	2.35277e-14	-0.30936	1.85069e-09	-0.298872	1.15965e-10	0.0104898	1	0.713887	0.106445	1.12338	0.726919	0.694277	0.221315
ENSG00000139675	HNRNPA1L2	4.45705	3.34453	3.35859	3.28098	-0.41434	5.17757e-28	-0.406892	8.47425e-14	-0.443014	2.36964e-19	-0.0361228	0.986483	0.539503	0.00306739	0.923391	0.811258	0.448038	0.00672904
ENSG00000139718	SETD1B	59.1963	31.9305	30.2503	31.5413	-0.890465	1.30438e-158	-0.968633	1.50732e-89	-0.908137	2.73162e-98	0.0604985	0.683172	0.711466	0.104927	0.58338	0.115954	1.11505	0.71486
ENSG00000139726	DENR	31.864	42.4177	43.1843	40.2392	0.412671	4.38113e-58	0.438518	3.67537e-36	0.336535	8.18641e-26	-0.101985	0.10494	1.03315	0.876162	1.43027	0.287219	1.03753	0.902258
ENSG00000139746	RBM26	64.2379	35.135	33.9838	35.4317	-0.870211	1.20353e-249	-0.918004	7.81073e-130	-0.858149	1.846e-141	0.0598577	0.51074	0.759105	0.187458	0.904193	0.762806	0.861385	0.618596
ENSG00000139767	SRRM4	0.0859582	0.37768	0.0358295	0.128519	2.11529	2.45777e-19	-1.19376	0.000168775	0.583203	0.0240238	1.7943	8.97845e-06	0.493153	0.000687563	0.716669	0.318359	0.388537	0.00142054
ENSG00000139793	MBNL2	81.9909	64.9526	67.0258	63.4017	-0.335962	7.1318e-10	-0.29067	0.000309886	-0.370827	2.26914e-07	-0.0801581	0.813655	1.57788	0.0304906	2.02191	0.0355432	1.47823	0.200798
ENSG00000139797	RNF113B	0.0407664	0.0105901	0.00987847	0.0123558	-1.75963	3.6737e-17	-1.84204	1.17425e-08	-1.54265	2.04328e-08	0.320132	0.909141	0.996074	0.985124	1.25045	0.50231	0.870975	0.646905
ENSG00000139910	NOVA1	2.75876	3.65596	2.05476	2.20631	0.40585	0.000479547	-0.423803	0.00384669	-0.321718	0.0154494	0.102125	0.943853	0.604133	0.0157731	0.969723	0.926623	0.519184	0.0261271
ENSG00000140105	WARS	58.0693	108.061	125.397	95.8123	0.896049	5.63975e-51	1.11069	3.90862e-45	0.722527	1.4398e-22	-0.388165	0.00159334	1.19128	0.401083	0.839172	0.600674	1.05399	0.860839
ENSG00000140319	SRP14	88.2825	138.703	138.073	140.25	0.651775	2.48221e-130	0.645242	2.96844e-68	0.667731	1.35387e-87	0.0224884	1	1.17465	0.440064	0.881829	0.707524	1.13308	0.675647
ENSG00000140395	WDR61	27.4769	28.5858	28.0123	28.0622	0.0572877	0.065889	0.0282243	0.610119	0.0304436	0.516389	0.00221926	1	0.98036	0.924285	1.21745	0.554363	0.751434	0.339165
ENSG00000140488	CELF6	8.60159	0.0262237	0.0223642	0.0262096	-8.22294	0	-8.45327	0	-8.22748	0	0.234825	0.711483	0.861695	0.477517	0.48924	0.0326877	1.11101	0.727132
ENSG00000140598	EFTUD1	11.3976	18.5663	17.1687	19.647	0.703741	4.34296e-69	0.590715	5.87505e-27	0.785478	6.36709e-57	0.194767	0.034872	1.14424	0.518717	NA	NA	NA	NA
ENSG00000140694	PARN	29.5182	40.3824	41.5871	40.6022	0.452249	2.01509e-63	0.494696	6.93e-41	0.46015	1.94672e-42	-0.0345477	0.881413	1.77505	0.00621935	1.35832	0.359335	1.34027	0.330143
ENSG00000140718	FTO	12.6571	33.2083	34.1786	30.7442	1.39173	2.39404e-289	1.43326	3.05296e-185	1.28046	5.26918e-172	-0.152808	0.105169	0.742054	0.154505	0.955017	0.890845	0.813265	0.492669
ENSG00000140829	DHX38	44.174	47.4623	49.8154	46.5128	0.103745	4.62791e-05	0.17344	8.15671e-07	0.0746901	0.0268893	-0.0987512	0.104099	1.25455	0.276768	1.13327	0.70723	0.93596	0.824337
ENSG00000140830	TXNL4B	10.1203	8.80959	8.68171	8.9567	-0.201722	2.62937e-07	-0.22263	9.5353e-05	-0.177714	0.000592701	0.0449204	0.911316	1.09392	0.667383	1.38149	0.337012	0.678189	0.19007
ENSG00000140939	NOL3	43.1605	25.4253	25.1276	26.9886	-0.763536	1.0086e-40	-0.780411	1.37783e-20	-0.677494	1.58438e-19	0.102921	0.697561	0.882697	0.549697	0.904866	0.764507	0.781019	0.406964
ENSG00000140948	ZCCHC14	46.6363	39.2376	41.2069	38.8856	-0.249025	3.4517e-13	-0.17844	0.000367832	-0.262027	3.48002e-09	-0.0835871	0.466379	0.943439	0.780495	0.863039	0.658778	0.869996	0.640891
ENSG00000140955	ADAD2	0.21896	0.149916	0.164986	0.128402	-0.554013	1.34267e-05	-0.418079	0.0326178	-0.778086	4.54113e-06	-0.36135	0.327206	0.808633	0.309281	0.752267	0.39817	0.743383	0.319219
ENSG00000140986	RPL3L	14.991	0.570265	0.291146	0.775077	-4.71224	7.73071e-68	-5.68121	1.67899e-35	-4.27038	1.19131e-30	1.41298	0.00344375	1.01757	0.93341	1.4551	0.26442	1.02113	0.944441
ENSG00000140988	RPS2	1497.36	621.282	608.117	628.477	-1.26912	6.9821e-122	-1.29999	7.36965e-58	-1.25251	3.64395e-67	0.0474814	0.998654	1.31918	0.183029	1.53086	0.200829	1.02415	0.936226
ENSG00000141101	NOB1	54.5388	35.31	36.8997	36.3215	-0.627354	3.77662e-31	-0.563716	6.91625e-13	-0.586645	8.79052e-17	-0.0229283	1	1.35323	0.146853	1.50291	0.224949	0.905413	0.738883
ENSG00000141378	PTRH2	11.0436	13.5431	13.384	13.7797	0.29343	2.77814e-10	0.277086	2.85181e-05	0.318227	7.92245e-08	0.0411416	1	0.887528	0.567038	0.956843	0.8947	0.540251	0.0370714
ENSG00000141499	WRAP53	6.61582	8.04238	7.24516	7.24043	0.279378	7.94756e-11	0.129965	0.024728	0.127716	0.0133951	-0.00225008	1	0.55798	0.00489821	0.60709	0.13092	0.537682	0.0403086
ENSG00000141543	EIF4A3	32.4309	51.8742	55.5383	48.6111	0.67743	7.10849e-65	0.775899	4.11232e-47	0.583712	8.98769e-32	-0.19219	0.035346	1.3083	0.198797	1.15107	0.673198	0.946131	0.853538
ENSG00000141642	ELAC1	7.84649	4.12236	3.40726	3.67958	-0.927694	7.32059e-74	-1.20106	1.42754e-73	-1.09243	1.64445e-76	0.108655	0.465395	0.745305	0.15799	0.836169	0.593228	0.734164	0.29817
ENSG00000141646	SMAD4	67.6256	38.3712	34.2424	36.0435	-0.817314	4.1036e-89	-0.981531	6.82739e-69	-0.907558	1.07881e-73	0.0739761	0.64513	0.655148	0.0417972	0.960879	0.904846	0.588364	0.0724987
ENSG00000141664	ZCCHC2	18.4841	13.9432	12.8106	14.4531	-0.405676	1.81053e-32	-0.528496	4.81534e-27	-0.353751	8.001e-16	0.174755	0.0193717	0.919556	0.687731	0.916133	0.79549	0.619442	0.105622
ENSG00000141759	TXNL4A	34.582	27.1502	23.9242	25.3719	-0.349322	6.67166e-16	-0.531329	3.86803e-20	-0.44723	6.90871e-18	0.0841028	0.587885	0.830613	0.372857	0.676727	0.24506	0.806292	0.470322
ENSG00000141994	DUS3L	31.8895	16.0286	14.416	16.5064	-0.993094	2.91769e-106	-1.1454	7.96411e-66	-0.950827	5.77822e-58	0.194583	0.061838	0.754182	0.178334	0.881213	0.705973	0.88652	0.687869
ENSG00000142207	URB1	34.5975	25.5148	26.8734	24.0386	-0.439064	7.39394e-25	-0.364215	4.09457e-09	-0.525077	4.30692e-21	-0.160865	0.131348	1.12835	0.562348	1.20333	0.578158	0.910027	0.7518
ENSG00000142252	GEMIN7	4.17676	9.51027	9.01777	9.75026	1.18447	8.38635e-165	1.10865	7.54466e-82	1.22034	3.00343e-118	0.111683	0.445383	0.695114	0.0830334	1.14537	0.683639	0.7655	0.374525
ENSG00000142528	ZNF473	6.9746	7.89779	7.41222	7.11398	0.178685	3.68649e-05	0.086782	0.163082	0.0284679	0.684679	-0.0583195	0.814579	0.751965	0.170138	1.30757	0.422595	0.487258	0.013961
ENSG00000142534	RPS11	855.781	856.036	813.142	845.728	0.000411807	1	-0.073729	0.339223	-0.0170652	0.894673	0.0566639	0.887751	0.801472	0.288578	0.954424	0.888867	0.883777	0.678462
ENSG00000142541	RPL13A	2459.43	1385.26	1302.15	1376.99	-0.828185	1.25562e-66	-0.917429	1.37391e-38	-0.836821	3.54207e-40	0.0806074	0.741295	0.756897	0.18187	1.04779	0.888616	0.792262	0.436589
ENSG00000142544	CTU1	4.68665	2.70811	2.47543	2.69373	-0.793485	8.31378e-28	-0.921048	8.61647e-18	-0.800279	5.89837e-17	0.120815	0.746383	0.730047	0.131175	0.593438	0.12266	0.981063	0.948983
ENSG00000142676	RPL11	782.928	554.862	549.374	545.495	-0.496777	3.28768e-33	-0.511083	2.771e-17	-0.521349	8.38403e-22	-0.0102659	1	0.970756	0.886832	0.966911	0.919588	0.848281	0.580687
ENSG00000142864	SERBP1	180.85	156.857	162.395	154.947	-0.205329	8.04159e-11	-0.155281	0.000858665	-0.223005	6.10141e-08	-0.0677244	0.575962	1.41077	0.0984787	1.18168	0.616644	0.840787	0.560403
ENSG00000142937	RPS8	1062.4	697.253	704.597	674.866	-0.607594	4.17321e-44	-0.59245	1.5204e-20	-0.654684	4.12337e-30	-0.0622345	0.827037	1.38541	0.117721	1.43173	0.282047	0.89975	0.723039
ENSG00000143194	MAEL	0.105595	0.388483	0.364237	0.429089	1.87907	1.00061e-48	1.78496	9.76278e-27	2.01945	3.51264e-40	0.234225	0.686691	1.16602	0.462609	0.68472	0.255973	1.13949	0.661882
ENSG00000143303	RRNAD1	27.9734	24.4799	21.7579	26.4152	-0.192771	8.40611e-08	-0.362389	6.0461e-13	-0.0829986	0.0903488	0.279398	3.74493e-05	0.864938	0.486235	1.2707	0.471955	0.623239	0.113825
ENSG00000143314	MRPL24	43.2777	44.0703	39.1675	46.1019	0.025796	0.696823	-0.143925	0.0615347	0.0909116	0.197385	0.23484	0.0368382	1.07106	0.742178	1.15426	0.667142	1.03878	0.89907
ENSG00000143319	ISG20L2	22.4464	32.3322	31.4965	34.0872	0.526362	3.42913e-69	0.488761	6.10495e-33	0.602601	5.54016e-60	0.11384	0.134776	1.12157	0.584201	1.08308	0.811006	0.80906	0.481845
ENSG00000143368	SF3B4	33.5168	61.0424	60.8978	65.0468	0.864578	1.97699e-112	0.861234	2.77528e-64	0.956253	8.36699e-95	0.095019	0.468429	1.03024	0.886389	0.955932	0.892606	0.878618	0.664119
ENSG00000143374	TARS2	17.4316	23.4775	22.1434	25.0843	0.429197	2.68057e-43	0.345116	8.60581e-16	0.52484	9.35171e-43	0.179727	0.00633336	0.93882	0.762027	1.01726	0.959048	0.765616	0.369059
ENSG00000143436	MRPL9	14.3592	26.2533	26.5875	26.7185	0.870006	6.95679e-188	0.888622	2.64851e-109	0.895235	3.0847e-132	0.00661022	1	1.13616	0.540984	1.55764	0.182819	0.697301	0.224159
ENSG00000143486	EIF2D	46.7892	35.1036	33.6411	36.0705	-0.414834	9.38846e-47	-0.475685	5.82729e-30	-0.375648	1.59852e-23	0.100039	0.193607	0.894119	0.592049	1.79412	0.0771288	0.670639	0.180043
ENSG00000143493	INTS7	10.8815	14.5579	13.7454	14.839	0.419899	1.10769e-28	0.337285	1.9901e-10	0.447607	3.95638e-21	0.110325	0.336402	1.09995	0.648351	1.76063	0.0899469	0.689177	0.209298
ENSG00000143569	UBAP2L	81.5609	98.1547	99.8713	98.8376	0.267325	8.6225e-28	0.292291	9.99395e-18	0.277358	3.35515e-19	-0.0149329	1	1.21834	0.345653	1.25153	0.500647	0.990164	0.973714
ENSG00000143621	ILF2	79.2892	106.533	107.926	106.32	0.426032	1.05219e-35	0.444846	8.31028e-21	0.423145	1.42817e-22	-0.0217013	1	0.908593	0.645591	0.968729	0.924182	0.706724	0.242071
ENSG00000143624	INTS3	85.6195	46.2616	42.0007	48.0304	-0.888006	7.58283e-95	-1.02746	3.3133e-59	-0.833884	7.04979e-50	0.193576	0.0476686	0.581157	0.0101139	0.569919	0.0919533	0.783469	0.421435
ENSG00000143742	SRP9	62.881	79.9586	76.9	82.458	0.346579	1.10581e-28	0.290342	4.00261e-11	0.391003	2.9669e-23	0.100661	0.259514	1.18936	0.407798	1.03946	0.907709	1.0529	0.864366
ENSG00000143799	PARP1	118.952	92.5744	89.135	93.3479	-0.36166	1.22993e-23	-0.416245	1.94274e-15	-0.349621	1.15975e-13	0.0666251	0.687714	1.06494	0.76304	1.37489	0.338221	0.572123	0.0583387
ENSG00000143889	HNRNPLL	18.7782	23.5204	24.223	23.1028	0.325252	2.41297e-30	0.367455	1.33401e-20	0.299514	1.16184e-16	-0.0679436	0.49775	1.16809	0.455747	0.918611	0.800131	0.843769	0.568455
ENSG00000143947	RPS27A	718.751	378.067	375.355	370.37	-0.926899	1.18294e-89	-0.93723	6.19154e-43	-0.956586	5.78817e-55	-0.019356	1	1.16656	0.459567	0.967205	0.920313	0.99024	0.973764
ENSG00000143977	SNRPG	12.4473	24.801	25.2035	25.3154	0.993909	3.78586e-132	1.0174	6.52087e-78	1.02344	1.44138e-93	0.0060369	1	1.39523	0.109908	1.24268	0.514341	1.09443	0.762584
ENSG00000144028	SNRNP200	171.801	162.686	166.185	157.782	-0.0785731	0.00376293	-0.0479012	0.271427	-0.122684	0.00042571	-0.0747828	0.34546	0.926136	0.712868	0.839211	0.599068	0.942688	0.843398
ENSG00000144029	MRPS5	28.7043	33.8202	34.1862	33.7687	0.235966	9.37364e-15	0.251855	4.79183e-09	0.233775	2.10075e-09	-0.0180814	1	0.928801	0.723113	0.846492	0.616694	0.770845	0.3824
ENSG00000144045	DQX1	0.115236	4.10378	2.01139	6.29241	5.12212	1.77627e-180	4.09019	1.22038e-101	5.73621	3.47814e-205	1.64558	8.99378e-08	1.02061	0.922096	0.711066	0.310795	1.87493	0.0331803
ENSG00000144048	DUSP11	10.2988	15.2778	15.9716	15.3782	0.568727	3.56107e-95	0.632273	6.60379e-66	0.578024	8.52567e-66	-0.0542545	0.63509	1.23992	0.301456	0.814287	0.537593	1.2118	0.519647
ENSG00000144161	ZC3H8	14.9047	6.95288	6.83446	6.92174	-1.10023	1.77166e-186	-1.12451	7.33714e-90	-1.10675	4.93459e-108	0.0177607	1	0.803091	0.293818	0.656558	0.206341	0.812577	0.486539
ENSG00000144218	AFF3	0.965995	4.25029	3.14388	3.58113	2.13393	6.71689e-64	1.69898	5.43484e-27	1.88687	1.12717e-38	0.187856	0.808922	0.589035	0.0111451	0.591771	0.120611	0.6511	0.147881
ENSG00000144231	POLR2D	8.94234	22.0653	22.1127	21.2925	1.30243	0	1.3057	6.08906264560586e-319	1.2511	0	-0.0546059	0.603911	1.06155	0.774708	0.850219	0.626032	0.746986	0.326271
ENSG00000144535	DIS3L2	21.5605	19.9178	20.1318	20.0463	-0.11463	8.75638e-05	-0.0988977	0.0229749	-0.104971	0.00651196	-0.00607304	1	0.969876	0.88337	0.75082	0.391239	0.962896	0.899302
ENSG00000144580	RQCD1	28.6254	35.7499	37.0476	35.5567	0.320573	1.23429e-37	0.371782	4.05408e-27	0.312909	3.00465e-23	-0.0588755	0.507155	1.05739	0.789142	NA	NA	NA	NA
ENSG00000144642	RBMS3	8.3283	13.3083	13.9794	13.026	0.676195	2.28511e-25	0.747073	4.56962e-17	0.645039	3.06494e-15	-0.102043	0.796527	1.0466	0.827232	0.716437	0.321697	0.900951	0.726919
ENSG00000144713	RPL32	796.866	559.387	545.067	537.944	-0.51052	1.25435e-23	-0.547898	1.43553e-13	-0.566909	1.65228e-17	-0.0190111	1	1.14267	0.522204	1.03861	0.90951	1.09244	0.766787
ENSG00000144736	SHQ1	10.6437	10.0365	9.94076	9.71236	-0.0847919	0.0111819	-0.0990273	0.0422588	-0.131659	0.00185169	-0.0326326	0.946109	1.11897	0.591043	0.777142	0.448912	0.892138	0.70346
ENSG00000144895	EIF2A	100.466	62.3858	65.41	61.1684	-0.687448	6.46622e-77	-0.6191	1.62283e-30	-0.715889	6.11734e-49	-0.0967896	0.413534	2.26769	0.000107646	2.69958	0.00287202	1.43971	0.228467
ENSG00000145191	EIF2B5	49.0123	38.5413	39.046	37.9704	-0.347037	6.39936e-45	-0.328085	2.94523e-20	-0.368575	1.50629e-30	-0.0404906	0.763606	0.955394	0.82676	0.925111	0.815587	1.12474	0.693858
ENSG00000145216	FIP1L1	15.9509	25.0938	25.1402	24.9685	0.654074	9.08741e-128	0.656684	2.40327e-69	0.646899	1.72397e-80	-0.00978741	1	1.04738	0.824321	0.848923	0.623319	0.895664	0.711619
ENSG00000145331	TRMT10A	6.39932	3.51956	3.16387	3.39744	-0.862257	5.13191e-80	-1.01552	2.747e-55	-0.913048	4.01063e-56	0.1025	0.51183	0.854756	0.451622	1.22987	0.534686	0.866793	0.633418
ENSG00000145388	METTL14	15.278	15.6687	14.5987	14.6499	0.0367449	0.351552	-0.065365	0.205618	-0.0602142	0.191638	0.0051513	1	0.832	0.377183	1.07595	0.826141	0.92454	0.792425
ENSG00000145391	SETD7	53.2567	63.5586	63.865	61.7006	0.255164	1.78789e-09	0.262055	1.3069e-05	0.212322	0.000113859	-0.0497339	0.907907	1.16031	0.475495	0.886141	0.718389	0.916533	0.770459
ENSG00000145414	NAF1	5.79046	6.11603	6.31999	5.91414	0.0803367	0.0321455	0.127224	0.0150599	0.0320606	0.601417	-0.0951739	0.382375	1.02175	0.917826	0.707163	0.308408	1.1005	0.748515
ENSG00000145425	RPS3A	601.495	276.15	261.251	263.191	-1.12315	2.53445e-131	-1.20308	2.1538e-71	-1.19253	3.91651e-87	0.0105518	1	0.781894	0.238619	1.11269	0.74897	0.745228	0.322351
ENSG00000145592	RPL37	472.504	503.016	468.606	464.992	0.0902379	0.130058	-0.0119462	1	-0.023151	0.865319	-0.0112048	1	0.993381	0.974617	0.925779	0.817269	0.993787	0.983425
ENSG00000145833	DDX46	52.0036	43.1494	42.0115	43.572	-0.268817	5.16112e-22	-0.307529	2.56695e-14	-0.254688	2.50281e-12	0.052842	0.675896	0.965211	0.865275	1.10827	0.757673	0.708882	0.246273
ENSG00000145907	G3BP1	90.8242	107.799	112.415	105.759	0.247286	1.06101e-13	0.307731	3.45195e-11	0.219737	2.74235e-07	-0.0879944	0.411522	1.40902	0.100436	1.07194	0.83487	1.20578	0.532191
ENSG00000145912	NHP2	25.9149	27.0324	26.5967	26.414	0.0603885	0.12874	0.0372595	0.583874	0.0269511	0.671614	-0.0103087	1	0.966125	0.868722	1.38506	0.327069	0.911237	0.755187
ENSG00000145982	FARS2	6.93151	9.67336	9.43685	9.6167	0.479732	3.20999e-44	0.44531	9.70212e-21	0.470984	1.05527e-27	0.0256721	1	0.750341	0.170555	0.534876	0.0628528	0.991698	0.977832
ENSG00000146007	ZMAT2	33.3757	58.9712	62.4532	56.8056	0.821074	4.84609e-193	0.903877	4.47418e-131	0.767068	1.97997e-111	-0.136811	0.0301877	1.09028	0.678679	1.06212	0.856506	0.992293	0.979342
ENSG00000146109	ABT1	15.293	19.7618	19.1641	20.108	0.36909	1.41476e-30	0.325348	5.13965e-13	0.393933	2.35842e-22	0.068585	0.590338	0.901793	0.620249	0.684696	0.272135	0.916712	0.770958
ENSG00000146223	RPL7L1	65.2807	61.7947	60.0837	59.8907	-0.0791217	0.00640159	-0.119634	0.00339955	-0.124316	0.000652582	-0.00468222	1	0.842895	0.412278	0.890033	0.726978	0.843602	0.568004
ENSG00000146282	RARS2	26.811	21.9656	21.5586	21.5489	-0.287642	5.2197e-22	-0.314281	2.04675e-13	-0.315581	2.73528e-16	-0.0012996	1	0.866648	0.493019	0.700348	0.285729	0.835577	0.546397
ENSG00000146453	PNLDC1	0.991782	0.517863	0.399242	0.474921	-0.937189	1.63708e-12	-1.3101	3.83357e-11	-1.06678	1.25854e-09	0.243782	0.669913	0.921869	0.696413	0.939447	0.85133	0.64407	0.137742
ENSG00000146676	PURB	41.929	47.9597	48.4482	46.3165	0.194024	2.74735e-13	0.208658	2.25685e-08	0.143813	2.90242e-05	-0.0648462	0.473512	1.07765	0.7214	1.62461	0.147181	0.549663	0.0416656
ENSG00000146834	MEPCE	31.594	40.336	40.973	38.3868	0.352033	3.79224e-25	0.374863	1.50816e-15	0.280613	7.90232e-11	-0.094252	0.372658	0.590008	0.0111501	0.475386	0.0260431	0.606878	0.0912527
ENSG00000146858	ZC3HAV1L	2.22963	2.59368	2.57219	2.51355	0.219476	0.000470748	0.206604	0.0235822	0.174959	0.0364072	-0.0316567	1	1.31326	0.190808	1.35519	0.362994	1.95406	0.0237387
ENSG00000146909	NOM1	23.1	16.4172	16.8	16.0496	-0.492101	1.1309e-59	-0.458855	8.94135e-26	-0.524429	2.32726e-40	-0.0655744	0.568358	1.18605	0.41305	1.62653	0.146176	0.756537	0.348884
ENSG00000147140	NONO	223.71	214.721	226.397	201.898	-0.059189	0.0604567	0.0172196	0.807128	-0.148024	0.000134043	-0.165244	0.00781069	1.00381	0.985446	1.07599	0.826038	1.14542	0.649307
ENSG00000147206	NXF3	0.566778	5.80338	2.90326	9.08897	3.35158	1.36044e-87	2.35243	1.26362e-32	3.99821	2.72173e-105	1.64585	1.36488e-07	1.11928	0.589515	0.689098	0.26792	1.23832	0.472664
ENSG00000147274	RBMX	157.677	90.557	90.8907	89.1645	-0.800159	3.06149e-138	-0.794798	4.06763e-64	-0.822515	3.1881e-84	-0.0277165	1	0.720258	0.115299	0.602325	0.133931	0.751383	0.336166
ENSG00000147403	RPL10	2286.49	985.878	980.268	983.302	-1.21367	8.28975e-152	-1.22188	5.68209e-70	-1.21745	3.12223e-86	0.00443687	1	1.11168	0.611478	0.977828	0.946371	1.12045	0.702776
ENSG00000147586	MRPS28	7.37705	6.76571	6.77759	6.55185	-0.125955	0.000377654	-0.12246	0.018247	-0.172988	0.000145028	-0.0505317	0.822547	1.10265	0.639524	1.19131	0.599003	0.876932	0.65944
ENSG00000147604	RPL7	908.672	406.663	412.389	381.908	-1.15997	1.42672e-144	-1.13974	2.34131e-65	-1.25059	8.24223e-96	-0.110851	0.451142	1.01619	0.938603	1.11989	0.734347	0.78007	0.403718
ENSG00000147669	POLR2K	15.3904	25.7511	26.7637	24.7424	0.742732	8.88714e-101	0.79858	2.47117e-64	0.685033	3.28429e-56	-0.113553	0.251732	0.986619	0.948488	1.18871	0.604141	0.7676	0.373744
ENSG00000147677	EIF3H	147.922	158.857	173.44	152.063	0.10286	0.00719327	0.229618	9.03116e-06	0.0397815	0.494119	-0.189837	0.0172853	1.41872	0.0956551	2.29069	0.0139843	0.860422	0.614556
ENSG00000147679	UTP23	11.2451	11.8232	12.6422	11.0189	0.0732583	0.0564323	0.169752	0.000958744	-0.0282045	0.642492	-0.197967	0.00860557	1.26432	0.265172	1.60446	0.15807	0.865753	0.630563
ENSG00000147905	ZCCHC7	17.1725	14.3297	13.9905	14.0781	-0.261398	4.04702e-11	-0.295746	2.42254e-07	-0.286802	2.54746e-08	0.008946	1	0.957866	0.836466	0.760568	0.410871	0.946069	0.8525
ENSG00000148090	AUH	16.5288	10.1576	9.18726	9.88139	-0.701822	2.7799e-76	-0.846676	8.10747e-57	-0.7416	9.6767e-55	0.105087	0.333395	0.872327	0.512197	0.928866	0.82503	1.19583	0.548973
ENSG00000148187	MRRF	23.4756	21.4557	21.0321	22.1752	-0.130004	0.000263685	-0.158644	0.00213882	-0.0822541	0.0926593	0.0763927	0.561469	1.07311	0.735562	0.994837	0.98763	0.875985	0.656811
ENSG00000148296	SURF6	27.0134	32.7138	30.5569	32.9815	0.275943	1.78414e-17	0.177827	0.000119426	0.287877	1.45587e-12	0.110052	0.205521	0.673719	0.0587418	0.887959	0.72173	0.88509	0.683906
ENSG00000148300	REXO4	27.1764	22.8728	22.5645	21.7748	-0.24927	1.94315e-12	-0.268554	9.89076e-08	-0.320081	1.42822e-12	-0.0515279	0.812244	0.629364	0.0263215	0.900296	0.75295	0.944059	0.848714
ENSG00000148303	RPL7A	1590.28	746.794	703.914	713.577	-1.09052	1.23243e-123	-1.1758	3.18909e-68	-1.15616	5.05329e-82	0.0196387	1	0.87351	0.516697	0.895165	0.73958	1.39216	0.266008
ENSG00000148584	A1CF	29.1695	8.11924	3.36136	7.66262	-1.84453	7.66483e-53	-3.11545	5.83721e-70	-1.92798	2.24766e-40	1.18764	5.74039e-10	0.690491	0.074666	1.17247	0.632757	0.741624	0.315339
ENSG00000148688	RPP30	12.3246	13.519	13.8597	13.2294	0.132466	1.11878e-05	0.169611	7.1775e-05	0.101115	0.0109923	-0.0685	0.531914	1.4411	0.0786698	1.27561	0.464814	1.12357	0.69587
ENSG00000148840	PPRC1	48.2162	42.2371	43.0842	43.4046	-0.19097	2.42646e-05	-0.162243	0.0158611	-0.151581	0.011936	0.0106627	1	0.99582	0.983977	0.466232	0.027033	0.996866	0.991601
ENSG00000148843	PDCD11	46.1611	36.0995	36.1713	35.5271	-0.354785	9.56506e-29	-0.351533	2.88448e-14	-0.377735	1.13963e-19	-0.0262018	1	1.13507	0.543271	0.69357	0.272639	1.31092	0.36345
ENSG00000149016	TUT1	37.8884	10.9112	10.7552	10.8174	-1.79688	0	-1.81659	2.1092e-224	-1.8093	1.31735e-278	0.00729107	1	0.823156	0.350011	0.663372	0.217859	1.05327	0.862101
ENSG00000149100	EIF3M	98.0731	91.3311	94.7683	92.4918	-0.102886	0.0105383	-0.0494965	0.478051	-0.0847066	0.121514	-0.0352103	0.988176	1.66356	0.0147451	1.86699	0.0605285	1.00898	0.976145
ENSG00000149187	CELF1	97.9833	85.4956	89.7599	85.5003	-0.196615	2.00376e-16	-0.126476	0.000224996	-0.196483	9.20863e-11	-0.0700069	0.303928	0.861647	0.475669	0.706425	0.297699	0.761297	0.359894
ENSG00000149262	INTS4	19.8323	15.7698	16.9776	15.5007	-0.330552	7.78153e-38	-0.224246	4.30303e-10	-0.355048	3.64962e-28	-0.130806	0.0156522	1.34446	0.155115	1.74418	0.0955513	0.822442	0.51148
ENSG00000149273	RPS3	1041.12	823.943	810.479	820.404	-0.337537	1.03292e-12	-0.361283	1.76558e-07	-0.343746	3.1762e-08	0.0175369	1	1.64833	0.0166847	1.51456	0.216166	1.0587	0.848597
ENSG00000149289	ZC3H12C	13.5413	9.61339	11.0495	8.01489	-0.49376	1.03677e-18	-0.293345	0.000250596	-0.755917	4.83112e-26	-0.4626	6.63586e-06	0.796629	0.274954	1.02676	0.936959	0.608683	0.0932337
ENSG00000149532	CPSF7	101.857	56.772	57.1831	55.3613	-0.84311	1.02285e-252	-0.832873	5.93798e-117	-0.879347	6.51896e-160	-0.0464739	0.669018	1.09965	0.649286	1.29642	0.435503	1.11186	0.723629
ENSG00000149577	SIDT2	232.167	48.1497	43.7134	47.4354	-2.26958	0	-2.40893	9.57525e-176	-2.29106	2.1874e-203	0.117877	0.533641	0.681694	0.0660705	0.697075	0.279372	0.800784	0.458044
ENSG00000149657	LSM14B	33.1335	29.2323	28.5795	27.4011	-0.180532	2.57636e-08	-0.21312	2.12551e-06	-0.273512	9.80431e-12	-0.0603936	0.645541	0.626255	0.0240459	1.32721	0.39711	0.632505	0.123494
ENSG00000149658	YTHDF1	40.9635	52.9359	52.9162	51.2599	0.36986	1.32221e-47	0.369366	1.03353e-25	0.323563	7.76652e-24	-0.0458045	0.707848	0.673897	0.0569989	0.852796	0.633028	0.839458	0.559172
ENSG00000149743	TRPT1	22.4332	18.1724	17.7222	18.5593	-0.304564	1.94446e-13	-0.340261	1.68599e-08	-0.274059	4.82547e-07	0.0662045	0.776011	1.01794	0.932118	1.18318	0.615605	0.921455	0.783794
ENSG00000149792	MRPL49	29.7636	41.347	43.1611	40.1459	0.474365	3.28894e-65	0.536236	9.11368e-45	0.431895	7.00552e-35	-0.104343	0.146987	1.42525	0.091334	1.34078	0.380245	1.47104	0.201848
ENSG00000149806	FAU	286.938	264.263	260.753	267.521	-0.11882	0.00708207	-0.138052	0.0348771	-0.101149	0.092645	0.0369033	1	1.42033	0.0926787	1.29011	0.446359	1.32586	0.345519
ENSG00000150316	CWC15	27.8553	32.432	33.3946	32.5652	0.219076	8.88461e-14	0.261562	1.8588e-10	0.224774	1.79759e-09	-0.036789	0.888541	1.42875	0.087257	0.973779	0.936562	1.16242	0.615563
ENSG00000150459	SAP18	55.5377	86.9514	80.7422	90.3099	0.64668	6.38039e-90	0.539919	1.63825e-34	0.701359	7.40312e-70	0.16144	0.0269536	0.887567	0.567088	1.12237	0.728959	0.927475	0.800636
ENSG00000150593	PDCD4	733.092	73.7374	65.456	72.9818	-3.31353	0	-3.48534	3.02754e-232	-3.32842	3.48667e-274	0.156924	0.424793	0.768657	0.207422	0.945084	0.865635	0.729031	0.290123
ENSG00000150773	PIH1D2	0.952109	1.1814	1.1459	1.12069	0.309948	4.66983e-08	0.26807	0.000900233	0.229905	0.00161894	-0.0382034	1	0.756752	0.180325	0.742735	0.371238	0.917521	0.772781
ENSG00000150990	DHX37	28.7315	20.5382	20.6199	20.1791	-0.484715	8.94067e-32	-0.478918	2.10433e-15	-0.510084	5.62745e-21	-0.0311664	1	0.853447	0.446884	0.871938	0.682624	0.659796	0.161015
ENSG00000151014	NOCT	1.84318	3.69996	3.81281	3.44952	1.00579	4.0076e-63	1.04841	6.50362e-39	0.904644	3.79622e-34	-0.14382	0.496421	0.866155	0.490476	0.759087	0.409711	0.650805	0.149062
ENSG00000151065	DCP1B	9.60644	12.259	11.0156	10.6726	0.351208	3.29249e-12	0.19733	0.00319119	0.151002	0.0140048	-0.0463313	0.96165	0.838399	0.398329	0.923031	0.811219	0.866951	0.631823
ENSG00000151247	EIF4E	12.6915	19.8047	19.9537	18.6684	0.642504	1.34281e-89	0.653099	3.18394e-52	0.557292	2.20234e-45	-0.0958127	0.30294	1.07519	0.728589	1.41842	0.29264	1.0727	0.814997
ENSG00000151304	SRFBP1	4.89852	7.07545	7.3927	7.00329	0.531482	1.98389e-36	0.59417	9.91152e-25	0.516717	2.05625e-22	-0.0774659	0.691347	1.37645	0.124644	0.964692	0.914251	1.04579	0.881351
ENSG00000151461	UPF2	33.9982	28.6955	27.8646	29.2329	-0.244049	1.60611e-14	-0.286447	4.61172e-10	-0.217181	1.70516e-07	0.0692671	0.569698	1.38447	0.117885	1.1044	0.76568	1.18531	0.568171
ENSG00000151576	QTRTD1	13.0511	15.5113	16.2797	15.4508	0.249434	7.75559e-16	0.31875	7.16794e-14	0.243987	4.32695e-10	-0.0747664	0.473578	1.61238	0.0227496	NA	NA	NA	NA
ENSG00000151657	KIN	12.498	8.99735	8.84589	9.32016	-0.473314	1.33933e-68	-0.497028	1.11893e-37	-0.423184	6.54629e-34	0.0738515	0.372297	0.853293	0.447228	0.639294	0.182052	0.554155	0.045031
ENSG00000151806	GUF1	18.6013	18.8049	16.7921	18.2855	0.0155727	0.767463	-0.147049	0.00408216	-0.0246529	0.692141	0.122401	0.171593	0.558118	0.00491689	0.615703	0.144242	0.683086	0.201196
ENSG00000151846	PABPC3	0.380781	0.324637	0.372916	0.306963	-0.217085	0.0240902	-0.018905	0.997981	-0.29239	0.0196228	-0.273945	0.307181	1.70568	0.0110454	2.15212	0.0201739	1.13864	0.664956
ENSG00000151923	TIAL1	51.3783	51.6878	50.9949	51.9798	0.00855648	0.824391	-0.0107355	0.891036	0.0166839	0.710035	0.0274197	0.9264	1.01812	0.931372	0.884303	0.712479	0.9575	0.884204
ENSG00000151962	RBM46	0.146744	0.109694	0.0454097	0.103449	-0.406556	0.105835	-1.633	7.31302e-06	-0.491419	0.144062	1.1527	0.0274735	0.831567	0.376734	0.729118	0.341992	0.675126	0.185762
ENSG00000152147	GEMIN6	4.84632	8.42926	8.43282	8.48317	0.795237	6.25264e-93	0.797125	4.96009e-51	0.803995	6.38045e-62	0.00686246	1	1.014	0.946867	0.722582	0.328296	1.10493	0.738334
ENSG00000152332	UHMK1	43.7275	79.982	79.1665	84.801	0.871221	2.23179e-128	0.856404	9.63867e-71	0.955666	1.76562e-105	0.0992618	0.386521	1.36338	0.137053	1.3444	0.373624	1.10233	0.744297
ENSG00000152404	CWF19L2	8.78091	9.83192	10.3778	9.69171	0.164238	3.6801e-06	0.241654	8.18706e-07	0.143523	0.00176226	-0.0981386	0.348801	1.14234	0.524587	0.829202	0.573643	0.70461	0.237992
ENSG00000152430	BOLL	0.0185271	0.017549	0.0161275	0.0216952	-0.0566533	0.966657	-0.147322	0.855938	0.222108	0.509316	0.379924	0.761242	0.776907	0.227564	0.547292	0.0734675	0.791038	0.43079
ENSG00000152464	RPP38	4.95079	9.1359	8.6968	9.46665	0.8813	2.58814e-154	0.811385	1.47125e-72	0.932976	2.16356e-115	0.12159	0.162429	0.900334	0.614527	0.717679	0.320428	0.888419	0.691394
ENSG00000152518	ZFP36L2	171.893	255.438	244.954	282.947	0.571445	3.9967e-29	0.510972	1.84222e-13	0.719002	5.07007e-31	0.208031	0.0936297	1.15216	0.496694	0.576576	0.108041	1.53414	0.148153
ENSG00000152520	PAN3	51.1115	33.1437	32.852	34.4201	-0.624595	2.89458e-85	-0.637429	3.32315e-43	-0.570028	5.07026e-43	0.067403	0.589126	0.800754	0.287423	0.970539	0.928514	0.652749	0.15195
ENSG00000152601	MBNL1	53.6494	101.127	105.255	99.8045	0.914503	9.89947e-137	0.97214	3.08371e-86	0.895478	1.48924e-86	-0.0766636	0.617178	1.10891	0.619962	0.837066	0.598341	0.772619	0.385701
ENSG00000152670	DDX4	0.33951	0.049362	0.0402611	0.0616568	-2.72769	6.12535e-102	-2.97737	9.31735e-51	-2.41847	1.1679e-46	0.566931	0.0536247	0.935952	0.751378	0.679643	0.250362	0.722203	0.275879
ENSG00000152684	PELO	12.9215	23.7176	24.7959	23.1508	0.875933	3.9082e-160	0.940179	2.98453e-103	0.840902	1.17737e-97	-0.0992831	0.30346	0.955011	0.82526	0.706788	0.29842	1.25998	0.438265
ENSG00000152778	IFIT5	10.0723	18.7133	18.6445	19.0963	0.893628	1.94161e-98	0.888287	7.24816e-54	0.922695	3.32543e-69	0.0344055	1	1.00933	0.964612	0.624806	0.165022	1.11545	0.714503
ENSG00000152795	HNRNPDL	243.295	167.608	172.485	168.394	-0.537622	6.80171e-77	-0.49623	2.75572e-32	-0.530888	8.48527e-45	-0.0346581	0.902218	0.80383	0.296894	0.52482	0.058714	0.966434	0.909027
ENSG00000152969	JAKMIP1	0.829411	1.80378	1.12499	1.04851	1.11732	1.01425e-18	0.437679	0.00750612	0.336924	0.0263794	-0.100838	0.997793	0.592988	0.0129248	0.576225	0.107643	0.583782	0.0710906
ENSG00000153015	CWC27	9.51607	15.44	14.9729	15.8812	0.697876	3.38026e-92	0.653831	3.52185e-44	0.738262	1.59669e-67	0.0844313	0.48163	1.09781	0.654433	1.40179	0.311647	1.02592	0.931761
ENSG00000153037	SRP19	29.9539	12.958	12.39	12.9315	-1.20869	7.4477e-215	-1.2729	5.21736e-109	-1.21203	9.50593e-124	0.0608799	0.771493	0.918954	0.686904	0.682218	0.260435	1.08202	0.791866
ENSG00000153048	CARHSP1	26.3881	59.5985	60.5127	58.8802	1.17519	1.26675e-215	1.1972	4.52829e-127	1.15767	4.65531e-140	-0.0395354	0.952587	1.09929	0.650408	0.877656	0.695667	1.19904	0.546995
ENSG00000153187	HNRNPU	190.556	241.372	246.527	239.469	0.341007	9.12486e-36	0.371499	2.44618e-22	0.329588	3.07773e-21	-0.0419117	0.80791	1.10062	0.64586	0.885421	0.716577	0.907664	0.745185
ENSG00000153201	RANBP2	114.335	81.8951	77.3351	79.1978	-0.481283	4.88854e-44	-0.563933	1.03396e-30	-0.529512	2.02352e-33	0.0344216	0.955667	1.00504	0.980782	0.755451	0.405254	1.18142	0.577952
ENSG00000153250	RBMS1	21.2527	58.8082	72.5411	53.3491	1.46806	1.09068e-186	1.7707	3.05689e-182	1.32748	1.95936e-116	-0.443225	1.48259e-06	1.28593	0.226573	0.739303	0.369789	0.880977	0.670673
ENSG00000153914	SREK1	90.0331	46.902	44.7019	47.23	-0.940423	6.94515e-174	-1.00977	3.11611e-93	-0.93043	3.56086e-99	0.0793432	0.490944	0.768754	0.206887	0.721235	0.327758	1.03131	0.917653
ENSG00000153944	MSI2	34.8165	46.7274	41.7771	45.5707	0.424442	3.04857e-28	0.262949	4.94046e-07	0.388334	6.27996e-17	0.125386	0.215056	0.939534	0.764864	1.01555	0.963083	0.928013	0.802522
ENSG00000154548	SRSF12	1.39969	1.4187	1.15059	1.16364	0.018889	0.91384	-0.283924	0.0194309	-0.267511	0.0138424	0.0164361	1	0.556667	0.00485516	0.49765	0.040146	0.619128	0.106637
ENSG00000154719	MRPL39	12.9141	9.64431	9.25821	9.97278	-0.421557	2.25868e-32	-0.479927	1.10538e-20	-0.373792	6.83019e-16	0.106144	0.305962	1.49955	0.0524167	1.19094	0.600212	1.24699	0.460966
ENSG00000154743	TSEN2	13.617	6.2355	5.57396	6.64962	-1.12653	5.18781e-163	-1.28722	1.4914e-98	-1.03358	5.97394e-82	0.253673	0.00240025	0.979547	0.921071	0.918146	0.79774	1.20623	0.529741
ENSG00000155275	TRMT44	10.5449	8.02549	7.39565	8.64667	-0.393695	1.41917e-34	-0.511141	2.57394e-29	-0.286094	2.42246e-12	0.225068	0.000343798	0.880038	0.540555	0.497497	0.0371731	1.14093	0.660075
ENSG00000155363	MOV10	51.4458	41.262	42.9029	41.795	-0.318325	1.7459e-16	-0.262155	2.8985e-06	-0.299742	2.29219e-09	-0.0375864	0.966826	1.03776	0.858947	0.467178	0.0225981	1.3759	0.288334
ENSG00000155438	NIFK	20.4854	26.4125	26.9559	27.3337	0.36621	1.05451e-22	0.395801	1.34123e-14	0.415595	4.20197e-19	0.0197936	1	1.57774	0.0287413	0.95742	0.896132	1.14099	0.658683
ENSG00000155506	LARP1	300.175	163.643	166.135	155.174	-0.875184	2.845e-143	-0.853377	2.26481e-65	-0.951827	9.47535e-99	-0.09845	0.325755	1.111	0.615625	1.36484	0.35181	0.984333	0.95802
ENSG00000155508	CNOT8	27.8848	45.4662	47.5036	44.8879	0.705233	5.28692e-156	0.768416	5.44141e-102	0.686732	7.79411e-97	-0.0816869	0.295586	1.20459	0.373136	0.597863	0.121001	1.34139	0.332694
ENSG00000155636	RBM45	8.96918	6.35028	6.45721	6.38333	-0.498142	1.87204e-78	-0.474026	1.76292e-35	-0.491059	3.18421e-46	-0.0170304	1	0.932005	0.73577	0.839818	0.602278	0.748167	0.329874
ENSG00000155846	PPARGC1B	5.05161	4.43986	3.65587	4.93526	-0.184012	0.00368232	-0.46447	1.83051e-07	-0.0319146	0.797741	0.432622	0.000370103	0.992502	0.971215	0.954588	0.889273	0.808892	0.476137
ENSG00000155858	LSM11	7.25604	7.25714	7.60749	7.01911	0.000319182	1	0.068491	0.259983	-0.0483751	0.41145	-0.116876	0.269601	1.24711	0.289043	1.38768	0.326501	1.00626	0.983334
ENSG00000155966	AFF2	0.711008	1.10776	0.904683	1.04445	0.635014	8.23984e-08	0.342642	0.0482984	0.550263	0.000225377	0.207721	0.721834	0.856018	0.456429	0.649513	0.198297	0.801661	0.458484
ENSG00000156304	SCAF4	30.1415	26.5908	25.5722	27.4974	-0.180322	1.46758e-10	-0.23647	4.73308e-09	-0.132082	0.000363729	0.104391	0.142206	0.933562	0.741573	0.461535	0.0223582	0.893882	0.70664
ENSG00000156414	TDRD9	2.27396	1.83429	1.35112	1.52587	-0.308432	0.0141284	-0.74983	1.97539e-05	-0.573265	0.000262621	0.176666	0.807643	0.544656	0.00356958	0.52145	0.0525733	0.511707	0.0248793
ENSG00000156482	RPL30	358.551	429.644	454.744	405.752	0.260943	1.78245e-09	0.342892	1.28058e-08	0.178393	0.00168969	-0.1645	0.130599	1.30205	0.206962	1.40421	0.309157	0.985053	0.959964
ENSG00000156502	SUPV3L1	16.5258	15.6473	15.2777	15.1347	-0.0796405	0.0161765	-0.112815	0.0158843	-0.12737	0.00218084	-0.0145547	1	0.932925	0.73916	1.09705	0.781364	1.28071	0.406471
ENSG00000156508	EEF1A1	6815.93	3040.4	2989.77	2989.66	-1.16465	1.1038e-162	-1.18887	2.1539e-77	-1.18893	5.26825e-96	-5.94376e-05	1	0.972897	0.895257	0.840379	0.601979	1.10308	0.742067
ENSG00000156697	UTP14A	22.1792	17.3987	17.7514	17.3406	-0.350598	1.05154e-16	-0.321385	1.92625e-07	-0.355396	1.39924e-10	-0.0340108	1	1.43968	0.0806441	1.14567	0.683534	1.02835	0.926192
ENSG00000156976	EIF4A2	427.64	283.636	293.72	270.478	-0.592351	6.18879e-53	-0.541958	5.75625e-22	-0.660884	1.12606e-38	-0.118926	0.280266	1.22515	0.329419	1.38146	0.333234	1.68475	0.0768896
ENSG00000156990	RPUSD3	16.7639	14.4805	13.885	14.0322	-0.212093	2.27816e-09	-0.271933	5.69662e-08	-0.257157	1.20663e-08	0.0147784	1	0.824525	0.354155	1.10206	0.770896	0.869638	0.639242
ENSG00000157036	EXOG	6.87162	5.13691	4.83571	4.95671	-0.418103	1.97994e-28	-0.506331	2.45179e-21	-0.469753	1.10142e-22	0.0365881	0.971435	0.468731	0.000280699	0.490829	0.0362146	0.579523	0.0656017
ENSG00000157106	SMG1	103.671	79.5968	80.6926	81.4124	-0.381046	8.36439e-21	-0.361402	1.07567e-09	-0.348488	6.01905e-11	0.0129145	1	1.40243	0.104471	1.34695	0.370547	1.06123	0.842018
ENSG00000157110	RBPMS	75.0679	57.1054	57.5216	60.693	-0.394655	3.2154e-17	-0.384205	1.06715e-08	-0.30678	4.01679e-07	0.0774261	0.746383	1.05907	0.783148	0.742787	0.37135	0.665784	0.170442
ENSG00000158042	MRPL17	21.1107	36.7883	36.0226	37.2048	0.800987	1.03507e-95	0.771033	1.88879e-48	0.817141	5.56837e-65	0.0461069	0.909612	1.24371	0.29508	1.1213	0.731101	1.13644	0.667786
ENSG00000158163	DZIP1L	9.56253	6.38058	5.85082	7.10075	-0.583581	1.00797e-21	-0.708808	1.60602e-15	-0.429448	6.65065e-08	0.279392	0.0436033	0.925497	0.712698	0.62325	0.16903	1.0201	0.946794
ENSG00000158417	EIF5B	142.534	78.5782	79.6295	78.5869	-0.858999	1.83937e-94	-0.839771	1.83625e-42	-0.858851	1.72734e-54	-0.0190789	1	1.50023	0.0528896	1.21706	0.557472	0.929968	0.807603
ENSG00000158435	CNOT11	40.8815	41.8737	40.5362	44.4831	0.0343223	0.351443	-0.0124567	0.920463	0.121626	0.00395918	0.134084	0.0802782	0.949483	0.803645	0.832335	0.581988	0.991276	0.976606
ENSG00000158526	TSR2	24.4617	34.4322	32.8347	33.2	0.493223	1.83984e-53	0.424908	9.31846e-23	0.440591	3.0902e-29	0.015683	1	0.797425	0.277646	0.725932	0.335286	1.23517	0.477983
ENSG00000158545	ZC3H18	29.272	34.559	35.8121	34.3354	0.239674	3.56423e-19	0.290917	6.08398e-15	0.230508	1.43661e-11	-0.0604103	0.540013	0.90813	0.64415	0.627521	0.16426	0.839055	0.555738
ENSG00000158806	NPM2	6.38737	3.56704	2.25792	2.87575	-0.84158	3.95685e-19	-1.49999	2.18439e-32	-1.15246	2.85132e-25	0.347633	0.0758404	0.634698	0.028815	0.774997	0.443929	0.569658	0.0588732
ENSG00000158941	CCAR2	54.5408	58.9831	56.9733	58.3059	0.112799	0.000113715	0.0629147	0.162292	0.096207	0.0118432	0.0332926	0.909878	0.922128	0.697613	0.551587	0.0773932	1.35704	0.30695
ENSG00000159111	MRPL10	38.7735	30.8645	32.3005	29.9091	-0.329442	1.2922e-16	-0.263742	5.96583e-06	-0.374793	5.79527e-13	-0.111053	0.36143	1.28604	0.230398	1.92037	0.0520577	1.04503	0.883258
ENSG00000159140	SON	198.979	166.26	162.157	165.839	-0.25905	2.0609e-15	-0.295116	4.30486e-10	-0.262719	6.82906e-10	0.0323971	0.965766	0.823563	0.351241	0.732201	0.354571	0.701574	0.232194
ENSG00000159217	IGF2BP1	0.0442725	1.29388	2.03892	1.00604	4.83292	2.46073e-108	5.48202	7.87165e-114	4.46678	5.24411e-84	-1.01764	0.0143995	1.31138	0.192637	1.53318	0.197115	0.801096	0.457045
ENSG00000159409	CELF3	10.064	12.9242	4.7694	5.00061	0.360752	0.0431594	-1.07675	2.5143e-06	-1.00853	7.02307e-07	0.0682372	1	0.592299	0.0117726	0.928158	0.822982	0.624515	0.11324
ENSG00000160075	SSU72	73.2841	87.6032	83.9053	88.4344	0.257401	2.07053e-13	0.195254	0.000105051	0.271026	1.22687e-09	0.0757726	0.579707	0.912605	0.660925	0.678947	0.243169	1.03625	0.905132
ENSG00000160193	WDR4	8.44056	7.3032	7.56053	7.35011	-0.209368	5.41018e-06	-0.158699	0.0212324	-0.200406	0.000945339	-0.0417088	0.989721	1.09875	0.651484	1.53886	0.193209	0.574085	0.064698
ENSG00000160201	U2AF1	46.8675	0.826603	0.841607	0.887926	-5.81974	0	-5.79604	3.05774e-244	-5.71528	1.67425e-306	0.0809189	0.996222	0.763604	0.198337	0.55785	0.083354	0.911914	0.758484
ENSG00000160208	RRP1B	28.6733	26.9145	28.8185	25.4646	-0.0912448	0.00920375	0.00736512	1	-0.171172	0.00010418	-0.178541	0.0128902	1.12001	0.586906	1.25731	0.491859	0.519152	0.0261125
ENSG00000160214	RRP1	21.2704	24.6312	25.2885	24.7591	0.211171	4.72753e-06	0.249558	0.0001325	0.21848	0.000233591	-0.0310794	1	0.979978	0.922727	1.05225	0.878544	0.94035	0.83658
ENSG00000160633	SAFB	69.3933	71.5059	65.7689	72.1571	0.0431085	0.138386	-0.0774472	0.0537837	0.0562403	0.12436	0.133689	0.0198251	0.578153	0.00907319	0.825581	0.567106	0.784678	0.420601
ENSG00000160679	CHTOP	85.2334	61.2565	58.3812	64.7366	-0.47656	7.02728e-78	-0.545681	1.17505e-50	-0.39677	5.00171e-34	0.148912	0.00487669	1.01633	0.938085	0.903528	0.761125	0.638602	0.130155
ENSG00000160710	ADAR	154.343	245.913	244.91	252.737	0.672022	9.90349e-124	0.666119	5.40341e-66	0.71151	2.87635e-90	0.0453913	0.792159	1.43338	0.085219	1.45526	0.258301	0.750835	0.335885
ENSG00000160818	GPATCH4	22.9825	25.1706	24.0664	26.2572	0.130922	0.0065181	0.0665365	0.404348	0.191858	0.00164329	0.125324	0.395535	1.13511	0.543081	1.3399	0.378367	0.741666	0.314472
ENSG00000160862	AZGP1	409.247	62.9666	37.1623	76.0359	-2.7004	2.74615e-101	-3.46102	1.0365e-66	-2.42833	3.22923e-48	1.03271	2.46288e-06	1.12577	0.570086	1.32688	0.395319	1.37382	0.284863
ENSG00000160917	CPSF4	28.4071	17.4153	17.6431	16.5352	-0.706445	4.55945e-70	-0.686891	2.32342e-32	-0.78133	2.71451e-50	-0.0944398	0.496229	0.579085	0.00853771	0.765899	0.425149	0.624312	0.111556
ENSG00000161016	RPL8	1317.17	1169.46	1191.22	1103.85	-0.171616	0.00186007	-0.145001	0.0835981	-0.254921	0.000348082	-0.109921	0.605858	1.31792	0.185805	1.45788	0.261973	1.16163	0.615758
ENSG00000161082	CELF5	2.23059	1.21047	0.45542	0.532485	-0.880816	3.05222e-11	-2.28814	2.80448e-48	-2.0623	7.59367e-51	0.22628	0.529908	0.68673	0.0699033	0.626756	0.159837	0.900181	0.724768
ENSG00000161265	U2AF1L4	15.0678	6.58128	6.01326	6.568	-1.19536	5.95031e-105	-1.32522	3.42872e-59	-1.19823	2.83035e-61	0.127012	0.501783	0.481233	0.000497032	0.701009	0.296241	0.552891	0.04634
ENSG00000161547	SRSF2	108.403	83.1484	85.4028	84.583	-0.382584	2.43584e-30	-0.343988	9.06533e-13	-0.357934	1.4113e-16	-0.0139457	1	1.12293	0.57834	0.834151	0.591166	0.889439	0.69424
ENSG00000161642	ZNF385A	5.30661	21.6924	26.3516	19.9371	2.03001	1.19823e-199	2.31052	1.53646e-172	1.90824	6.05391e-133	-0.402311	0.00359284	0.829799	0.372033	0.797047	0.501299	0.593347	0.0784518
ENSG00000161654	LSM12	6.66873	5.52207	5.81339	5.53521	-0.272385	1.86924e-15	-0.198736	5.76496e-05	-0.268701	9.45022e-10	-0.0699696	0.598363	1.44181	0.0811486	1.55893	0.18199	1.39756	0.265177
ENSG00000161813	LARP4	45.4379	31.377	30.1785	31.0828	-0.533828	2.77438e-45	-0.590038	6.44656e-27	-0.547397	1.18796e-28	0.0426427	0.920423	1.14771	0.509375	1.38598	0.326077	0.954495	0.876129
ENSG00000161847	RAVER1	39.6544	16.5808	15.2609	16.2968	-1.25779	9.07939e-138	-1.37769	3.78268e-76	-1.28246	2.74044e-83	0.095239	0.652364	0.823256	0.351227	0.78396	0.466942	0.822436	0.51398
ENSG00000161960	EIF4A1	366.191	5.80418	5.70747	6.02193	-5.97843	0	-6.00279	0	-5.92555	0	0.0772651	0.911316	0.98096	0.926822	0.766525	0.430214	0.810923	0.483997
ENSG00000161970	RPL26	576.941	204.512	177.66	194.25	-1.49634	2.34319e-169	-1.69928	2.36063e-104	-1.57061	1.82385e-113	0.128669	0.432179	0.859662	0.469588	0.825912	0.567921	0.854459	0.599702
ENSG00000161981	SNRNP25	11.5585	12.9044	11.8615	12.547	0.15892	0.00046955	0.0381384	0.65782	0.118381	0.0457726	0.0802465	0.685416	0.670549	0.0551057	0.902483	0.75848	0.655026	0.155372
ENSG00000162231	NXF1	130.633	58.3322	57.6743	58.3269	-1.16313	1.37134e-285	-1.17953	3.42878e-133	-1.16329	3.33369e-161	0.0162354	1	0.740733	0.153325	0.514298	0.0475904	0.722801	0.280015
ENSG00000162244	RPL29	716.06	357.432	339.632	356.299	-1.00246	6.80796e-89	-1.0761	1.85586e-47	-1.00703	5.34252e-52	0.0690655	0.837707	1.13426	0.546993	1.02471	0.941707	1.24628	0.460343
ENSG00000162374	ELAVL4	1.80516	2.9643	1.98085	1.97931	0.714861	1.22588e-07	0.134153	0.547705	0.133318	0.502094	-0.000840478	1	0.56756	0.00651239	1.06548	0.849064	0.458689	0.00862335
ENSG00000162385	MAGOH	11.5112	18.123	18.5699	18.0304	0.65454	7.15165e-88	0.689909	3.41365e-53	0.64698	7.78466e-56	-0.0429336	0.878404	1.2457	0.292116	1.00202	0.995171	1.28999	0.397574
ENSG00000162396	PARS2	2.99477	3.89374	3.85979	3.70908	0.377787	2.61448e-20	0.365227	1.19917e-10	0.308321	2.79025e-09	-0.0569217	0.834397	0.980228	0.923863	1.18401	0.614136	1.03938	0.897561
ENSG00000162408	NOL9	23.8853	14.6692	15.0042	13.4456	-0.70341	3.19525e-101	-0.670758	1.23746e-47	-0.829235	6.88213e-87	-0.158481	0.0243104	0.571892	0.00710791	0.720635	0.326517	0.529753	0.0306016
ENSG00000162437	RAVER2	16.7583	16.4634	12.1353	18.4466	-0.0250177	0.690624	-0.465075	2.19782e-13	0.139141	0.0169906	0.604242	2.3203e-14	0.822646	0.348817	0.653356	0.201041	0.930926	0.81065
ENSG00000162613	FUBP1	83.0523	59.4098	62.6888	58.4768	-0.483089	2.64594e-48	-0.405693	1.81052e-17	-0.505901	6.35947e-32	-0.100209	0.291734	1.5566	0.0330544	1.62745	0.140687	1.15813	0.622211
ENSG00000162623	TYW3	16.702	13.1479	13.3636	12.1645	-0.344201	1.59095e-23	-0.321064	3.68419e-11	-0.456457	1.54755e-25	-0.135398	0.0964726	0.745194	0.156894	1.00692	0.983484	1.06692	0.82901
ENSG00000162639	HENMT1	1.32983	8.67274	8.5635	8.9328	2.70001	3.91251475445603e-314	2.68146	1.0894e-205	2.74284	1.1838e-244	0.0613216	1	0.843955	0.415731	0.630999	0.169412	0.811177	0.482046
ENSG00000162664	ZNF326	51.1858	18.8308	17.6196	19.0707	-1.44214	0	-1.5384	3.39667e-231	-1.42367	3.70771e-251	0.114731	0.144926	0.839741	0.403415	0.631828	0.175482	1.10792	0.730981
ENSG00000162775	RBM15	5.41194	8.53266	8.42005	8.92826	0.657687	5.26767e-73	0.63834	4.86493e-38	0.723231	1.86009e-58	0.0848906	0.520617	1.19626	0.392292	0.909331	0.775793	1.16766	0.607208
ENSG00000162782	TDRD5	0.415133	1.4348	1.01884	1.59291	1.78081	2.80907e-43	1.28694	3.90247e-14	1.93071	5.25332e-37	0.643947	0.0288156	0.939318	0.763968	1.03353	0.921181	0.785252	0.419206
ENSG00000162851	TFB2M	13.0222	10.5106	9.7469	10.8284	-0.309319	3.11121e-14	-0.4176	1.13982e-12	-0.266047	5.37904e-07	0.151565	0.140085	1.0317	0.881257	1.34838	0.368836	0.658314	0.157907
ENSG00000162910	MRPL55	21.302	22.7745	20.5173	23.1182	0.0959892	0.0923345	-0.0540491	0.594975	0.117873	0.109913	0.171927	0.244238	0.884946	0.557877	0.874791	0.689802	0.875248	0.654767
ENSG00000162927	PUS10	3.9389	5.14915	5.31213	5.31411	0.387892	3.55632e-21	0.432527	1.53811e-14	0.433043	2.39935e-17	0.000510068	1	1.34277	0.156398	1.1425	0.6892	1.01631	0.956723
ENSG00000162971	TYW5	9.75723	6.9771	7.35994	7.00062	-0.482806	8.72422e-43	-0.406104	6.35813e-16	-0.477976	4.58883e-26	-0.0718749	0.604265	1.16481	0.464377	0.957333	0.895915	1.04078	0.893579
ENSG00000163214	DHX57	15.0517	13.9107	14.0891	12.9252	-0.113322	0.000224258	-0.0949628	0.0317401	-0.219142	6.67563e-09	-0.124185	0.0694221	0.827663	0.363737	1.06119	0.858774	0.756699	0.351175
ENSG00000163239	TDRD10	1.3495	0.67689	0.635788	0.652344	-0.991393	1.36129e-34	-1.08309	1.84148e-19	-1.04681	1.77386e-22	0.0363861	1	0.687164	0.0759133	0.434803	0.0135024	0.631351	0.131312
ENSG00000163319	MRPS18C	5.19897	8.03838	8.0029	7.83257	0.627375	7.38027e-73	0.621621	3.95425e-39	0.589663	4.11812e-42	-0.0319667	0.995982	1.2936	0.217465	0.847587	0.619977	1.73552	0.0665324
ENSG00000163412	EIF4E3	30.1597	20.6521	19.0504	20.3704	-0.545943	3.69509e-38	-0.662482	1.19413e-27	-0.565806	2.49929e-25	0.09668	0.516137	0.783093	0.239896	0.829812	0.575152	0.823743	0.515746
ENSG00000163510	CWC22	15.5464	20.2885	20.7652	20.3895	0.384337	7.33558e-49	0.41754	5.7823e-31	0.391517	1.07732e-32	-0.0260256	0.964429	1.00247	0.990585	0.770121	0.43481	0.566814	0.0541559
ENSG00000163577	EIF5A2	3.16472	10.0776	10.703	10.3025	1.66937	1.7286e-225	1.75633	1.67669e-154	1.70124	2.64579e-168	-0.0551205	0.942843	1.1857	0.414425	0.77825	0.453601	1.21916	0.508218
ENSG00000163584	RPL22L1	27.4278	24.8735	25.2776	24.0699	-0.141344	0.0769676	-0.117716	0.36514	-0.18865	0.07419	-0.070935	0.977057	1.60725	0.022399	1.59663	0.15726	1.17604	0.588446
ENSG00000163634	THOC7	27.6188	28.6244	29.2764	28.4811	0.0511077	0.147394	0.0838409	0.095836	0.0437751	0.375673	-0.0400668	0.893379	1.23484	0.312651	0.990796	0.977869	1.13758	0.667207
ENSG00000163659	TIPARP	16.9501	34.2052	36.3102	34.8851	1.01282	6.2772e-67	1.09882	4.04741e-45	1.04126	8.8164e-48	-0.0575635	0.971966	1.26278	0.262528	0.774239	0.444299	1.30679	0.369114
ENSG00000163682	RPL9	742.47	339.179	314.842	337.411	-1.13033	5.01331e-105	-1.23769	6.10952e-58	-1.13789	1.00932e-61	0.0997992	0.645774	0.68618	0.0716465	0.989779	0.975414	0.680054	0.195923
ENSG00000163684	RPP14	14.9864	11.6817	10.4707	11.6249	-0.358614	6.97879e-35	-0.515957	1.73446e-39	-0.365369	2.68262e-25	0.150599	0.00996832	0.540713	0.00290403	0.752414	0.394778	0.69224	0.214837
ENSG00000163694	RBM47	69.059	76.544	63.3276	85.3698	0.148459	0.0032147	-0.124994	0.0959581	0.305908	4.21018e-07	0.430905	2.28313e-06	1.06563	0.760918	0.770111	0.432641	1.32416	0.347734
ENSG00000163714	U2SURP	82.124	57.912	62.165	56.6744	-0.503751	1.39312e-69	-0.4016	4.59404e-23	-0.534886	4.69893e-48	-0.133287	0.036115	1.29993	0.209798	1.25447	0.496167	1.27746	0.416006
ENSG00000163798	SLC4A1AP	18.1821	19.4557	20.5038	18.6543	0.0984736	0.000491991	0.173779	7.5805e-06	0.0381011	0.364812	-0.135682	0.0243251	1.1632	0.468023	0.948689	0.874616	0.874886	0.653765
ENSG00000163811	WDR43	28.3822	28.1075	28.6883	28.6443	-0.0138912	0.82977	0.0156661	0.910377	0.0134412	0.915199	-0.00222493	1	1.57271	0.0298969	1.12319	0.727307	1.2693	0.425589
ENSG00000163874	ZC3H12A	19.2998	29.2918	29.8374	32.8008	0.601645	1.02158e-11	0.628248	1.75802e-07	0.764832	1.41801e-12	0.136586	0.797749	1.17356	0.442275	0.481714	0.0313909	1.71694	0.0698551
ENSG00000163877	SNIP1	11.1937	12.5855	12.78	11.967	0.169044	3.36854e-08	0.190635	7.80711e-06	0.0968145	0.0169759	-0.0938256	0.265997	1.02676	0.899592	0.623872	0.15568	1.0198	0.947881
ENSG00000163882	POLR2H	31.3862	36.8011	37.5061	37.5537	0.229122	1.26818e-07	0.256741	2.75637e-05	0.258431	2.93216e-06	0.00168899	1	1.18808	0.410725	1.06948	0.840512	1.41176	0.254753
ENSG00000163923	RPL39L	0.733367	4.90109	6.91006	3.85421	2.73357	2.13486e-214	3.22802	2.58758e-224	2.38687	5.11217e-135	-0.841354	3.78589e-08	1.2557	0.274836	1.27054	0.472187	0.988329	0.968597
ENSG00000163938	GNL3	86.2769	52.3336	53.8399	51.7421	-0.721108	2.24944e-65	-0.680163	4.85913e-28	-0.737473	7.02528e-40	-0.0573107	0.847766	1.7114	0.0102224	1.14386	0.686561	1.14079	0.660381
ENSG00000163950	SLBP	21.0079	32.0785	32.0729	32.5767	0.610844	1.23127e-53	0.610527	5.33154e-29	0.633111	3.37516e-37	0.0225825	1	1.22056	0.341219	1.00481	0.988541	1.1775	0.585588
ENSG00000164022	AIMP1	32.2738	34.8744	34.2689	34.6379	0.111298	8.28142e-05	0.086343	0.0402629	0.101365	0.00617041	0.0150221	1	1.08764	0.68805	1.25666	0.49485	1.12457	0.694228
ENSG00000164113	ADAD1	0.0149878	0.00236622	0.00260901	0.00203998	-1.81741	1.22533e-10	-1.72528	8.80467e-05	-1.87832	9.99335e-07	-0.159422	1	0.897763	0.727426	1.24077	0.653784	0.643909	0.349516
ENSG00000164163	ABCE1	44.9475	42.0121	44.9137	39.8719	-0.0973297	0.014023	-0.000998082	1	-0.172783	0.000592476	-0.171787	0.0473744	1.7179	0.00942583	1.48471	0.235619	1.34591	0.323206
ENSG00000164167	LSM6	7.00803	9.50372	9.36535	9.54628	0.43791	2.73682e-41	0.417699	2.76084e-20	0.443532	2.54291e-27	0.0258315	1	0.974818	0.903013	0.816251	0.547433	1.21467	0.513653
ENSG00000164329	PAPD4	30.6917	28.7011	28.8529	29.5229	-0.0964765	0.000560899	-0.0889332	0.0312209	-0.055918	0.149621	0.0330161	0.8962	0.988919	0.957391	0.754678	0.40353	1.0387	0.898877
ENSG00000164338	UTP15	6.87089	9.04845	9.32575	8.74612	0.397705	1.01159e-36	0.441548	2.02274e-24	0.348204	1.76465e-18	-0.0933529	0.31731	0.722762	0.121003	0.71915	0.332696	0.679897	0.193874
ENSG00000164342	TLR3	8.2779	12.8085	12.3064	13.9252	0.62952	7.89857e-21	0.57175	7.76791e-10	0.749969	2.07313e-19	0.178224	0.420921	1.53865	0.0402829	1.008	0.98094	1.30068	0.382373
ENSG00000164346	NSA2	65.5263	51.1263	51.2687	48.7911	-0.3581	2.06542e-21	-0.35396	7.37479e-11	-0.425696	3.08998e-18	-0.0717364	0.661675	0.889485	0.574496	0.981378	0.955029	0.597977	0.0831032
ENSG00000164347	GFM2	12.6115	14.5772	13.6736	13.7591	0.209629	7.7362e-09	0.117382	0.0224676	0.126772	0.00563068	0.00938968	1	0.667015	0.0510366	0.834603	0.587613	0.641298	0.135416
ENSG00000164362	TERT	0.0145544	0.330185	0.361912	0.315733	4.30396	1.38006e-83	4.41802	2.9639e-67	4.22914	6.44579e-67	-0.194318	0.969605	1.1842	0.417016	1.33457	0.384938	0.659286	0.167894
ENSG00000164548	TRA2A	55.872	43.9182	43.9216	44.8065	-0.3473	2.42647e-19	-0.347245	6.6288e-10	-0.318406	3.07966e-10	0.0288399	1	0.572844	0.00768965	0.738667	0.364642	0.398527	0.00174146
ENSG00000164587	RPS14	790.714	488.273	454.407	499.862	-0.695494	1.34494e-52	-0.79915	6.86842e-33	-0.661661	1.42382e-28	0.137489	0.296053	0.813748	0.322538	1.07392	0.830555	0.787566	0.42307
ENSG00000164609	SLU7	27.3762	34.7708	34.1156	33.5228	0.345086	1.14996e-30	0.31759	1.54432e-14	0.292417	7.41821e-15	-0.0251733	1	0.95819	0.838302	0.937346	0.846065	1.21677	0.514984
ENSG00000164610	RP9	8.85492	5.36253	5.31359	5.18449	-0.725155	1.98576e-61	-0.735988	1.0737e-30	-0.774219	4.01777e-41	-0.0382287	1	0.644439	0.0357798	0.859878	0.650819	0.555734	0.0501722
ENSG00000164880	INTS1	134.948	91.9917	90.7907	86.4967	-0.552914	2.94509e-42	-0.571822	9.78974e-23	-0.641725	2.42351e-34	-0.0699034	0.718096	0.704653	0.0922262	1.52108	0.207791	0.570236	0.0593429
ENSG00000164896	FASTK	66.2551	58.9993	55.0553	57.5002	-0.167448	0.000422524	-0.267175	7.22325e-05	-0.20449	0.000806034	0.0626862	0.845818	0.606812	0.016395	0.585095	0.108604	0.760852	0.360773
ENSG00000164902	PHAX	13.2022	22.435	22.6721	21.3138	0.764757	2.06325e-135	0.779759	2.37421e-79	0.690681	5.66658e-74	-0.0890834	0.339451	0.929915	0.727428	1.07681	0.824273	0.903596	0.733799
ENSG00000164934	DCAF13	19.9931	26.5676	28.8089	24.9548	0.410079	1.61169e-24	0.527004	7.06773e-22	0.319744	3.57706e-10	-0.207266	0.0191011	1.48288	0.0601644	2.59807	0.00427274	0.984437	0.9583
ENSG00000164941	INTS8	32.3173	22.1708	22.6672	22.2296	-0.543531	3.0449e-60	-0.511567	2.35465e-26	-0.539527	1.5627e-35	-0.0279594	1	1.2929	0.217127	1.43057	0.283148	0.796109	0.444418
ENSG00000164967	RPP25L	9.85406	13.2065	12.2159	13.1845	0.420627	6.28389e-18	0.308275	7.4117e-06	0.418769	7.98497e-12	0.110497	0.543065	0.665791	0.0503611	0.965876	0.917038	0.760761	0.357695
ENSG00000164985	PSIP1	26.7118	32.6865	30.7687	28.7106	0.291427	7.17514e-11	0.20419	0.000570632	0.104391	0.0657253	-0.0998012	0.480133	0.72364	0.120012	0.844248	0.613288	0.695538	0.220888
ENSG00000165055	METTL2B	16.0423	14.8946	14.2683	14.1535	-0.107934	0.00121934	-0.169241	0.000200978	-0.181121	8.81892e-06	-0.01188	1	0.718633	0.111518	0.875234	0.689546	0.821297	0.508466
ENSG00000165119	HNRNPK	284.695	349.957	357.622	342.242	0.297747	3.33879e-33	0.328992	1.87623e-21	0.265599	4.4379e-17	-0.0633932	0.449208	1.54437	0.0367669	0.82582	0.565883	1.28921	0.393975
ENSG00000165209	STRBP	22.3689	18.0393	16.8293	17.3251	-0.309973	7.04385e-14	-0.410167	2.01818e-12	-0.36809	2.1778e-12	0.0420798	0.947469	0.961386	0.850512	0.957668	0.896904	0.895914	0.712317
ENSG00000165271	NOL6	53.8966	37.329	37.2575	35.697	-0.52993	7.8298e-39	-0.532778	1.68902e-19	-0.594231	4.73474e-29	-0.0614541	0.802675	0.961944	0.852377	1.02841	0.933014	0.617292	0.106546
ENSG00000165275	TRMT10B	12.1374	6.49564	5.86215	6.58781	-0.901341	7.15969e-155	-1.0493	8.62799e-103	-0.88093	5.07188e-92	0.16839	0.0205285	0.558474	0.00510276	0.582077	0.109101	0.618717	0.106144
ENSG00000165359	DDX26B	7.80417	8.17963	8.25108	8.36455	0.0675879	0.214893	0.079666	0.331526	0.0997874	0.154858	0.0201222	1	0.530355	0.00267279	NA	NA	NA	NA
ENSG00000165424	ZCCHC24	21.6697	44.2675	46.8404	43.8366	1.03045	7.52016e-62	1.1119	9.71928e-41	1.01629	4.38791e-40	-0.0956142	0.807824	0.885729	0.561196	0.466633	0.0244358	0.703749	0.236339
ENSG00000165494	PCF11	46.3754	37.7935	36.5752	38.1877	-0.29492	2.26613e-20	-0.342346	1.19894e-13	-0.27999	1.63765e-11	0.0623574	0.651938	0.737778	0.145551	0.762679	0.41783	0.680361	0.194673
ENSG00000165496	RPL10L	0.0220675	0.0255097	0.0128021	0.0291363	0.189079	0.445912	-0.656258	0.0566606	0.392105	0.185029	1.0801	0.0260145	0.84047	0.404979	0.878334	0.696938	1.09273	0.766102
ENSG00000165502	RPL36AL	196.704	120.927	119.056	120.113	-0.701955	2.05959e-52	-0.724387	1.10064e-26	-0.711738	1.16849e-31	0.0126489	1	0.940545	0.768749	1.17273	0.632283	1.04262	0.888678
ENSG00000165506	DNAAF2	9.22978	8.60908	8.36056	8.40272	-0.0997666	0.00587836	-0.142074	0.00606198	-0.134715	0.00369007	0.00736026	1	0.744747	0.156435	1.00337	0.991953	0.616277	0.101875
ENSG00000165526	RPUSD4	35.9925	16.1881	17.3683	15.8584	-1.15288	6.73533e-222	-1.05125	3.21034e-88	-1.18252	1.81449e-135	-0.131268	0.143401	1.21316	0.355159	1.10256	0.769854	0.763681	0.364513
ENSG00000165630	PRPF18	3.69221	7.03816	6.95009	7.19198	0.931237	1.54545e-194	0.913867	4.27677e-104	0.961854	5.43796e-138	0.0479791	0.797506	1.18637	0.41199	0.933696	0.836906	1.04896	0.872905
ENSG00000165675	ENOX2	6.52212	9.68047	9.26769	9.33707	0.570077	2.63352e-58	0.507058	3.35072e-26	0.518271	1.08712e-32	0.0112093	1	1.0203	0.923237	1.54652	0.18805	0.835484	0.546941
ENSG00000165732	DDX21	91.8218	74.9308	76.6114	76.0551	-0.293207	2.41479e-06	-0.261239	0.00503021	-0.271721	0.0010467	-0.0104819	1	1.77195	0.00616646	1.3147	0.411012	1.38095	0.282789
ENSG00000165733	BMS1	39.839	41.559	42.4376	41.2195	0.0610528	0.0258957	0.0913577	0.0194307	0.0492982	0.189664	-0.0420602	0.77245	1.56108	0.032741	1.25932	0.490856	1.18297	0.573437
ENSG00000165799	RNASE7	0.305391	0.849044	1.07707	0.658147	1.46475	2.49621e-28	1.80547	2.1903e-26	1.09654	1.81853e-11	-0.709638	0.0133594	1.38146	0.120387	1.22236	0.546894	1.11677	0.710984
ENSG00000165819	METTL3	43.2178	20.0643	19.6756	19.4634	-1.10657	2.01971e-255	-1.1349	6.07785e-126	-1.15028	3.82295e-160	-0.0153781	1	0.568986	0.00747735	0.829869	0.577661	0.361891	0.000795574
ENSG00000165832	TRUB1	9.67126	12.3536	11.9582	12.0825	0.354291	1.46827e-19	0.307195	2.19748e-08	0.322384	8.0387e-11	0.015188	1	1.0358	0.866055	0.924681	0.814505	0.788367	0.424139
ENSG00000165934	CPSF2	29.6543	41.7849	43.209	40.1286	0.494925	1.04004e-49	0.54323	2.25427e-32	0.436638	3.36006e-25	-0.106594	0.264753	1.02731	0.897261	1.79122	0.0803337	0.76048	0.357041
ENSG00000166024	R3HCC1L	12.9519	13.1916	12.7018	13.7652	0.0263556	0.376313	-0.0276574	0.558108	0.0877735	0.010318	0.115436	0.050634	1.17721	0.436195	0.978452	0.947973	1.09999	0.750638
ENSG00000166133	RPUSD2	4.15083	6.76046	6.84066	6.56177	0.701313	1.75604e-73	0.719459	2.93797e-42	0.657896	3.76828e-42	-0.061577	0.793806	0.647366	0.0371646	0.631875	0.170724	0.775082	0.392557
ENSG00000166166	TRMT61A	19.6455	20.3409	19.8789	20.7257	0.0495862	0.355217	0.0166352	0.925798	0.0767871	0.265577	0.0601536	0.883553	0.805681	0.300189	1.51677	0.210927	0.566766	0.0586004
ENSG00000166173	LARP6	9.00951	12.9302	15.8952	10.9393	0.521303	4.66887e-26	0.819178	2.6792e-38	0.279829	4.51071e-06	-0.539378	5.43425e-10	0.811895	0.319613	1.11927	0.73678	0.649131	0.149049
ENSG00000166181	API5	61.1859	57.6976	57.1749	56.0625	-0.0843863	0.00193121	-0.0975408	0.0135914	-0.125789	0.000291388	-0.0282482	0.935694	1.15577	0.488784	0.985577	0.965235	0.900592	0.725916
ENSG00000166197	NOLC1	62.5237	70.5974	69.9425	72.2219	0.175312	6.0747e-05	0.161887	0.0110509	0.208174	0.000205262	0.0462872	0.940688	1.61329	0.0225853	1.34657	0.373231	1.02178	0.942527
ENSG00000166441	RPL27A	643.639	558.921	524.174	569.22	-0.203642	8.1582e-05	-0.296201	7.40317e-05	-0.1773	0.00996029	0.118901	0.508548	1.17018	0.450565	1.15866	0.658345	0.974823	0.931856
ENSG00000166783	KIAA0430	77.8236	59.4848	57.9984	60.1583	-0.387525	9.47844e-37	-0.424043	1.53608e-21	-0.371272	1.63926e-20	0.0527718	0.735378	1.4737	0.0643724	NA	NA	NA	NA
ENSG00000166831	RBPMS2	2.64876	3.73305	2.81358	4.28436	0.495287	2.23641e-07	0.0868168	0.625664	0.693857	3.28413e-09	0.607142	0.00209689	0.69513	0.0854748	0.39503	0.00647943	0.741236	0.316414
ENSG00000166889	PATL1	25.7271	40.2499	43.5641	41.1588	0.645691	3.08322e-65	0.759649	1.21581e-53	0.677946	7.80359e-51	-0.081705	0.554346	1.94109	0.00176422	1.21011	0.569041	1.26983	0.431328
ENSG00000166902	MRPL16	22.6568	21.7101	21.7794	22.1952	-0.0620408	0.04537	-0.0570443	0.230207	-0.0301628	0.532268	0.0268823	0.985572	1.70171	0.0107811	1.20548	0.576864	1.52532	0.158748
ENSG00000166938	DIS3L	29.0709	17.2869	16.0249	16.7615	-0.749148	1.88982e-99	-0.858439	7.77007e-66	-0.793548	3.70383e-70	0.0648953	0.666273	0.571799	0.00727205	0.646682	0.190223	0.725846	0.283435
ENSG00000166949	SMAD3	65.7731	95.7431	103.794	102.365	0.54171	2.37545e-22	0.65815	1.17895e-19	0.638204	5.36349e-22	-0.0199464	1	1.46628	0.0658096	1.03427	0.919488	1.43455	0.224671
ENSG00000166986	MARS	99.9327	66.5345	65.5404	61.2078	-0.58672	3.3289e-28	-0.608387	2.33327e-15	-0.707095	1.59073e-24	-0.0987088	0.668724	0.626018	0.0236963	0.795259	0.493658	0.751384	0.336169
ENSG00000167005	NUDT21	45.9237	56.9872	60.0796	55.6548	0.311456	1.28124e-24	0.387599	2.7821e-20	0.27735	7.09999e-13	-0.110251	0.164163	1.71213	0.010478	1.99323	0.0396127	0.919475	0.778678
ENSG00000167088	SNRPD1	12.8711	34.8974	32.2242	36.3509	1.43821	7.60516e-208	1.32348	3.57733e-103	1.49717	6.3087e-157	0.173683	0.158813	1.42833	0.0868392	1.54422	0.191654	1.49785	0.1734
ENSG00000167112	TRUB2	16.9944	24.6204	23.7973	23.2337	0.534245	8.97429e-55	0.485556	3.22786e-26	0.450702	4.15387e-27	-0.0348565	0.950537	0.752078	0.170467	0.579916	0.0984615	1.14845	0.642932
ENSG00000167118	URM1	52.8035	49.0367	48.2994	48.8906	-0.107099	0.00326675	-0.128772	0.0159189	-0.111346	0.0209922	0.0174264	1	0.969968	0.883978	0.737984	0.360186	1.70567	0.0757838
ENSG00000167136	ENDOG	4.76035	3.09553	2.82305	2.68714	-0.621963	3.45888e-17	-0.753593	6.17085e-13	-0.82517	1.83634e-18	-0.0715787	0.955667	0.778575	0.22923	0.775377	0.444106	0.920063	0.780323
ENSG00000167264	DUS2	4.44313	8.5819	9.00185	8.41429	0.9484	1.11696e-153	1.0179	8.31595e-100	0.920055	3.24151e-96	-0.0978633	0.392596	0.860801	0.471919	0.658493	0.213175	0.800128	0.454584
ENSG00000167272	POP5	12.5357	13.324	12.3537	13.8226	0.0869807	0.0427856	-0.0215232	0.854038	0.139675	0.00976771	0.161206	0.108855	0.749348	0.16584	0.771831	0.438743	0.863717	0.62291
ENSG00000167281	RBFOX3	0.665431	1.18051	0.395405	0.97399	0.829116	1.82779e-07	-0.743221	0.0010294	0.553065	0.00322767	1.29765	7.44022e-06	0.992744	0.972145	1.10034	0.774128	0.522496	0.0286164
ENSG00000167447	SMG8	9.17589	9.93152	10.3083	9.0487	0.114362	0.0191248	0.16774	0.0134525	-0.0198939	0.862272	-0.187646	0.0905207	0.741227	0.149836	0.892769	0.733903	0.476192	0.0113988
ENSG00000167526	RPL13	1604.89	889.247	851.206	877.528	-0.851837	1.36266e-50	-0.914888	1.97145e-27	-0.870978	7.46978e-31	0.0439107	1	0.917667	0.680487	1.168	0.641474	1.00837	0.977746
ENSG00000167658	EEF2	3983.21	1596.82	1501.71	1535.2	-1.31874	4.87283e-205	-1.40733	4.34199e-109	-1.37551	2.46333e-130	0.0318189	1	0.696311	0.0815666	0.915415	0.791155	0.937866	0.829988
ENSG00000167721	TSR1	30.0477	22.7931	22.5274	21.4139	-0.398287	5.14839e-28	-0.415165	6.77317e-16	-0.488217	5.7189e-26	-0.0730523	0.608209	0.935449	0.749137	0.959948	0.902997	0.6631	0.16787
ENSG00000167862	ICT1	11.8598	11.8364	11.8915	11.4479	-0.00390934	1	0.00367559	1	-0.0520745	0.46141	-0.055753	0.882137	0.85788	0.461911	NA	NA	NA	NA
ENSG00000167881	SRP68	95.7954	65.7218	66.7162	62.2408	-0.543564	2.14914e-49	-0.52185	8.52911e-23	-0.62204	1.65968e-38	-0.100191	0.375284	1.07302	0.736806	1.43168	0.285888	0.998257	0.995341
ENSG00000167962	ZNF598	74.049	31.0904	29.5822	32.1675	-1.25208	2.64582e-125	-1.32371	3.2873e-63	-1.20286	4.50485e-66	0.120857	0.511924	1.09989	0.647841	1.01919	0.954594	1.15165	0.6356
ENSG00000167978	SRRM2	1422.07	416.12	407.275	439.686	-1.7729	0	-1.8039	7.96067e-192	-1.69343	6.53115e-215	0.110475	0.346411	0.926674	0.715914	0.605569	0.138191	1.19084	0.558379
ENSG00000168002	POLR2G	21.1842	33.5288	36.1047	32.3014	0.661906	3.46057e-102	0.76902	2.85403e-77	0.607953	2.65e-57	-0.161072	0.0178515	1.09496	0.663407	0.627818	0.161383	0.899018	0.721523
ENSG00000168028	RPSA	1054.33	411.577	399.254	395.089	-1.35712	1.01226e-138	-1.40094	2.19059e-67	-1.4161	2.12089e-85	-0.0151584	1	1.06932	0.747892	1.10577	0.763186	1.0203	0.946262
ENSG00000168066	SF1	223.915	140.029	138.796	137.718	-0.677177	1.00653e-162	-0.689953	5.65033e-81	-0.701209	8.84943e-103	-0.0112558	1	0.640285	0.0337469	0.565154	0.0906642	0.815522	0.498509
ENSG00000168101	NUDT16L1	17.1613	16.7649	15.0628	15.9739	-0.033538	0.497979	-0.187543	0.00129958	-0.103135	0.0591201	0.0844127	0.578741	0.56515	0.0059523	0.882142	0.707012	0.714862	0.259052
ENSG00000168255	POLR2J3	6.19629	1.89016	1.77727	1.98052	-1.71224	2.08837e-131	-1.8003	1.12119e-63	-1.64528	6.89724e-68	0.15511	0.535355	0.918707	0.684473	0.999216	0.998125	0.75224	0.340993
ENSG00000168438	CDC40	16.1439	12.019	11.1781	11.764	-0.424426	6.77077e-26	-0.529449	3.47545e-20	-0.45533	1.08673e-18	0.0741251	0.681091	0.820195	0.345159	0.890137	0.730508	0.643124	0.137977
ENSG00000168488	ATXN2L	135.424	86.2605	89.8152	86.7125	-0.650663	4.06621e-75	-0.592434	9.02888e-31	-0.643098	6.89035e-44	-0.0506641	0.826708	1.09237	0.671667	0.909052	0.775087	1.10836	0.729986
ENSG00000168517	HEXIM2	1.83486	2.01379	1.89159	1.93978	0.132986	0.0104493	0.0435529	0.646949	0.0783473	0.274876	0.0348032	1	0.521962	0.0018586	1.47408	0.24808	0.539291	0.0392357
ENSG00000168566	SNRNP48	14.8512	9.69043	9.20867	10.0613	-0.61585	5.5902e-75	-0.689531	3.00078e-45	-0.561817	6.70312e-38	0.127725	0.130365	0.757148	0.184489	0.684641	0.264935	0.82168	0.511994
ENSG00000168724	DNAJC21	33.4773	35.6237	34.2879	35.3318	0.0897339	0.00288655	0.0347049	0.511219	0.0779244	0.0499463	0.0432202	0.812331	1.20186	0.381305	0.923688	0.812007	1.29831	0.385706
ENSG00000168806	LCMT2	6.2526	7.32235	7.2201	7.06364	0.227353	8.32443e-09	0.207018	0.000219763	0.175286	0.000597367	-0.0317359	1	0.699477	0.0867	0.656203	0.20575	0.906774	0.742694
ENSG00000168827	GFM1	30.1229	31.8059	32.0053	31.4928	0.0787759	0.0343072	0.0877087	0.110447	0.0645662	0.205878	-0.0231432	1	1.34601	0.157464	1.64752	0.13257	0.904113	0.73575
ENSG00000168872	DDX19A	25.5478	26.2645	27.421	25.8101	0.0401031	0.0956842	0.102275	0.00147097	0.0148677	0.714848	-0.0874096	0.106077	1.27769	0.239168	0.919696	0.801952	0.708992	0.247425
ENSG00000168883	USP39	25.8653	32.5079	33.7554	32.3668	0.329814	4.26427e-45	0.384374	3.93188e-33	0.323617	2.14575e-28	-0.0607585	0.425254	1.32585	0.177298	1.2861	0.451965	1.09558	0.759913
ENSG00000169045	HNRNPH1	387.616	181.553	181.795	182.134	-1.09418	2.22031e-252	-1.09229	9.28601e-115	-1.08958	1.26656e-141	0.0027135	1	0.722442	0.123019	0.627477	0.168959	0.582271	0.0720104
ENSG00000169057	MECP2	55.2866	49.0429	48.0332	46.8625	-0.17267	2.53907e-10	-0.202686	1.08109e-07	-0.238302	3.32034e-12	-0.0356157	0.851032	0.583139	0.00925511	0.536074	0.0608881	0.721017	0.270581
ENSG00000169062	UPF3A	42.2423	18.5577	17.2994	18.3099	-1.18662	1.6372e-157	-1.28774	7.95147e-86	-1.20598	1.19136e-94	0.0817708	0.670168	0.576974	0.00829639	0.783353	0.465518	0.646949	0.145858
ENSG00000169180	XPO6	55.0929	67.2897	70.3797	64.393	0.288471	1.21677e-28	0.353255	7.7306e-23	0.225097	1.10529e-11	-0.128159	0.0282019	0.993145	0.973689	0.978431	0.947842	0.516345	0.0242874
ENSG00000169217	CD2BP2	55.1312	64.6132	64.5717	64.7814	0.228539	1.14019e-16	0.227806	6.1439e-09	0.23225	5.38069e-11	0.00444322	1	1.00467	0.982158	0.53774	0.062226	0.966199	0.908199
ENSG00000169249	ZRSR2	11.2788	10.8813	10.8032	10.8774	-0.0517146	0.267004	-0.0621217	0.394399	-0.0522235	0.427569	0.00989903	1	0.963362	0.857956	0.727697	0.345049	1.3743	0.285276
ENSG00000169251	NMD3	48.6073	38.2784	41.6657	36.8521	-0.344672	6.61976e-16	-0.222358	0.00037796	-0.399422	5.21782e-13	-0.177067	0.0783338	1.88325	0.00288422	1.70737	0.109301	1.56427	0.142286
ENSG00000169288	MRPL1	10.2706	12.0258	12.0828	11.7516	0.226601	1.87814e-13	0.234502	6.54698e-08	0.192783	1.05877e-06	-0.0417222	0.858864	1.10305	0.638281	1.26646	0.48024	1.02946	0.922441
ENSG00000169297	NR0B1	0.849891	1.54879	0.719763	0.970303	0.863598	1.19432e-06	-0.239019	0.440318	0.190562	0.452333	0.429906	0.444062	0.736106	0.141031	0.596222	0.121904	0.696678	0.223918
ENSG00000169371	SNUPN	9.87479	10.6322	10.7727	10.6904	0.106429	0.00047209	0.125917	0.00384171	0.113709	0.00377171	-0.0122089	1	1.1994	0.383009	1.41792	0.295381	1.09943	0.7505
ENSG00000169385	RNASE2	0.59201	1.18092	1.47477	1.13178	0.987816	1.0195e-12	1.30711	6.06238e-13	0.92642	6.00903e-08	-0.380955	0.373577	1.14075	0.52739	0.799605	0.501386	0.902788	0.731539
ENSG00000169397	RNASE3	0.040413	0.0775355	0.101479	0.0722423	0.87678	1.00552e-07	1.24738	3.83138e-09	0.776311	0.00013653	-0.475406	0.302481	0.911942	0.658399	1.09817	0.779012	0.766669	0.371543
ENSG00000169413	RNASE6	2.77533	13.6057	14.5942	12.7552	2.29077	2.21925e-107	2.39176	1.3658e-75	2.19757	1.50298e-72	-0.194228	0.683172	0.912421	0.660825	0.720609	0.326462	0.835977	0.547469
ENSG00000169564	PCBP1	119.157	115.065	118.381	117.537	-0.0504619	0.259696	-0.00950196	1	-0.0197807	0.824131	-0.0102788	1	1.19641	0.38926	0.65592	0.208856	1.26776	0.425196
ENSG00000169612	FAM103A1	3.60124	6.65897	6.3956	6.8303	0.885966	6.36897e-131	0.827653	4.35034e-63	0.922324	5.7703e-94	0.0946684	0.433559	1.61486	0.0218237	1.95875	0.0427266	1.01723	0.95442
ENSG00000169714	CNBP	266.61	198.207	209.816	193.976	-0.427706	8.61048e-37	-0.345583	1.33894e-12	-0.458849	1.43525e-25	-0.113266	0.211698	1.79087	0.0054447	1.21989	0.552808	1.76793	0.0576926
ENSG00000169718	DUS1L	117.643	61.3623	56.9586	61.034	-0.939187	1.53651e-92	-1.0464	6.89773e-54	-0.946865	1.77316e-55	0.099539	0.55928	0.878941	0.535834	1.29284	0.442566	0.812493	0.485457
ENSG00000169800	RBMY1F	0	0	0	0	0	1	0	1	0	1	0	1	0	0	NA	NA	NA	NA
ENSG00000169813	HNRNPF	103.662	162.753	163.171	171.977	0.650718	3.68204e-58	0.654415	6.15399e-33	0.730251	5.95659e-49	0.0758362	0.684769	1.5808	0.0298114	1.225	0.544449	1.13099	0.685632
ENSG00000169871	TRIM56	10.4485	70.2234	71.6141	68.3478	2.74766	0	2.77594	0	2.70861	0	-0.0673418	0.78846	1.01143	0.956615	1.2807	0.457509	0.552985	0.0442458
ENSG00000169957	ZNF768	29.5718	35.0324	33.7535	36.3677	0.244114	5.62947e-12	0.190596	0.000180425	0.298152	2.88083e-11	0.107558	0.300386	0.786557	0.250214	0.847782	0.619923	0.79222	0.434656
ENSG00000169972	PUSL1	9.69024	8.59251	8.56437	8.61532	-0.174375	0.00194886	-0.178694	0.033658	-0.170324	0.0235439	0.0083715	1	1.12697	0.566332	1.20995	0.569324	1.22703	0.49192
ENSG00000169976	SF3B5	43.9669	48.0966	44.4459	47.005	0.129166	0.00361769	0.0156396	0.918844	0.0960394	0.102317	0.0804008	0.66832	0.652298	0.0412897	0.852452	0.636414	0.799582	0.4532
ENSG00000170144	HNRNPA3	237.67	169.909	176.21	167.283	-0.484147	1.46591e-74	-0.43163	2.63545e-29	-0.506615	2.41945e-48	-0.0749848	0.354596	0.986448	0.948021	1.11376	0.746789	0.514197	0.0247893
ENSG00000170365	SMAD1	7.9762	11.2701	11.7515	10.4735	0.499267	4.92871e-28	0.559352	2.35159e-19	0.393554	7.97445e-12	-0.16581	0.15773	1.14478	0.516769	1.23727	0.524803	0.922721	0.787337
ENSG00000170445	HARS	48.5308	44.8588	44.5247	43.8481	-0.11367	2.51465e-05	-0.124434	0.00148719	-0.14663	2.52759e-05	-0.0221963	1	0.677445	0.0624072	0.620511	0.158799	0.885946	0.684503
ENSG00000170473	PYM1	15.6434	22.581	22.2121	23.0253	0.528963	9.28511e-62	0.505802	1.98537e-30	0.556811	4.06108e-44	0.051009	0.784207	0.788525	0.255203	0.753677	0.401303	1.10179	0.74504
ENSG00000170515	PA2G4	81.489	82.4987	85.3562	81.5882	0.0175912	0.737849	0.0668178	0.283369	0.00152334	1	-0.0652949	0.73165	1.50159	0.0510041	1.13696	0.700421	1.61493	0.108874
ENSG00000170748	RBMXL2	0.0272583	0.0132243	0.0094481	0.0151777	-0.934087	5.14448e-07	-1.27143	4.04748e-06	-0.777445	0.00224497	0.518428	0.371364	0.876505	0.528553	1.15665	0.666564	0.595342	0.0804347
ENSG00000170860	LSM3	19.0151	23.8011	24.4745	22.3354	0.323626	3.70555e-19	0.364288	2.78384e-13	0.231903	5.13257e-07	-0.132389	0.15278	1.17902	0.430868	1.52796	0.20287	0.954515	0.876185
ENSG00000170889	RPS9	1008.24	601.495	556.033	587.454	-0.745241	2.00152e-42	-0.858596	5.51481e-27	-0.779317	8.5064e-28	0.0792799	0.817736	0.903488	0.62662	1.08632	0.803786	1.02822	0.925787
ENSG00000170892	TSEN34	32.229	33.2354	33.2892	31.9338	0.0439844	0.306417	0.0463864	0.49818	-0.0135636	0.910797	-0.0599512	0.786349	0.586401	0.0100261	0.639549	0.176991	0.813025	0.487701
ENSG00000170935	NCBP2L	0.0735494	0.0440919	0.017503	0.0192179	-0.741862	0.000416113	-1.90617	6.73199e-12	-1.92851	2.22933e-13	-0.0218387	1	0.851225	0.442036	0.919612	0.802643	0.832797	0.543812
ENSG00000171103	TRMT61B	4.25381	6.11351	5.98729	6.18309	0.524793	9.0846e-52	0.493431	7.59495e-25	0.541604	1.21957e-35	0.0481708	0.852182	1.25518	0.274802	0.98781	0.970649	0.963876	0.901998
ENSG00000171262	FAM98B	14.2292	21.1362	21.1118	20.7702	0.57108	3.25069e-66	0.569378	1.1844e-35	0.545685	3.46423e-39	-0.0236955	1	0.942657	0.77704	1.03202	0.924664	0.827264	0.52505
ENSG00000171311	EXOSC1	17.0572	16.7847	16.4254	17.3537	-0.0238162	0.591023	-0.0539863	0.37146	0.0242919	0.696437	0.0782811	0.546966	1.01302	0.95055	0.758942	0.409386	1.0081	0.97846
ENSG00000171421	MRPL36	10.8126	11.247	10.7751	10.6071	0.0554207	0.254643	-0.00503391	1	-0.0290071	0.729973	-0.0239745	1	0.786025	0.247529	0.984523	0.962678	0.91894	0.776753
ENSG00000171490	RSL1D1	134.629	107.634	108.749	107.697	-0.322942	3.62614e-15	-0.307949	2.95061e-07	-0.322161	2.30338e-09	-0.0142117	1	1.7543	0.00739667	1.57234	0.173568	1.34621	0.326786
ENSG00000171566	PLRG1	28.1291	30.113	30.5054	29.2645	0.0984594	5.34694e-05	0.117242	0.000678316	0.0570251	0.0845545	-0.0602186	0.446668	0.812936	0.320192	1.4078	0.303247	0.754897	0.344169
ENSG00000171824	EXOSC10	42.8328	43.5803	44.8879	42.2539	0.0251408	0.358042	0.0675969	0.061046	-0.0193409	0.632268	-0.0869391	0.148697	1.48704	0.0569004	0.84499	0.612934	1.15437	0.630627
ENSG00000171858	RPS21	228.273	278.355	257.127	266.248	0.2861	1.01417e-06	0.171715	0.0470118	0.221954	0.00329934	0.0502398	1	1.03902	0.854488	1.3132	0.412977	0.958359	0.886802
ENSG00000171861	RNMTL1	18.7748	8.40502	7.43136	8.21156	-1.16067	1.18456e-142	-1.3365	5.96528e-92	-1.19459	4.79114e-93	0.141926	0.229744	0.634161	0.0300351	NA	NA	NA	NA
ENSG00000171863	RPS7	535.928	287.128	286.558	272.95	-0.900408	2.22331e-81	-0.903204	5.0412e-39	-0.97347	3.83859e-55	-0.0702651	0.805755	1.28324	0.232252	1.49554	0.230675	1.2611	0.438337
ENSG00000171865	RNASEH1	9.86336	10.29	10.8749	10.1568	0.0619102	0.0903642	0.141404	0.00403301	0.0433865	0.408249	-0.0980242	0.321361	1.4106	0.098598	1.21206	0.563361	0.773578	0.388002
ENSG00000171960	PPIH	7.46855	14.0833	14.647	13.5222	0.91413	3.29942e-104	0.971242	1.00069e-65	0.855455	3.14203e-60	-0.115798	0.393815	1.3064	0.200274	0.984503	0.962628	1.05534	0.856932
ENSG00000172053	QARS	138.619	126.607	123.26	124.584	-0.130904	0.000707032	-0.169444	0.00247615	-0.154081	0.00222089	0.0153623	1	0.940296	0.767781	0.493747	0.0330747	0.927568	0.800895
ENSG00000172062	SMN1	4.31426	2.76349	2.82518	2.7326	-0.641297	4.58401e-43	-0.60814	3.60162e-19	-0.658453	7.18189e-27	-0.0503126	0.94391	0.966	0.868235	1.53061	0.20456	0.680032	0.194107
ENSG00000172071	EIF2AK3	66.1122	18.7412	16.497	18.7976	-1.81841	2.30727e-232	-2.00232	4.57901e-125	-1.81395	3.53788e-132	0.18838	0.171016	1.17028	0.450748	1.19489	0.593306	0.880735	0.670002
ENSG00000172171	TEFM	4.87956	3.64685	3.53915	3.62923	-0.420452	6.97886e-35	-0.463367	3.44362e-21	-0.42783	3.44848e-22	0.0355496	0.945791	0.826072	0.358864	1.30198	0.427934	0.72285	0.274351
ENSG00000172172	MRPL13	10.2117	19.566	20.84	18.8455	0.937662	2.88556e-123	1.029	1.0347e-83	0.883443	1.25983e-72	-0.145562	0.165042	1.51952	0.0465438	2.46725	0.0071015	1.12778	0.690131
ENSG00000172183	ISG20	4.60617	32.2838	28.5809	36.3905	2.80825	1.20893e-257	2.63244	3.23833e-154	2.98092	5.42428e-225	0.348464	0.073306	1.08385	0.699295	0.850505	0.628887	0.743176	0.317803
ENSG00000172239	PAIP1	33.21	32.7261	33.7687	30.9142	-0.0210653	0.588289	0.0242814	0.705347	-0.103107	0.0147452	-0.127391	0.0892408	1.64425	0.018129	1.58357	0.17014	0.937211	0.829851
ENSG00000172336	POP7	13.4114	15.899	15.4111	15.0691	0.244741	1.06982e-07	0.200599	0.00225747	0.167475	0.00514113	-0.0331261	1	1.06963	0.74731	1.51525	0.212048	1.17323	0.59396
ENSG00000172346	CSDC2	81.9713	4.1757	4.14476	4.21369	-4.29528	8.81679e-181	-4.30528	1.20622e-72	-4.28278	1.5283e-91	0.0225294	1	1.07623	0.724612	0.979441	0.950383	1.08697	0.780109
ENSG00000172409	CLP1	6.63763	8.07039	8.27949	7.96967	0.281127	1.49096e-09	0.317948	1.18439e-06	0.263147	1.10873e-05	-0.0548083	0.90609	1.22609	0.331619	1.20766	0.573168	0.675985	0.18721
ENSG00000172432	GTPBP2	61.8353	43.3593	46.2376	43.7956	-0.512082	3.08865e-34	-0.419421	3.21385e-12	-0.497631	3.93894e-20	-0.07821	0.668275	1.10937	0.618566	0.930015	0.828704	1.09021	0.772047
ENSG00000172493	AFF1	112.86	67.1882	63.9536	67.6359	-0.747958	5.60224e-83	-0.819212	6.15632e-47	-0.738376	1.10202e-47	0.0808376	0.599008	1.19303	0.397131	1.16656	0.64363	1.15739	0.624412
ENSG00000172590	MRPL52	20.9902	32.2398	31.1245	33.3827	0.61878	5.90887e-39	0.568283	4.3769e-18	0.669064	1.25589e-29	0.100782	0.603002	1.18082	0.426606	1.37328	0.342277	0.953858	0.87437
ENSG00000172667	ZMAT3	22.23	27.6866	27.9356	26.7006	0.316798	7.78076e-10	0.329735	5.54348e-06	0.264388	7.10697e-05	-0.0653491	0.882081	1.07812	0.718283	0.771977	0.442676	1.11744	0.711131
ENSG00000172733	PURG	0.101944	0.36167	0.402991	0.345174	1.79021	1.17139e-63	1.94098	2.98537e-45	1.72031	9.3934e-41	-0.221645	0.580064	0.734529	0.139753	0.536069	0.0608847	0.745513	0.322985
ENSG00000172795	DCP2	18.3528	24.3198	25.0512	23.9482	0.406075	1.12117e-38	0.448486	2.94811e-25	0.383848	2.54154e-22	-0.0646412	0.613281	0.99842	0.993956	0.54365	0.0744718	1.0992	0.75151
ENSG00000172809	RPL38	241.351	243.49	222.099	232.233	0.0126477	0.917295	-0.119934	0.185399	-0.0556313	0.553514	0.064303	0.914741	1.11437	0.603441	1.17519	0.627801	0.934245	0.81955
ENSG00000172922	RNASEH2C	24.3534	23.0527	21.9758	22.8068	-0.0797189	0.0688313	-0.14825	0.0164485	-0.0953563	0.098664	0.0528951	0.868897	0.635866	0.0310356	0.745934	0.380463	0.787679	0.427988
ENSG00000173113	TRMT112	40.8154	76.4221	82.0816	73.5677	0.904711	2.18285e-125	1.00788	5.53418e-88	0.849755	1.28195e-73	-0.158122	0.0908898	1.22806	0.324689	1.23917	0.519852	1.1899	0.564081
ENSG00000173141	MRPL57	22.1474	28.6752	24.9881	28.9116	0.372095	2.59076e-19	0.173964	0.00302436	0.383991	2.67158e-14	0.210031	0.0177928	0.771458	0.213811	1.48737	0.231301	0.85174	0.592314
ENSG00000173145	NOC3L	11.6052	11.4967	12.0271	11.1842	-0.0128284	0.810488	0.052438	0.394043	-0.0527558	0.326629	-0.105199	0.317097	1.19821	0.385279	0.972972	0.934486	0.815494	0.494121
ENSG00000173431	RNASE8	0.00726215	0.00582144	0.0037985	0.00769078	-0.219516	0.538814	-0.639823	0.123542	0.0577302	0.917014	0.760495	0.332104	0.854005	0.505805	0.485079	0.0982946	1.0942	0.775814
ENSG00000173464	RNASE11	0.0064458	0	0	0	-1.89975	1.99537e-13	-1.79804	2.14235e-05	-1.824	7.67153e-07	0	1	0	0	NA	NA	NA	NA
ENSG00000173545	ZNF622	49.2644	26.3393	24.4187	25.6076	-0.903851	1.72453e-87	-1.01256	1.20867e-52	-0.944354	3.28052e-57	0.0682139	0.798955	0.967167	0.873062	1.12593	0.721813	0.971123	0.922654
ENSG00000173627	APOBEC4	0.0214641	0.103952	0.124173	0.0636841	2.18549	7.41942e-22	2.42414	1.72525e-18	1.49547	3.74734e-08	-0.937962	0.0657205	0.622286	0.0228039	0.449975	0.0164692	0.680759	0.199851
ENSG00000173674	EIF1AX	58.5325	45.405	45.0974	45.6949	-0.366283	3.27975e-19	-0.376084	3.09946e-10	-0.357091	2.96965e-11	0.0189942	1	1.16976	0.4517	1.16599	0.645183	1.28834	0.395243
ENSG00000173681	CXorf23	13.0586	10.5655	10.0037	11.1515	-0.305298	1.08111e-20	-0.384078	2.26393e-16	-0.227493	7.69151e-08	0.156596	0.0323562	0.883334	0.552012	0.791015	0.483576	0.806429	0.470672
ENSG00000173744	AGFG1	46.4891	57.8121	58.9082	59.5902	0.314425	6.49236e-18	0.341409	1.42468e-11	0.358139	4.778e-15	0.0167295	1	1.25124	0.282439	1.12059	0.732939	0.992837	0.980881
ENSG00000173786	CNP	44.2751	78.1327	79.2367	75.8029	0.819124	3.87124e-188	0.839416	1.09245e-108	0.775483	3.43363e-110	-0.063934	0.547992	0.655291	0.0423454	0.563998	0.0859189	0.568101	0.0561249
ENSG00000173809	TDRD12	0.144102	0.212289	0.328304	0.110113	0.548415	0.000516414	1.16737	3.28403e-09	-0.372616	0.0812084	-1.54527	2.08288e-08	0.854902	0.452651	1.18134	0.616698	0.57096	0.0574044
ENSG00000173812	EIF1	532.939	397.366	381.749	385.991	-0.423532	1.17513e-21	-0.481353	5.65938e-14	-0.465443	5.96747e-16	0.01591	1	0.712252	0.10332	0.671317	0.23537	0.838938	0.555423
ENSG00000173818	ENDOV	12.8655	11.6156	11.1047	11.2594	-0.147757	0.000268607	-0.212202	0.00022309	-0.192602	0.000200507	0.0196023	1	0.67818	0.0639794	1.12036	0.733397	0.604943	0.098543
ENSG00000173914	RBM4B	13.894	10.3421	10.3051	9.87739	-0.425443	9.02051e-41	-0.430467	1.98228e-21	-0.492082	2.1807e-33	-0.0616166	0.647734	0.606298	0.0162098	0.748595	0.384103	0.707877	0.245246
ENSG00000173933	RBM4	68.0758	9.12695	9.7256	8.77821	-2.89791	0	-2.80648	0	-2.95435	0	-0.14787	0.0251869	1.25864	0.269337	0.776339	0.447044	1.22984	0.495807
ENSG00000174173	TRMT10C	8.27659	13.525	13.5115	13.6286	0.707461	6.70028e-77	0.706402	1.05622e-41	0.718439	1.71496e-51	0.0120333	1	1.33442	0.166629	1.02408	0.943097	1.60906	0.114581
ENSG00000174177	CTU2	11.3142	11.0202	11.3529	10.4729	-0.0387535	0.424385	0.00492824	1	-0.112042	0.049219	-0.116976	0.342502	0.621403	0.0228164	0.91336	0.78597	0.602328	0.0895605
ENSG00000174231	PRPF8	201.348	171.669	154.007	157.106	-0.230013	3.80281e-10	-0.386606	6.63268e-17	-0.357863	8.29202e-18	0.0287428	0.997438	0.748231	0.163148	0.859157	0.649005	0.755761	0.349023
ENSG00000174243	DDX23	71.0201	84.3527	80.3198	85.5741	0.248161	7.04917e-17	0.1775	3.11472e-05	0.26891	9.75936e-13	0.0914097	0.291857	0.972216	0.892604	1.46094	0.255545	0.823206	0.513496
ENSG00000174371	EXO1	0.187314	2.8732	3.09419	2.78476	3.91666	5.7846e-213	4.02177	1.54886e-165	3.87071	8.64358e-169	-0.151539	0.881341	1.46351	0.0684841	2.03445	0.0338932	0.859166	0.610406
ENSG00000174444	RPL4	1563.03	891.788	907.916	858.904	-0.809588	1.93573e-92	-0.783709	3.10927e-41	-0.863801	1.02096e-60	-0.0800921	0.619907	0.987217	0.950814	1.5356	0.197532	0.721731	0.272995
ENSG00000174547	MRPL11	21.8746	24.5192	25.8151	23.9773	0.16389	1.40979e-05	0.238875	5.89901e-06	0.131523	0.00788354	-0.107355	0.339739	1.27061	0.250038	1.20254	0.581865	0.850378	0.58713
ENSG00000174606	ANGEL2	24.7288	17.0548	16.013	18.0446	-0.535567	4.68045e-70	-0.626538	6.68174e-47	-0.45396	1.71577e-31	0.172586	0.00666667	0.565575	0.00602021	0.670219	0.229753	0.607541	0.0919774
ENSG00000174720	LARP7	18.7212	27.4337	26.3724	27.1899	0.551166	4.68279e-89	0.49414	2.31118e-39	0.538195	5.5777e-56	0.0440553	0.782056	0.881373	0.544899	0.948937	0.875043	0.884835	0.681409
ENSG00000174740	PABPC5	0.373378	0.991153	0.910528	0.888768	1.40008	2.28815e-61	1.2765	1.05546e-30	1.24275	3.57023e-34	-0.0339127	1	0.722194	0.120098	0.651449	0.20654	0.975885	0.93476
ENSG00000174748	RPL15	803.988	481.503	477.886	456.094	-0.739654	2.16172e-95	-0.750496	3.75356e-48	-0.817874	1.65881e-69	-0.0673784	0.65738	0.634166	0.0294429	0.722181	0.329719	0.998934	0.997147
ENSG00000174780	SRP72	88.529	65.8921	67.4346	60.8615	-0.42596	5.15836e-27	-0.392541	4.06324e-12	-0.54049	3.24513e-26	-0.147949	0.129342	1.57369	0.0301825	1.49138	0.230281	1.05468	0.858573
ENSG00000174840	PDE12	19.4189	20.5967	18.9743	21.0128	0.0853217	0.0281939	-0.0332234	0.647778	0.114294	0.020184	0.147522	0.0989695	0.918046	0.68194	0.692422	0.279622	1.47443	0.195475
ENSG00000174891	RSRC1	7.67011	12.4909	13.1124	11.9203	0.703503	3.22068e-105	0.773412	1.19764e-70	0.636335	1.00494e-56	-0.137088	0.0763216	1.22932	0.324118	1.14054	0.693445	1.085	0.784777
ENSG00000174953	DHX36	31.0455	33.6364	35.9138	31.4146	0.115998	0.00110033	0.210301	1.50851e-05	0.0174607	0.810219	-0.192844	0.00784465	1.28827	0.225964	1.03669	0.914041	1.00754	0.980154
ENSG00000175110	MRPS22	19.4011	18.4723	18.8409	18.2769	-0.0709607	0.042284	-0.0421389	0.481818	-0.0863319	0.0603966	-0.0441942	0.855732	2.25478	0.000120952	1.87727	0.0610953	1.6435	0.102569
ENSG00000175324	LSM1	7.59389	13.7913	14.6319	13.5879	0.860183	2.93126e-122	0.945884	1.70591e-83	0.838302	1.6671e-77	-0.107593	0.330544	1.46163	0.0687047	1.54933	0.186187	1.14852	0.646104
ENSG00000175376	EIF1AD	16.5542	20.035	21.7097	19.5181	0.275241	1.45944e-23	0.390747	3.8924e-26	0.237854	3.60454e-12	-0.152898	0.00731881	1.55837	0.0346496	0.709329	0.300492	1.50034	0.179468
ENSG00000175387	SMAD2	40.6202	49.5118	50.6234	46.9639	0.285459	7.47162e-21	0.317454	5.05367e-14	0.209199	7.58508e-08	-0.108258	0.173568	0.941037	0.770667	1.09339	0.788747	0.745086	0.322037
ENSG00000175467	SART1	51.0163	60.5772	64.3051	58.9568	0.247604	1.04772e-16	0.33392	5.31567e-16	0.20851	4.45269e-08	-0.125412	0.0788012	1.07436	0.730818	1.32592	0.398741	0.770892	0.382513
ENSG00000175573	C11orf68	21.9895	31.4151	33.9536	30.9272	0.514128	7.84427e-60	0.626362	5.42875e-50	0.491528	7.41656e-37	-0.134838	0.0685475	0.909018	0.647903	0.646889	0.190554	0.867759	0.634052
ENSG00000175581	MRPL48	14.5896	13.6429	13.6741	13.831	-0.097294	0.0174928	-0.0931555	0.13277	-0.0776913	0.170917	0.0154652	1	1.13484	0.544209	1.50985	0.216053	0.866332	0.630792
ENSG00000175718	RBMXL3	0.00344221	0.00122515	0.00143482	0.000902392	-0.775944	0.0071282	-0.62601	0.195702	-0.849074	0.0218807	-0.256341	1	1.38891	0.401342	4.04756	0.0042856	1.91738	0.267603
ENSG00000175766	EIF4E1B	0.0994691	0.115941	0.0948691	0.0736525	0.22133	0.304625	-0.0532824	0.998813	-0.414291	0.135669	-0.363498	0.65482	0.82538	0.357094	0.936583	0.844152	0.910644	0.753526
ENSG00000175792	RUVBL1	14.7706	33.2083	37.0559	31.2238	1.16839	3.96312e-192	1.32673	5.33458e-148	1.07941	1.25157e-113	-0.247321	0.00250038	1.17189	0.446784	1.67557	0.122636	0.952603	0.870644
ENSG00000176102	CSTF3	13.9669	18.7535	18.646	18.2699	0.425285	3.06017e-44	0.417042	4.04193e-23	0.387621	5.32556e-24	-0.0294229	0.97497	0.930361	0.729155	1.35013	0.368981	1.00223	0.99404
ENSG00000176444	CLK2	66.0888	33.77	32.5895	36.9919	-0.968829	1.96871e-130	-1.02006	5.29837e-71	-0.83745	5.2306e-61	0.18261	0.035674	0.816872	0.33222	0.579902	0.106613	0.70611	0.240884
ENSG00000176624	MEX3C	18.1246	24.0173	26.278	22.3901	0.406488	2.42157e-21	0.53603	4.28978e-20	0.305409	2.17251e-08	-0.230628	0.0126277	1.29878	0.210359	1.58801	0.162206	0.818683	0.502449
ENSG00000177192	PUS1	16.8008	17.1566	15.6426	18.6274	0.0296434	0.650577	-0.103223	0.217452	0.148262	0.0309713	0.251494	0.0281674	0.847857	0.429099	0.82227	0.558981	0.680401	0.196523
ENSG00000177469	PTRF	60.9266	252.617	304.325	227.284	2.0517	2.30625e-280	2.32034	1.50764e-240	1.89923	7.81676e-182	-0.421114	0.000161524	1.15822	0.48088	NA	NA	NA	NA
ENSG00000177483	RBM44	0.752255	0.548284	0.604201	0.583033	-0.450612	1.985e-06	-0.311178	0.0278288	-0.363356	0.00356166	-0.0522022	1	1.07071	0.743658	0.700226	0.294708	1.52079	0.159221
ENSG00000177600	RPLP2	537.013	559.367	514.725	552.32	0.0588092	0.374872	-0.0611492	0.574646	0.0405224	0.688961	0.101672	0.716563	0.824534	0.356928	0.819618	0.555609	0.860461	0.61396
ENSG00000177613	CSTF2T	23.2059	25.6521	25.1761	25.6211	0.14462	2.54177e-06	0.1175	0.0089557	0.142789	0.000328384	0.0252896	1	0.794118	0.269679	0.897423	0.745679	0.633104	0.126566
ENSG00000177679	SRRM3	4.20613	6.89338	5.95928	5.22079	0.711399	1.0918e-18	0.500932	1.36695e-06	0.309744	0.00144076	-0.191215	0.436918	0.596582	0.0136369	0.548664	0.0714824	0.84069	0.562477
ENSG00000177700	POLR2L	69.5434	60.9598	60.5711	58.0499	-0.190138	0.00104247	-0.199188	0.0206089	-0.260727	0.000542211	-0.0615392	0.930423	0.875819	0.526992	0.990739	0.977869	0.736575	0.309169
ENSG00000177733	HNRNPA0	84.5444	123.331	123.498	119.698	0.54468	8.07655e-99	0.546657	9.40583e-54	0.501539	3.18067e-54	-0.0451191	0.732176	0.461451	0.000292613	0.374775	0.00605757	0.857619	0.608309
ENSG00000177954	RPS27	669.273	498.408	456.186	489.834	-0.425303	2.87961e-14	-0.55297	8.46225e-12	-0.450332	5.57357e-10	0.102637	0.68204	0.977971	0.914943	0.861025	0.653706	0.723991	0.277662
ENSG00000177971	IMP3	25.6185	28.1189	25.8841	29.8502	0.134033	0.000537278	0.0150116	0.903445	0.220144	4.96643e-06	0.205137	0.0115241	0.909329	0.648462	1.09663	0.781924	1.07464	0.809585
ENSG00000178105	DDX10	17.0242	18.0626	19.3681	17.4682	0.0856478	0.0175289	0.186414	0.000137542	0.0373673	0.493808	-0.149052	0.0620537	1.78081	0.00572143	1.80033	0.0810393	0.867386	0.633694
ENSG00000178149	DALRD3	35.4576	16.7556	17.9832	15.9223	-1.08189	1.34032e-175	-0.979622	1.10559e-68	-1.15551	7.04108e-115	-0.175888	0.0391914	0.978995	0.918925	0.63775	0.174232	0.964951	0.904951
ENSG00000178199	ZC3H12D	0.528059	2.28515	2.41543	2.18596	2.10383	7.29679e-91	2.18311	1.27291e-61	2.03983	1.46455e-61	-0.143445	0.844129	0.751588	0.174405	0.494948	0.0385552	0.617225	0.106467
ENSG00000178607	ERN1	160.234	31.9546	25.175	30.248	-2.32601	6.08785e-217	-2.66993	3.52025e-130	-2.40519	3.23484e-138	0.26475	0.0986632	0.841554	0.407928	1.19627	0.590333	1.0036	0.990376
ENSG00000178691	SUZ12	23.5346	26.8474	27.0115	26.6904	0.190218	6.74541e-08	0.198863	7.52556e-05	0.1818	6.60701e-05	-0.0170641	1	0.951018	0.809691	1.16415	0.648093	0.742915	0.318183
ENSG00000178694	NSUN3	6.45589	6.31068	6.09331	6.56085	-0.0308703	0.385513	-0.0821992	0.0936435	0.0252403	0.655251	0.10745	0.205581	1.3619	0.140337	0.919354	0.801091	1.41275	0.253783
ENSG00000178718	RPP25	12.3823	19.0345	16.7246	21.7029	0.620106	9.63437e-27	0.433737	6.57127e-08	0.809415	1.54317e-30	0.375688	0.00165125	1.17338	0.442814	1.01104	0.973755	1.12843	0.685756
ENSG00000178896	EXOSC4	6.61876	14.1156	13.7098	13.7171	1.09133	2.0916e-89	1.05013	4.2684e-47	1.04995	1.02835e-55	-0.000183674	1	0.916142	0.674433	1.03273	0.923036	1.30081	0.37742
ENSG00000178952	TUFM	135.222	137.52	134.759	138.983	0.0241776	0.513764	-0.00494219	1	0.0394554	0.413675	0.0443978	0.83151	0.956335	0.830439	0.932055	0.832783	0.790573	0.429631
ENSG00000178982	EIF3K	103.951	121.085	114.455	119.946	0.220009	3.62988e-08	0.138926	0.0181349	0.206376	5.40149e-05	0.0674503	0.740561	0.781123	0.236731	1.31496	0.409943	0.553179	0.0452277
ENSG00000179041	RRS1	29.3847	16.7579	17.4666	16.7301	-0.810611	2.03901e-54	-0.750354	1.06453e-22	-0.813111	3.87068e-32	-0.0627572	0.898067	1.14256	0.522801	1.02972	0.93009	1.16925	0.599677
ENSG00000179115	FARSA	37.1282	44.8168	43.5737	44.3754	0.271377	2.33439e-16	0.231015	8.32833e-07	0.257166	1.04466e-09	0.0261507	1	1.144	0.518894	1.45256	0.262918	1.56754	0.129258
ENSG00000179134	SAMD4B	53.1793	88.7349	99.6407	81.3624	0.738536	2.87408e-101	0.905643	6.79865e-89	0.613529	5.4445e-48	-0.292117	8.96264e-06	0.992619	0.971658	1.408	0.303045	0.656417	0.155834
ENSG00000179151	EDC3	19.6263	20.6905	21.2952	19.7672	0.0759878	0.00446529	0.117572	0.00156919	0.0100507	0.874542	-0.107524	0.0776728	0.857756	0.461806	0.813429	0.535499	0.728192	0.288354
ENSG00000179172	HNRNPCL1	0.0283469	0.00725638	0.00644305	0.00830812	-1.64987	3.86714e-20	-1.73897	1.16592e-10	-1.47806	4.52236e-10	0.284558	0.864422	1.16436	0.483492	1.31053	0.434362	0.891582	0.71235
ENSG00000179218	CALR	281.313	638.059	675.678	596.435	1.18151	3.40198e-138	1.26416	6.19784e-92	1.08418	5.70692e-79	-0.179978	0.139802	1.04643	0.827723	1.08665	0.803067	1.08452	0.785501
ENSG00000179299	NSUN7	16.3632	5.80669	4.78492	6.48387	-1.49436	3.69137e-114	-1.77364	2.62998e-71	-1.33509	4.74466e-54	0.438609	0.000599323	0.984677	0.941021	0.813974	0.536198	0.744135	0.319924
ENSG00000179300	ZCCHC5	0.125176	0.139439	0.126637	0.113394	0.149756	0.408442	0.0146279	1	-0.140403	0.623587	-0.155785	0.963037	0.784379	0.248502	NA	NA	NA	NA
ENSG00000179335	CLK3	32.169	40.2807	38.765	41.2416	0.3244	7.06148e-21	0.269044	4.03072e-08	0.358373	2.73938e-16	0.0893297	0.442083	0.640237	0.0337166	0.691328	0.26837	0.862391	0.62345
ENSG00000179409	GEMIN4	20.1546	16.9896	15.503	16.7132	-0.246746	1.3775e-12	-0.378204	3.70659e-15	-0.270493	4.68882e-10	0.107717	0.242803	0.637596	0.0309255	0.73536	0.355283	0.610535	0.0986433
ENSG00000179455	MKRN3	0.327934	0.188857	0.263791	0.153009	-0.785562	0.000680179	-0.308637	0.460278	-1.08439	0.000545033	-0.777974	0.175249	0.857292	0.461503	0.972567	0.933902	0.625855	0.117122
ENSG00000179598	PLD6	5.48619	2.71246	2.03882	2.23236	-1.01586	7.59507e-42	-1.42471	3.87665e-46	-1.29743	2.5949e-48	0.127339	0.646732	0.84326	0.413467	1.78777	0.078991	0.850684	0.587223
ENSG00000179912	R3HDM2	53.3797	30.9769	30.1542	30.105	-0.784985	3.64608e-170	-0.823642	5.94781e-91	-0.826271	7.8248e-113	-0.00262797	1	0.901329	0.618258	0.855348	0.639432	1.08173	0.792149
ENSG00000179950	PUF60	59.4588	98.6628	104.376	94.3217	0.730531	4.94981e-93	0.811828	1.59984e-63	0.66562	1.17037e-50	-0.146209	0.0993132	1.10926	0.618918	1.29796	0.435547	1.16495	0.608315
ENSG00000179988	PSTK	4.28894	2.10887	1.76104	2.01823	-1.02669	1.09313e-104	-1.28114	1.87979e-87	-1.08925	2.91291e-80	0.191975	0.0561887	0.774987	0.222021	1.01971	0.953301	1.29522	0.385327
ENSG00000180098	TRNAU1AP	13.3943	11.3226	12.59	10.6536	-0.243635	2.82262e-10	-0.0905103	0.131586	-0.33182	1.52393e-11	-0.241321	0.00162569	1.16485	0.463968	0.76462	0.42007	0.765999	0.372813
ENSG00000180113	TDRD6	3.06683	1.4732	1.37307	1.39829	-1.05442	1.21867e-34	-1.15633	1.73126e-19	-1.12914	5.08503e-23	0.027232	1	0.599125	0.0140941	0.587668	0.115655	0.713322	0.255975
ENSG00000180228	PRKRA	25.869	25.6707	27.7211	24.5767	-0.0113049	0.767806	0.0997157	0.00797599	-0.074255	0.0348086	-0.173975	0.000677735	1.17781	0.432458	0.979822	0.951237	0.870162	0.64069
ENSG00000180574	EIF2S3L	0.762687	0.2572	0.325954	0.233975	-1.55822	4.76533e-24	-1.2206	1.13565e-07	-1.69069	6.06628e-16	-0.470919	0.253533	1.80046	0.00456083	NA	NA	NA	NA
ENSG00000180917	CMTR2	18.255	19.3701	19.2814	19.833	0.0861631	0.0185992	0.0793132	0.14755	0.120216	0.00994597	0.0409036	0.909329	1.32528	0.177963	1.32027	0.403771	1.0763	0.805576
ENSG00000180992	MRPL14	11.1416	29.6764	28.3198	31.204	1.4127	3.83343e-193	1.34564	1.95521e-102	1.48514	6.37893e-148	0.139501	0.343516	1.33786	0.162152	1.1618	0.652471	1.27744	0.416038
ENSG00000181026	AEN	37.74	23.9389	21.4876	24.0258	-0.656786	1.94806e-36	-0.812471	8.72622e-27	-0.651447	5.3856e-22	0.16103	0.268498	0.750526	0.168172	1.00848	0.979917	0.652793	0.152015
ENSG00000181163	NPM1	524.035	282.778	294.525	273.961	-0.890003	5.50533e-80	-0.831275	2.53686e-33	-0.935715	6.76382e-51	-0.10444	0.54229	1.58396	0.0290929	2.12168	0.0242947	0.7131	0.254593
ENSG00000181222	POLR2A	162.199	125.326	122.184	122.819	-0.371997	2.03283e-27	-0.408679	1.48646e-16	-0.401164	2.01214e-19	0.00751524	1	0.901528	0.619005	0.603243	0.130773	0.987816	0.967209
ENSG00000181381	DDX60L	13.6325	29.1143	32.3415	29.8664	1.09438	2.15694e-89	1.24585	4.66096e-71	1.13122	1.11365e-68	-0.114644	0.584105	2.03478	0.000730013	2.80449	0.00230602	1.3641	0.301657
ENSG00000181588	MEX3D	7.92271	16.8137	19.3065	15.9772	1.08451	1.51468e-111	1.28381	2.53545e-94	1.01098	5.89751e-68	-0.272851	0.00741115	1.09275	0.670746	0.712026	0.312732	1.02382	0.937078
ENSG00000181610	MRPS23	20.0388	24.2061	24.575	22.4895	0.272382	4.40335e-12	0.294672	6.15187e-08	0.16608	0.00110892	-0.128596	0.227273	0.844963	0.419027	1.49062	0.234562	0.524456	0.0279791
ENSG00000181817	LSM10	11.8192	16.986	16.3642	16.6351	0.523019	1.45589e-46	0.469682	8.18386e-21	0.492732	2.59356e-27	0.0230491	1	0.53101	0.00236944	0.596972	0.122834	0.80432	0.46527
ENSG00000181991	MRPS11	14.9726	14.5224	13.9561	14.2958	-0.0444127	0.230499	-0.101452	0.0448935	-0.0674208	0.155909	0.034033	0.947422	0.828069	0.365894	1.08218	0.812654	0.696215	0.227706
ENSG00000182004	SNRPE	23.5473	30.1332	30.0264	30.4438	0.355147	5.09897e-16	0.350493	1.34369e-08	0.36998	3.13818e-11	0.019487	1	1.46865	0.0652355	1.80392	0.0766344	1.23884	0.474432
ENSG00000182117	NOP10	18.5965	44.814	45.9801	47.1351	1.2686	1.45452e-189	1.30577	1.46993e-120	1.34139	3.48037e-150	0.0356157	1	1.64917	0.0159542	1.50309	0.219017	1.4863	0.186297
ENSG00000182134	TDRKH	5.5036	7.08428	6.89234	6.95022	0.363303	1.3803e-16	0.323694	1.67055e-07	0.336545	1.78554e-09	0.0128489	1	0.777018	0.225508	1.31765	0.409352	0.65639	0.157445
ENSG00000182154	MRPL41	27.1754	27.3035	23.7454	27.16	0.00640276	0.99533	-0.194716	0.0511313	-0.00101842	1	0.193703	0.302688	0.756032	0.178524	0.632094	0.171052	1.1698	0.602959
ENSG00000182173	TSEN54	34.8077	25.9738	22.9446	26.9436	-0.422687	4.59451e-21	-0.601346	1.09546e-20	-0.369726	1.54238e-10	0.231627	0.0162944	0.641019	0.0325522	0.784068	0.465116	0.527295	0.0324097
ENSG00000182180	MRPS16	34.9433	44.1497	42.9199	43.4182	0.337033	1.15715e-25	0.296714	4.45821e-11	0.313023	1.44259e-14	0.0163088	1	1.52738	0.043107	1.18885	0.605582	1.34296	0.323894
ENSG00000182196	ARL6IP4	90.6828	1.80953	1.62982	1.87516	-5.65053	0	-5.79926	0	-5.60005	0	0.199336	0.150118	0.664792	0.0506026	0.685509	0.261189	0.904341	0.735882
ENSG00000182545	RNASE10	0.011886	0.0359483	0.0417652	0.0324153	1.42996	3.93783e-17	1.61285	1.19001e-13	1.2908	5.79332e-10	-0.331115	0.562339	1.57675	0.0282053	1.83359	0.0686102	1.4492	0.211745
ENSG00000182774	RPS17	0.635712	491.284	492.664	479.023	9.59474	0	9.59828	0	9.55788	0	-0.0405458	1	1.24057	0.302107	1.35452	0.361546	0.913721	0.762142
ENSG00000182810	DDX28	6.0904	8.18996	8.18647	7.97542	0.425838	3.5793e-22	0.426035	3.85576e-12	0.387405	4.20427e-12	-0.0386365	1	0.709863	0.099919	1.01707	0.959572	0.580085	0.0644904
ENSG00000182872	RBM10	58.301	47.4147	44.5291	45.2465	-0.29852	6.09727e-19	-0.388989	4.2e-17	-0.366047	1.46504e-18	0.0229427	1	0.504807	0.00117222	0.953632	0.886728	0.550422	0.0487407
ENSG00000182899	RPL35A	498.114	331.429	335.063	316.554	-0.587829	1.582e-34	-0.572033	2.90509e-16	-0.654092	2.99347e-25	-0.0820591	0.729192	1.47058	0.0643136	1.37774	0.337322	1.34697	0.318991
ENSG00000182934	SRPRA	436.818	142.986	145.556	134.814	-1.61117	0	-1.58544	9.37267e-149	-1.69604	3.77968e-209	-0.110596	0.353199	1.4712	0.0665503	1.76739	0.091334	0.782726	0.410214
ENSG00000182944	EWSR1	162.976	147.326	146.932	144.47	-0.145599	4.37821e-08	-0.149447	0.000113681	-0.173826	4.91294e-07	-0.0243792	0.986895	0.838195	0.397675	0.95193	0.883217	0.734995	0.300914
ENSG00000182973	CNOT10	15.5892	17.1038	17.2551	16.796	0.133517	7.87702e-07	0.146432	0.000145169	0.107725	0.00239994	-0.0387084	0.825579	0.952307	0.814686	0.8749	0.688702	0.859575	0.61153
ENSG00000183011	NAA38	15.0912	24.741	20.779	22.9318	0.712739	2.63987e-45	0.461462	1.09766e-12	0.602998	3.24124e-25	0.141538	0.307181	0.590683	0.0122526	0.691812	0.273062	0.670106	0.181797
ENSG00000183207	RUVBL2	35.2462	55.5388	57.334	52.4261	0.655774	1.16686e-58	0.701824	5.91322e-37	0.572601	2.06409e-29	-0.129225	0.269601	1.20002	0.384035	2.12856	0.0236613	0.878986	0.665142
ENSG00000183258	DDX41	40.5868	50.6093	53.1556	48.9548	0.318153	1.59208e-33	0.389049	1.28748e-26	0.270154	7.57349e-16	-0.118898	0.0547361	0.883372	0.551868	1.17445	0.629153	1.04399	0.885445
ENSG00000183431	SF3A3	43.4779	49.8398	50.3192	46.7925	0.196921	6.17212e-11	0.210744	3.97269e-07	0.105914	0.00695781	-0.104832	0.172577	0.877518	0.531496	0.795369	0.49392	0.773233	0.387172
ENSG00000183496	MEX3B	1.28912	2.75554	3.12173	2.5681	1.09151	2.45806e-52	1.27044	3.38115e-41	0.989935	3.06471e-29	-0.280609	0.116238	0.960756	0.84805	0.639964	0.188036	0.811952	0.484053
ENSG00000183520	UTP11L	20.6563	18.572	18.4713	17.8252	-0.153362	8.18345e-06	-0.161013	0.00117395	-0.212703	1.323e-06	-0.0516905	0.79772	1.17348	0.442591	NA	NA	NA	NA
ENSG00000183570	PCBP3	3.14194	4.12665	3.73356	3.28126	0.392764	2.37838e-06	0.248063	0.0329293	0.0617348	0.638495	-0.186364	0.49592	0.500199	0.000888509	0.747219	0.383288	0.665377	0.171495
ENSG00000183617	MRPL54	22.0349	22.0396	18.1164	22.0445	-0.000432154	1	-0.282563	8.16515e-05	-0.00035424	1	0.282219	0.00602275	0.781596	0.237108	0.609484	0.143433	1.15609	0.627078
ENSG00000183665	TRMT12	6.13806	9.39749	10.3419	8.67503	0.61503	1.55983e-55	0.753496	7.70151e-47	0.49944	1.24168e-24	-0.254078	0.0014361	1.17397	0.444002	1.02669	0.937109	0.818188	0.500307
ENSG00000183684	ALYREF	15.2935	35.8209	37.7609	33.1478	1.2275	2.35345e-166	1.30374	4.10595e-110	1.11562	5.60792e-94	-0.18812	0.0833768	0.956439	0.830848	1.37637	0.338839	0.685611	0.203841
ENSG00000183751	TBL3	37.9029	37.0189	36.9569	37.3261	-0.0343076	0.472329	-0.0364816	0.651718	-0.0223532	0.789193	0.0141287	1	1.17655	0.436022	2.0703	0.0277821	0.820905	0.507437
ENSG00000183808	RBM12B	10.3462	10.7133	10.9546	10.6631	0.0510439	0.325238	0.0827494	0.265508	0.0443823	0.55956	-0.0383697	1	1.25205	0.281847	0.785838	0.469284	1.08067	0.795095
ENSG00000184083	FAM120C	8.26469	7.66075	6.94943	6.40631	-0.108893	0.0327316	-0.248829	4.75933e-05	-0.366536	1.83846e-11	-0.117715	0.353943	0.606357	0.0169659	0.841796	0.610013	0.6346	0.126274
ENSG00000184110	EIF3C	11.7687	4.49879	4.78969	4.35171	-1.38622	9.9651e-153	-1.29645	1.10132e-61	-1.43351	1.03939e-91	-0.137069	0.397275	1.19239	0.400936	1.14049	0.694899	0.913219	0.760736
ENSG00000184209	SNRNP35	11.4177	14.9059	13.3815	15.0732	0.38337	3.35907e-26	0.228301	5.82653e-06	0.399107	2.19092e-19	0.170812	0.0336466	0.696187	0.0825808	0.558219	0.0883667	1.01356	0.963983
ENSG00000184220	CMSS1	15.3828	10.7724	12.1188	9.38882	-0.514428	8.83748e-28	-0.344068	2.71393e-07	-0.713009	4.55559e-32	-0.36896	2.94509e-05	1.32474	0.179738	1.89089	0.0580893	1.42818	0.243908
ENSG00000184388	PABPC1L2B	0.0127308	0.0193127	0.00200072	0.00774142	0.567668	0.0909136	-1.69784	8.62181e-05	-0.446038	0.299151	1.38975	0.0278977	0.54836	0.0415751	0.906465	0.853034	0.743345	0.49725
ENSG00000184571	PIWIL3	0.00629041	0.019006	0.00445036	0.0289806	1.32142	1.30169e-05	-0.412826	0.580292	1.88222	2.75074e-08	2.41635	0.000222085	0.728558	0.174802	1.46115	0.341285	0.692106	0.241861
ENSG00000184575	XPOT	87.2907	53.1123	54.9648	49.2489	-0.716595	9.44628e-55	-0.667068	1.53626e-23	-0.825541	1.4055e-42	-0.158474	0.184482	1.163	0.470211	1.25765	0.493358	0.998945	0.997181
ENSG00000184672	RALYL	0.912917	1.50288	0.73694	1.41567	0.717709	2.52051e-07	-0.308351	0.155393	0.631129	0.000145525	0.940057	0.000496755	0.763056	0.193727	0.966512	0.918607	0.607804	0.0935677
ENSG00000184708	EIF4ENIF1	17.7079	20.1042	19.0329	20.0009	0.183312	6.40095e-15	0.104216	0.00176817	0.17629	1.46075e-09	0.0720761	0.266603	0.900285	0.614341	0.862577	0.657118	0.848308	0.58151
ENSG00000184735	DDX53	0.0054778	0.063509	0.0569906	0.00097804	3.08846	7.85022e-11	2.90307	3.50094e-09	-1.18616	0.0177427	-4.35241	5.00111e-08	0.674953	0.259577	2.11399	0.0866713	0.409367	0.122423
ENSG00000184863	RBM33	95.1009	39.4698	39.0484	40.255	-1.26842	2.78679583247321e-315	-1.28398	6.26995e-146	-1.23989	2.73315e-170	0.0440932	0.857006	0.840944	0.405621	0.806085	0.517663	0.942281	0.84196
ENSG00000184898	RBM43	7.0365	9.76116	10.7639	9.36299	0.472096	4.97497e-22	0.612811	2.70141e-20	0.412046	2.30266e-11	-0.200781	0.0889853	1.60861	0.0234364	1.03008	0.929581	1.05448	0.859629
ENSG00000184924	PTRHD1	5.81238	10.212	9.0665	10.6884	0.811708	1.48181e-76	0.641455	4.49695e-27	0.877508	1.22992e-60	0.236062	0.0135011	0.968327	0.877437	0.854678	0.63775	1.04975	0.8709
ENSG00000184967	NOC4L	15.9602	15.6426	14.8408	15.79	-0.0297412	0.628114	-0.105178	0.170743	-0.0162497	0.922903	0.0889318	0.678793	0.631033	0.0276936	0.917859	0.797322	0.750189	0.339267
ENSG00000185085	INTS5	19.1089	22.4091	22.6726	22.0322	0.229268	6.131e-12	0.246361	1.63772e-07	0.204851	1.83236e-06	-0.0415116	0.890012	0.910917	0.654497	0.791867	0.483558	0.671663	0.181735
ENSG00000185088	RPS27L	76.5259	57.9666	51.6502	65.2097	-0.400823	2.21235e-17	-0.567145	3.91744e-17	-0.231003	0.000161745	0.336146	0.000253877	1.35631	0.142676	0.856236	0.643213	1.66418	0.0848828
ENSG00000185129	PURA	10.1989	28.561	26.3732	28.8057	1.4861	0	1.37101	8.81276e-167	1.49838	2.47328e-236	0.127373	0.232427	0.991669	0.968005	0.683304	0.257094	1.20925	0.523412
ENSG00000185163	DDX51	37.9208	16.9506	15.5663	16.3437	-1.16198	5.56204e-170	-1.2846	2.77656e-100	-1.21474	1.63869e-112	0.0698679	0.718709	0.671303	0.0558022	0.712199	0.309272	0.780874	0.406609
ENSG00000185246	PRPF39	50.4597	18.8193	18.1685	19.2686	-1.42258	0	-1.4736	2.25605e-168	-1.38855	1.20516e-188	0.0850608	0.474702	0.580643	0.00964469	0.70329	0.295298	0.662433	0.166816
ENSG00000185272	RBM11	0.888481	0.657117	0.489317	0.574729	-0.434009	3.45249e-06	-0.856989	2.94243e-11	-0.627418	4.95965e-08	0.229908	0.409684	0.625996	0.0242226	0.656019	0.214153	0.828551	0.527645
ENSG00000185414	MRPL30	0.0247495	16.9498	17.2268	16.8716	9.29874	0	9.30997	0	9.28268	0	-0.0306449	0.973842	1.21073	0.358825	0.892805	0.733597	1.10216	0.744184
ENSG00000185418	TARSL2	16.2634	10.4025	9.1359	11.0424	-0.644437	1.71226e-52	-0.831798	4.53968e-42	-0.558512	7.84461e-25	0.273307	0.00125931	0.673594	0.0579574	0.729385	0.344809	0.672373	0.181171
ENSG00000185608	MRPL40	19.7099	18.752	18.6357	17.5735	-0.0725679	0.08735	-0.0809124	0.197169	-0.166465	0.00134568	-0.0855555	0.557299	0.936696	0.753816	1.74938	0.0937444	1.09116	0.770243
ENSG00000185650	ZFP36L1	423.493	287.026	345.163	272.906	-0.561146	6.24003e-20	-0.295054	0.000815355	-0.633928	4.95404e-16	-0.338874	0.00621058	1.59267	0.0246124	1.34721	0.370239	0.839042	0.556486
ENSG00000185721	DRG1	32.8075	30.3158	30.2101	29.0774	-0.114385	0.00489443	-0.119097	0.0475417	-0.174548	0.000796799	-0.0554514	0.829842	1.58896	0.0279881	1.62307	0.147987	1.30294	0.383112
ENSG00000185728	YTHDF3	39.8521	47.3227	48.4345	46.0508	0.248113	1.74299e-13	0.28152	2.6112e-09	0.208813	1.54126e-06	-0.072709	0.577228	1.11228	0.611012	1.27687	0.462996	0.623237	0.110228
ENSG00000185736	ADARB2	3.58977	1.75707	1.06961	1.46034	-1.03052	3.58145e-14	-1.74545	3.64205e-18	-1.29907	1.1056e-13	0.446653	0.185073	0.76402	0.196358	0.82825	0.571881	0.665339	0.171435
ENSG00000185745	IFIT1	5.88975	28.4897	30.7669	30.508	2.27384	1.51432e-117	2.38472	1.55206e-85	2.37255	1.3615e-96	-0.0121836	1	1.10534	0.630937	1.39123	0.320448	0.934848	0.821234
ENSG00000185946	RNPC3	46.7951	8.16347	7.92183	8.5873	-2.51841	0	-2.56184	7.6859e-203	-2.44538	1.12699e-236	0.116475	0.530757	0.892072	0.585102	0.96073	0.904477	1.03612	0.905281
ENSG00000186288	PABPC1L2A	0.0115445	0.0162341	0.00322384	0.00660414	0.455245	0.171676	-1.25225	0.00421497	-0.478415	0.253096	0.854285	0.368217	0.552762	0.0382224	0.757821	0.563767	0.521086	0.13031
ENSG00000186416	NKRF	8.18387	8.21471	8.24318	8.08131	0.00446654	0.953651	0.00992522	0.940719	-0.0191826	0.754117	-0.0291101	0.978978	1.08552	0.69447	1.23457	0.527154	0.791579	0.433053
ENSG00000186468	RPS23	337.517	371.788	358.249	365.64	0.139498	0.000704228	0.0860297	0.174892	0.115423	0.0340854	0.0293933	1	0.830286	0.374568	0.79901	0.502616	1.03921	0.897589
ENSG00000186566	GPATCH8	26.8342	41.4228	41.6798	40.8444	0.626565	4.67782e-80	0.635244	1.73203e-44	0.606348	2.01203e-48	-0.0288984	1	1.09319	0.66913	0.994154	0.985967	1.1784	0.581576
ENSG00000186666	BCDIN3D	2.7446	3.61095	3.19891	3.60905	0.394325	1.67719e-20	0.221431	0.000204753	0.393182	3.90464e-14	0.171775	0.0824648	0.693853	0.0790973	0.963684	0.911632	0.648656	0.14591
ENSG00000186834	HEXIM1	37.7347	42.6	47.3436	41.8832	0.175065	3.6065e-06	0.327314	6.77088e-11	0.150568	0.00152878	-0.176749	0.028618	1.20184	0.378265	1.03335	0.921726	1.13082	0.681745
ENSG00000187024	PTRH1	0.104713	0.132477	0.130416	0.120089	0.33512	0.000721094	0.309494	0.0283784	0.203145	0.142115	-0.106979	0.893848	0.872892	0.514203	0.589453	0.113703	0.841522	0.563158
ENSG00000187051	RPS19BP1	48.6585	41.3047	38.8584	41.5195	-0.236815	1.83918e-07	-0.324567	7.2101e-07	-0.229275	0.000114924	0.0952945	0.585413	0.968373	0.877617	0.703695	0.290043	1.03721	0.903077
ENSG00000187191	DAZ3	0	0.000338761	0.000222857	0.00023824	0.195992	0.192085	0.127213	0.535485	0.193451	0.624132	0.0804014	1	0.520364	0.508434	NA	NA	NA	NA
ENSG00000187556	NANOS3	0.159148	0.67087	0.510964	0.490494	2.05265	4.71631e-73	1.67653	9.71224e-34	1.6136	2.43226e-36	-0.0634031	1	0.608311	0.0166562	0.556991	0.0767685	0.721299	0.272109
ENSG00000187742	SECISBP2	89.7303	33.126	30.6453	32.4919	-1.43755	0	-1.54986	1.58793e-264	-1.46524	1.17523e-298	0.084626	0.325974	0.751529	0.170174	0.642076	0.182944	0.949433	0.861849
ENSG00000187772	LIN28B	0.00922801	0.0314894	0.0164884	0.00909498	1.60427	1.03975e-05	0.770355	0.101447	0.0448147	1	-0.760182	0.550021	0.922584	0.737813	2.38387	0.00874986	0.576203	0.174657
ENSG00000187959	CPSF4L	0.191542	0.100095	0.0769514	0.115163	-0.93739	9.94003e-21	-1.28651	6.35937e-18	-0.734825	1.65444e-08	0.555759	0.0102409	0.901011	0.616981	0.885057	0.713965	0.697049	0.229263
ENSG00000187969	ZCCHC13	0.00271505	0.000729199	0.00108943	0.00032933	-0.768111	0.00657694	-0.568974	0.273356	-0.942283	0.0107454	-0.454409	0.695317	1.69161	0.364996	NA	NA	NA	NA
ENSG00000188120	DAZ1	0.000378021	0.0186624	0.00233408	0.0131062	2.98232	2.17792e-11	0.783962	0.0245982	2.49016	2.42211e-08	1.82255	0.205886	1.006	0.987103	0	0.312643	1.28286	0.569022
ENSG00000188177	ZC3H6	15.179	9.65411	9.44148	8.9595	-0.651828	2.11323e-45	-0.683836	3.7838e-25	-0.759286	2.67717e-37	-0.0754511	0.745433	0.81073	0.313516	1.43159	0.282177	0.744423	0.321523
ENSG00000188425	NANOS2	0.00825413	0.00464776	0.00273458	0.00341064	-0.689569	0.0228497	-1.0171	0.0123477	-0.894461	0.0152279	0.145034	1	0.910268	0.738952	1.39145	0.531482	1.12469	0.774985
ENSG00000188529	SRSF10	14.5265	56.7399	57.2162	57.081	1.96637	0	1.97825	0	1.97504	0	-0.00321334	1	1.21887	0.342178	1.00845	0.979881	0.824795	0.517692
ENSG00000188573	FBLL1	0.711468	2.26193	0.760997	0.972011	1.66399	9.67871e-26	0.0950878	0.726016	0.446045	0.0111381	0.351191	0.430902	0.599651	0.0146203	0.977573	0.945748	0.55435	0.0515708
ENSG00000188613	NANOS1	8.40818	2.26348	1.72086	1.34293	-1.89178	4.34793e-78	-2.28546	3.9382e-68	-2.64388	1.48341e-108	-0.358514	0.0559468	0.670743	0.0547622	0.690502	0.264575	0.731957	0.29633
ENSG00000188655	RNASE9	0.00227851	0.0014126	0.00298563	0.000455709	-0.270531	0.444404	0.237073	0.563856	-0.650059	0.0689609	-1.04505	0.0360268	1.27755	0.560872	1.40528	0.478075	0.597176	0.60624
ENSG00000188739	RBM34	0.29728	1.32427	1.27775	1.38862	2.13536	3.73563034820567e-320	2.08859	4.00429e-184	2.20488	1.2578e-242	0.11611	0.562339	1.27796	0.239318	0.785177	0.467725	0.991425	0.977008
ENSG00000188846	RPL14	728.528	387.863	372.604	385.903	-0.909483	3.22171e-84	-0.967339	1.76538e-44	-0.916789	9.54622e-50	0.0505505	0.933219	1.28037	0.236494	0.872499	0.682173	1.28355	0.404135
ENSG00000188917	TRMT2B	12.0703	13.4571	12.6861	14.0598	0.156985	1.96979e-07	0.0722697	0.11989	0.220502	5.48708e-09	0.148238	0.0249196	0.752048	0.170709	0.626237	0.159084	0.850144	0.585752
ENSG00000188976	NOC2L	60.72	57.5233	58.0466	55.845	-0.0781279	0.0422966	-0.0650738	0.284699	-0.120822	0.0146882	-0.0557486	0.798648	0.926124	0.712754	0.964737	0.914361	0.908877	0.74858
ENSG00000189007	ADAT2	19.7437	5.23383	5.10129	5.53284	-1.91556	5.11382e-256	-1.95186	1.79804e-116	-1.83564	4.64129e-131	0.116246	0.571311	0.771911	0.217052	0.730721	0.351431	0.61407	0.0993128
ENSG00000189091	SF3B3	80.773	102.109	105.799	100.469	0.338069	3.11317e-29	0.38929	1.52964e-20	0.314725	2.27378e-16	-0.074566	0.475669	1.26011	0.267468	0.795906	0.495199	0.943534	0.845449
ENSG00000189266	PNRC2	7.22541	41.2812	38.5712	43.3758	2.5133	0	2.41518	0	2.58467	0	0.169489	0.145256	1.13103	0.554592	0.670429	0.239065	0.880057	0.668735
ENSG00000189306	RRP7A	24.261	38.4137	40.6287	36.6812	0.662506	2.03627e-51	0.743477	1.47354e-35	0.596001	2.63459e-27	-0.147479	0.227841	0.969568	0.882279	0.833771	0.585549	0.903269	0.733393
ENSG00000189369	GSPT2	7.01329	13.2432	12.8939	13.9532	0.916476	1.3872e-48	0.878035	5.29319e-25	0.991539	9.20874e-38	0.113503	0.714655	0.924976	0.708584	0.882394	0.70765	0.954916	0.877052
ENSG00000196116	TDRD7	13.0312	18.2981	16.6827	19.0894	0.49008	4.60829e-39	0.356641	7.80857e-12	0.551239	1.52063e-32	0.194603	0.019042	0.85449	0.450401	1.0945	0.786732	0.895621	0.711499
ENSG00000196141	SPATS2L	52.2835	158.529	180.61	157.187	1.60018	2.73385e-270	1.78828	6.83903e-224	1.58791	3.72237e-203	-0.200367	0.0512159	1.64864	0.0163041	0.949706	0.876958	1.43222	0.228645
ENSG00000196235	SUPT5H	126.607	129.366	136.496	121.351	0.0310788	0.451759	0.108428	0.0392486	-0.0611267	0.233856	-0.169555	0.0301719	0.770221	0.211957	0.885345	0.715115	1.04606	0.880191
ENSG00000196305	IARS	107.811	66.9945	68.0917	60.7719	-0.686227	4.86988e-45	-0.662803	2.93701e-21	-0.826792	6.15769e-39	-0.16399	0.193696	1.10727	0.627879	1.01641	0.961302	0.968584	0.91526
ENSG00000196361	ELAVL3	0.228234	0.685151	0.163324	0.176958	1.5819	3.8921e-18	-0.463743	0.0470348	-0.340347	0.104614	0.123994	1	0.740858	0.151192	0.936461	0.843845	0.550942	0.046789
ENSG00000196363	WDR5	47.1884	32.2861	32.0697	29.1075	-0.54774	5.56137e-56	-0.55737	6.62606e-32	-0.697131	2.60638e-59	-0.139762	0.0694187	0.697988	0.0836355	0.73391	0.352178	0.683556	0.20202
ENSG00000196365	LONP1	58.5148	60.6544	56.0642	57.1791	0.0517551	0.250744	-0.0616778	0.352245	-0.0333645	0.624132	0.0283137	1	0.81107	0.31483	1.04119	0.903613	1.08647	0.780875
ENSG00000196419	XRCC6	133.898	189.052	198.383	179.042	0.497571	1.21469e-57	0.567096	1.03587e-40	0.419104	8.15167e-27	-0.147992	0.0383669	1.22047	0.344178	1.02381	0.943816	1.1686	0.611989
ENSG00000196449	YRDC	12.1742	11.3959	10.8189	10.7092	-0.0952094	0.0447194	-0.169999	0.0096455	-0.184713	0.00154093	-0.014713	1	1.17926	0.431302	0.796728	0.495151	1.65835	0.0929411
ENSG00000196497	IPO4	68.7515	3.88783	3.8505	3.70069	-4.14714	0	-4.15786	0	-4.2193	0	-0.0614337	0.899807	0.850469	0.436794	1.15053	0.674225	0.776489	0.395018
ENSG00000196504	PRPF40A	54.5052	67.3991	71.1308	67.4853	0.306526	3.82215e-27	0.384143	3.28863e-23	0.308432	3.24219e-18	-0.0757116	0.395299	1.56465	0.0337492	1.88653	0.0590363	0.767477	0.374398
ENSG00000196664	TLR7	0.538344	3.4775	3.06312	3.60207	2.68262	3.72088e-98	2.49898	1.27967e-56	2.73285	3.16569e-77	0.233779	0.696973	1.00152	0.994194	1.02377	0.943903	0.703196	0.238078
ENSG00000196678	ERI2	11.0579	7.44815	7.16877	7.76898	-0.568583	4.41387e-45	-0.62371	3.18862e-26	-0.507348	5.74144e-22	0.116376	0.341253	1.33821	0.163376	0.997765	0.994644	1.07001	0.820809
ENSG00000196793	ZNF239	5.81654	2.97388	3.00653	3.10905	-0.968156	2.70707e-73	-0.951658	5.86828e-34	-0.903703	5.1234e-38	0.0479795	0.993591	0.96502	0.8652	0.708401	0.305445	0.647444	0.146578
ENSG00000196943	NOP9	23.1732	28.0464	27.6713	26.8827	0.275565	1.50815e-22	0.256063	4.49456e-11	0.214731	1.45156e-09	-0.0413334	0.810813	0.866776	0.492545	0.867026	0.668824	0.990389	0.974165
ENSG00000197102	DYNC1H1	167.887	301.778	317.714	284.687	0.845985	1.48239e-133	0.920201	8.06501e-89	0.761891	7.59019e-72	-0.158311	0.0500788	1.02853	0.892915	0.897041	0.744333	1.00066	0.998224
ENSG00000197111	PCBP2	431.882	182.208	179.95	175.536	-1.2451	8.27548415410601e-316	-1.26304	1.60206e-150	-1.29897	6.93511e-197	-0.0359311	0.919638	0.825	0.356507	1.39322	0.318339	0.807644	0.47292
ENSG00000197114	ZGPAT	22.5277	7.09705	7.29789	7.13189	-1.66668	1.5918795109005e-320	-1.62655	3.02208e-136	-1.65926	3.51041e-176	-0.032704	1	0.670929	0.0549331	0.615156	0.151227	1.01617	0.957116
ENSG00000197157	SND1	406.314	177.158	175.885	160.427	-1.1976	8.94852e-152	-1.20796	3.54704e-75	-1.34071	1.36638e-112	-0.132751	0.286252	0.991792	0.968502	2.97447	0.00120328	0.731513	0.29346
ENSG00000197181	PIWIL2	8.06959	2.64377	1.52836	3.48251	-1.61048	9.308e-48	-2.40019	2.52789e-45	-1.21192	7.18521e-18	1.18864	1.02e-09	1.26157	0.26689	0.54492	0.0660626	1.09843	0.754241
ENSG00000197223	C1D	8.7904	10.0982	10.2975	10.1024	0.199943	8.55777e-11	0.22829	1.32255e-07	0.199954	3.6738e-07	-0.0283386	0.990632	1.14132	0.52591	1.06193	0.856915	0.969424	0.917063
ENSG00000197345	MRPL21	18.132	19.7837	20.3829	19.2716	0.12524	0.00319381	0.168836	0.00531162	0.0873852	0.133122	-0.081454	0.645747	1.19138	0.401416	1.16425	0.648411	1.21549	0.513035
ENSG00000197381	ADARB1	17.9176	15.2919	16.1177	14.3049	-0.228201	4.00782e-06	-0.152348	0.0420271	-0.324635	4.12213e-07	-0.172293	0.173568	0.832355	0.385492	0.580987	0.113133	0.908887	0.750054
ENSG00000197451	HNRNPAB	50.4557	103.385	99.1193	109.115	1.03485	4.00853e-167	0.974064	1.33859e-83	1.11266	1.28686e-130	0.1386	0.16457	1.22704	0.32665	1.0464	0.892422	1.04132	0.892005
ENSG00000197498	RPF2	24.1028	17.8281	17.5454	17.7228	-0.43569	1.15414e-25	-0.458236	4.29814e-14	-0.444412	3.88471e-16	0.0138256	1	1.18689	0.410664	1.06104	0.859111	0.894671	0.708844
ENSG00000197728	RPS26	200.883	113.741	94.6133	118.562	-0.820643	1.98954e-19	-1.08619	1.48575e-15	-0.760768	2.50711e-10	0.325428	0.162198	1.03755	0.859667	1.28096	0.456433	1.2801	0.407377
ENSG00000197756	RPL37A	662.253	563.208	548.856	521.002	-0.233748	2.7718e-05	-0.27095	0.000753159	-0.346123	1.23578e-06	-0.0751728	0.836305	1.01361	0.948292	0.956769	0.894679	1.18923	0.561422
ENSG00000197958	RPL12	839.06	479.852	466.778	467.197	-0.806222	2.6942e-52	-0.84604	2.04529e-27	-0.844776	1.39999e-33	0.00126432	1	1.12577	0.571167	1.01584	0.962448	1.0765	0.805095
ENSG00000197976	AKAP17A	130.427	37.0348	34.5668	38.8066	-1.8162	0	-1.91565	1.19324e-176	-1.74882	7.70466e-189	0.166828	0.113705	0.497529	0.00113671	0.400904	0.0109969	0.763609	0.370094
ENSG00000198000	NOL8	30.7309	22.0865	22.4443	21.3226	-0.476228	3.06722e-67	-0.453251	2.61154e-30	-0.526797	3.99468e-49	-0.073547	0.394088	0.903475	0.626246	0.711277	0.305154	0.750393	0.333928
ENSG00000198015	MRPL42	14.8682	28.6016	27.4567	27.2302	0.943677	1.83175e-180	0.884807	3.71775e-94	0.872619	5.30605e-109	-0.0121913	1	0.616338	0.0195525	0.733517	0.353584	0.665759	0.169556
ENSG00000198034	RPS4X	1325.13	873.099	832.755	869.998	-0.601923	1.03546e-35	-0.67016	2.31044e-21	-0.607056	8.24078e-22	0.0631039	0.865939	1.04014	0.850313	0.976091	0.942212	1.2984	0.380812
ENSG00000198042	MAK16	13.1995	12.0354	12.4484	11.7347	-0.133178	0.00043113	-0.0845065	0.151252	-0.169862	0.000546402	-0.0853592	0.517459	1.00602	0.977034	0.859623	0.650177	1.2276	0.49351
ENSG00000198056	PRIM1	4.30288	3.70033	3.95208	3.28109	-0.217961	2.46464e-05	-0.123064	0.120282	-0.390786	2.33244e-09	-0.267764	0.0121101	0.799972	0.283588	1.11413	0.746034	0.757943	0.351168
ENSG00000198231	DDX42	164.661	91.7549	91.1342	90.0699	-0.843617	1.2075e-142	-0.853395	1.57657e-68	-0.870359	1.06956e-87	-0.0169641	1	0.7225	0.118202	1.01906	0.954905	0.691076	0.213629
ENSG00000198242	RPL23A	218.717	316.693	299.204	309.638	0.533961	1.39653e-31	0.452075	7.84096e-13	0.501457	1.43571e-18	0.0493818	0.939812	0.916342	0.675126	1.29388	0.439001	0.83941	0.556692
ENSG00000198265	HELZ	50.8935	32.7767	30.8277	31.9631	-0.634239	1.50702e-69	-0.722782	9.81493e-45	-0.670446	8.17015e-48	0.0523377	0.814571	0.831429	0.375287	0.699101	0.2833	0.99658	0.990851
ENSG00000198492	YTHDF2	43.9388	45.2417	45.8858	44.4278	0.0421259	0.137286	0.0625169	0.127742	0.0159441	0.750206	-0.0465735	0.710488	1.08067	0.709762	0.53719	0.0647494	1.16908	0.600742
ENSG00000198585	NUDT16	38.1339	40.3268	36.7226	41.4938	0.0806415	0.0631079	-0.0544646	0.454116	0.121875	0.0256215	0.176342	0.0654404	1.11384	0.605726	0.57826	0.109969	1.40715	0.259339
ENSG00000198692	EIF1AY	8.73571	6.43492	4.72002	6.96155	-0.440949	0.153591	-0.887752	0.0582726	-0.327573	0.494412	0.560246	0.650868	0.958211	0.838118	0.795526	0.494295	0.70354	0.241574
ENSG00000198700	IPO9	57.7907	49.7869	52.212	48.0512	-0.214783	1.41269e-18	-0.146226	3.47717e-05	-0.265834	2.19882e-17	-0.119609	0.0263589	1.1946	0.395977	0.896811	0.74375	0.75593	0.346535
ENSG00000198755	RPL10A	652.81	385.601	384.015	376.237	-0.759601	5.90564e-64	-0.765492	5.24657e-31	-0.795078	8.22431e-41	-0.0295862	1	1.2566	0.274112	1.14856	0.677989	1.04337	0.887459
ENSG00000198791	CNOT7	40.1454	44.6287	43.6817	40.8424	0.152799	9.6944e-06	0.121847	0.0104916	0.0249309	0.654417	-0.0969172	0.301578	0.936262	0.752978	1.27305	0.470597	1.17559	0.591563
ENSG00000198860	TSEN15	14.4147	19.5017	18.1296	21.2813	0.43631	7.57391e-26	0.331405	9.62747e-09	0.56245	3.27895e-28	0.231051	0.00941595	1.00153	0.994161	1.07966	0.818101	0.716574	0.26155
ENSG00000198874	TYW1	13.8263	13.9919	13.7203	13.4824	0.0177246	0.652109	-0.0103542	0.93141	-0.0352329	0.440198	-0.0248798	1	0.96644	0.870229	1.40244	0.31098	0.754741	0.344767
ENSG00000198900	TOP1	46.3439	78.8795	80.9331	77.3388	0.767221	1.22255e-91	0.804201	4.37191e-55	0.738816	2.83302e-55	-0.0653864	0.742778	1.72555	0.00909268	1.22221	0.546518	1.2964	0.388409
ENSG00000198917	C9orf114	21.8577	22.6296	22.6337	21.7799	0.0497588	0.128503	0.050311	0.313521	-0.00529719	1	-0.0556098	0.684806	0.583902	0.00943084	NA	NA	NA	NA
ENSG00000198918	RPL39	101.819	88.3361	85.5782	86.9011	-0.205113	0.000322232	-0.250677	0.0027032	-0.228708	0.00231071	0.0219689	1	1.17563	0.437372	1.25182	0.500204	1.05887	0.847878
ENSG00000198919	DZIP3	12.8914	17.8773	14.2733	15.5767	0.47169	5.9621e-14	0.146988	0.0907651	0.273017	0.000193519	0.126033	0.555706	0.688141	0.0724753	1.01344	0.9681	0.543411	0.0401506
ENSG00000198952	SMG5	75.9685	88.8997	88.2663	90.61	0.226605	1.39526e-12	0.216312	2.01883e-06	0.254159	4.73282e-10	0.0378473	0.908601	0.811691	0.31661	0.632598	0.168446	0.779485	0.402291
ENSG00000203791	METTL10	11.0674	7.27461	7.31651	7.14575	-0.604979	5.95556e-72	-0.595744	3.75704e-34	-0.631044	2.04169e-46	-0.0352988	0.951906	0.92052	0.691432	NA	NA	NA	NA
ENSG00000203867	RBM20	83.1731	0.745643	0.598552	0.794567	-6.7993	0	-7.11229	1.0066e-141	-6.7092	4.18209e-168	0.403591	0.276506	0.694402	0.0804036	1.2329	0.529821	0.581285	0.0688163
ENSG00000204010	IFIT1B	0.0129135	0.0121003	0.013923	0.0122694	-0.0156545	1	0.139341	0.79687	0.00973379	1	-0.134817	1	0.999771	0.999132	0.945037	0.866139	0.801885	0.463543
ENSG00000204316	MRPL38	40.9643	5.12541	4.84639	4.96649	-2.99908	0	-3.0794	5.57912e-250	-3.04414	1.91927151434785e-310	0.0352893	1	0.587284	0.0109767	1.02344	0.944679	0.448976	0.00748216
ENSG00000204352	C9orf129	0.0253529	0.00991958	0.00617144	0.0112566	-1.12632	9.86491e-12	-1.63461	6.535e-10	-0.994537	5.38615e-06	0.68328	0.164067	0.862222	0.477652	1.19476	0.622399	0.749085	0.330979
ENSG00000204764	RANBP17	7.01111	3.71487	3.57519	3.75459	-0.915351	2.23701e-32	-0.970896	3.56145e-17	-0.899934	2.03202e-18	0.0709853	0.990104	0.883279	0.552282	0.774342	0.444537	1.09354	0.764227
ENSG00000204822	MRPL53	1.07382	1.86234	1.74442	1.84337	0.788077	8.94943e-57	0.694947	1.076e-24	0.772166	2.44249e-36	0.0772116	0.786387	0.481222	0.000496824	0.498238	0.0375958	0.681416	0.198283
ENSG00000204842	ATXN2	32.3916	28.5081	28.1267	27.2237	-0.183974	1.04327e-07	-0.203592	3.80995e-05	-0.250472	1.33876e-08	-0.0468807	0.837052	0.794213	0.269131	0.916579	0.794092	0.92423	0.791557
ENSG00000205022	PABPN1L	0.204903	0.0208349	0.0176754	0.0199238	-3.16537	6.43687e-114	-3.35267	1.24138e-52	-3.26105	7.54794e-63	0.0980335	1	0.640096	0.0329852	0.705523	0.295908	0.518572	0.0296809
ENSG00000205323	SARNP	20.0504	1.66659	1.66892	1.68639	-3.59252	0	-3.58431	0	-3.58046	0	0.0039022	1	0.855128	0.455135	0.659757	0.215314	1.0442	0.885366
ENSG00000205339	IPO7	93.2264	98.6545	102.658	96.2026	0.0816733	0.0959964	0.139052	0.0441274	0.0453692	0.54591	-0.0936837	0.614857	1.75774	0.00746315	1.6514	0.133765	1.22841	0.492124
ENSG00000205571	SMN2	2.90201	1.90143	2.0416	1.79081	-0.609652	1.78643e-06	-0.506111	0.00905176	-0.696892	4.63314e-05	-0.190828	0.802268	1.01097	0.958322	1.04258	0.900439	0.96547	0.906193
ENSG00000205609	EIF3CL	0.589256	0.142843	0.130441	0.151403	-2.01848	2.86341e-142	-2.15505	2.17387e-65	-1.9173	3.23705e-69	0.239321	0.409656	1.16573	0.462069	1.49216	0.229668	0.885829	0.684176
ENSG00000205916	DAZ4	0	0.00180306	0.000193305	0.00250145	0.836495	0.000132964	0.112363	0.535485	1.02393	9.88081e-05	1.0889	0.307501	1.49566	0.427911	NA	NA	NA	NA
ENSG00000205937	RNPS1	43.1294	81.9422	82.6879	81.0459	0.925803	6.65792e-234	0.938942	1.81729e-132	0.909947	9.43704e-148	-0.0289966	0.964182	1.1624	0.470484	1.05634	0.869379	1.5362	0.14767
ENSG00000205944	DAZ2	0.000125143	0.00593567	0.00253304	0.00630341	1.75971	2.80288e-07	0.953032	0.00130338	1.77159	3.78546e-06	0.879244	0.789393	1.22678	0.627752	0	0.237096	1.6176	0.305968
ENSG00000205978	NYNRIN	17.4129	38.5071	40.8357	37.4232	1.14476	2.9452e-91	1.22933	3.14947e-60	1.10361	6.42549e-57	-0.125723	0.567733	0.811701	0.316181	0.775215	0.444433	0.759906	0.355709
ENSG00000206150	RNASE13	0.17421	0.107254	0.0730032	0.144812	-0.690755	1.20294e-06	-1.23334	7.01535e-09	-0.272272	0.186032	0.96731	0.000629074	0.885593	0.560237	0.574596	0.100691	0.761155	0.358612
ENSG00000206557	TRIM71	0.0395394	0.0492061	0.0428984	0.043127	0.330104	0.103396	0.129486	0.786192	0.165603	0.597163	0.0366833	1	0.712342	0.105108	0.519829	0.0549422	0.612528	0.0988863
ENSG00000211460	TSN	35.4634	55.3925	54.9097	55.4632	0.643512	1.57301e-145	0.63085	4.59288e-75	0.645373	3.56913e-94	0.0145217	1	1.00242	0.990742	0.686944	0.257892	0.760211	0.356417
ENSG00000212643	ZRSR1	1.04853	0.0512252	0.0472279	0.0489963	-4.25919	0	-4.34423	1.27899e-248	-4.3257	2.9562607791896e-312	0.0202952	1	1.15856	0.480829	1.19083	0.599842	1.16862	0.603111
ENSG00000213079	SCAF8	36.8648	22.769	21.5131	22.7021	-0.694417	7.16112e-100	-0.776653	2.53751e-60	-0.698492	5.40066e-61	0.078165	0.487066	1.12218	0.580251	0.98438	0.962387	1.07573	0.80657
ENSG00000213246	SUPT4H1	21.628	37.1629	36.9679	35.7702	0.780605	4.09286e-163	0.773322	1.11083e-89	0.725373	5.45382e-94	-0.0479518	0.757651	0.750262	0.167648	1.1373	0.699318	0.655976	0.155165
ENSG00000213339	QTRT1	101.091	26.3313	22.7015	25.7699	-1.94119	7.68828e-278	-2.15485	4.43794e-156	-1.97232	2.05487e-168	0.182539	0.157684	0.632721	0.0286261	0.83795	0.597643	0.713707	0.258639
ENSG00000213516	RBMXL1	13.3873	13.3748	13.4407	13.964	-0.000230036	1	0.00653684	1	0.0620514	0.334626	0.0555169	0.872582	1.1979	0.386866	0.810429	0.530119	1.14543	0.650595
ENSG00000213523	SRA1	19.0822	26.9501	26.2875	27.0478	0.497948	3.11371e-47	0.462391	4.72536e-22	0.502932	4.32128e-31	0.0405407	0.911316	0.605706	0.0163323	0.900972	0.755766	0.692142	0.215566
ENSG00000213638	ADAT3	3.25749	2.43067	1.86138	2.83315	-0.424111	1.00146e-06	-0.807775	1.2881e-10	-0.20251	0.0894597	0.605443	0.00033931	0.808509	0.308126	0.734595	0.359673	0.865601	0.62878
ENSG00000213741	RPS29	270.397	227.85	219.11	228.832	-0.24705	2.99736e-06	-0.303414	8.47235e-05	-0.240862	0.000558322	0.0625529	0.902493	1.31417	0.189677	1.17957	0.619891	1.01237	0.967168
ENSG00000213782	DDX47	0.102593	1.85708	2.18712	1.78714	4.16133	0	4.39393	0	4.10424	0	-0.290614	0.161568	1.12901	0.560476	0.657992	0.21233	1.03396	0.910819
ENSG00000214022	REPIN1	104.313	67.354	54.2474	68.1362	-0.631097	1.20234e-54	-0.943189	8.04281e-68	-0.614354	8.39675e-38	0.328839	2.28531e-06	0.587739	0.0114352	0.579859	0.106565	0.568722	0.0581185
ENSG00000214026	MRPL23	38.4603	22.4747	19.8753	24.1917	-0.775609	1.7295e-45	-0.95231	4.02303e-32	-0.669433	7.49646e-21	0.282887	0.0169137	0.982936	0.934231	1.14207	0.690025	0.938458	0.831634
ENSG00000214274	ANG	6.61678	17.6386	10.2001	21.8107	1.41448	2.68549e-74	0.624592	3.67328e-10	1.72087	4.82143e-90	1.09632	4.0851e-16	1.07302	0.73536	0.757129	0.409005	1.63759	0.0947752
ENSG00000214575	CPEB1	1.23941	1.95605	1.5632	1.56388	0.660097	2.2538e-13	0.338187	0.00587383	0.337343	0.00224231	-0.000860034	1	0.679493	0.0632205	0.794705	0.492339	0.653714	0.150949
ENSG00000214753	HNRNPUL2	121.097	56.2782	58.4439	56.2025	-1.10557	0	-1.05096	4.10699e-150	-1.1075	6.89622e-205	-0.0565421	0.596378	1.10511	0.631662	1.22341	0.54517	0.601834	0.08586
ENSG00000214944	ARHGEF28	56.7421	31.5557	31.7252	29.5409	-0.846464	2.02416e-51	-0.838736	2.31373e-24	-0.941594	7.19722e-37	-0.102859	0.680115	0.927154	0.717315	1.22121	0.55064	0.733278	0.29627
ENSG00000215251	FASTKD5	8.09015	10.7105	9.76018	11.0161	0.404956	7.27738e-25	0.270686	1.01767e-06	0.445662	8.3881e-20	0.174984	0.0573079	0.966179	0.868964	1.03679	0.914216	0.777175	0.402337
ENSG00000215301	DDX3X	164.856	193.419	190.78	195.036	0.230587	2.41314e-08	0.210732	0.000396746	0.242597	5.01039e-06	0.0318652	1	1.37495	0.127396	1.17358	0.630739	1.41914	0.240872
ENSG00000218819	TDRD15	0.00437405	0.00861838	0.00615601	0.0103554	0.778331	0.00481026	0.359705	0.458361	0.982312	0.00235592	0.65748	0.558596	0.805812	0.376125	0.675546	0.324778	0.758969	0.457857
ENSG00000218823	PAPOLB	0.0313133	0.00791498	0.00782349	0.00630563	-1.65243	2.16599e-16	-1.65636	5.5055e-08	-1.85844	8.54686e-12	-0.207542	0.988165	0.54227	0.0109864	0.554458	0.120052	0.681426	0.281798
ENSG00000218891	ZNF579	16.2031	13.0908	12.2901	12.9796	-0.308392	1.82171e-07	-0.399005	3.52472e-06	-0.320635	3.59587e-05	0.078375	0.854314	0.730693	0.13117	0.808647	0.523871	0.903227	0.733276
ENSG00000219200	RNASEK	1.54962	4.70669	4.44285	4.66538	1.60332	4.56365e-288	1.52016	5.24947e-154	1.59028	4.00654e-199	0.0700898	0.779007	0.540378	0.00342388	0.511251	0.0488454	0.874004	0.651966
ENSG00000221983	UBA52	394.095	339.921	321.41	335.189	-0.213391	2.13e-06	-0.294114	5.41012e-06	-0.233618	6.42891e-05	0.0604959	0.845857	1.02897	0.891075	1.08503	0.806831	1.2387	0.474675
ENSG00000223496	EXOSC6	10.7943	21.4177	20.4659	20.9346	0.988519	2.44227e-140	0.923124	1.39212e-69	0.955629	7.99763e-89	0.0325016	1	0.663162	0.0486164	0.513567	0.0446605	0.95663	0.881797
ENSG00000224470	ATXN1L	41.3924	36.4301	37.3144	35.8582	-0.183895	7.42236e-07	-0.149493	0.00688105	-0.206648	2.09219e-05	-0.0571562	0.790959	0.946313	0.791307	0.592895	0.114955	0.841886	0.563368
ENSG00000225921	NOL7	4.12703	27.7088	26.8579	27.7626	2.74624	0	2.70156	0	2.74891	0	0.0473375	0.826718	1.17266	0.444574	0.974911	0.939613	1.35227	0.309719
ENSG00000226941	RBMY1J	6.10162e-05	3.86404e-05	0	8.14209e-05	-0.00368294	1	-0.050126	1	0.0485294	1	0.130114	1	0	0	NA	NA	NA	NA
ENSG00000227057	WDR46	34.0674	38.9539	39.4312	37.8265	0.19284	1.2935e-07	0.210789	4.82613e-05	0.1505	0.00163913	-0.0602899	0.757023	1.21125	0.357294	1.50198	0.219864	0.747636	0.33353
ENSG00000228049	POLR2J2	0.271554	0.00463356	0.00474617	0.0041918	-5.32195	3.01323e-201	-5.21418	7.47017e-80	-5.37506	3.51988e-104	-0.164182	1	0.580272	0.0360312	0.663756	0.303248	0.565018	0.120478
ENSG00000229117	RPL41	420.665	157.026	155.888	152.927	-1.42173	1.51253e-222	-1.43213	1.36269e-101	-1.45993	6.87512e-131	-0.0277987	1	0.74171	0.151215	0.898939	0.749515	1.05568	0.855806
ENSG00000229474	PATL2	0.635238	1.58487	1.57832	1.72303	1.31378	1.95331e-42	1.30718	1.00736e-24	1.4336	6.5804e-35	0.126382	0.875592	0.697245	0.0896465	0.410583	0.0110107	0.559208	0.0527297
ENSG00000232119	MCTS1	21.9149	23.4019	23.8182	23.1327	0.0943375	0.00685825	0.120375	0.0165243	0.0776552	0.0983819	-0.0427214	0.885069	1.29077	0.220657	1.59177	0.161989	1.46125	0.201612
ENSG00000233927	RPS28	372.234	231.074	196.596	218.765	-0.687931	1.22761e-26	-0.920955	1.82012e-23	-0.766898	9.61105e-21	0.154058	0.458704	0.762498	0.193784	0.798596	0.499626	1.16094	0.617161
ENSG00000234414	RBMY1A1	0.000106509	0	0	0	-0.0579564	1	-0.0528165	1	-0.0540946	1	0	1	0	0	NA	NA	NA	NA
ENSG00000239306	RBM14	46.6519	31.2499	30.1148	30.5587	-0.578208	5.58139e-44	-0.631527	1.53602e-25	-0.610452	2.41809e-29	0.0210773	1	0.495485	0.000749217	0.762482	0.417381	0.411832	0.00325023
ENSG00000239713	APOBEC3G	1.70411	10.4352	11.6996	9.72994	2.60897	4.57213e-303	2.77363	2.07256e-230	2.50777	6.49761e-212	-0.265917	0.127063	1.25503	0.275384	0.944533	0.864887	1.34847	0.320093
ENSG00000239789	MRPS17	13.1182	6.53512	6.12071	6.39782	-1.00739	9.66872e-157	-1.09934	5.53497e-90	-1.03792	6.37338e-100	0.0614399	0.740696	1.01152	0.956219	1.10075	0.773615	1.01585	0.958024
ENSG00000240344	PPIL3	9.51816	10.5203	11.0362	10.5831	0.144373	0.000486884	0.213515	0.000211666	0.152895	0.00406651	-0.0606246	0.807824	0.845118	0.424535	0.551477	0.0772902	0.861542	0.621136
ENSG00000240563	L1TD1	0.208566	0.40658	0.438879	0.373777	0.958062	1.18312e-12	1.06282	5.05714e-09	0.83806	8.0433e-07	-0.225306	0.741174	1.26638	0.259112	0.913475	0.785936	1.04684	0.878706
ENSG00000240682	ISY1	23.5313	15.9361	16.9047	15.4291	-0.563288	1.32793e-68	-0.477315	5.26667e-25	-0.609923	4.13504e-48	-0.132611	0.0846541	1.25209	0.281766	0.970952	0.929528	1.19285	0.556146
ENSG00000241058	NSUN6	13.6628	6.73906	5.71723	7.17311	-1.01882	1.07974e-146	-1.25561	3.29379e-108	-0.928665	2.85807e-77	0.326981	6.56662e-06	0.624937	0.0250466	0.827165	0.571001	0.765715	0.378925
ENSG00000241343	RPL36A	267.929	52.2608	47.117	48.8701	-2.35835	4.75835e-255	-2.50741	4.99886e-126	-2.45503	3.3787e-153	0.052381	1	1.16746	0.458259	0.956273	0.893451	1.24627	0.464835
ENSG00000241945	PWP2	21.4417	0.934239	0.898009	1.06595	-4.51553	6.97598e-241	-4.57144	2.23342e-99	-4.32597	1.0534e-116	0.245706	0.581848	0.754353	0.175892	0.780066	0.457831	0.708948	0.24734
ENSG00000241962	RP11-111H13.1	0.0532846	0.306576	0.273673	0.33411	2.47068	6.68873e-215	2.31014	5.56402e-120	2.59076	4.61034e-181	0.279853	0.0628545	0.857694	0.463829	NA	NA	NA	NA
ENSG00000242265	PEG10	16.113	31.7586	24.5972	18.4606	0.978914	7.06264e-18	0.610289	1.9166e-05	0.19656	0.178117	-0.413743	0.0992079	0.715382	0.107312	1.15881	0.658555	0.491306	0.0161915
ENSG00000242372	EIF6	45.7634	103.605	107.949	104.74	1.17858	2.18672e-173	1.2379	8.31013e-111	1.19432	2.14384e-121	-0.0435887	0.955387	1.59397	0.0252874	1.12792	0.718256	1.00082	0.997808
ENSG00000242389	RBMY1E	0.000179379	0	0	0	-0.110615	0.794949	-0.10065	1	-0.103136	1	0	1	0	0	NA	NA	NA	NA
ENSG00000242485	MRPL20	39.3282	47.5144	44.8457	47.833	0.272562	2.00791e-12	0.189348	0.000706581	0.282157	9.61595e-09	0.0928095	0.494663	0.904913	0.631748	1.12812	0.717451	0.776473	0.39498
ENSG00000242875	RBMY1B	0	0	0	0	0	1	0	1	0	1	0	1	0	0	NA	NA	NA	NA
ENSG00000243147	MRPL33	22.2841	21.0453	20.6345	19.8756	-0.0827169	0.0552158	-0.110839	0.0746534	-0.165453	0.00199855	-0.0546148	0.846	0.820631	0.343348	0.764064	0.420972	1.0024	0.993592
ENSG00000243927	MRPS6	12.0804	18.9261	20.3179	19.7993	0.648035	3.08796e-38	0.750816	5.47819e-30	0.712934	3.48923e-32	-0.0378864	1	1.19973	0.38365	0.810187	0.52761	1.0394	0.897087
ENSG00000244395	RBMY1D	0	0	0	0	0	1	0	1	0	1	0	1	0	0	NA	NA	NA	NA
ENSG00000244462	RBM12	35.2147	45.1042	45.6258	43.7654	0.357234	1.65558e-31	0.373704	1.63273e-18	0.313808	7.20042e-16	-0.0598968	0.654224	1.26875	0.25353	0.935902	0.843405	1.19155	0.557021
ENSG00000247626	MARS2	7.82125	5.22411	4.9519	5.54004	-0.581174	6.93475e-31	-0.658306	3.35499e-19	-0.496473	4.127e-14	0.161859	0.247723	1.16102	0.474505	0.81337	0.537258	0.791599	0.433105
ENSG00000253626	EIF5AL1	1.49613	2.35834	2.30203	2.39812	0.65558	3.79531e-07	0.621016	0.000607729	0.679279	3.09047e-05	0.058256	1	1.04693	0.825901	0.726152	0.338004	1.35437	0.307221
ENSG00000253729	PRKDC	78.8643	104.822	118.629	94.4344	0.410551	9.40899e-21	0.589033	1.65824e-23	0.260048	3.21093e-06	-0.328986	0.000119564	1.45946	0.0724677	1.69371	0.114855	1.19588	0.55286
ENSG00000253797	UTP14C	18.4523	21.4858	19.8806	22.262	0.220489	4.06977e-09	0.108389	0.0551567	0.271768	8.25243e-09	0.163382	0.0613118	0.997886	0.991908	1.26786	0.476124	0.919293	0.777741
ENSG00000254093	PINX1	6.49434	5.33206	4.90185	5.82258	-0.290738	1.81047e-06	-0.406019	3.49112e-06	-0.167618	0.0474822	0.23843	0.0958166	1.12288	0.578218	0.901004	0.75474	1.27187	0.419805
ENSG00000254535	PABPC4L	0.688826	1.23275	1.38935	1.16714	0.840103	3.9186e-22	1.01117	3.81051e-18	0.760336	2.56705e-12	-0.251016	0.334092	0.941374	0.772193	0.549282	0.0796646	1.00628	0.983345
ENSG00000254726	MEX3A	1.42644	4.48592	5.53994	3.93921	1.64695	3.00747e-98	1.95121	1.96555e-87	1.45966	1.60554e-55	-0.491657	0.00210583	1.20837	0.363303	1.01396	0.966816	0.691538	0.214468
ENSG00000254772	EEF1G	1185.59	0.50061	0.425043	0.489233	-11.2389	0	-11.4417	0	-11.2568	0	0.185313	0.332185	1.24827	0.287588	0.85881	0.647626	1.33223	0.340245
ENSG00000255561	FDXACB1	2.61785	1.49564	1.60118	1.39588	-0.810449	4.97894e-69	-0.709727	1.39136e-26	-0.909692	4.3858e-51	-0.200023	0.0652341	1.04555	0.830828	0.510246	0.0481623	0.821833	0.512398
ENSG00000257218	GATC	20.2233	14.9163	13.9225	15.0114	-0.438683	9.70603e-34	-0.537809	5.10782e-25	-0.429683	3.56418e-20	0.108133	0.300878	0.975267	0.904487	0.912542	0.783903	1.01079	0.97135
ENSG00000258436	RNASE12	0.000230543	8.57414e-05	0	0	-0.0617403	0.976676	-0.10455	1	-0.107017	1	0	1	0	0	NA	NA	NA	NA
ENSG00000258818	RNASE4	35.2728	2.93886	1.89605	3.11179	-3.58521	0	-4.21441	3.48549e-278	-3.50284	1.76366e-267	0.711788	3.30691e-09	0.7144	0.107199	0.399237	0.00716111	1.59159	0.116569
ENSG00000259494	MRPL46	2.83621	7.7575	7.41814	7.91213	1.44917	0	1.38584	5.04938e-201	1.47682	4.49438e-271	0.0909688	0.416758	0.875471	0.524173	1.14021	0.693649	0.876943	0.661369
ENSG00000262814	MRPL12	30.2364	12.7817	11.9599	11.9597	-1.24309	7.98285e-76	-1.33804	9.29405e-41	-1.33864	1.54988e-50	-0.000595982	1	0.85163	0.441108	1.40992	0.301099	0.608137	0.095931
ENSG00000265681	RPL17	925.006	21.4951	20.4073	19.4544	-5.42755	0	-5.50195	0	-5.57168	0	-0.0697346	0.770225	0.86447	0.484917	1.38138	0.331066	0.884519	0.680529
ENSG00000266967	AARSD1	23.7252	3.53487	3.50339	3.51035	-2.74803	0	-2.75981	0	-2.75851	0	0.00132219	1	0.523662	0.00206063	0.602901	0.134682	0.785904	0.418961
ENSG00000269058	CALR3	0.052209	0.01346	0.00881348	0.0129149	-1.79768	9.91789e-25	-2.27089	6.01769e-17	-1.79677	4.31897e-15	0.504608	0.451142	0.699162	0.0847365	1.50979	0.216099	0.662419	0.16427
