# Supplementary material for: RNA Binding Proteins as Drivers and Therapeutic Target Candidates in Pancreatic Ductal Adenocarcinoma
Source: Int J Mol Sci. 2020 Jun 11;21(11):4190. doi: 10.3390/ijms21114190 (PMC7312628; doi:10.3390/ijms21114190)
Supplement: Supplementary file 1 [file ijms-21-04190-s001.zip]

Archive with 9 entries (9 files):
- S1.xlsx
- S2.xlsx
- S3.xlsx
- S4.xlsx
- S5.xlsx
- S6.xlsx
- S7.xlsx
- S8.xlsx
- supplementary_figures.pdf
