# Supplementary material for: RNA Binding Proteins as Drivers and Therapeutic Target Candidates in Pancreatic Ductal Adenocarcinoma
Source: Int J Mol Sci. 2020 Jun 11;21(11):4190. doi: 10.3390/ijms21114190 (PMC7312628; doi:10.3390/ijms21114190)
Supplement: Supplementary file 1 [file ijms-21-04190-s001.zip › S1.xlsx]

## Sheet: Tabelle1
NAME	ES	NES	FDR.q.val
NABA_MATRISOME	0.316319	11.4553	0
POOLA_INVASIVE_BREAST_CANCER_UP	0.577712	11.1346	0
SCHUETZ_BREAST_CANCER_DUCTAL_INVASIVE_UP	0.513508	10.7378	0
ANDERSEN_CHOLANGIOCARCINOMA_CLASS2	0.662558	10.0959	0
CHEN_METABOLIC_SYNDROM_NETWORK	0.264001	10.0315	0
SMID_BREAST_CANCER_LUMINAL_B_DN	0.377276	9.99602	0
GRUETZMANN_PANCREATIC_CANCER_UP	0.460981	9.81428	0
NABA_MATRISOME_ASSOCIATED	0.304136	9.32456	0
WALLACE_PROSTATE_CANCER_RACE_UP	0.490586	9.2912	0
DELYS_THYROID_CANCER_UP	0.375585	9.06581	0
SMID_BREAST_CANCER_NORMAL_LIKE_UP	0.36485	8.93445	0
MEISSNER_BRAIN_HCP_WITH_H3K4ME3_AND_H3K27ME3	0.24431	8.69025	0
RODWELL_AGING_KIDNEY_UP	0.358917	8.52642	0
BENPORATH_ES_WITH_H3K27ME3	0.228963	8.39823	0
CHICAS_RB1_TARGETS_CONFLUENT	0.31373	8.39633	0
BENPORATH_SUZ12_TARGETS	0.235177	8.26419	0
SMID_BREAST_CANCER_BASAL_UP	0.289537	8.2159	0
CHARAFE_BREAST_CANCER_LUMINAL_VS_MESENCHYMAL_DN	0.332773	8.06666	0
MCLACHLAN_DENTAL_CARIES_UP	0.455624	8.02588	0
ONDER_CDH1_TARGETS_2_DN	0.315179	7.6719	0
BENPORATH_EED_TARGETS	0.22294	7.6683	0
CHARAFE_BREAST_CANCER_LUMINAL_VS_BASAL_DN	0.317569	7.49223	0
FLORIO_NEOCORTEX_BASAL_RADIAL_GLIA_DN	0.478094	7.48574	0
LIM_MAMMARY_STEM_CELL_UP	0.297245	7.35129	0
OISHI_CHOLANGIOMA_STEM_CELL_LIKE_DN	0.387743	7.30169	0
LINDGREN_BLADDER_CANCER_CLUSTER_2B	0.330978	7.27763	0
ROSTY_CERVICAL_CANCER_PROLIFERATION_CLUSTER	0.533038	7.19757	0
HOSHIDA_LIVER_CANCER_SUBCLASS_S1	0.413412	7.19625	0
BENPORATH_PRC2_TARGETS	0.252375	7.13169	0
HELLER_SILENCED_BY_METHYLATION_UP	0.382139	7.10525	0
VERHAAK_GLIOBLASTOMA_MESENCHYMAL	0.419201	7.05235	0
ANASTASSIOU_MULTICANCER_INVASIVENESS_SIGNATURE	0.718174	6.89467	0
REN_ALVEOLAR_RHABDOMYOSARCOMA_DN	0.296583	6.88982	0
VECCHI_GASTRIC_CANCER_ADVANCED_VS_EARLY_UP	0.457789	6.81468	0
PASINI_SUZ12_TARGETS_DN	0.33586	6.79539	0
QI_PLASMACYTOMA_UP	0.373024	6.78652	0
NABA_ECM_REGULATORS	0.376629	6.71212	0
MIKKELSEN_MEF_HCP_WITH_H3K27ME3	0.24529	6.60104	0
NAKAYAMA_SOFT_TISSUE_TUMORS_PCA2_UP	0.596312	6.58709	0
NABA_CORE_MATRISOME	0.344008	6.55851	0
WANG_SMARCE1_TARGETS_UP	0.334816	6.50833	0
GOLDRATH_ANTIGEN_RESPONSE	0.308653	6.42885	0
VECCHI_GASTRIC_CANCER_EARLY_UP	0.281985	6.42319	0
LIU_PROSTATE_CANCER_DN	0.263031	6.40013	0
MIKKELSEN_NPC_HCP_WITH_H3K27ME3	0.309003	6.38841	0
JAATINEN_HEMATOPOIETIC_STEM_CELL_DN	0.377538	6.36072	0
LI_INDUCED_T_TO_NATURAL_KILLER_UP	0.322986	6.34438	0
VERHAAK_AML_WITH_NPM1_MUTATED_UP	0.413084	6.32892	0
MIKKELSEN_MCV6_HCP_WITH_H3K27ME3	0.264114	6.30151	0
WU_CELL_MIGRATION	0.40602	6.30129	0
WIELAND_UP_BY_HBV_INFECTION	0.555481	6.2996	0
KOBAYASHI_EGFR_SIGNALING_24HR_DN	0.345058	6.20318	0
MARTENS_TRETINOIN_RESPONSE_UP	0.196522	6.19034	0
JAEGER_METASTASIS_DN	0.326026	6.13631	0
SOTIRIOU_BREAST_CANCER_GRADE_1_VS_3_UP	0.436023	6.11877	0
NAKAYAMA_SOFT_TISSUE_TUMORS_PCA1_UP	0.625211	6.11454	0
MARKEY_RB1_ACUTE_LOF_DN	0.35767	6.07875	0
GAL_LEUKEMIC_STEM_CELL_DN	0.340162	6.05352	0
SHEDDEN_LUNG_CANCER_POOR_SURVIVAL_A6	0.247882	5.99713	0
TAKEDA_TARGETS_OF_NUP98_HOXA9_FUSION_16D_UP	0.404609	5.99403	0
CHIANG_LIVER_CANCER_SUBCLASS_CTNNB1_DN	0.400367	5.97984	0
MEISSNER_BRAIN_HCP_WITH_H3K27ME3	0.31257	5.9667	0
FLECHNER_BIOPSY_KIDNEY_TRANSPLANT_REJECTED_VS_OK_UP	0.556289	5.94695	0
MEISSNER_NPC_HCP_WITH_H3K4ME2_AND_H3K27ME3	0.283154	5.92729	0
BOQUEST_STEM_CELL_UP	0.317528	5.86061	0
THUM_SYSTOLIC_HEART_FAILURE_UP	0.251815	5.83199	0
SERVITJA_ISLET_HNF1A_TARGETS_UP	0.389764	5.76958	0
REACTOME_GPCR_LIGAND_BINDING	0.259011	5.76684	0
PICCALUGA_ANGIOIMMUNOBLASTIC_LYMPHOMA_UP	0.357845	5.75112	0
LINDGREN_BLADDER_CANCER_CLUSTER_1_DN	0.258898	5.73996	0
CHANG_CYCLING_GENES	0.412641	5.72272	0
KEGG_CYTOKINE_CYTOKINE_RECEPTOR_INTERACTION	0.3136	5.67956	0
SMIRNOV_CIRCULATING_ENDOTHELIOCYTES_IN_CANCER_UP	0.392459	5.65637	0
LEE_EARLY_T_LYMPHOCYTE_UP	0.477086	5.63587	0
NUYTTEN_EZH2_TARGETS_UP	0.158248	5.58459	0
BASAKI_YBX1_TARGETS_UP	0.288423	5.54193	0
REACTOME_CLASS_A1_RHODOPSIN_LIKE_RECEPTORS	0.292187	5.53959	0
NABA_SECRETED_FACTORS	0.268203	5.53915	0
REACTOME_PEPTIDE_LIGAND_BINDING_RECEPTORS	0.362556	5.53799	0
REACTOME_HEMOSTASIS	0.227248	5.50802	0
CHIANG_LIVER_CANCER_SUBCLASS_PROLIFERATION_UP	0.375951	5.50081	0
CHICAS_RB1_TARGETS_SENESCENT	0.204248	5.48578	0
ZWANG_TRANSIENTLY_UP_BY_2ND_EGF_PULSE_ONLY	0.127594	5.48148	0
KEGG_GRAFT_VERSUS_HOST_DISEASE	0.755744	5.45609	0
BOQUEST_STEM_CELL_CULTURED_VS_FRESH_UP	0.233024	5.43879	0
MIYAGAWA_TARGETS_OF_EWSR1_ETS_FUSIONS_DN	0.328925	5.423	0
MEISSNER_NPC_HCP_WITH_H3K4ME2	0.216655	5.40445	0
FULCHER_INFLAMMATORY_RESPONSE_LECTIN_VS_LPS_UP	0.202484	5.39245	0
ICHIBA_GRAFT_VERSUS_HOST_DISEASE_35D_UP	0.408496	5.36733	0
SABATES_COLORECTAL_ADENOMA_DN	0.283594	5.35935	0
KIM_GLIS2_TARGETS_UP	0.508796	5.35088	0
PETROVA_ENDOTHELIUM_LYMPHATIC_VS_BLOOD_DN	0.365557	5.34188	0
RIGGI_EWING_SARCOMA_PROGENITOR_DN	0.346329	5.33823	0
BROWN_MYELOID_CELL_DEVELOPMENT_UP	0.365218	5.33617	0
SWEET_LUNG_CANCER_KRAS_DN	0.223506	5.32981	0
PLASARI_TGFB1_TARGETS_10HR_UP	0.326441	5.32486	0
RODWELL_AGING_KIDNEY_NO_BLOOD_UP	0.319121	5.32274	0
TURASHVILI_BREAST_LOBULAR_CARCINOMA_VS_DUCTAL_NORMAL_UP	0.548365	5.32263	0
TAKEDA_TARGETS_OF_NUP98_HOXA9_FUSION_10D_UP	0.355255	5.32244	0
GAURNIER_PSMD4_TARGETS	0.568032	5.28639	0
FISCHER_G2_M_CELL_CYCLE	0.300263	5.27246	0
WANG_MLL_TARGETS	0.274252	5.25715	0
KANG_DOXORUBICIN_RESISTANCE_UP	0.602154	5.24688	0
HELLER_HDAC_TARGETS_SILENCED_BY_METHYLATION_UP	0.219947	5.24248	0
SMID_BREAST_CANCER_RELAPSE_IN_BONE_DN	0.26225	5.21398	0
GAVIN_FOXP3_TARGETS_CLUSTER_P6	0.468917	5.19093	0
SABATES_COLORECTAL_ADENOMA_UP	0.379238	5.15299	0
DURAND_STROMA_S_UP	0.269557	5.11793	0
TONKS_TARGETS_OF_RUNX1_RUNX1T1_FUSION_ERYTHROCYTE_UP	0.351967	5.10928	0
JISON_SICKLE_CELL_DISEASE_UP	0.325201	5.08972	0
RIGGI_EWING_SARCOMA_PROGENITOR_UP	0.216598	5.08749	0
CROMER_TUMORIGENESIS_UP	0.573255	5.06725	0
LEI_MYB_TARGETS	0.254038	5.06281	0
GOZGIT_ESR1_TARGETS_DN	0.173625	5.06278	0
ALTEMEIER_RESPONSE_TO_LPS_WITH_MECHANICAL_VENTILATION	0.388907	5.03404	0
VERHAAK_AML_WITH_NPM1_MUTATED_DN	0.285764	5.02382	0
RICKMAN_TUMOR_DIFFERENTIATED_WELL_VS_POORLY_DN	0.231294	5.014	0
ZHENG_GLIOBLASTOMA_PLASTICITY_UP	0.284004	5.00865	0
WONG_ADULT_TISSUE_STEM_MODULE	0.161126	4.99608	0
RUTELLA_RESPONSE_TO_HGF_UP	0.216579	4.9922	0
FARMER_BREAST_CANCER_CLUSTER_1	0.686155	4.99155	0
PILON_KLF1_TARGETS_DN	0.102742	4.99007	0
TURASHVILI_BREAST_LOBULAR_CARCINOMA_VS_LOBULAR_NORMAL_DN	0.499796	4.98745	0
ACEVEDO_FGFR1_TARGETS_IN_PROSTATE_CANCER_MODEL_UP	0.260206	4.98514	0
HECKER_IFNB1_TARGETS	0.448554	4.97889	0
ROZANOV_MMP14_TARGETS_UP	0.274751	4.97159	0
CROONQUIST_IL6_DEPRIVATION_DN	0.421954	4.96192	0
RUTELLA_RESPONSE_TO_HGF_VS_CSF2RB_AND_IL4_UP	0.224858	4.95536	0
ZHAN_MULTIPLE_MYELOMA_PR_UP	0.62022	4.95013	0
TAKEDA_TARGETS_OF_NUP98_HOXA9_FUSION_8D_DN	0.311596	4.94527	0
SEITZ_NEOPLASTIC_TRANSFORMATION_BY_8P_DELETION_UP	0.496716	4.93265	0
RUIZ_TNC_TARGETS_DN	0.361299	4.92896	0
ZWANG_CLASS_1_TRANSIENTLY_INDUCED_BY_EGF	0.197786	4.91336	0
NABA_ECM_GLYCOPROTEINS	0.301071	4.9088	0
GOBERT_OLIGODENDROCYTE_DIFFERENTIATION_UP	0.185525	4.90637	0
BOSCO_TH1_CYTOTOXIC_MODULE	0.407305	4.89835	0
KOINUMA_TARGETS_OF_SMAD2_OR_SMAD3	0.15557	4.89163	0
MCBRYAN_PUBERTAL_BREAST_4_5WK_UP	0.257787	4.88803	0
KEGG_HEMATOPOIETIC_CELL_LINEAGE	0.451218	4.86082	0
ISSAEVA_MLL2_TARGETS	0.554459	4.85954	0
BERENJENO_TRANSFORMED_BY_RHOA_UP	0.1826	4.85365	0
YANG_BCL3_TARGETS_UP	0.225978	4.85344	0
MCBRYAN_PUBERTAL_BREAST_3_4WK_UP	0.288179	4.85273	0
MIYAGAWA_TARGETS_OF_EWSR1_ETS_FUSIONS_UP	0.261502	4.85222	0
SATO_SILENCED_BY_METHYLATION_IN_PANCREATIC_CANCER_1	0.208281	4.84657	0
LIAN_LIPA_TARGETS_3M	0.542613	4.82771	0
KEGG_ALLOGRAFT_REJECTION	0.696493	4.82517	0
SARRIO_EPITHELIAL_MESENCHYMAL_TRANSITION_UP	0.329496	4.82207	0
SENESE_HDAC1_AND_HDAC2_TARGETS_UP	0.274721	4.81171	0
KEGG_CELL_ADHESION_MOLECULES_CAMS	0.364104	4.81026	0
IGLESIAS_E2F_TARGETS_UP	0.338874	4.80469	0
TAKEDA_TARGETS_OF_NUP98_HOXA9_FUSION_3D_UP	0.315458	4.80313	0
BURTON_ADIPOGENESIS_3	0.410884	4.79951	0
REACTOME_GASTRIN_CREB_SIGNALLING_PATHWAY_VIA_PKC_AND_MAPK	0.291892	4.7852	0
SHEN_SMARCA2_TARGETS_DN	0.230593	4.78004	0
CHYLA_CBFA2T3_TARGETS_UP	0.213433	4.77111	0
SENGUPTA_NASOPHARYNGEAL_CARCINOMA_UP	0.251651	4.77065	0
KONG_E2F3_TARGETS	0.419615	4.76512	0
SANA_RESPONSE_TO_IFNG_UP	0.464687	4.75512	0
TONKS_TARGETS_OF_RUNX1_RUNX1T1_FUSION_HSC_DN	0.310842	4.75501	0
BOYLAN_MULTIPLE_MYELOMA_C_D_DN	0.265665	4.75256	0
HOLLERN_EMT_BREAST_TUMOR_UP	0.403088	4.74105	0
TAKEDA_TARGETS_OF_NUP98_HOXA9_FUSION_8D_UP	0.335723	4.73856	0
GRAHAM_CML_DIVIDING_VS_NORMAL_QUIESCENT_UP	0.307877	4.73721	0
ICHIBA_GRAFT_VERSUS_HOST_DISEASE_D7_UP	0.394052	4.724	0
LIANG_SILENCED_BY_METHYLATION_2	0.569239	4.72128	0
PHONG_TNF_RESPONSE_NOT_VIA_P38	0.228573	4.69875	0
REACTOME_G_ALPHA_Q_SIGNALLING_EVENTS	0.30302	4.69725	0
KEGG_TYPE_I_DIABETES_MELLITUS	0.63633	4.6935	0
SMIRNOV_RESPONSE_TO_IR_6HR_DN	0.380411	4.68356	0
LIAN_LIPA_TARGETS_6M	0.467814	4.68326	0
DAVICIONI_TARGETS_OF_PAX_FOXO1_FUSIONS_UP	0.250467	4.66186	0
SANSOM_APC_TARGETS_DN	0.222997	4.6471	0
HUPER_BREAST_BASAL_VS_LUMINAL_UP	0.538498	4.64202	0
YOSHIMURA_MAPK8_TARGETS_UP	0.117955	4.63234	0
AFFAR_YY1_TARGETS_DN	0.270228	4.62547	0
ONDER_CDH1_TARGETS_2_UP	0.25802	4.62468	0
HUANG_DASATINIB_RESISTANCE_UP	0.449062	4.5977	0
BLALOCK_ALZHEIMERS_DISEASE_DN	0.117673	4.59753	0
ZHANG_RESPONSE_TO_IKK_INHIBITOR_AND_TNF_UP	0.271129	4.59687	0
LENAOUR_DENDRITIC_CELL_MATURATION_UP	0.373811	4.59466	0
REACTOME_PLATELET_ACTIVATION_SIGNALING_AND_AGGREGATION	0.290447	4.58737	0
SCHAEFFER_PROSTATE_DEVELOPMENT_48HR_DN	0.195379	4.58699	0
REACTOME_IMMUNOREGULATORY_INTERACTIONS_BETWEEN_A_LYMPHOID_AND_A_NON_LYMPHOID_CELL	0.510902	4.58597	0
KINSEY_TARGETS_OF_EWSR1_FLII_FUSION_DN	0.221448	4.58097	0
NAKAMURA_TUMOR_ZONE_PERIPHERAL_VS_CENTRAL_UP	0.242382	4.58056	0
DUTERTRE_ESTRADIOL_RESPONSE_24HR_UP	0.225038	4.57215	0
RICKMAN_METASTASIS_DN	0.253166	4.56357	0
FLORIO_NEOCORTEX_BASAL_RADIAL_GLIA_UP	0.202996	4.56277	0
TAKEDA_TARGETS_OF_NUP98_HOXA9_FUSION_10D_DN	0.359481	4.55666	0
REACTOME_G_ALPHA_I_SIGNALLING_EVENTS	0.298129	4.54572	0
KATSANOU_ELAVL1_TARGETS_UP	0.302795	4.54393	0
CROONQUIST_NRAS_SIGNALING_DN	0.44783	4.54295	0
SENGUPTA_NASOPHARYNGEAL_CARCINOMA_WITH_LMP1_DN	0.316072	4.52392	0
VANTVEER_BREAST_CANCER_ESR1_DN	0.257453	4.51603	0
KEGG_SYSTEMIC_LUPUS_ERYTHEMATOSUS	0.3936	4.50655	0
BRUECKNER_TARGETS_OF_MIRLET7A3_DN	0.455805	4.50251	0
PID_INTEGRIN1_PATHWAY	0.460535	4.48849	0
RODRIGUES_THYROID_CARCINOMA_POORLY_DIFFERENTIATED_UP	0.160052	4.47986	0
VART_KSHV_INFECTION_ANGIOGENIC_MARKERS_UP	0.297939	4.47527	0
MEISSNER_NPC_HCP_WITH_H3_UNMETHYLATED	0.172332	4.47319	0
CROONQUIST_NRAS_VS_STROMAL_STIMULATION_DN	0.374089	4.46036	0
WESTON_VEGFA_TARGETS	0.381874	4.45853	0
CONCANNON_APOPTOSIS_BY_EPOXOMICIN_DN	0.307017	4.45634	0
CHIARADONNA_NEOPLASTIC_TRANSFORMATION_KRAS_UP	0.337611	4.44498	0
KUMAR_TARGETS_OF_MLL_AF9_FUSION	0.201953	4.43972	0
WHITEFORD_PEDIATRIC_CANCER_MARKERS	0.368879	4.4286	0
LIN_SILENCED_BY_TUMOR_MICROENVIRONMENT	0.381433	4.42633	0
TARTE_PLASMA_CELL_VS_PLASMABLAST_UP	0.203974	4.41665	0
FOSTER_KDM1A_TARGETS_UP	0.246385	4.41218	0
LEE_NEURAL_CREST_STEM_CELL_UP	0.322504	4.4093	0
SENGUPTA_NASOPHARYNGEAL_CARCINOMA_DN	0.21994	4.40468	0
LEE_BMP2_TARGETS_UP	0.147989	4.39534	0
COLINA_TARGETS_OF_4EBP1_AND_4EBP2	0.203413	4.39122	0
REACTOME_INTERFERON_GAMMA_SIGNALING	0.501466	4.38154	0
WANG_RESPONSE_TO_GSK3_INHIBITOR_SB216763_DN	0.203245	4.37786	0
DODD_NASOPHARYNGEAL_CARCINOMA_DN	0.108694	4.37732	0
DODD_NASOPHARYNGEAL_CARCINOMA_UP	0.100433	4.37685	0
BILD_HRAS_ONCOGENIC_SIGNATURE	0.245072	4.37619	0
RICKMAN_HEAD_AND_NECK_CANCER_C	0.371759	4.36547	0
CHICAS_RB1_TARGETS_GROWING	0.251068	4.35317	0
KUROZUMI_RESPONSE_TO_ONCOCYTIC_VIRUS	0.57688	4.34983	0
LEE_LIVER_CANCER_DENA_UP	0.483892	4.33185	0
REACTOME_EXTRACELLULAR_MATRIX_ORGANIZATION	0.416305	4.31693	0
HELLEBREKERS_SILENCED_DURING_TUMOR_ANGIOGENESIS	0.413055	4.30001	0
NUYTTEN_NIPP1_TARGETS_DN	0.130539	4.27491	0
KINSEY_TARGETS_OF_EWSR1_FLII_FUSION_UP	0.11248	4.27305	0
MIKKELSEN_NPC_HCP_WITH_H3K4ME3_AND_H3K27ME3	0.259051	4.2675	0
KEGG_CHEMOKINE_SIGNALING_PATHWAY	0.275435	4.25854	0
REACTOME_CHEMOKINE_RECEPTORS_BIND_CHEMOKINES	0.53786	4.25785	0
BRUINS_UVC_RESPONSE_VIA_TP53_GROUP_B	0.166284	4.25659	0
FULCHER_INFLAMMATORY_RESPONSE_LECTIN_VS_LPS_DN	0.17645	4.21575	0
FORTSCHEGGER_PHF8_TARGETS_DN	0.136789	4.21105	0
ODONNELL_TFRC_TARGETS_DN	0.316656	4.20322	0
SASAKI_ADULT_T_CELL_LEUKEMIA	0.27475	4.19586	0
KIM_ALL_DISORDERS_CALB1_CORR_UP	0.157615	4.1952	0
PID_SYNDECAN_1_PATHWAY	0.541241	4.18534	0
SANA_TNF_SIGNALING_UP	0.387449	4.17591	0
KRASNOSELSKAYA_ILF3_TARGETS_UP	0.565491	4.16952	0
KEGG_ECM_RECEPTOR_INTERACTION	0.385842	4.16589	0
RODRIGUES_THYROID_CARCINOMA_ANAPLASTIC_UP	0.138489	4.16489	0
GRAHAM_NORMAL_QUIESCENT_VS_NORMAL_DIVIDING_DN	0.377454	4.1587	0
ALCALAY_AML_BY_NPM1_LOCALIZATION_DN	0.262415	4.14144	0
KIM_WT1_TARGETS_UP	0.248271	4.13974	0
BURTON_ADIPOGENESIS_8	0.377407	4.13786	0
HORIUCHI_WTAP_TARGETS_DN	0.20942	4.13398	0
TANG_SENESCENCE_TP53_TARGETS_DN	0.475726	4.13366	0
MORI_IMMATURE_B_LYMPHOCYTE_DN	0.375044	4.1126	0
WEI_MYCN_TARGETS_WITH_E_BOX	0.135264	4.10884	0
WOO_LIVER_CANCER_RECURRENCE_UP	0.354161	4.10706	0
JECHLINGER_EPITHELIAL_TO_MESENCHYMAL_TRANSITION_UP	0.420221	4.10604	0
CERVERA_SDHB_TARGETS_1_UP	0.337989	4.09873	0
CASORELLI_ACUTE_PROMYELOCYTIC_LEUKEMIA_DN	0.14167	4.08693	0
PETROVA_ENDOTHELIUM_LYMPHATIC_VS_BLOOD_UP	0.31871	4.08591	0
KEGG_VIRAL_MYOCARDITIS	0.413696	4.08073	0
BROWNE_INTERFERON_RESPONSIVE_GENES	0.423059	4.07388	0
ACEVEDO_FGFR1_TARGETS_IN_PROSTATE_CANCER_MODEL_DN	0.202794	4.05776	0
ZHOU_CELL_CYCLE_GENES_IN_IR_RESPONSE_24HR	0.312645	4.04591	0
SWEET_LUNG_CANCER_KRAS_UP	0.157331	4.03827	0
BLUM_RESPONSE_TO_SALIRASIB_DN	0.192612	4.03412	0
ONDER_CDH1_TARGETS_3_DN	0.462506	4.03309	0
SENESE_HDAC1_TARGETS_UP	0.174345	4.03019	0
WINZEN_DEGRADED_VIA_KHSRP	0.345076	4.02337	0
DANG_REGULATED_BY_MYC_DN	0.220978	4.02058	0
SCHAEFFER_PROSTATE_DEVELOPMENT_48HR_UP	0.160764	4.01862	0
CLASPER_LYMPHATIC_VESSELS_DURING_METASTASIS_DN	0.562781	4.01379	0
AZARE_NEOPLASTIC_TRANSFORMATION_BY_STAT3_UP	0.317988	4.00199	0
MISSIAGLIA_REGULATED_BY_METHYLATION_UP	0.311846	3.99715	0
WHITFIELD_CELL_CYCLE_LITERATURE	0.49632	3.99257	0
PETROVA_PROX1_TARGETS_DN	0.426323	3.99125	0
REACTOME_AXON_GUIDANCE	0.226123	3.99125	0
WIERENGA_STAT5A_TARGETS_DN	0.249708	3.98972	0
SHEPARD_BMYB_MORPHOLINO_DN	0.257271	3.9812	0
MEISSNER_NPC_HCP_WITH_H3K27ME3	0.377658	3.97642	0
MORI_PRE_BI_LYMPHOCYTE_UP	0.395027	3.97071	0
YAGI_AML_WITH_T_8_21_TRANSLOCATION	0.180994	3.96186	0
LIU_VAV3_PROSTATE_CARCINOGENESIS_UP	0.366337	3.96014	0
RUTELLA_RESPONSE_TO_CSF2RB_AND_IL4_DN	0.196235	3.9584	0
LAIHO_COLORECTAL_CANCER_SERRATED_UP	0.325097	3.95767	0
MATSUDA_NATURAL_KILLER_DIFFERENTIATION	0.157442	3.94873	0
HUPER_BREAST_BASAL_VS_LUMINAL_DN	0.436032	3.94724	0
LINDVALL_IMMORTALIZED_BY_TERT_DN	0.382922	3.9469	0
LABBE_TARGETS_OF_TGFB1_AND_WNT3A_UP	0.332365	3.94649	0
MARSON_BOUND_BY_E2F4_UNSTIMULATED	0.133528	3.93435	0
HARRIS_HYPOXIA	0.373847	3.93018	0
NABA_ECM_AFFILIATED	0.261009	3.91243	0
WANG_ESOPHAGUS_CANCER_VS_NORMAL_UP	0.320468	3.90952	0
KEGG_INTESTINAL_IMMUNE_NETWORK_FOR_IGA_PRODUCTION	0.484846	3.90524	0
KEGG_AXON_GUIDANCE	0.304998	3.90516	0
HOFFMANN_LARGE_TO_SMALL_PRE_BII_LYMPHOCYTE_UP	0.266287	3.89891	0
RUTELLA_RESPONSE_TO_CSF2RB_AND_IL4_UP	0.190316	3.89866	0
REACTOME_IMMUNE_SYSTEM	0.117376	3.8924	0
KEGG_NATURAL_KILLER_CELL_MEDIATED_CYTOTOXICITY	0.29523	3.89189	0
WORSCHECH_TUMOR_REJECTION_UP	0.466216	3.8905	0
PUJANA_CHEK2_PCC_NETWORK	0.125178	3.88328	0
FISCHER_DREAM_TARGETS	0.115619	3.87756	0
PEDERSEN_METASTASIS_BY_ERBB2_ISOFORM_7	0.174826	3.87645	0
VILIMAS_NOTCH1_TARGETS_UP	0.465977	3.8753	0
WINTER_HYPOXIA_METAGENE	0.224043	3.86881	0
IZADPANAH_STEM_CELL_ADIPOSE_VS_BONE_UP	0.308253	3.86877	0
REACTOME_COLLAGEN_FORMATION	0.449203	3.86446	0
LE_EGR2_TARGETS_UP	0.327731	3.85757	0
SHIN_B_CELL_LYMPHOMA_CLUSTER_8	0.529821	3.85076	0
LENAOUR_DENDRITIC_CELL_MATURATION_DN	0.289963	3.84817	0
DIAZ_CHRONIC_MEYLOGENOUS_LEUKEMIA_DN	0.306158	3.84561	0
REACTOME_RESPONSE_TO_ELEVATED_PLATELET_CYTOSOLIC_CA2_	0.363173	3.84184	0
BOQUEST_STEM_CELL_DN	0.223266	3.8389	0
REACTOME_CELL_SURFACE_INTERACTIONS_AT_THE_VASCULAR_WALL	0.357335	3.83868	0
KONDO_EZH2_TARGETS	0.218531	3.83821	0
REACTOME_GLYCOSAMINOGLYCAN_METABOLISM	0.320443	3.81595	0
MCBRYAN_PUBERTAL_TGFB1_TARGETS_UP	0.254707	3.81392	0
TONKS_TARGETS_OF_RUNX1_RUNX1T1_FUSION_HSC_UP	0.249053	3.81119	0
SENESE_HDAC3_TARGETS_UP	0.15085	3.79952	0
JOHNSTONE_PARVB_TARGETS_3_UP	0.16937	3.79402	0
CHIARADONNA_NEOPLASTIC_TRANSFORMATION_KRAS_CDC25_UP	0.425193	3.79348	0
PARK_TRETINOIN_RESPONSE_AND_PML_RARA_FUSION	0.59341	3.7916	0
HESS_TARGETS_OF_HOXA9_AND_MEIS1_DN	0.378752	3.78573	0
DUTERTRE_ESTRADIOL_RESPONSE_24HR_DN	0.150854	3.78112	0
MIKKELSEN_IPS_WITH_HCP_H3K27ME3	0.325787	3.7784	0
MIKKELSEN_MEF_LCP_WITH_H3K4ME3	0.3045	3.77435	0
DAVICIONI_MOLECULAR_ARMS_VS_ERMS_DN	0.254903	3.77288	0
FARMER_BREAST_CANCER_CLUSTER_4	0.712052	3.77158	0
TURASHVILI_BREAST_DUCTAL_CARCINOMA_VS_DUCTAL_NORMAL_UP	0.483061	3.7715	0
BENPORATH_PROLIFERATION	0.278658	3.76811	0
MOHANKUMAR_HOXA1_TARGETS_DN	0.247445	3.76449	0
AMUNDSON_GAMMA_RADIATION_RESPONSE	0.501045	3.76024	0
KEGG_LEISHMANIA_INFECTION	0.390945	3.75663	0
REACTOME_SEMAPHORIN_INTERACTIONS	0.405049	3.75186	0
LIEN_BREAST_CARCINOMA_METAPLASTIC_VS_DUCTAL_UP	0.366601	3.74861	0
PID_INTEGRIN2_PATHWAY	0.588974	3.74801	0
KEGG_FOCAL_ADHESION	0.22903	3.74295	0
GAUSSMANN_MLL_AF4_FUSION_TARGETS_F_UP	0.240563	3.73784	0
BASSO_CD40_SIGNALING_UP	0.316941	3.72626	0
HOLLERN_SQUAMOUS_BREAST_TUMOR	0.295291	3.72574	0
BROWNE_HCMV_INFECTION_48HR_DN	0.150089	3.7251	0
FEVR_CTNNB1_TARGETS_UP	0.129491	3.72315	0
MARKEY_RB1_CHRONIC_LOF_DN	0.298695	3.71274	0
HINATA_NFKB_TARGETS_KERATINOCYTE_UP	0.334458	3.70832	0
WEST_ADRENOCORTICAL_TUMOR_UP	0.188252	3.70533	0
WILENSKY_RESPONSE_TO_DARAPLADIB	0.589849	3.70232	0
LU_TUMOR_VASCULATURE_UP	0.576873	3.68303	0
GRAHAM_CML_DIVIDING_VS_NORMAL_QUIESCENT_DN	0.331271	3.68157	0
NADLER_OBESITY_UP	0.411281	3.68134	0
LEE_EARLY_T_LYMPHOCYTE_DN	0.426915	3.67751	0
KRIEG_HYPOXIA_VIA_KDM3A	0.427826	3.65482	0
TIEN_INTESTINE_PROBIOTICS_24HR_UP	0.140897	3.65472	0
TARTE_PLASMA_CELL_VS_PLASMABLAST_DN	0.177624	3.65418	0
BIOCARTA_THELPER_PATHWAY	0.863554	3.65202	0
REACTOME_TRANSLOCATION_OF_ZAP_70_TO_IMMUNOLOGICAL_SYNAPSE	0.841399	3.65178	0
PID_IL4_2PATHWAY	0.399846	3.64599	0
KAN_RESPONSE_TO_ARSENIC_TRIOXIDE	0.28378	3.64422	0
CHANG_CORE_SERUM_RESPONSE_UP	0.215555	3.64404	0
WESTON_VEGFA_TARGETS_6HR	0.41188	3.64387	0
MOLENAAR_TARGETS_OF_CCND1_AND_CDK4_DN	0.415296	3.64329	0
WUNDER_INFLAMMATORY_RESPONSE_AND_CHOLESTEROL_UP	0.408934	3.64218	0
KANG_GIST_WITH_PDGFRA_UP	0.444811	3.64195	0
ISHIDA_E2F_TARGETS	0.428504	3.63977	0
SHEPARD_BMYB_TARGETS	0.375299	3.6243	0
CERVERA_SDHB_TARGETS_2	0.304198	3.62125	0
NABA_COLLAGENS	0.461958	3.62034	0
ROZANOV_MMP14_TARGETS_SUBSET	0.549644	3.6199	0
MOSERLE_IFNA_RESPONSE	0.552609	3.61962	0
PID_UPA_UPAR_PATHWAY	0.477695	3.61828	0
SENESE_HDAC1_AND_HDAC2_TARGETS_DN	0.209926	3.61288	0
FOSTER_TOLERANT_MACROPHAGE_DN	0.157987	3.61246	0
GRAHAM_CML_QUIESCENT_VS_NORMAL_QUIESCENT_DN	0.465715	3.60945	0
HADDAD_T_LYMPHOCYTE_AND_NK_PROGENITOR_DN	0.398937	3.60601	0
DOUGLAS_BMI1_TARGETS_UP	0.137002	3.60593	0
KIM_RESPONSE_TO_TSA_AND_DECITABINE_UP	0.271931	3.60129	0
WU_APOPTOSIS_BY_CDKN1A_VIA_TP53	0.408324	3.59737	0
YU_MYC_TARGETS_UP	0.472537	3.59185	0
YAMASHITA_METHYLATED_IN_PROSTATE_CANCER	0.401894	3.57526	0
HATADA_METHYLATED_IN_LUNG_CANCER_UP	0.162139	3.57524	0
HOELZEL_NF1_TARGETS_UP	0.276498	3.57455	0
MORI_LARGE_PRE_BII_LYMPHOCYTE_DN	0.410352	3.5737	0
LEE_TARGETS_OF_PTCH1_AND_SUFU_DN	0.332304	3.56005	0
WIEDERSCHAIN_TARGETS_OF_BMI1_AND_PCGF2	0.394256	3.56001	0
BIOCARTA_TCYTOTOXIC_PATHWAY	0.838852	3.55445	0
BROWNE_HCMV_INFECTION_24HR_DN	0.249543	3.55175	0
MONTERO_THYROID_CANCER_POOR_SURVIVAL_UP	0.835498	3.55031	0
UROSEVIC_RESPONSE_TO_IMIQUIMOD	0.627729	3.54922	0
VANTVEER_BREAST_CANCER_METASTASIS_DN	0.281884	3.54187	0
JOHNSTONE_PARVB_TARGETS_3_DN	0.109585	3.54179	0
GREENBAUM_E2A_TARGETS_UP	0.527282	3.54097	0
JI_CARCINOGENESIS_BY_KRAS_AND_STK11_DN	0.724179	3.53981	0
ZHOU_INFLAMMATORY_RESPONSE_LPS_UP	0.159877	3.53971	0
VERRECCHIA_EARLY_RESPONSE_TO_TGFB1	0.397483	3.53937	0
KORKOLA_TERATOMA	0.477073	3.53824	0
PUJANA_BRCA1_PCC_NETWORK	0.0819531	3.53709	0
REACTOME_INTEGRIN_CELL_SURFACE_INTERACTIONS	0.346643	3.53556	0
REACTOME_ADAPTIVE_IMMUNE_SYSTEM	0.135161	3.53541	0
ACEVEDO_LIVER_CANCER_WITH_H3K27ME3_UP	0.191755	3.53204	0
BENPORATH_CYCLING_GENES	0.124099	3.52938	0
GU_PDEF_TARGETS_UP	0.350356	3.52782	0
KIM_LRRC3B_TARGETS	0.554714	3.52002	0
ZHOU_INFLAMMATORY_RESPONSE_FIMA_UP	0.142355	3.5189	0
FARMER_BREAST_CANCER_CLUSTER_2	0.525874	3.51849	0
MULLIGHAN_MLL_SIGNATURE_1_UP	0.158002	3.51403	0
GHANDHI_BYSTANDER_IRRADIATION_UP	0.327728	3.50835	0
PANGAS_TUMOR_SUPPRESSION_BY_SMAD1_AND_SMAD5_UP	0.272591	3.50741	0
RADAEVA_RESPONSE_TO_IFNA1_UP	0.417278	3.50628	0
RHODES_UNDIFFERENTIATED_CANCER	0.354345	3.50419	0
ENK_UV_RESPONSE_EPIDERMIS_DN	0.138132	3.50237	0
REACTOME_PHOSPHORYLATION_OF_CD3_AND_TCR_ZETA_CHAINS	0.750006	3.49514	0
LEE_LIVER_CANCER_ACOX1_UP	0.387598	3.4906	0
CORRE_MULTIPLE_MYELOMA_UP	0.361766	3.48548	0
GOZGIT_ESR1_TARGETS_UP	0.259389	3.48375	0
FOURNIER_ACINAR_DEVELOPMENT_LATE_2	0.180555	3.47722	0
LU_TUMOR_ENDOTHELIAL_MARKERS_UP	0.61652	3.47671	0
CREIGHTON_ENDOCRINE_THERAPY_RESISTANCE_3	0.117675	3.47387	0
LEE_LIVER_CANCER_E2F1_UP	0.376563	3.47313	0
CHIANG_LIVER_CANCER_SUBCLASS_INTERFERON_UP	0.562038	3.46955	0
KEGG_LEUKOCYTE_TRANSENDOTHELIAL_MIGRATION	0.274845	3.46523	0
JOHNSTONE_PARVB_TARGETS_2_UP	0.262642	3.4604	0
GRAESSMANN_RESPONSE_TO_MC_AND_SERUM_DEPRIVATION_UP	0.209259	3.45993	0
PEREZ_TP63_TARGETS	0.164863	3.45524	0
FERRANDO_TAL1_NEIGHBORS	0.633223	3.44868	0
TAKEDA_TARGETS_OF_NUP98_HOXA9_FUSION_6HR_UP	0.330391	3.44781	0
GALINDO_IMMUNE_RESPONSE_TO_ENTEROTOXIN	0.332864	3.44779	0
LINDVALL_IMMORTALIZED_BY_TERT_UP	0.339713	3.43284	0
TSAI_RESPONSE_TO_RADIATION_THERAPY	0.513077	3.43165	0
STEARMAN_LUNG_CANCER_EARLY_VS_LATE_DN	0.393485	3.42899	0
JAEGER_METASTASIS_UP	0.43675	3.42871	0
PLASARI_TGFB1_TARGETS_10HR_DN	0.189016	3.42588	0
SMID_BREAST_CANCER_RELAPSE_IN_PLEURA_DN	0.594263	3.42553	0
CROONQUIST_STROMAL_STIMULATION_UP	0.384586	3.41955	0
MIKKELSEN_IPS_LCP_WITH_H3K4ME3	0.238592	3.41933	0
TURASHVILI_BREAST_DUCTAL_CARCINOMA_VS_DUCTAL_NORMAL_DN	0.220386	3.41911	0
KEGG_CALCIUM_SIGNALING_PATHWAY	0.222251	3.41528	0
FURUKAWA_DUSP6_TARGETS_PCI35_DN	0.359933	3.41512	0
CUI_TCF21_TARGETS_2_DN	0.105681	3.41449	0
PID_CXCR4_PATHWAY	0.292341	3.41137	0
REACTOME_PD1_SIGNALING	0.70691	3.40923	0
GRAESSMANN_APOPTOSIS_BY_DOXORUBICIN_UP	0.0933518	3.40766	0
FRIDMAN_SENESCENCE_UP	0.335163	3.40752	0
NUYTTEN_EZH2_TARGETS_DN	0.0966915	3.40727	0
ZHANG_ANTIVIRAL_RESPONSE_TO_RIBAVIRIN_UP	0.541446	3.40508	0
KHETCHOUMIAN_TRIM24_TARGETS_UP	0.43114	3.4028	0
KUNINGER_IGF1_VS_PDGFB_TARGETS_DN	0.435282	3.39881	0
MUELLER_METHYLATED_IN_GLIOBLASTOMA	0.450315	3.39729	0
BUYTAERT_PHOTODYNAMIC_THERAPY_STRESS_DN	0.120739	3.39724	0
ROY_WOUND_BLOOD_VESSEL_UP	0.4092	3.39694	0
KAAB_HEART_ATRIUM_VS_VENTRICLE_UP	0.188346	3.39508	0
WONG_EMBRYONIC_STEM_CELL_CORE	0.162737	3.39488	0
WHITFIELD_CELL_CYCLE_G2	0.227587	3.39206	0
ONDER_CDH1_SIGNALING_VIA_CTNNB1	0.330092	3.38939	0
PEDERSEN_METASTASIS_BY_ERBB2_ISOFORM_4	0.286904	3.38772	0
ZWANG_CLASS_3_TRANSIENTLY_INDUCED_BY_EGF	0.20102	3.38099	0
GRAHAM_CML_QUIESCENT_VS_NORMAL_QUIESCENT_UP	0.328826	3.37833	0
REICHERT_MITOSIS_LIN9_TARGETS	0.529823	3.37556	0
BOYLAN_MULTIPLE_MYELOMA_PCA1_UP	0.288633	3.37551	0
HUANG_FOXA2_TARGETS_DN	0.46797	3.37414	0
WONG_ENDMETRIUM_CANCER_DN	0.32591	3.37386	0
MIKKELSEN_ES_ICP_WITH_H3K4ME3_AND_H3K27ME3	0.255643	3.37263	0
SEKI_INFLAMMATORY_RESPONSE_LPS_UP	0.329316	3.36896	0
PUJANA_BRCA2_PCC_NETWORK	0.148755	3.36174	0
SMID_BREAST_CANCER_RELAPSE_IN_BRAIN_UP	0.458963	3.36166	0
ZHONG_SECRETOME_OF_LUNG_CANCER_AND_FIBROBLAST	0.255007	3.35979	0
KEGG_REGULATION_OF_ACTIN_CYTOSKELETON	0.197222	3.35777	0
HUMMERICH_SKIN_CANCER_PROGRESSION_UP	0.30847	3.35399	0
BIOCARTA_CTL_PATHWAY	0.781832	3.35181	0
ZHOU_CELL_CYCLE_GENES_IN_IR_RESPONSE_6HR	0.309573	3.35155	0
SCHRAETS_MLL_TARGETS_DN	0.505448	3.34771	0
PEDERSEN_TARGETS_OF_611CTF_ISOFORM_OF_ERBB2	0.342015	3.34767	0
KEGG_AUTOIMMUNE_THYROID_DISEASE	0.40198	3.34316	0
GAVIN_PDE3B_TARGETS	0.603401	3.34048	0
BROWNE_HCMV_INFECTION_2HR_DN	0.405926	3.34034	0
HINATA_NFKB_TARGETS_FIBROBLAST_UP	0.31479	3.33928	0
MIKKELSEN_IPS_ICP_WITH_H3K4ME3_AND_H327ME3	0.259154	3.33672	0
REN_BOUND_BY_E2F	0.357004	3.33658	0
MORI_LARGE_PRE_BII_LYMPHOCYTE_UP	0.315405	3.33531	0
GEORGANTAS_HSC_MARKERS	0.346913	3.33476	0
AMIT_EGF_RESPONSE_480_HELA	0.228904	3.33301	0
MULLIGHAN_MLL_SIGNATURE_2_UP	0.147899	3.33201	0
WILCOX_RESPONSE_TO_PROGESTERONE_DN	0.360568	3.32822	0
CHANDRAN_METASTASIS_DN	0.168957	3.32765	0
NEMETH_INFLAMMATORY_RESPONSE_LPS_UP	0.303431	3.32586	0
HUANG_GATA2_TARGETS_UP	0.235883	3.3199	0
RICKMAN_HEAD_AND_NECK_CANCER_A	0.288383	3.31795	0
BAELDE_DIABETIC_NEPHROPATHY_DN	0.139349	3.31731	0
MEISSNER_NPC_HCP_WITH_H3K4ME3_AND_H3K27ME3	0.241028	3.31512	0
KUMAMOTO_RESPONSE_TO_NUTLIN_3A_DN	0.86096	3.31486	0
PEDERSEN_METASTASIS_BY_ERBB2_ISOFORM_1	0.426393	3.3142	0
MIKKELSEN_MCV6_LCP_WITH_H3K4ME3	0.238395	3.31224	0
DER_IFN_ALPHA_RESPONSE_UP	0.328224	3.31082	0
WINTER_HYPOXIA_UP	0.297435	3.31066	0
DACOSTA_UV_RESPONSE_VIA_ERCC3_DN	0.101454	3.30596	0
VART_KSHV_INFECTION_ANGIOGENIC_MARKERS_DN	0.242987	3.30246	0
SERVITJA_LIVER_HNF1A_TARGETS_UP	0.252072	3.30055	0
BORCZUK_MALIGNANT_MESOTHELIOMA_UP	0.164814	3.30048	0
ENK_UV_RESPONSE_EPIDERMIS_UP	0.171567	3.30004	0
LABBE_WNT3A_TARGETS_UP	0.264159	3.29886	0
WINTER_HYPOXIA_DN	0.396522	3.29788	0
NAGASHIMA_NRG1_SIGNALING_UP	0.217193	3.29703	0
PARK_TRETINOIN_RESPONSE_AND_RARA_PLZF_FUSION	0.597863	3.29488	0
ROSS_AML_WITH_CBFB_MYH11_FUSION	0.390894	3.29361	0
BOWIE_RESPONSE_TO_EXTRACELLULAR_MATRIX	0.647676	3.2932	0
APPEL_IMATINIB_RESPONSE	0.491893	3.28938	0
EBAUER_TARGETS_OF_PAX3_FOXO1_FUSION_UP	0.202709	3.2866	0
LINDSTEDT_DENDRITIC_CELL_MATURATION_A	0.362584	3.28103	0
HOELZEL_NF1_TARGETS_DN	0.277285	3.28013	0
REACTOME_REGULATION_OF_INSULIN_LIKE_GROWTH_FACTOR_IGF_ACTIVITY_BY_INSULIN_LIKE_GROWTH_FACTOR_BINDING_PROTEINS_IGFBPS	0.674348	3.27991	0
KRIEG_HYPOXIA_NOT_VIA_KDM3A	0.109715	3.27489	0
HAN_SATB1_TARGETS_DN	0.141539	3.27486	0
PUJANA_ATM_PCC_NETWORK	0.0780409	3.27486	0
NABA_PROTEOGLYCANS	0.461687	3.27145	0
PID_TXA2PATHWAY	0.374181	3.27038	0
LIM_MAMMARY_LUMINAL_PROGENITOR_UP	0.354471	3.27004	0
REACTOME_CYTOKINE_SIGNALING_IN_IMMUNE_SYSTEM	0.174697	3.26724	0
HENDRICKS_SMARCA4_TARGETS_UP	0.376912	3.26325	0
EGUCHI_CELL_CYCLE_RB1_TARGETS	0.577124	3.26321	0
SU_THYMUS	0.625816	3.26225	0
WINNEPENNINCKX_MELANOMA_METASTASIS_UP	0.223701	3.26167	0
KEGG_ARRHYTHMOGENIC_RIGHT_VENTRICULAR_CARDIOMYOPATHY_ARVC	0.323737	3.25723	0
REACTOME_GENERATION_OF_SECOND_MESSENGER_MOLECULES	0.545527	3.25385	0
STEARMAN_TUMOR_FIELD_EFFECT_UP	0.46845	3.25209	0
MANALO_HYPOXIA_UP	0.201385	3.25044	0
LIANG_SILENCED_BY_METHYLATION_UP	0.502928	3.24858	0
CHIARADONNA_NEOPLASTIC_TRANSFORMATION_CDC25_UP	0.255368	3.24823	0
OSMAN_BLADDER_CANCER_UP	0.143411	3.24528	0
ONKEN_UVEAL_MELANOMA_UP	0.105212	3.24321	0
BIOCARTA_CTLA4_PATHWAY	0.634071	3.24262	0
TSAI_RESPONSE_TO_IONIZING_RADIATION	0.230912	3.24041	0
ZHU_CMV_ALL_DN	0.244033	3.23639	0
PATIL_LIVER_CANCER	0.107809	3.23604	0
SHEPARD_CRUSH_AND_BURN_MUTANT_DN	0.214514	3.23549	0
KIM_ALL_DISORDERS_OLIGODENDROCYTE_NUMBER_CORR_UP	0.106387	3.23503	0
CASTELLANO_NRAS_TARGETS_UP	0.353039	3.23478	0
GILDEA_METASTASIS	0.512872	3.23225	0
ENK_UV_RESPONSE_KERATINOCYTE_UP	0.121012	3.2309	0
BOWIE_RESPONSE_TO_TAMOXIFEN	0.647676	3.22574	0
BOSCO_INTERFERON_INDUCED_ANTIVIRAL_MODULE	0.316366	3.22532	0
BIOCARTA_TCRA_PATHWAY	0.802768	3.22413	0
LI_WILMS_TUMOR	0.529813	3.21608	0
KEGG_PRIMARY_IMMUNODEFICIENCY	0.455981	3.21227	0
MARKEY_RB1_ACUTE_LOF_UP	0.184856	3.21025	0
PID_INTEGRIN3_PATHWAY	0.416536	3.20795	0
HOWLIN_PUBERTAL_MAMMARY_GLAND	0.333473	3.20578	0
LINDSTEDT_DENDRITIC_CELL_MATURATION_D	0.339293	3.20265	0
JI_CARCINOGENESIS_BY_KRAS_AND_STK11_UP	0.754738	3.2004	0
KOKKINAKIS_METHIONINE_DEPRIVATION_48HR_UP	0.247956	3.19691	0
RAGHAVACHARI_PLATELET_SPECIFIC_GENES	0.331675	3.1969	0
KEGG_NEUROACTIVE_LIGAND_RECEPTOR_INTERACTION	0.167477	3.19489	0
BIOCARTA_NKT_PATHWAY	0.518672	3.19477	0
CROONQUIST_NRAS_SIGNALING_UP	0.461258	3.19472	0
LABBE_TGFB1_TARGETS_UP	0.274253	3.19068	0
BERENJENO_TRANSFORMED_BY_RHOA_DN	0.139617	3.18737	0
NAKAMURA_ADIPOGENESIS_EARLY_DN	0.442374	3.18713	0
CHIBA_RESPONSE_TO_TSA_UP	0.37664	3.18654	0
PID_PDGFRB_PATHWAY	0.239707	3.18405	0
FINAK_BREAST_CANCER_SDPP_SIGNATURE	0.551597	3.18361	0
HOLLERN_SOLID_NODULAR_BREAST_TUMOR_DN	0.48552	3.18233	0
NEWMAN_ERCC6_TARGETS_DN	0.432646	3.18093	0
REACTOME_CELL_CELL_COMMUNICATION	0.251789	3.17777	0
LIM_MAMMARY_LUMINAL_MATURE_DN	0.272624	3.17332	0
KEGG_PATHWAYS_IN_CANCER	0.154972	3.16864	0
BRUINS_UVC_RESPONSE_VIA_TP53_GROUP_A	0.0962599	3.16728	0
LEE_LIVER_CANCER_MYC_E2F1_UP	0.355894	3.16473	0
GAVIN_FOXP3_TARGETS_CLUSTER_P3	0.218044	3.16201	2.7735e-06
RUTELLA_RESPONSE_TO_HGF_DN	0.175914	3.16084	2.76855e-06
WESTON_VEGFA_TARGETS_3HR	0.31997	3.15518	2.76361e-06
DEMAGALHAES_AGING_UP	0.369534	3.15285	2.7587e-06
YAO_TEMPORAL_RESPONSE_TO_PROGESTERONE_CLUSTER_16	0.314535	3.14943	2.7538e-06
ZHU_CMV_24_HR_DN	0.286266	3.14691	2.74891e-06
SENESE_HDAC2_TARGETS_DN	0.249258	3.14468	2.74405e-06
VALK_AML_CLUSTER_5	0.476468	3.14417	2.7392e-06
NIELSEN_GIST_AND_SYNOVIAL_SARCOMA_DN	0.595324	3.14044	5.465e-06
PID_IL8_CXCR2_PATHWAY	0.462894	3.14015	5.45538e-06
CROMER_TUMORIGENESIS_DN	0.371525	3.13977	5.44579e-06
REACTOME_SMOOTH_MUSCLE_CONTRACTION	0.540848	3.13807	5.43624e-06
CHIARADONNA_NEOPLASTIC_TRANSFORMATION_CDC25_DN	0.222402	3.13119	5.42672e-06
IZADPANAH_STEM_CELL_ADIPOSE_VS_BONE_DN	0.266315	3.12743	5.41723e-06
KAMIKUBO_MYELOID_CEBPA_NETWORK	0.491508	3.12554	5.40778e-06
BURTON_ADIPOGENESIS_PEAK_AT_24HR	0.407304	3.12299	5.39836e-06
KIM_BIPOLAR_DISORDER_OLIGODENDROCYTE_DENSITY_CORR_DN	0.28946	3.11996	5.38897e-06
SMITH_TERT_TARGETS_DN	0.285276	3.11946	5.37961e-06
SMID_BREAST_CANCER_LUMINAL_A_DN	0.617229	3.11752	5.37029e-06
BURTON_ADIPOGENESIS_7	0.370547	3.1148	5.361e-06
ZHENG_BOUND_BY_FOXP3	0.123361	3.11465	5.35174e-06
LIU_CDX2_TARGETS_UP	0.441906	3.11445	5.34251e-06
MARTENS_BOUND_BY_PML_RARA_FUSION	0.130398	3.11185	7.96342e-06
KEGG_COMPLEMENT_AND_COAGULATION_CASCADES	0.311274	3.11039	7.94974e-06
YAGI_AML_FAB_MARKERS	0.194627	3.10881	7.9361e-06
PID_IL12_2PATHWAY	0.334015	3.10101	7.92251e-06
MOREAUX_MULTIPLE_MYELOMA_BY_TACI_UP	0.137138	3.0995	7.90897e-06
GRANDVAUX_IRF3_TARGETS_UP	0.670674	3.09914	7.89547e-06
WANG_SMARCE1_TARGETS_DN	0.143691	3.09891	7.88202e-06
BENNETT_SYSTEMIC_LUPUS_ERYTHEMATOSUS	0.465568	3.09864	7.86862e-06
RICKMAN_HEAD_AND_NECK_CANCER_D	0.469376	3.09651	7.85526e-06
BRUINS_UVC_RESPONSE_LATE	0.0849887	3.09527	7.84194e-06
FRIDMAN_IMMORTALIZATION_DN	0.447376	3.0949	7.82868e-06
LY_AGING_MIDDLE_DN	0.650532	3.09386	7.81545e-06
KOYAMA_SEMA3B_TARGETS_UP	0.165667	3.09207	7.80227e-06
COWLING_MYCN_TARGETS	0.402355	3.08974	7.78914e-06
SANA_TNF_SIGNALING_DN	0.283529	3.0896	7.77604e-06
BORLAK_LIVER_CANCER_EGF_UP	0.353057	3.08922	7.763e-06
BOYAULT_LIVER_CANCER_SUBCLASS_G5_DN	0.502803	3.08877	7.74999e-06
FUJII_YBX1_TARGETS_DN	0.190385	3.08656	7.73703e-06
LOPEZ_MESOTELIOMA_SURVIVAL_TIME_UP	0.704369	3.08098	7.72412e-06
BERENJENO_TRANSFORMED_BY_RHOA_FOREVER_DN	0.459335	3.07933	7.71124e-06
KEEN_RESPONSE_TO_ROSIGLITAZONE_DN	0.254008	3.07833	7.69841e-06
KANG_IMMORTALIZED_BY_TERT_DN	0.26043	3.07807	7.68563e-06
LABBE_TARGETS_OF_TGFB1_AND_WNT3A_DN	0.260206	3.07526	7.67288e-06
BOHN_PRIMARY_IMMUNODEFICIENCY_SYNDROM_DN	0.431353	3.07113	7.66018e-06
NAGASHIMA_EGF_SIGNALING_UP	0.33725	3.06915	7.64752e-06
VECCHI_GASTRIC_CANCER_ADVANCED_VS_EARLY_DN	0.23327	3.06888	7.6349e-06
PASQUALUCCI_LYMPHOMA_BY_GC_STAGE_DN	0.21034	3.06678	7.62232e-06
ZHU_CMV_8_HR_UP	0.383355	3.06661	7.60978e-06
HAN_SATB1_TARGETS_UP	0.137653	3.0654	7.59729e-06
REACTOME_INTERFERON_ALPHA_BETA_SIGNALING	0.329683	3.06352	7.58483e-06
PID_INTEGRIN_CS_PATHWAY	0.50891	3.06296	7.57242e-06
REACTOME_O_LINKED_GLYCOSYLATION_OF_MUCINS	0.364342	3.06261	7.56004e-06
REACTOME_INTERFERON_SIGNALING	0.211162	3.05721	7.54771e-06
NIELSEN_SYNOVIAL_SARCOMA_DN	0.578291	3.05579	7.53542e-06
PEREZ_TP53_AND_TP63_TARGETS	0.190201	3.05533	7.52317e-06
HINATA_NFKB_TARGETS_KERATINOCYTE_DN	0.537968	3.05507	7.51095e-06
GRAHAM_NORMAL_QUIESCENT_VS_NORMAL_DIVIDING_UP	0.325384	3.05455	7.49878e-06
CUI_TCF21_TARGETS_2_UP	0.130982	3.04338	7.48665e-06
SMID_BREAST_CANCER_RELAPSE_IN_LUNG_UP	0.568683	3.04289	7.47455e-06
RODRIGUES_NTN1_TARGETS_DN	0.20918	3.03915	7.46249e-06
SCHLOSSER_SERUM_RESPONSE_DN	0.102714	3.03844	7.45048e-06
LI_WILMS_TUMOR_VS_FETAL_KIDNEY_1_DN	0.203492	3.03706	7.4385e-06
PID_AMB2_NEUTROPHILS_PATHWAY	0.388549	3.03565	7.42656e-06
REACTOME_AMYLOIDS	0.364535	3.03532	7.41466e-06
PLASARI_NFIC_TARGETS_BASAL_UP	0.496463	3.03049	7.4028e-06
ONO_FOXP3_TARGETS_DN	0.404927	3.02837	7.39097e-06
OSADA_ASCL1_TARGETS_DN	0.530118	3.02836	7.37918e-06
NIELSEN_LEIOMYOSARCOMA_UP	0.638112	3.02421	7.36743e-06
WANG_BARRETTS_ESOPHAGUS_UP	0.358238	3.02254	7.35572e-06
RICKMAN_TUMOR_DIFFERENTIATED_WELL_VS_MODERATELY_DN	0.25102	3.0199	7.34404e-06
PETRETTO_CARDIAC_HYPERTROPHY	0.437828	3.0176	7.3324e-06
VERRECCHIA_RESPONSE_TO_TGFB1_C2	0.508638	3.0166	7.3208e-06
NIELSEN_MALIGNAT_FIBROUS_HISTIOCYTOMA_UP	0.590537	3.01365	7.30924e-06
HAHTOLA_MYCOSIS_FUNGOIDES_CD4_UP	0.333598	3.01098	7.29771e-06
WESTON_VEGFA_TARGETS_12HR	0.433426	3.00992	7.28622e-06
CROMER_METASTASIS_DN	0.283942	3.00856	7.27476e-06
REACTOME_NEURONAL_SYSTEM	0.156634	3.00804	7.26334e-06
KIM_BIPOLAR_DISORDER_OLIGODENDROCYTE_DENSITY_CORR_UP	0.105004	3.00783	7.25195e-06
COLDREN_GEFITINIB_RESISTANCE_DN	0.179754	3.00461	7.24061e-06
CHEMNITZ_RESPONSE_TO_PROSTAGLANDIN_E2_UP	0.223638	2.99832	7.22929e-06
ZHAN_MULTIPLE_MYELOMA_DN	0.404412	2.99464	7.21801e-06
SCHAEFFER_PROSTATE_DEVELOPMENT_12HR_DN	0.340593	2.99461	7.20677e-06
DER_IFN_GAMMA_RESPONSE_UP	0.303143	2.99442	7.19556e-06
ROSS_ACUTE_MYELOID_LEUKEMIA_CBF	0.277842	2.98996	7.18439e-06
SHETH_LIVER_CANCER_VS_TXNIP_LOSS_PAM3	0.310048	2.98764	7.17325e-06
KEGG_ASTHMA	0.460168	2.98211	7.16215e-06
SCHLESINGER_METHYLATED_DE_NOVO_IN_CANCER	0.282434	2.98051	7.15108e-06
BIOCARTA_BLYMPHOCYTE_PATHWAY	0.75615	2.97837	7.14004e-06
WONG_ENDMETRIUM_CANCER_UP	0.507804	2.97701	7.12904e-06
BIOCARTA_ASBCELL_PATHWAY	0.698023	2.97652	7.11807e-06
KUROZUMI_RESPONSE_TO_ONCOCYTIC_VIRUS_AND_CYCLIC_RGD	0.543423	2.9728	7.10714e-06
JACKSON_DNMT1_TARGETS_UP	0.295931	2.97274	7.09624e-06
LINDGREN_BLADDER_CANCER_HIGH_RECURRENCE	0.369151	2.97158	7.08537e-06
SHETH_LIVER_CANCER_VS_TXNIP_LOSS_PAM1	0.176437	2.97092	7.07454e-06
TRAYNOR_RETT_SYNDROM_UP	0.403833	2.97033	7.06374e-06
MARTINEZ_RB1_AND_TP53_TARGETS_UP	0.107022	2.96489	7.05297e-06
REACTOME_DEVELOPMENTAL_BIOLOGY	0.134357	2.96051	7.04223e-06
PROVENZANI_METASTASIS_DN	0.217011	2.95521	1.17686e-05
KEGG_ANTIGEN_PROCESSING_AND_PRESENTATION	0.276879	2.95483	1.17507e-05
NAKAJIMA_MAST_CELL	0.381298	2.952	1.17329e-05
KIM_WT1_TARGETS_8HR_UP	0.20466	2.95176	1.17152e-05
REACTOME_OPIOID_SIGNALLING	0.289033	2.94711	1.16975e-05
DELPUECH_FOXO3_TARGETS_UP	0.300018	2.94514	1.87218e-05
PID_INTEGRIN5_PATHWAY	0.57985	2.94312	1.86936e-05
BIOCARTA_RHO_PATHWAY	0.435082	2.94204	1.86655e-05
FOSTER_TOLERANT_MACROPHAGE_UP	0.208992	2.94009	1.86374e-05
BOYAULT_LIVER_CANCER_SUBCLASS_G3_UP	0.185881	2.93843	2.32237e-05
PID_S1P_S1P3_PATHWAY	0.451477	2.93804	2.31889e-05
SWEET_KRAS_TARGETS_UP	0.280423	2.9361	2.31542e-05
ZHANG_INTERFERON_RESPONSE	0.506787	2.93539	2.31197e-05
ROSS_AML_WITH_AML1_ETO_FUSION	0.299369	2.93497	2.30852e-05
LEE_DIFFERENTIATING_T_LYMPHOCYTE	0.184192	2.93214	2.30509e-05
PID_AVB3_INTEGRIN_PATHWAY	0.283677	2.93116	2.30166e-05
HOSHIDA_LIVER_CANCER_SURVIVAL_UP	0.288801	2.92653	2.29825e-05
RASHI_RESPONSE_TO_IONIZING_RADIATION_6	0.285308	2.92605	2.29484e-05
YU_MYC_TARGETS_DN	0.349214	2.92512	2.29145e-05
BOSCO_EPITHELIAL_DIFFERENTIATION_MODULE	0.315957	2.92111	2.28806e-05
WIERENGA_STAT5A_TARGETS_UP	0.178889	2.91934	2.28469e-05
PID_TCR_PATHWAY	0.311804	2.91899	2.28132e-05
MARSON_BOUND_BY_FOXP3_STIMULATED	0.0817826	2.91727	2.27797e-05
TURASHVILI_BREAST_DUCTAL_CARCINOMA_VS_LOBULAR_NORMAL_UP	0.293086	2.91695	2.27462e-05
FERRANDO_T_ALL_WITH_MLL_ENL_FUSION_UP	0.267117	2.91387	2.27129e-05
NATSUME_RESPONSE_TO_INTERFERON_BETA_DN	0.340289	2.91122	2.49589e-05
HANN_RESISTANCE_TO_BCL2_INHIBITOR_UP	0.407208	2.91097	2.49224e-05
JEON_SMAD6_TARGETS_UP	0.500863	2.90876	2.71619e-05
BRUNO_HEMATOPOIESIS	0.308783	2.90829	2.71223e-05
LABBE_WNT3A_TARGETS_DN	0.256648	2.9079	2.70828e-05
MIKKELSEN_ES_LCP_WITH_H3K4ME3	0.220008	2.90749	3.16178e-05
DORSEY_GAB2_TARGETS	0.43818	2.90744	3.15719e-05
HORIUCHI_WTAP_TARGETS_UP	0.14968	2.90583	3.15262e-05
PID_THROMBIN_PAR1_PATHWAY	0.373331	2.90273	3.14806e-05
PID_SYNDECAN_4_PATHWAY	0.441482	2.90181	3.14351e-05
WILCOX_RESPONSE_TO_PROGESTERONE_UP	0.208486	2.90074	3.13897e-05
MCBRYAN_PUBERTAL_BREAST_6_7WK_DN	0.283429	2.89419	3.57614e-05
REACTOME_NCAM1_INTERACTIONS	0.39178	2.89415	3.57099e-05
PID_NFAT_TFPATHWAY	0.363258	2.89383	3.56586e-05
BERTUCCI_MEDULLARY_VS_DUCTAL_BREAST_CANCER_DN	0.200773	2.89159	4.22218e-05
MARTINEZ_TP53_TARGETS_UP	0.103842	2.89052	4.21613e-05
NIELSEN_GIST_VS_SYNOVIAL_SARCOMA_UP	0.577441	2.88777	4.2101e-05
PID_INTEGRIN_A4B1_PATHWAY	0.43315	2.88688	4.20409e-05
KEGG_ARACHIDONIC_ACID_METABOLISM	0.329734	2.88614	4.19809e-05
SHETH_LIVER_CANCER_VS_TXNIP_LOSS_PAM2	0.205887	2.88309	4.19211e-05
HELLER_HDAC_TARGETS_DN	0.150629	2.87786	4.18615e-05
LABBE_TGFB1_TARGETS_DN	0.24293	2.87682	4.1802e-05
LIU_SMARCA4_TARGETS	0.327813	2.87568	4.17427e-05
AMUNDSON_POOR_SURVIVAL_AFTER_GAMMA_RADIATION_8G	0.25578	2.87552	4.16836e-05
GRYDER_PAX3FOXO1_ENHANCERS_KO_DOWN	0.121685	2.87358	4.37783e-05
NADERI_BREAST_CANCER_PROGNOSIS_UP	0.35258	2.86984	4.58835e-05
WANG_BARRETTS_ESOPHAGUS_AND_ESOPHAGUS_CANCER_DN	0.415205	2.86723	4.58188e-05
LEE_LIVER_CANCER_CIPROFIBRATE_UP	0.313568	2.86185	5.01097e-05
KAYO_CALORIE_RESTRICTION_MUSCLE_UP	0.247535	2.85374	5.44135e-05
NOJIMA_SFRP2_TARGETS_DN	0.484072	2.85056	5.4337e-05
MORI_IMMATURE_B_LYMPHOCYTE_UP	0.343349	2.84959	5.42608e-05
PARK_APL_PATHOGENESIS_DN	0.350371	2.84741	5.41848e-05
DUNNE_TARGETS_OF_AML1_MTG8_FUSION_UP	0.346506	2.84616	5.41091e-05
FONTAINE_PAPILLARY_THYROID_CARCINOMA_UP	0.319125	2.84574	5.40335e-05
SAFFORD_T_LYMPHOCYTE_ANERGY	0.263869	2.84464	5.61464e-05
HAHTOLA_CTCL_PATHOGENESIS	0.604324	2.8444	5.82255e-05
ZHONG_RESPONSE_TO_AZACITIDINE_AND_TSA_UP	0.191459	2.84411	5.81446e-05
AMIT_SERUM_RESPONSE_240_MCF10A	0.323647	2.84262	5.80638e-05
HELLER_HDAC_TARGETS_SILENCED_BY_METHYLATION_DN	0.150686	2.8424	5.79833e-05
YE_METASTATIC_LIVER_CANCER	0.463496	2.8385	5.7903e-05
ONO_AML1_TARGETS_DN	0.387192	2.83756	5.78229e-05
NIKOLSKY_BREAST_CANCER_7P15_AMPLICON	0.696155	2.83534	5.7743e-05
LANDIS_ERBB2_BREAST_TUMORS_324_UP	0.201264	2.83487	5.76634e-05
GENTILE_UV_HIGH_DOSE_DN	0.141165	2.83402	5.75839e-05
KLEIN_PRIMARY_EFFUSION_LYMPHOMA_DN	0.322328	2.83253	5.75047e-05
YAO_TEMPORAL_RESPONSE_TO_PROGESTERONE_CLUSTER_12	0.276173	2.8325	5.74257e-05
VILIMAS_NOTCH1_TARGETS_DN	0.522997	2.8317	5.94718e-05
CAIRO_LIVER_DEVELOPMENT_UP	0.19097	2.83101	5.93903e-05
BIOCARTA_GRANULOCYTES_PATHWAY	0.676338	2.82949	5.9309e-05
WANG_RESPONSE_TO_BEXAROTENE_DN	0.441948	2.82848	5.9228e-05
HOFFMANN_PRE_BI_TO_LARGE_PRE_BII_LYMPHOCYTE_DN	0.286022	2.82834	5.91472e-05
DASU_IL6_SIGNALING_UP	0.319036	2.82268	6.11664e-05
WELCSH_BRCA1_TARGETS_UP	0.171714	2.8201	6.31887e-05
ELVIDGE_HYPOXIA_UP	0.186358	2.81942	6.52181e-05
REACTOME_CD28_DEPENDENT_VAV1_PATHWAY	0.697259	2.81472	6.51296e-05
REACTOME_MITOTIC_G1_G1_S_PHASES	0.209931	2.80881	7.13362e-05
RUTELLA_RESPONSE_TO_HGF_VS_CSF2RB_AND_IL4_DN	0.160383	2.80782	7.12397e-05
RAMALHO_STEMNESS_DN	0.286445	2.80656	7.32775e-05
LEE_AGING_CEREBELLUM_UP	0.267631	2.80403	7.74399e-05
ZHU_CMV_ALL_UP	0.220727	2.8015	7.73356e-05
FOURNIER_ACINAR_DEVELOPMENT_LATE_DN	0.504214	2.7953	8.56072e-05
FLECHNER_BIOPSY_KIDNEY_TRANSPLANT_OK_VS_DONOR_UP	0.106837	2.7935	8.75451e-05
SU_PLACENTA	0.455323	2.79346	8.74275e-05
SCIAN_CELL_CYCLE_TARGETS_OF_TP53_AND_TP73_DN	0.507845	2.79224	8.73104e-05
MARTORIATI_MDM4_TARGETS_NEUROEPITHELIUM_DN	0.195773	2.79175	8.71935e-05
WANG_METHYLATED_IN_BREAST_CANCER	0.39522	2.79098	8.70769e-05
HIRSCH_CELLULAR_TRANSFORMATION_SIGNATURE_UP	0.159728	2.78787	8.69606e-05
LEIN_PONS_MARKERS	0.250855	2.78714	8.8928e-05
GAVIN_FOXP3_TARGETS_CLUSTER_P7	0.259238	2.78685	8.88096e-05
SESTO_RESPONSE_TO_UV_C5	0.343251	2.7856	8.86915e-05
LI_LUNG_CANCER	0.362775	2.78443	8.85737e-05
TARTE_PLASMA_CELL_VS_B_LYMPHOCYTE_DN	0.380422	2.77998	9.05219e-05
RICKMAN_HEAD_AND_NECK_CANCER_E	0.257375	2.77757	9.46281e-05
LINDGREN_BLADDER_CANCER_CLUSTER_3_UP	0.137027	2.77731	9.4503e-05
VERHAAK_GLIOBLASTOMA_PRONEURAL	0.181308	2.77436	9.85427e-05
VERRECCHIA_DELAYED_RESPONSE_TO_TGFB1	0.371451	2.77242	9.84127e-05
LEE_BMP2_TARGETS_DN	0.0833403	2.76993	0.000104421
ALCALAY_AML_BY_NPM1_LOCALIZATION_UP	0.204846	2.76953	0.000104283
LEE_TARGETS_OF_PTCH1_AND_SUFU_UP	0.338325	2.76877	0.000104146
REACTOME_TRANSMISSION_ACROSS_CHEMICAL_SYNAPSES	0.17901	2.76856	0.000106063
ACEVEDO_LIVER_CANCER_UP	0.0808492	2.76625	0.000105924
LI_WILMS_TUMOR_VS_FETAL_KIDNEY_2_DN	0.331894	2.76588	0.000107796
GARY_CD5_TARGETS_DN	0.114674	2.76447	0.000107655
HOLLMANN_APOPTOSIS_VIA_CD40_UP	0.172028	2.7638	0.000107515
HAMAI_APOPTOSIS_VIA_TRAIL_DN	0.178936	2.76257	0.000107375
RASHI_RESPONSE_TO_IONIZING_RADIATION_2	0.20975	2.76196	0.000107235
SASSON_RESPONSE_TO_FORSKOLIN_DN	0.254857	2.76082	0.000107095
MARSON_FOXP3_TARGETS_UP	0.296204	2.75822	0.000108977
CHARAFE_BREAST_CANCER_BASAL_VS_MESENCHYMAL_DN	0.325714	2.75331	0.000114919
BIOCARTA_INFLAM_PATHWAY	0.443026	2.75322	0.00011477
KAYO_AGING_MUSCLE_UP	0.152749	2.7523	0.000114621
GUENTHER_GROWTH_SPHERICAL_VS_ADHERENT_DN	0.459183	2.7518	0.000114473
TAVOR_CEBPA_TARGETS_UP	0.331515	2.74971	0.000116302
DER_IFN_BETA_RESPONSE_UP	0.232006	2.74868	0.000116152
SUZUKI_RESPONSE_TO_TSA_AND_DECITABINE_1A	0.507998	2.74816	0.000116002
VALK_AML_WITH_CEBPA	0.387445	2.74814	0.000115853
FUJII_YBX1_TARGETS_UP	0.370295	2.74682	0.000119699
WEIGEL_OXIDATIVE_STRESS_BY_TBH_AND_H2O2	0.380473	2.74679	0.000119545
BECKER_TAMOXIFEN_RESISTANCE_UP	0.327319	2.74595	0.000119392
LEE_LIVER_CANCER_MYC_TGFA_UP	0.297257	2.74318	0.00012322
STREICHER_LSM1_TARGETS_DN	0.519875	2.74149	0.000125036
KEGG_LONG_TERM_DEPRESSION	0.28226	2.74013	0.000126873
DOANE_BREAST_CANCER_ESR1_DN	0.347829	2.73821	0.000130626
HAHTOLA_SEZARY_SYNDROM_UP	0.243391	2.7361	0.000134417
FURUKAWA_DUSP6_TARGETS_PCI35_UP	0.280647	2.73562	0.000134247
HENDRICKS_SMARCA4_TARGETS_DN	0.332372	2.73339	0.000134076
KEGG_PATHOGENIC_ESCHERICHIA_COLI_INFECTION	0.313667	2.73182	0.000135824
KOINUMA_COLON_CANCER_MSI_UP	0.552636	2.73131	0.000135652
LIN_APC_TARGETS	0.269629	2.73038	0.000135481
MAHADEVAN_GIST_MORPHOLOGICAL_SWITCH	0.593305	2.72998	0.00013531
LY_AGING_OLD_DN	0.307924	2.72688	0.00014677
REACTOME_SEMA4D_IN_SEMAPHORIN_SIGNALING	0.421334	2.72649	0.000146585
PLASARI_TGFB1_SIGNALING_VIA_NFIC_10HR_UP	0.330956	2.72605	0.0001464
REACTOME_SIGNAL_AMPLIFICATION	0.410466	2.72441	0.000148256
NAKAMURA_ADIPOGENESIS_LATE_DN	0.380351	2.71959	0.000153954
WEST_ADRENOCORTICAL_TUMOR_MARKERS_UP	0.497559	2.71686	0.00015959
REACTOME_COMMON_PATHWAY	0.588002	2.71391	0.00015939
FINETTI_BREAST_CANCER_KINOME_RED	0.564603	2.71124	0.000163049
ALFANO_MYC_TARGETS	0.157103	2.71111	0.000162846
RHEIN_ALL_GLUCOCORTICOID_THERAPY_DN	0.127213	2.70948	0.000162643
PID_IL23_PATHWAY	0.378592	2.70775	0.00016825
ZHOU_INFLAMMATORY_RESPONSE_LIVE_UP	0.113593	2.70661	0.000171943
REACTOME_ANTIGEN_ACTIVATES_B_CELL_RECEPTOR_LEADING_TO_GENERATION_OF_SECOND_MESSENGERS	0.424065	2.7043	0.000175582
KLEIN_TARGETS_OF_BCR_ABL1_FUSION	0.330861	2.70324	0.000175364
REACTOME_NEUROTRANSMITTER_RECEPTOR_BINDING_AND_DOWNSTREAM_TRANSMISSION_IN_THE_POSTSYNAPTIC_CELL	0.199166	2.70228	0.000175147
AMIT_SERUM_RESPONSE_60_MCF10A	0.311667	2.70123	0.000176832
WANG_CISPLATIN_RESPONSE_AND_XPC_UP	0.166032	2.69985	0.000176614
SUNG_METASTASIS_STROMA_UP	0.226018	2.69919	0.000176396
MORI_MATURE_B_LYMPHOCYTE_UP	0.247998	2.69752	0.000176178
SEMENZA_HIF1_TARGETS	0.386848	2.69659	0.00017789
VANHARANTA_UTERINE_FIBROID_UP	0.339266	2.69595	0.000179607
SENESE_HDAC1_TARGETS_DN	0.150222	2.69504	0.000185075
STEGER_ADIPOGENESIS_DN	0.457938	2.69041	0.000190604
REACTOME_KERATAN_SULFATE_KERATIN_METABOLISM	0.424904	2.69011	0.00019037
REACTOME_MUSCLE_CONTRACTION	0.335738	2.68504	0.000193959
GAUSSMANN_MLL_AF4_FUSION_TARGETS_E_UP	0.24401	2.68372	0.000199353
HOSHIDA_LIVER_CANCER_LATE_RECURRENCE_UP	0.312394	2.68301	0.000199109
BIOCARTA_CDC42RAC_PATHWAY	0.562047	2.68132	0.000202686
MASSARWEH_TAMOXIFEN_RESISTANCE_UP	0.101891	2.68037	0.000202439
BIOCARTA_MPR_PATHWAY	0.383199	2.68011	0.000202192
FINETTI_BREAST_CANCER_KINOME_GREEN	0.561102	2.67898	0.000201947
SENESE_HDAC2_TARGETS_UP	0.220544	2.67814	0.000203608
PHONG_TNF_RESPONSE_VIA_P38_PARTIAL	0.183878	2.67759	0.000203361
LEI_HOXC8_TARGETS_DN	0.552623	2.67721	0.000203115
LU_AGING_BRAIN_UP	0.144537	2.67679	0.000202869
TIAN_TNF_SIGNALING_VIA_NFKB	0.436593	2.67607	0.000202624
MARSON_BOUND_BY_FOXP3_UNSTIMULATED	0.0703809	2.67524	0.000204286
AMUNDSON_GENOTOXIC_SIGNATURE	0.22702	2.67524	0.00020404
DEBOSSCHER_NFKB_TARGETS_REPRESSED_BY_GLUCOCORTICOIDS	0.490533	2.67332	0.000207443
MARTINEZ_RB1_TARGETS_UP	0.0924998	2.67162	0.000210837
KANG_IMMORTALIZED_BY_TERT_UP	0.247271	2.66782	0.000216222
JIANG_TIP30_TARGETS_UP	0.338999	2.66759	0.000215963
PID_DELTA_NP63_PATHWAY	0.333184	2.66667	0.000215704
LIAN_NEUTROPHIL_GRANULE_CONSTITUENTS	0.452953	2.6662	0.000217274
LOPEZ_MBD_TARGETS	0.0778495	2.66531	0.000217014
KARAKAS_TGFB1_SIGNALING	0.517663	2.66389	0.000220436
MARZEC_IL2_SIGNALING_UP	0.220516	2.66037	0.000220173
REACTOME_DNA_REPLICATION	0.167422	2.65996	0.000219911
KOHOUTEK_CCNT1_TARGETS	0.323726	2.6598	0.000219649
HSIAO_LIVER_SPECIFIC_GENES	0.14403	2.65932	0.000219388
JOHANSSON_GLIOMAGENESIS_BY_PDGFB_UP	0.3025	2.65863	0.000219128
DOANE_RESPONSE_TO_ANDROGEN_DN	0.153511	2.65795	0.000220748
BIOCARTA_NO2IL12_PATHWAY	0.551614	2.65659	0.000229691
TAKEDA_TARGETS_OF_NUP98_HOXA9_FUSION_16D_DN	0.208572	2.6564	0.00022942
TORCHIA_TARGETS_OF_EWSR1_FLI1_FUSION_DN	0.134224	2.65466	0.000230993
HERNANDEZ_MITOTIC_ARREST_BY_DOCETAXEL_2_UP	0.282144	2.65386	0.000230721
LU_IL4_SIGNALING	0.242496	2.65183	0.000234145
PID_FRA_PATHWAY	0.364049	2.65154	0.000237488
FERRANDO_HOX11_NEIGHBORS	0.461407	2.6467	0.000257404
ZHANG_TLX_TARGETS_60HR_DN	0.139429	2.64635	0.000257102
MOROSETTI_FACIOSCAPULOHUMERAL_MUSCULAR_DISTROPHY_UP	0.503811	2.64546	0.00026046
REACTOME_GAP_JUNCTION_ASSEMBLY	0.535742	2.64373	0.000261989
DAZARD_RESPONSE_TO_UV_NHEK_UP	0.149882	2.64351	0.000261683
REACTOME_INFLAMMASOMES	0.563811	2.64347	0.000261377
MARSHALL_VIRAL_INFECTION_RESPONSE_DN	0.417633	2.64296	0.000261072
GAUSSMANN_MLL_AF4_FUSION_TARGETS_G_UP	0.152458	2.6416	0.000260768
RUIZ_TNC_TARGETS_UP	0.191173	2.63986	0.000264108
PARK_TRETINOIN_RESPONSE	0.614016	2.63665	0.000272778
ALONSO_METASTASIS_EMT_UP	0.370161	2.63612	0.000276059
YAO_TEMPORAL_RESPONSE_TO_PROGESTERONE_CLUSTER_9	0.27172	2.63458	0.000279286
MEISSNER_BRAIN_HCP_WITH_H3K4ME2_AND_H3K27ME3	0.298851	2.63421	0.000278963
HELLER_HDAC_TARGETS_UP	0.135036	2.6334	0.00027864
PID_INTEGRIN_A9B1_PATHWAY	0.447603	2.63337	0.000278318
CHANG_IMMORTALIZED_BY_HPV31_DN	0.286956	2.63315	0.000277996
CHEBOTAEV_GR_TARGETS_DN	0.208752	2.62498	0.000302737
TORCHIA_TARGETS_OF_EWSR1_FLI1_FUSION_UP	0.144247	2.62396	0.000304202
BIOCARTA_TH1TH2_PATHWAY	0.499144	2.62252	0.000307425
WHITFIELD_CELL_CYCLE_G2_M	0.158788	2.62032	0.000314233
CAIRO_HEPATOBLASTOMA_CLASSES_DN	0.160428	2.62018	0.000313872
LEI_HOXC8_TARGETS_UP	0.66375	2.61874	0.000313512
TORCHIA_TARGETS_OF_EWSR1_FLI1_FUSION_TOP20_UP	0.501694	2.61854	0.000313153
REACTOME_THROMBOXANE_SIGNALLING_THROUGH_TP_RECEPTOR	0.441184	2.61847	0.000312795
LIEN_BREAST_CARCINOMA_METAPLASTIC	0.36953	2.61567	0.000317814
THEILGAARD_NEUTROPHIL_AT_SKIN_WOUND_DN	0.146872	2.61495	0.000319198
ELVIDGE_HIF1A_AND_HIF2A_TARGETS_DN	0.221714	2.61293	0.000320609
DASU_IL6_SIGNALING_SCAR_UP	0.404093	2.611	0.000321993
ELVIDGE_HIF1A_TARGETS_DN	0.237055	2.61019	0.000323415
AMUNDSON_POOR_SURVIVAL_AFTER_GAMMA_RADIATION_2G	0.175297	2.6099	0.000324802
LEE_LIVER_CANCER_SURVIVAL_DN	0.173628	2.60924	0.000324434
CHIARADONNA_NEOPLASTIC_TRANSFORMATION_KRAS_DN	0.191153	2.60913	0.000324066
GOTZMANN_EPITHELIAL_TO_MESENCHYMAL_TRANSITION_DN	0.157772	2.6091	0.000323699
FARMER_BREAST_CANCER_APOCRINE_VS_BASAL	0.1297	2.60841	0.00032681
MIKKELSEN_IPS_ICP_WITH_H3K27ME3	0.308603	2.60672	0.000331667
REACTOME_G1_S_TRANSITION	0.217048	2.6067	0.000331293
PID_PI3KCI_PATHWAY	0.316051	2.60247	0.000343192
RICKMAN_HEAD_AND_NECK_CANCER_B	0.324265	2.60121	0.000344536
REACTOME_CELL_CYCLE_MITOTIC	0.128471	2.60044	0.000347679
HOLLMANN_APOPTOSIS_VIA_CD40_DN	0.141683	2.59989	0.000349041
BENPORATH_NANOG_TARGETS	0.0734109	2.59922	0.00034865
KEGG_O_GLYCAN_BIOSYNTHESIS	0.413027	2.59896	0.000348259
REACTOME_APOPTOSIS	0.18743	2.59853	0.000347869
LIU_TARGETS_OF_VMYB_VS_CMYB_DN	0.339435	2.59732	0.000354413
REACTOME_NCAM_SIGNALING_FOR_NEURITE_OUT_GROWTH	0.274353	2.59715	0.000354017
HAHTOLA_SEZARY_SYNDROM_DN	0.366382	2.59617	0.000353622
IVANOVA_HEMATOPOIESIS_LATE_PROGENITOR	0.100546	2.59566	0.000353228
KAUFFMANN_MELANOMA_RELAPSE_UP	0.285312	2.59534	0.000356218
PUJANA_BRCA_CENTERED_NETWORK	0.206922	2.59527	0.000355822
SMID_BREAST_CANCER_ERBB2_UP	0.191778	2.5933	0.000360693
REACTOME_THE_ROLE_OF_NEF_IN_HIV1_REPLICATION_AND_DISEASE_PATHOGENESIS	0.424011	2.59219	0.000362062
OLSSON_E2F3_TARGETS_DN	0.327591	2.59184	0.000363363
CAIRO_LIVER_DEVELOPMENT_DN	0.153886	2.59143	0.000364658
BRUECKNER_TARGETS_OF_MIRLET7A3_UP	0.218156	2.59115	0.000364254
JOHNSTONE_PARVB_TARGETS_2_DN	0.125907	2.59056	0.000367255
KEGG_T_CELL_RECEPTOR_SIGNALING_PATHWAY	0.212878	2.58915	0.000370285
BIOCARTA_CSK_PATHWAY	0.45809	2.58827	0.000371586
BYSTRYKH_HEMATOPOIESIS_STEM_CELL_QTL_TRANS	0.0771173	2.58707	0.000371177
DOANE_BREAST_CANCER_CLASSES_DN	0.378456	2.58441	0.000374172
KEGG_FC_GAMMA_R_MEDIATED_PHAGOCYTOSIS	0.236674	2.58332	0.000375481
DURCHDEWALD_SKIN_CARCINOGENESIS_DN	0.140464	2.57904	0.000393855
REACTOME_CHONDROITIN_SULFATE_DERMATAN_SULFATE_METABOLISM	0.320614	2.57833	0.000393423
REACTOME_THROMBIN_SIGNALLING_THROUGH_PROTEINASE_ACTIVATED_RECEPTORS_PARS	0.384233	2.57175	0.000423621
GRAESSMANN_APOPTOSIS_BY_SERUM_DEPRIVATION_UP	0.0983301	2.57107	0.000423158
MOHANKUMAR_HOXA1_TARGETS_UP	0.11127	2.57095	0.000422695
REACTOME_SIGNALING_BY_ILS	0.211399	2.5704	0.000422234
ODONNELL_TARGETS_OF_MYC_AND_TFRC_UP	0.24888	2.57023	0.000421773
PID_CD8_TCR_PATHWAY	0.313628	2.57014	0.000421314
BASSO_HAIRY_CELL_LEUKEMIA_UP	0.24841	2.56958	0.000424305
REACTOME_G1_S_SPECIFIC_TRANSCRIPTION	0.525856	2.56843	0.000425537
MAHAJAN_RESPONSE_TO_IL1A_UP	0.249478	2.56711	0.000428465
BIOCARTA_IL17_PATHWAY	0.57333	2.56624	0.000429686
TING_SILENCED_BY_DICER	0.386722	2.56513	0.000435995
PUJANA_XPRSS_INT_NETWORK	0.178154	2.56461	0.000435523
REACTOME_CHONDROITIN_SULFATE_BIOSYNTHESIS	0.486312	2.56382	0.000436742
PAPASPYRIDONOS_UNSTABLE_ATEROSCLEROTIC_PLAQUE_UP	0.305085	2.55679	0.000449709
NIELSEN_LEIOMYOSARCOMA_CNN1_UP	0.497118	2.55628	0.000450925
CROONQUIST_NRAS_VS_STROMAL_STIMULATION_UP	0.350125	2.55583	0.000452138
GUTIERREZ_CHRONIC_LYMPHOCYTIC_LEUKEMIA_UP	0.618608	2.55563	0.000451651
ZWANG_CLASS_2_TRANSIENTLY_INDUCED_BY_EGF	0.320761	2.55543	0.000452823
CHAN_INTERFERON_PRODUCING_DENDRITIC_CELL	0.608603	2.55408	0.000452337
SERVITJA_LIVER_HNF1A_TARGETS_DN	0.175361	2.553	0.000456798
GAVIN_FOXP3_TARGETS_CLUSTER_P4	0.222019	2.55088	0.000461323
SESTO_RESPONSE_TO_UV_C0	0.210942	2.55051	0.000464199
REACTOME_KERATAN_SULFATE_DEGRADATION	0.631515	2.55049	0.000463703
REACTOME_METABOLISM_OF_CARBOHYDRATES	0.143645	2.5503	0.00046491
DACOSTA_UV_RESPONSE_VIA_ERCC3_COMMON_DN	0.103828	2.54904	0.000469416
PID_IL8_CXCR1_PATHWAY	0.419417	2.54775	0.000473941
ABDELMOHSEN_ELAVL4_TARGETS	0.535538	2.54772	0.000473437
PID_EPHB_FWD_PATHWAY	0.339385	2.54761	0.000472933
TSUNODA_CISPLATIN_RESISTANCE_DN	0.317221	2.54643	0.000477423
KEGG_DILATED_CARDIOMYOPATHY	0.231981	2.54536	0.000480238
REACTOME_CELL_CYCLE	0.113719	2.54392	0.000487954
BIOCARTA_CYTOKINE_PATHWAY	0.47859	2.54377	0.000489106
SASSON_RESPONSE_TO_GONADOTROPHINS_DN	0.242918	2.54227	0.000490248
NAKAJIMA_EOSINOPHIL	0.427892	2.53799	0.000501266
CHARAFE_BREAST_CANCER_BASAL_VS_MESENCHYMAL_UP	0.204513	2.53716	0.000505678
SCHAEFFER_PROSTATE_DEVELOPMENT_12HR_UP	0.208183	2.53698	0.000505145
ZHONG_SECRETOME_OF_LUNG_CANCER_AND_MACROPHAGE	0.24715	2.53675	0.000506231
REACTOME_KERATAN_SULFATE_BIOSYNTHESIS	0.426347	2.53643	0.000508937
LI_WILMS_TUMOR_VS_FETAL_KIDNEY_1_UP	0.164073	2.53631	0.000508402
PARENT_MTOR_SIGNALING_DN	0.327202	2.53501	0.000514354
WATANABE_ULCERATIVE_COLITIS_WITH_CANCER_DN	0.548998	2.53396	0.000517053
INGRAM_SHH_TARGETS_DN	0.280293	2.53039	0.000526274
ROY_WOUND_BLOOD_VESSEL_DN	0.461248	2.53023	0.000525723
SIMBULAN_PARP1_TARGETS_DN	0.503278	2.52802	0.000531617
MAHADEVAN_IMATINIB_RESISTANCE_UP	0.461663	2.52669	0.000531061
OXFORD_RALA_OR_RALB_TARGETS_UP	0.316322	2.52544	0.000536999
SPIELMAN_LYMPHOBLAST_EUROPEAN_VS_ASIAN_2FC_DN	0.473946	2.52531	0.00053644
GHO_ATF5_TARGETS_DN	0.512487	2.52507	0.000535881
RHEIN_ALL_GLUCOCORTICOID_THERAPY_UP	0.252311	2.52498	0.000535323
SHEDDEN_LUNG_CANCER_GOOD_SURVIVAL_A12	0.132089	2.52268	0.000542811
MARTINEZ_RESPONSE_TO_TRABECTEDIN_UP	0.258387	2.52006	0.000551873
BAUS_TFF2_TARGETS_UP	0.385392	2.51962	0.000552902
BIOCARTA_MONOCYTE_PATHWAY	0.649548	2.51932	0.000553951
GERHOLD_ADIPOGENESIS_DN	0.272768	2.51906	0.000555014
WINNEPENNINCKX_MELANOMA_METASTASIS_DN	0.341208	2.51846	0.000557625
PID_IL12_STAT4_PATHWAY	0.361026	2.51722	0.000565079
JU_AGING_TERC_TARGETS_UP	0.645289	2.51426	0.000582089
YAO_TEMPORAL_RESPONSE_TO_PROGESTERONE_CLUSTER_15	0.36893	2.51227	0.000587821
DARWICHE_PAPILLOMA_RISK_LOW_UP	0.171081	2.50904	0.000598479
YAMAZAKI_TCEB3_TARGETS_DN	0.149739	2.50886	0.000597863
KIM_WT1_TARGETS_12HR_UP	0.17311	2.50821	0.000600475
ODONNELL_TARGETS_OF_MYC_AND_TFRC_DN	0.322171	2.5076	0.000599858
KONDO_PROSTATE_CANCER_WITH_H3K27ME3	0.158563	2.50688	0.000602385
MULLIGHAN_MLL_SIGNATURE_2_DN	0.133257	2.50461	0.000611185
GRYDER_PAX3FOXO1_ENHANCERS_IN_TADS	0.0719715	2.50393	0.000612123
GENTILE_UV_RESPONSE_CLUSTER_D6	0.353866	2.50294	0.000616246
TONKS_TARGETS_OF_RUNX1_RUNX1T1_FUSION_MONOCYTE_UP	0.154258	2.50208	0.000618786
KEGG_LONG_TERM_POTENTIATION	0.252879	2.50194	0.000619718
STEIN_ESRRA_TARGETS_RESPONSIVE_TO_ESTROGEN_DN	0.340013	2.49715	0.000641243
MISHRA_CARCINOMA_ASSOCIATED_FIBROBLAST_DN	0.440605	2.49529	0.000645325
FERREIRA_EWINGS_SARCOMA_UNSTABLE_VS_STABLE_UP	0.173005	2.49427	0.000654255
BROCKE_APOPTOSIS_REVERSED_BY_IL6	0.180754	2.49029	0.00067095
GNATENKO_PLATELET_SIGNATURE	0.32303	2.49014	0.000670269
PENG_LEUCINE_DEPRIVATION_DN	0.155286	2.48841	0.000674377
REACTOME_DEGRADATION_OF_THE_EXTRACELLULAR_MATRIX	0.399411	2.48748	0.000683107
FEVR_CTNNB1_TARGETS_DN	0.0930304	2.48606	0.000687123
ZHAN_V1_LATE_DIFFERENTIATION_GENES_UP	0.372559	2.4801	0.000708464
OUELLET_CULTURED_OVARIAN_CANCER_INVASIVE_VS_LMP_DN	0.378904	2.47909	0.000715533
GROSS_ELK3_TARGETS_UP	0.396221	2.47805	0.000714811
MCMURRAY_TP53_HRAS_COOPERATION_RESPONSE_UP	0.409628	2.47799	0.000714091
GRADE_COLON_AND_RECTAL_CANCER_UP	0.127999	2.47768	0.00071491
DURAND_STROMA_NS_UP	0.170325	2.47419	0.000739184
ZHAN_MULTIPLE_MYELOMA_SPIKED	0.455656	2.47374	0.000743136
TURASHVILI_BREAST_LOBULAR_CARCINOMA_VS_DUCTAL_NORMAL_DN	0.223191	2.47197	0.000751806
REACTOME_PLATELET_HOMEOSTASIS	0.24757	2.47052	0.000760337
KORKOLA_YOLK_SAC_TUMOR	0.283906	2.46798	0.000772064
MISHRA_CARCINOMA_ASSOCIATED_FIBROBLAST_UP	0.410736	2.46758	0.000772854
REACTOME_MITOTIC_M_M_G1_PHASES	0.168745	2.46722	0.000772081
SCHAEFFER_PROSTATE_DEVELOPMENT_6HR_DN	0.0973767	2.46552	0.000785493
PID_AURORA_B_PATHWAY	0.341797	2.4654	0.000784709
YAO_HOXA10_TARGETS_VIA_PROGESTERONE_DN	0.49025	2.46534	0.000785496
ZHENG_IL22_SIGNALING_UP	0.290452	2.46425	0.000789286
ONO_AML1_TARGETS_UP	0.420671	2.46321	0.000794637
LINDSTEDT_DENDRITIC_CELL_MATURATION_C	0.253048	2.4632	0.000793847
REACTOME_MHC_CLASS_II_ANTIGEN_PRESENTATION	0.227112	2.46264	0.000794577
KEGG_VASCULAR_SMOOTH_MUSCLE_CONTRACTION	0.195069	2.46194	0.000799919
PID_P75_NTR_PATHWAY	0.25271	2.46147	0.000799126
MARSON_FOXP3_CORE_DIRECT_TARGETS	0.472874	2.46057	0.000801354
REACTOME_ADP_SIGNALLING_THROUGH_P2RY12	0.456237	2.46007	0.000803658
BEGUM_TARGETS_OF_PAX3_FOXO1_FUSION_DN	0.311272	2.45993	0.000802863
EINAV_INTERFERON_SIGNATURE_IN_CANCER	0.400291	2.45992	0.000802071
SASAI_RESISTANCE_TO_NEOPLASTIC_TRANSFROMATION	0.303136	2.45843	0.000816465
BIOCARTA_LAIR_PATHWAY	0.505631	2.45766	0.000820266
REACTOME_ANTIGEN_PROCESSING_CROSS_PRESENTATION	0.247846	2.45718	0.000821016
ACEVEDO_LIVER_CANCER_WITH_H3K9ME3_DN	0.217692	2.45637	0.000826357
MIKKELSEN_MEF_ICP_WITH_H3K27ME3	0.151747	2.45512	0.000833225
PID_S1P_S1P1_PATHWAY	0.432214	2.45438	0.000833925
LY_AGING_MIDDLE_UP	0.590041	2.4532	0.00083921
GERY_CEBP_TARGETS	0.193802	2.45188	0.000847424
SA_MMP_CYTOKINE_CONNECTION	0.514446	2.45173	0.000846595
SONG_TARGETS_OF_IE86_CMV_PROTEIN	0.275962	2.45128	0.000845768
ROSS_AML_WITH_MLL_FUSIONS	0.256094	2.45111	0.000846476
NAKAMURA_METASTASIS_MODEL_DN	0.328391	2.45111	0.00084565
TSENG_IRS1_TARGETS_UP	0.204625	2.4486	0.000862965
HOFMANN_MYELODYSPLASTIC_SYNDROM_LOW_RISK_DN	0.387339	2.44781	0.000868193
REACTOME_SEMA4D_INDUCED_CELL_MIGRATION_AND_GROWTH_CONE_COLLAPSE	0.419783	2.44585	0.000879425
BROWNE_HCMV_INFECTION_20HR_DN	0.210255	2.44495	0.000884637
KEGG_MAPK_SIGNALING_PATHWAY	0.130191	2.44477	0.000885282
REACTOME_ACYL_CHAIN_REMODELLING_OF_PC	0.446173	2.44229	0.000894944
KEGG_B_CELL_RECEPTOR_SIGNALING_PATHWAY	0.239618	2.44162	0.000894077
PID_CD8_TCR_DOWNSTREAM_PATHWAY	0.24953	2.43988	0.000899246
BIOCARTA_FIBRINOLYSIS_PATHWAY	0.580352	2.43967	0.000899905
PID_GLYPICAN_1PATHWAY	0.387584	2.43894	0.000904992
TURASHVILI_BREAST_DUCTAL_CARCINOMA_VS_LOBULAR_NORMAL_DN	0.259266	2.43865	0.000907126
GHANDHI_DIRECT_IRRADIATION_UP	0.210599	2.43773	0.000909253
REACTOME_S_PHASE	0.199073	2.43705	0.000911445
BROWNE_HCMV_INFECTION_14HR_DN	0.127057	2.43677	0.000915062
VALK_AML_CLUSTER_9	0.36768	2.43675	0.000914182
REACTOME_G_ALPHA_Z_SIGNALLING_EVENTS	0.313849	2.43504	0.000931245
BROWNE_HCMV_INFECTION_18HR_DN	0.162317	2.43366	0.000939265
AMIT_SERUM_RESPONSE_120_MCF10A	0.258688	2.43268	0.000950235
DAVIES_MULTIPLE_MYELOMA_VS_MGUS_DN	0.391274	2.43246	0.000949325
LEE_LIVER_CANCER_HEPATOBLAST	0.49767	2.43103	0.000960273
AMIT_EGF_RESPONSE_60_MCF10A	0.34005	2.42845	0.000971188
DITTMER_PTHLH_TARGETS_UP	0.198998	2.42823	0.000971745
DOUGLAS_BMI1_TARGETS_DN	0.118968	2.42773	0.000970818
LU_AGING_BRAIN_DN	0.169011	2.42581	0.00098024
GOTZMANN_EPITHELIAL_TO_MESENCHYMAL_TRANSITION_UP	0.245411	2.42537	0.000983725
PEDRIOLI_MIR31_TARGETS_DN	0.109319	2.42521	0.000985801
CHIARADONNA_NEOPLASTIC_TRANSFORMATION_KRAS_CDC25_DN	0.292928	2.42445	0.0009908
KEGG_HYPERTROPHIC_CARDIOMYOPATHY_HCM	0.227842	2.42358	0.000992849
VANDESLUIS_COMMD1_TARGETS_GROUP_4_UP	0.464275	2.42319	0.000997818
PID_ENDOTHELIN_PATHWAY	0.260042	2.42216	0.00100569
ZHANG_TARGETS_OF_EWSR1_FLI1_FUSION	0.225236	2.4221	0.00100623
PID_ALPHA_SYNUCLEIN_PATHWAY	0.35538	2.42171	0.00101258
GROSS_HYPOXIA_VIA_ELK3_DN	0.165156	2.4205	0.00101747
ELVIDGE_HYPOXIA_BY_DMOG_UP	0.183929	2.41958	0.00101948
GARGALOVIC_RESPONSE_TO_OXIDIZED_PHOSPHOLIPIDS_GREY_DN	0.265236	2.41672	0.00104354
PID_EPHA_FWDPATHWAY	0.350682	2.41658	0.00104404
NOUSHMEHR_GBM_SILENCED_BY_METHYLATION	0.303075	2.41652	0.00104306
LEIN_MIDBRAIN_MARKERS	0.230267	2.41646	0.00104207
DELACROIX_RARG_BOUND_MEF	0.114094	2.4129	0.0010833
CLASPER_LYMPHATIC_VESSELS_DURING_METASTASIS_UP	0.468389	2.41044	0.00110108
KOKKINAKIS_METHIONINE_DEPRIVATION_96HR_UP	0.19923	2.4104	0.00110005
DACOSTA_ERCC3_ALLELE_XPCS_VS_TTD_UP	0.393496	2.40656	0.00113099
RAY_TUMORIGENESIS_BY_ERBB2_CDC25A_UP	0.202587	2.40561	0.00113729
MARKEY_RB1_CHRONIC_LOF_UP	0.199687	2.40471	0.00114061
ZHANG_TLX_TARGETS_60HR_UP	0.124296	2.39757	0.00121359
BIOCARTA_AMI_PATHWAY	0.447124	2.39656	0.00122263
MORI_PLASMA_CELL_DN	0.379612	2.39613	0.00122299
KIM_HYPOXIA	0.402329	2.39573	0.00122472
SCHRAETS_MLL_TARGETS_UP	0.337603	2.39283	0.00124523
BOYAULT_LIVER_CANCER_SUBCLASS_G123_UP	0.307239	2.39003	0.00127293
AZARE_NEOPLASTIC_TRANSFORMATION_BY_STAT3_DN	0.499374	2.38941	0.00128323
HOFFMAN_CLOCK_TARGETS_UP	0.586309	2.38909	0.00128639
BIOCARTA_PML_PATHWAY	0.473385	2.3888	0.00128952
PAPASPYRIDONOS_UNSTABLE_ATEROSCLEROTIC_PLAQUE_DN	0.311966	2.38817	0.00129853
REACTOME_PLATELET_ADHESION_TO_EXPOSED_COLLAGEN	0.582781	2.38816	0.00129733
RIGGINS_TAMOXIFEN_RESISTANCE_DN	0.144214	2.38803	0.00129613
MACLACHLAN_BRCA1_TARGETS_DN	0.490948	2.38755	0.00129641
TSENG_ADIPOGENIC_POTENTIAL_DN	0.310003	2.38579	0.0013079
LE_SKI_TARGETS_UP	0.488315	2.38488	0.00131533
CUI_TCF21_TARGETS_UP	0.337539	2.38276	0.00132557
SPIELMAN_LYMPHOBLAST_EUROPEAN_VS_ASIAN_UP	0.0971214	2.37738	0.00138157
BURTON_ADIPOGENESIS_PEAK_AT_0HR	0.257213	2.37516	0.00140467
HOOI_ST7_TARGETS_UP	0.220509	2.37286	0.00142045
GRAESSMANN_RESPONSE_TO_MC_AND_DOXORUBICIN_UP	0.0871646	2.37098	0.00144472
PID_ER_NONGENOMIC_PATHWAY	0.315219	2.36858	0.00146201
WILLIAMS_ESR1_TARGETS_UP	0.38948	2.36849	0.00146067
BIOCARTA_IL5_PATHWAY	0.610071	2.36778	0.00146502
CROONQUIST_IL6_DEPRIVATION_UP	0.43676	2.36688	0.00147356
IWANAGA_CARCINOGENESIS_BY_KRAS_PTEN_DN	0.112489	2.36686	0.00147221
ABBUD_LIF_SIGNALING_2_UP	0.51128	2.36653	0.00147228
WATANABE_COLON_CANCER_MSI_VS_MSS_DN	0.231104	2.36514	0.0014794
CHIANG_LIVER_CANCER_SUBCLASS_UNANNOTATED_DN	0.147946	2.36364	0.00149515
MANTOVANI_VIRAL_GPCR_SIGNALING_UP	0.217622	2.36143	0.00151773
CAIRO_HEPATOBLASTOMA_CLASSES_UP	0.0861326	2.35963	0.00153897
KEGG_METABOLISM_OF_XENOBIOTICS_BY_CYTOCHROME_P450	0.251425	2.35869	0.00155034
PID_THROMBIN_PAR4_PATHWAY	0.504815	2.35738	0.00156169
PID_IL2_STAT5_PATHWAY	0.359739	2.35712	0.00156598
HARRIS_BRAIN_CANCER_PROGENITORS	0.309696	2.3568	0.00156601
YAN_ESCAPE_FROM_ANOIKIS	0.408846	2.35564	0.00157734
REACTOME_ACYL_CHAIN_REMODELLING_OF_PS	0.497563	2.35553	0.00157591
LEIN_MEDULLA_MARKERS	0.22487	2.35427	0.00158994
HOQUE_METHYLATED_IN_CANCER	0.27298	2.35386	0.00159134
KOBAYASHI_EGFR_SIGNALING_6HR_DN	0.45361	2.35302	0.00159973
GENTLES_LEUKEMIC_STEM_CELL_DN	0.475846	2.35256	0.00160809
BASSO_CD40_SIGNALING_DN	0.252433	2.35208	0.00160941
REACTOME_GLUCURONIDATION	0.513242	2.35136	0.00161631
CHEN_ETV5_TARGETS_SERTOLI	0.467246	2.35063	0.00162468
LOPES_METHYLATED_IN_COLON_CANCER_UP	0.375373	2.34858	0.00164285
CHICAS_RB1_TARGETS_LOW_SERUM	0.211395	2.34522	0.00167905
PID_PLK1_PATHWAY	0.298911	2.34465	0.00168313
MASRI_RESISTANCE_TO_TAMOXIFEN_AND_AROMATASE_INHIBITORS_DN	0.447231	2.34462	0.0016844
KATSANOU_ELAVL1_TARGETS_DN	0.170748	2.34383	0.00168977
REACTOME_CELL_JUNCTION_ORGANIZATION	0.228528	2.34374	0.00168825
MURATA_VIRULENCE_OF_H_PILORI	0.40002	2.3413	0.00170892
REACTOME_GAP_JUNCTION_TRAFFICKING	0.384206	2.34059	0.00172404
WANG_LSD1_TARGETS_UP	0.411403	2.33858	0.00174061
LINSLEY_MIR16_TARGETS	0.144102	2.33562	0.00176532
REACTOME_ACYL_CHAIN_REMODELLING_OF_PE	0.430981	2.33378	0.001794
AMIT_EGF_RESPONSE_120_MCF10A	0.303255	2.33317	0.00180351
RORIE_TARGETS_OF_EWSR1_FLI1_FUSION_DN	0.364146	2.33188	0.00181014
PID_AP1_PATHWAY	0.237887	2.33133	0.00181406
SATO_SILENCED_EPIGENETICALLY_IN_PANCREATIC_CANCER	0.298023	2.33014	0.00183866
LI_WILMS_TUMOR_VS_FETAL_KIDNEY_2_UP	0.348719	2.327	0.0018715
REACTOME_FORMATION_OF_FIBRIN_CLOT_CLOTTING_CASCADE	0.356147	2.32549	0.00189463
KEGG_ALZHEIMERS_DISEASE	0.164766	2.32143	0.00193441
XU_GH1_AUTOCRINE_TARGETS_UP	0.131904	2.3204	0.00194224
BURTON_ADIPOGENESIS_PEAK_AT_2HR	0.272984	2.3172	0.00198318
JOHANSSON_BRAIN_CANCER_EARLY_VS_LATE_DN	0.29741	2.31431	0.00202254
REACTOME_TCR_SIGNALING	0.284131	2.31398	0.00202628
INAMURA_LUNG_CANCER_SCC_UP	0.512763	2.31393	0.00202723
VERNOCHET_ADIPOGENESIS	0.442266	2.3136	0.00202954
BROWNE_HCMV_INFECTION_30MIN_DN	0.170349	2.31228	0.00205923
LIN_TUMOR_ESCAPE_FROM_IMMUNE_ATTACK	0.471832	2.31173	0.00206295
BOYLAN_MULTIPLE_MYELOMA_C_DN	0.269116	2.31129	0.00206933
BROWNE_HCMV_INFECTION_16HR_DN	0.21798	2.30825	0.00209752
VILLANUEVA_LIVER_CANCER_KRT19_UP	0.153017	2.30812	0.00209568
ONDER_CDH1_TARGETS_1_DN	0.151397	2.30779	0.00210058
BIOCARTA_DC_PATHWAY	0.410379	2.30676	0.00211107
SCHLESINGER_H3K27ME3_IN_NORMAL_AND_METHYLATED_IN_CANCER	0.378083	2.30338	0.00215131
TAKEDA_TARGETS_OF_NUP98_HOXA9_FUSION_3D_DN	0.367884	2.29725	0.00224315
LI_WILMS_TUMOR_ANAPLASTIC_UP	0.432239	2.29579	0.00226988
REACTOME_ACYL_CHAIN_REMODELLING_OF_PI	0.497563	2.29509	0.00227736
SHIN_B_CELL_LYMPHOMA_CLUSTER_3	0.362159	2.29144	0.00232798
PID_FOXM1_PATHWAY	0.303945	2.29137	0.00232595
KEGG_MELANOGENESIS	0.194584	2.29054	0.00234407
DARWICHE_SKIN_TUMOR_PROMOTER_UP	0.171006	2.28843	0.00238398
DAUER_STAT3_TARGETS_DN	0.275656	2.28648	0.00241697
KEGG_LYSOSOME	0.18037	2.28617	0.00242166
GRESHOCK_CANCER_COPY_NUMBER_UP	0.108327	2.28427	0.00246538
DAUER_STAT3_TARGETS_UP	0.284524	2.28338	0.00248359
BOYLAN_MULTIPLE_MYELOMA_D_DN	0.23364	2.2805	0.00253251
REACTOME_IL_3_5_AND_GM_CSF_SIGNALING	0.302302	2.28029	0.0025383
ZHONG_SECRETOME_OF_LUNG_CANCER_AND_ENDOTHELIUM	0.241147	2.27947	0.00255487
REACTOME_HEPARAN_SULFATE_HEPARIN_HS_GAG_METABOLISM	0.27624	2.27822	0.00257943
DORN_ADENOVIRUS_INFECTION_24HR_DN	0.286694	2.278	0.0025839
SCIBETTA_KDM5B_TARGETS_DN	0.213238	2.27794	0.00258167
LEIN_CHOROID_PLEXUS_MARKERS	0.192492	2.27743	0.00258757
NIKOLSKY_BREAST_CANCER_20Q12_Q13_AMPLICON	0.171418	2.27557	0.00261753
PID_BCR_5PATHWAY	0.243694	2.27352	0.00264992
IWANAGA_CARCINOGENESIS_BY_KRAS_PTEN_UP	0.153659	2.27335	0.00264764
PID_IL27_PATHWAY	0.376976	2.27206	0.00267212
KAAB_FAILED_HEART_ATRIUM_DN	0.167811	2.27184	0.0026752
BIOCARTA_CCR3_PATHWAY	0.386816	2.27004	0.00271922
WANG_ADIPOGENIC_GENES_REPRESSED_BY_SIRT1	0.36935	2.26838	0.00275416
INGRAM_SHH_TARGETS_UP	0.177276	2.26823	0.00275181
WAMUNYOKOLI_OVARIAN_CANCER_GRADES_1_2_UP	0.16548	2.26785	0.0027587
OHGUCHI_LIVER_HNF4A_TARGETS_DN	0.16438	2.2676	0.00275765
WACKER_HYPOXIA_TARGETS_OF_VHL	0.518464	2.26604	0.00278168
TSENG_IRS1_TARGETS_DN	0.170501	2.26601	0.00277931
BEGUM_TARGETS_OF_PAX3_FOXO1_FUSION_UP	0.249058	2.26412	0.00281539
MISSIAGLIA_REGULATED_BY_METHYLATION_DN	0.177577	2.26398	0.002813
BIOCARTA_SRCRPTP_PATHWAY	0.562218	2.26212	0.00284102
REACTOME_PLC_BETA_MEDIATED_EVENTS	0.294825	2.26138	0.00284388
HANSON_HRAS_SIGNALING_VIA_NFKB	0.39929	2.26073	0.00285469
REACTOME_G_ALPHA1213_SIGNALLING_EVENTS	0.225283	2.26028	0.00286799
WATTEL_AUTONOMOUS_THYROID_ADENOMA_UP	0.228412	2.2594	0.00288655
YAO_TEMPORAL_RESPONSE_TO_PROGESTERONE_CLUSTER_13	0.148792	2.25568	0.00294719
KASLER_HDAC7_TARGETS_1_UP	0.14399	2.25553	0.00295127
PUJANA_BREAST_CANCER_LIT_INT_NETWORK	0.200283	2.25487	0.00296317
WORSCHECH_TUMOR_EVASION_AND_TOLEROGENICITY_UP	0.353882	2.25484	0.00296067
REACTOME_SIGNAL_REGULATORY_PROTEIN_SIRP_FAMILY_INTERACTIONS	0.529014	2.25335	0.00299749
PID_S1P_S1P2_PATHWAY	0.385299	2.25082	0.00305647
TONKS_TARGETS_OF_RUNX1_RUNX1T1_FUSION_SUSTAINDED_IN_ERYTHROCYTE_UP	0.289996	2.24986	0.00307223
SCHOEN_NFKB_SIGNALING	0.329643	2.24968	0.00307097
REACTOME_GABA_RECEPTOR_ACTIVATION	0.256435	2.24889	0.00308276
BIOCARTA_SPPA_PATHWAY	0.392772	2.24481	0.00315966
ACEVEDO_METHYLATED_IN_LIVER_CANCER_DN	0.071093	2.24481	0.00315701
FRASOR_RESPONSE_TO_SERM_OR_FULVESTRANT_DN	0.26415	2.24444	0.00316738
GRANDVAUX_IFN_RESPONSE_NOT_VIA_IRF3	0.504412	2.23763	0.00332467
BIDUS_METASTASIS_UP	0.136532	2.23672	0.00334274
VERRECCHIA_RESPONSE_TO_TGFB1_C5	0.407183	2.23625	0.00335031
HAN_JNK_SINGALING_DN	0.31046	2.23612	0.00335141
SHIN_B_CELL_LYMPHOMA_CLUSTER_9	0.427581	2.2353	0.0033746
PID_SHP2_PATHWAY	0.244959	2.23304	0.00342221
VALK_AML_WITH_FLT3_ITD	0.316329	2.23288	0.00342326
KEGG_NEUROTROPHIN_SIGNALING_PATHWAY	0.168935	2.23264	0.00342564
LOPEZ_MESOTHELIOMA_SURVIVAL_OVERALL_DN	0.493862	2.23256	0.00342537
MCCLUNG_CREB1_TARGETS_UP	0.19193	2.23215	0.00342769
PID_SYNDECAN_2_PATHWAY	0.324371	2.23169	0.00343902
HOFMANN_MYELODYSPLASTIC_SYNDROM_RISK_UP	0.3919	2.23139	0.00344265
BURTON_ADIPOGENESIS_10	0.34774	2.23061	0.00346162
VETTER_TARGETS_OF_PRKCA_AND_ETS1_DN	0.464364	2.23054	0.00345876
MAHADEVAN_IMATINIB_RESISTANCE_DN	0.447684	2.22925	0.00348041
CLAUS_PGR_POSITIVE_MENINGIOMA_DN	0.526618	2.22831	0.00350214
LIANG_SILENCED_BY_METHYLATION_DN	0.551054	2.22652	0.00354521
FARMER_BREAST_CANCER_APOCRINE_VS_LUMINAL	0.110656	2.22648	0.00354228
FRASOR_RESPONSE_TO_ESTRADIOL_DN	0.215784	2.22575	0.00355867
MORI_MATURE_B_LYMPHOCYTE_DN	0.226762	2.22565	0.00356084
BERTUCCI_MEDULLARY_VS_DUCTAL_BREAST_CANCER_UP	0.13774	2.22475	0.00358361
ROYLANCE_BREAST_CANCER_16Q_COPY_NUMBER_DN	0.383683	2.22433	0.00359587
PID_BETA_CATENIN_NUC_PATHWAY	0.213354	2.22355	0.00361611
BIOCARTA_EXTRINSIC_PATHWAY	0.516236	2.22276	0.00362715
VALK_AML_CLUSTER_4	0.36684	2.2221	0.00363309
BIOCARTA_BIOPEPTIDES_PATHWAY	0.286004	2.22196	0.00363011
SATO_SILENCED_BY_METHYLATION_IN_PANCREATIC_CANCER_2	0.284149	2.21995	0.00368073
SCHAEFFER_SOX9_TARGETS_IN_PROSTATE_DEVELOPMENT_DN	0.286069	2.21991	0.00368025
MITSIADES_RESPONSE_TO_APLIDIN_DN	0.124845	2.21966	0.00368104
REACTOME_DOWNSTREAM_TCR_SIGNALING	0.328441	2.21879	0.00369968
JI_RESPONSE_TO_FSH_DN	0.250478	2.21833	0.00370425
WIERENGA_STAT5A_TARGETS_GROUP2	0.255297	2.21636	0.00374943
MIKKELSEN_ES_HCP_WITH_H3K27ME3	0.302446	2.21576	0.00376038
REACTOME_CYCLIN_A_B1_ASSOCIATED_EVENTS_DURING_G2_M_TRANSITION	0.468445	2.21522	0.00377261
SIMBULAN_PARP1_TARGETS_UP	0.3427	2.21502	0.00377588
REACTOME_INTRINSIC_PATHWAY_FOR_APOPTOSIS	0.348409	2.21467	0.00378289
BREUHAHN_GROWTH_FACTOR_SIGNALING_IN_LIVER_CANCER	0.398612	2.21357	0.00380128
MCCABE_HOXC6_TARGETS_DN	0.405793	2.21304	0.00381851
PID_RAC1_PATHWAY	0.259781	2.21172	0.00385712
REACTOME_COSTIMULATION_BY_THE_CD28_FAMILY	0.238608	2.2109	0.00386284
PID_EPHRINB_REV_PATHWAY	0.337152	2.20911	0.00390512
STEIN_ESR1_TARGETS	0.208886	2.20903	0.00390455
LEE_AGING_NEOCORTEX_UP	0.205347	2.208	0.00392774
REACTOME_N_GLYCAN_ANTENNAE_ELONGATION_IN_THE_MEDIAL_TRANS_GOLGI	0.432013	2.20791	0.00393086
ODONNELL_TFRC_TARGETS_UP	0.099564	2.20744	0.003939
VANDESLUIS_COMMD1_TARGETS_GROUP_3_DN	0.298204	2.20733	0.00393834
REACTOME_ADP_SIGNALLING_THROUGH_P2RY1	0.371573	2.20565	0.0039777
DELACROIX_RAR_BOUND_ES	0.0924101	2.20551	0.00398074
REACTOME_CLASS_B_2_SECRETIN_FAMILY_RECEPTORS	0.204066	2.20261	0.00405008
PURBEY_TARGETS_OF_CTBP1_NOT_SATB1_DN	0.0930315	2.19957	0.0041195
BIOCARTA_STATHMIN_PATHWAY	0.409168	2.19864	0.00413986
VALK_AML_WITH_11Q23_REARRANGED	0.434314	2.19404	0.00427652
KEGG_DRUG_METABOLISM_OTHER_ENZYMES	0.268078	2.18992	0.00438925
PID_LYSOPHOSPHOLIPID_PATHWAY	0.227784	2.1887	0.00441544
AIGNER_ZEB1_TARGETS	0.320224	2.18635	0.00446411
KEGG_GLYCOSPHINGOLIPID_BIOSYNTHESIS_GLOBO_SERIES	0.483647	2.18244	0.00458873
ABRAHAM_ALPC_VS_MULTIPLE_MYELOMA_UP	0.357789	2.17897	0.00469856
BRUINS_UVC_RESPONSE_VIA_TP53_GROUP_C	0.204383	2.17874	0.00470102
ZHAN_MULTIPLE_MYELOMA_LB_UP	0.293981	2.17847	0.00470469
GUILLAUMOND_KLF10_TARGETS_UP	0.261208	2.17736	0.00473818
REACTOME_G_BETA_GAMMA_SIGNALLING_THROUGH_PLC_BETA	0.399009	2.17401	0.00484846
ZHANG_PROLIFERATING_VS_QUIESCENT	0.260026	2.17324	0.00486451
STEGER_ADIPOGENESIS_UP	0.394134	2.17291	0.00486682
MIKKELSEN_NPC_ICP_WITH_H3K27ME3	0.537973	2.17256	0.00487662
REACTOME_CRMPS_IN_SEMA3A_SIGNALING	0.47992	2.17223	0.00488388
RICKMAN_TUMOR_DIFFERENTIATED_MODERATELY_VS_POORLY_UP	0.171142	2.17215	0.00488244
PLASARI_TGFB1_SIGNALING_VIA_NFIC_1HR_DN	0.180028	2.17045	0.0049302
PID_HEDGEHOG_2PATHWAY	0.394816	2.16957	0.00495096
BIOCARTA_ECM_PATHWAY	0.373562	2.16914	0.00496424
REACTOME_POTASSIUM_CHANNELS	0.189355	2.16885	0.00497019
MIKKELSEN_MCV6_ICP_WITH_H3K4ME3_AND_H3K27ME3	0.330267	2.16873	0.00496869
BIOCARTA_SALMONELLA_PATHWAY	0.487319	2.16851	0.00497216
RAO_BOUND_BY_SALL4_ISOFORM_B	0.0821877	2.16596	0.00503347
MCLACHLAN_DENTAL_CARIES_DN	0.216109	2.1652	0.00505033
FARMER_BREAST_CANCER_BASAL_VS_LULMINAL	0.104107	2.16372	0.00509681
ALONSO_METASTASIS_UP	0.136364	2.16327	0.00510629
WANG_IMMORTALIZED_BY_HOXA9_AND_MEIS1_UP	0.336865	2.16268	0.00511947
DORN_ADENOVIRUS_INFECTION_48HR_DN	0.281211	2.16171	0.00514369
KYNG_DNA_DAMAGE_BY_GAMMA_RADIATION	0.2092	2.16164	0.00514085
REACTOME_ACYL_CHAIN_REMODELLING_OF_PG	0.452662	2.16156	0.00514053
KORKOLA_EMBRYONIC_CARCINOMA_VS_SEMINOMA_UP	0.401001	2.1606	0.00517919
FISCHER_DIRECT_P53_TARGETS_META_ANALYSIS	0.108173	2.16048	0.00517882
HIRSCH_CELLULAR_TRANSFORMATION_SIGNATURE_DN	0.189789	2.15998	0.00520018
PID_VEGFR1_2_PATHWAY	0.22522	2.15847	0.0052375
BIOCARTA_TOB1_PATHWAY	0.409179	2.15838	0.00523582
REACTOME_REGULATION_OF_INSULIN_SECRETION	0.197113	2.15512	0.00534867
PEDERSEN_METASTASIS_BY_ERBB2_ISOFORM_6	0.345491	2.15508	0.00534449
PID_VEGFR1_PATHWAY	0.353129	2.15188	0.00545196
REACTOME_TRANSMEMBRANE_TRANSPORT_OF_SMALL_MOLECULES	0.0928345	2.15144	0.00546102
XU_HGF_TARGETS_INDUCED_BY_AKT1_6HR	0.415584	2.15031	0.00550397
BIOCARTA_EPHA4_PATHWAY	0.564559	2.14943	0.00552396
PODAR_RESPONSE_TO_ADAPHOSTIN_DN	0.414066	2.14914	0.00552688
WAMUNYOKOLI_OVARIAN_CANCER_LMP_UP	0.117666	2.14896	0.00553112
REACTOME_REGULATION_OF_MITOTIC_CELL_CYCLE	0.209711	2.14875	0.00553886
WOOD_EBV_EBNA1_TARGETS_DN	0.265637	2.14476	0.00570101
PYEON_CANCER_HEAD_AND_NECK_VS_CERVICAL_DN	0.343892	2.14459	0.00570629
TSENG_ADIPOGENIC_POTENTIAL_UP	0.35011	2.14447	0.00570549
MORI_PRE_BI_LYMPHOCYTE_DN	0.213484	2.14386	0.00572752
PID_FCER1_PATHWAY	0.231753	2.14352	0.00573044
BURTON_ADIPOGENESIS_11	0.247776	2.14246	0.00577644
SAGIV_CD24_TARGETS_DN	0.279005	2.14165	0.00580088
ZHAN_LATE_DIFFERENTIATION_GENES_UP	0.319188	2.14008	0.0058444
THUM_MIR21_TARGETS_HEART_DISEASE_UP	0.443064	2.13927	0.00585553
LEIN_NEURON_MARKERS	0.223427	2.13886	0.00585941
FONTAINE_THYROID_TUMOR_UNCERTAIN_MALIGNANCY_DN	0.364042	2.1378	0.00589441
YANG_BREAST_CANCER_ESR1_DN	0.360839	2.13579	0.00596881
CADWELL_ATG16L1_TARGETS_UP	0.196586	2.13529	0.00598335
HERNANDEZ_ABERRANT_MITOSIS_BY_DOCETACEL_2NM_UP	0.203618	2.13434	0.00601207
CORRE_MULTIPLE_MYELOMA_DN	0.23544	2.13409	0.00601342
URS_ADIPOCYTE_DIFFERENTIATION_DN	0.329223	2.13355	0.00602429
ABE_VEGFA_TARGETS	0.40669	2.13309	0.0060387
THEILGAARD_NEUTROPHIL_AT_SKIN_WOUND_UP	0.212976	2.13288	0.00603647
WEINMANN_ADAPTATION_TO_HYPOXIA_DN	0.292684	2.13286	0.00603185
NUTT_GBM_VS_AO_GLIOMA_UP	0.266683	2.1322	0.00604863
LY_AGING_PREMATURE_DN	0.340004	2.13156	0.00606298
BAE_BRCA1_TARGETS_UP	0.218525	2.13113	0.00606907
VANDESLUIS_COMMD1_TARGETS_GROUP_3_UP	0.196158	2.13032	0.00609419
HOEGERKORP_CD44_TARGETS_DIRECT_UP	0.348408	2.12825	0.00617692
REACTOME_G_PROTEIN_BETA_GAMMA_SIGNALLING	0.339814	2.12659	0.0062327
HAN_JNK_SINGALING_UP	0.307207	2.12498	0.0063133
BIOCARTA_TCR_PATHWAY	0.269062	2.12418	0.00633213
BROWNE_HCMV_INFECTION_8HR_DN	0.262508	2.12299	0.00638618
BHATTACHARYA_EMBRYONIC_STEM_CELL	0.193109	2.12051	0.006472
JOHNSTONE_PARVB_TARGETS_1_DN	0.23384	2.12028	0.00647064
PID_S1P_META_PATHWAY	0.381028	2.12018	0.0064693
REACTOME_REGULATION_OF_INSULIN_SECRETION_BY_GLUCAGON_LIKE_PEPTIDE1	0.277391	2.11901	0.00651036
BENPORATH_ES_1	0.0958702	2.11841	0.00652442
DUTERTRE_ESTRADIOL_RESPONSE_6HR_DN	0.19257	2.11766	0.00655131
MARKS_HDAC_TARGETS_UP	0.37676	2.11764	0.00654636
REACTOME_P2Y_RECEPTORS	0.50575	2.11761	0.00654141
YAGUE_PRETUMOR_DRUG_RESISTANCE_DN	0.483273	2.11679	0.00656816
NEWMAN_ERCC6_TARGETS_UP	0.37856	2.11652	0.00657024
WU_SILENCED_BY_METHYLATION_IN_BLADDER_CANCER	0.247776	2.11563	0.0066075
HONRADO_BREAST_CANCER_BRCA1_VS_BRCA2	0.411474	2.11539	0.0066142
BURTON_ADIPOGENESIS_9	0.189059	2.11375	0.006677
CASTELLANO_NRAS_TARGETS_DN	0.458699	2.11195	0.00674444
REACTOME_IL_2_SIGNALING	0.273583	2.11032	0.00678968
FERRANDO_T_ALL_WITH_MLL_ENL_FUSION_DN	0.194701	2.11027	0.00678812
KORKOLA_EMBRYONAL_CARCINOMA_UP	0.278908	2.1094	0.0068203
RASHI_RESPONSE_TO_IONIZING_RADIATION_4	0.234679	2.10823	0.00687373
GAVIN_FOXP3_TARGETS_CLUSTER_P2	0.214092	2.10732	0.00691164
GAUSSMANN_MLL_AF4_FUSION_TARGETS_A_DN	0.19428	2.10657	0.00694358
PID_LIS1_PATHWAY	0.329573	2.10606	0.00695704
ZHAN_MULTIPLE_MYELOMA_HP_DN	0.277079	2.10524	0.00697863
ITO_PTTG1_TARGETS_UP	0.50181	2.1048	0.00699538
PID_AJDISS_2PATHWAY	0.252022	2.10314	0.00706344
REACTOME_HS_GAG_BIOSYNTHESIS	0.328957	2.10163	0.0071128
WOOD_EBV_EBNA1_TARGETS_UP	0.17084	2.10162	0.0071075
BOSCO_ALLERGEN_INDUCED_TH2_ASSOCIATED_MODULE	0.15243	2.09999	0.00717408
VALK_AML_CLUSTER_11	0.29573	2.09839	0.00723676
CONCANNON_APOPTOSIS_BY_EPOXOMICIN_UP	0.119218	2.0983	0.00723717
NAKAMURA_METASTASIS_MODEL_UP	0.274426	2.09623	0.00731385
PID_ANGIOPOIETIN_RECEPTOR_PATHWAY	0.249133	2.09511	0.00736952
REACTOME_G_PROTEIN_ACTIVATION	0.339814	2.09399	0.0074125
GROSS_HYPOXIA_VIA_ELK3_UP	0.128839	2.09342	0.00743375
REACTOME_SYNTHESIS_OF_DNA	0.187829	2.09251	0.00747779
MONNIER_POSTRADIATION_TUMOR_ESCAPE_DN	0.0975553	2.09217	0.0074906
CROMER_METASTASIS_UP	0.202243	2.09132	0.00752554
SARRIO_EPITHELIAL_MESENCHYMAL_TRANSITION_DN	0.150339	2.0912	0.00752342
LU_EZH2_TARGETS_UP	0.10777	2.08953	0.00760555
WIERENGA_STAT5A_TARGETS_GROUP1	0.163281	2.08905	0.00762066
SMID_BREAST_CANCER_RELAPSE_IN_BONE_UP	0.186724	2.08854	0.00764371
PID_NETRIN_PATHWAY	0.314439	2.0864	0.00773903
REACTOME_SIGNALING_BY_FGFR3_MUTANTS	0.510025	2.08528	0.00778593
REACTOME_UNWINDING_OF_DNA	0.525342	2.08311	0.00786741
SHIPP_DLBCL_VS_FOLLICULAR_LYMPHOMA_DN	0.266473	2.08295	0.00786732
KYNG_DNA_DAMAGE_DN	0.126303	2.08276	0.00787186
MILI_PSEUDOPODIA_HAPTOTAXIS_DN	0.0729132	2.08191	0.00791878
WATTEL_AUTONOMOUS_THYROID_ADENOMA_DN	0.245863	2.08065	0.00797228
LI_CISPLATIN_RESISTANCE_DN	0.31769	2.08055	0.00796987
PETROVA_PROX1_TARGETS_UP	0.342539	2.07911	0.00805071
XU_RESPONSE_TO_TRETINOIN_AND_NSC682994_UP	0.444609	2.07878	0.00806192
OUELLET_OVARIAN_CANCER_INVASIVE_VS_LMP_UP	0.16725	2.07791	0.00811304
XU_HGF_TARGETS_INDUCED_BY_AKT1_48HR_UP	0.46966	2.07669	0.0081514
XU_HGF_SIGNALING_NOT_VIA_AKT1_48HR_UP	0.293942	2.07569	0.00818633
REACTOME_G_BETA_GAMMA_SIGNALLING_THROUGH_PI3KGAMMA	0.349031	2.07529	0.00819865
ZHAN_MULTIPLE_MYELOMA_LB_DN	0.290847	2.07518	0.00819945
LI_PROSTATE_CANCER_EPIGENETIC	0.323781	2.07505	0.00820144
KOKKINAKIS_METHIONINE_DEPRIVATION_96HR_DN	0.203776	2.07478	0.00821577
REACTOME_THE_NLRP3_INFLAMMASOME	0.53031	2.07049	0.00840678
DUNNE_TARGETS_OF_AML1_MTG8_FUSION_DN	0.391498	2.06875	0.00849583
PID_P53_DOWNSTREAM_PATHWAY	0.157771	2.06743	0.00856215
LINDSTEDT_DENDRITIC_CELL_MATURATION_B	0.247978	2.06609	0.00862043
PID_A6B1_A6B4_INTEGRIN_PATHWAY	0.256295	2.06384	0.00872923
BENPORATH_SOX2_TARGETS	0.0698473	2.063	0.00878949
ZHANG_TLX_TARGETS_36HR_DN	0.135948	2.06086	0.00889264
BRIDEAU_IMPRINTED_GENES	0.229809	2.05959	0.00895698
KANG_AR_TARGETS_UP	0.422286	2.05945	0.00896289
ZHENG_FOXP3_TARGETS_UP	0.329482	2.05926	0.00896429
CAFFAREL_RESPONSE_TO_THC_DN	0.316188	2.05788	0.009023
HOOI_ST7_TARGETS_DN	0.167692	2.05727	0.00904567
HASLINGER_B_CLL_WITH_13Q14_DELETION	0.354553	2.05719	0.00904362
MARTORIATI_MDM4_TARGETS_NEUROEPITHELIUM_UP	0.136286	2.05716	0.00903821
MARTINEZ_RESPONSE_TO_TRABECTEDIN_DN	0.105705	2.05714	0.00903281
HASINA_NOL7_TARGETS_UP	0.46375	2.05681	0.00904637
KIM_LIVER_CANCER_POOR_SURVIVAL_UP	0.376227	2.05624	0.00906668
PID_PI3K_PLC_TRK_PATHWAY	0.291376	2.05512	0.00912067
PID_NFAT_3PATHWAY	0.240147	2.05495	0.00912645
MALIK_REPRESSED_BY_ESTROGEN	0.497072	2.05493	0.009121
SAMOLS_TARGETS_OF_KHSV_MIRNAS_DN	0.231089	2.05463	0.00913004
KEGG_ETHER_LIPID_METABOLISM	0.323466	2.05336	0.00918927
BIOCARTA_SODD_PATHWAY	0.533717	2.05295	0.00920598
BRACHAT_RESPONSE_TO_CAMPTOTHECIN_DN	0.255755	2.05261	0.0092139
YIH_RESPONSE_TO_ARSENITE_C3	0.299815	2.05261	0.00920731
MOREIRA_RESPONSE_TO_TSA_DN	0.40751	2.05178	0.00925958
LOPEZ_MESOTHELIOMA_SURVIVAL_WORST_VS_BEST_UP	0.471842	2.0513	0.00928518
NAKAMURA_METASTASIS	0.266958	2.05056	0.00932311
PID_TRKR_PATHWAY	0.222461	2.05024	0.00933418
PEPPER_CHRONIC_LYMPHOCYTIC_LEUKEMIA_UP	0.313695	2.04845	0.00942262
REACTOME_REGULATION_OF_KIT_SIGNALING	0.436009	2.04753	0.00945898
MEISSNER_BRAIN_HCP_WITH_H3K4ME2	0.423163	2.04739	0.00945995
REACTOME_LIPOPROTEIN_METABOLISM	0.320538	2.04528	0.00958716
STOSSI_RESPONSE_TO_ESTRADIOL	0.252802	2.04485	0.00960348
REACTOME_ACTIVATION_OF_KAINATE_RECEPTORS_UPON_GLUTAMATE_BINDING	0.308771	2.04465	0.00960442
DIRMEIER_LMP1_RESPONSE_LATE_UP	0.240909	2.04401	0.00963627
REACTOME_GLUCAGON_TYPE_LIGAND_RECEPTORS	0.296074	2.04396	0.00963273
REACTOME_REGULATION_OF_IFNG_SIGNALING	0.477887	2.04374	0.00964248
MATTIOLI_MGUS_VS_PCL	0.181148	2.04368	0.00963785
KEGG_VEGF_SIGNALING_PATHWAY	0.202275	2.04236	0.0097036
MARTINELLI_IMMATURE_NEUTROPHIL_UP	0.514922	2.04141	0.00975171
QI_HYPOXIA	0.15122	2.04027	0.00980312
REACTOME_PROSTACYCLIN_SIGNALLING_THROUGH_PROSTACYCLIN_RECEPTOR	0.388451	2.03911	0.00986332
HOLLERN_ADENOMYOEPITHELIAL_BREAST_TUMOR	0.402812	2.03821	0.00991224
REACTOME_GABA_A_RECEPTOR_ACTIVATION	0.480143	2.03794	0.00991622
HOFMANN_MYELODYSPLASTIC_SYNDROM_RISK_DN	0.368131	2.03066	0.0103547
CHEN_LVAD_SUPPORT_OF_FAILING_HEART_DN	0.264673	2.02887	0.0104625
VERNELL_RETINOBLASTOMA_PATHWAY_UP	0.211304	2.028	0.0104989
REACTOME_DCC_MEDIATED_ATTRACTIVE_SIGNALING	0.470479	2.0278	0.0105046
TOMLINS_PROSTATE_CANCER_DN	0.272452	2.02712	0.0105464
KAPOSI_LIVER_CANCER_MET_UP	0.401606	2.0256	0.0106394
SIG_BCR_SIGNALING_PATHWAY	0.255128	2.02554	0.0106352
REACTOME_A_TETRASACCHARIDE_LINKER_SEQUENCE_IS_REQUIRED_FOR_GAG_SYNTHESIS	0.351478	2.02511	0.0106561
VANTVEER_BREAST_CANCER_POOR_PROGNOSIS	0.247238	2.0247	0.0106792
ACOSTA_PROLIFERATION_INDEPENDENT_MYC_TARGETS_DN	0.168071	2.02329	0.0107709
FIGUEROA_AML_METHYLATION_CLUSTER_5_DN	0.253289	2.02327	0.0107677
KEGG_GLYCOLYSIS_GLUCONEOGENESIS	0.219809	2.02316	0.0107645
ENGELMANN_CANCER_PROGENITORS_UP	0.257535	2.02262	0.0107906
SANSOM_WNT_PATHWAY_REQUIRE_MYC	0.222128	2.02198	0.0108136
MIKKELSEN_NPC_LCP_WITH_H3K4ME3	0.235931	2.02159	0.0108453
LI_AMPLIFIED_IN_LUNG_CANCER	0.133919	2.02158	0.0108388
SMID_BREAST_CANCER_BASAL_DN	0.0697626	2.01934	0.0109732
EHRLICH_ICF_SYNDROM_UP	0.501585	2.01817	0.0110469
AMIT_EGF_RESPONSE_240_HELA	0.222393	2.0167	0.0111245
MARKS_HDAC_TARGETS_DN	0.43352	2.01668	0.0111167
BIOCARTA_NKCELLS_PATHWAY	0.379889	2.0166	0.0111155
CHUNG_BLISTER_CYTOTOXICITY_UP	0.158214	2.01622	0.0111315
BIOCARTA_ACTINY_PATHWAY	0.379144	2.01578	0.0111529
MCGARVEY_SILENCED_BY_METHYLATION_IN_COLON_CANCER	0.271429	2.01547	0.0111624
LIANG_HEMATOPOIESIS_STEM_CELL_NUMBER_LARGE_VS_TINY_UP	0.260407	2.01461	0.011228
KEGG_GAP_JUNCTION	0.182229	2.01239	0.0113708
TORCHIA_TARGETS_OF_EWSR1_FLI1_FUSION_TOP20_DN	0.400285	2.00999	0.0115199
LI_CISPLATIN_RESISTANCE_UP	0.335695	2.00947	0.0115495
MARTINELLI_IMMATURE_NEUTROPHIL_DN	0.472743	2.00928	0.0115555
YAMAZAKI_TCEB3_TARGETS_UP	0.1335	2.00914	0.0115658
KEGG_CELL_CYCLE	0.151954	2.00901	0.0115697
BIOCARTA_IL2RB_PATHWAY	0.275293	2.00886	0.011566
LEE_SP4_THYMOCYTE	0.464168	2.00842	0.0115934
BIOCARTA_BCR_PATHWAY	0.292726	2.00811	0.011596
HERNANDEZ_MITOTIC_ARREST_BY_DOCETAXEL_1_UP	0.304444	2.00811	0.011588
ROETH_TERT_TARGETS_UP	0.450736	2.00621	0.0117126
REACTOME_NEF_MEDIATES_DOWN_MODULATION_OF_CELL_SURFACE_RECEPTORS_BY_RECRUITING_THEM_TO_CLATHRIN_ADAPTERS	0.378963	2.00476	0.0117966
SEKI_INFLAMMATORY_RESPONSE_LPS_DN	0.375138	2.00299	0.0119123
WORSCHECH_TUMOR_EVASION_AND_TOLEROGENICITY_DN	0.436763	2.00296	0.0119062
ZHANG_ANTIVIRAL_RESPONSE_TO_RIBAVIRIN_DN	0.239546	2.0016	0.0120168
ZWANG_TRANSIENTLY_UP_BY_1ST_EGF_PULSE_ONLY	0.0456728	2.00054	0.0120852
GRAHAM_CML_QUIESCENT_VS_NORMAL_DIVIDING_DN	0.509582	2.0003	0.0120929
CREIGHTON_AKT1_SIGNALING_VIA_MTOR_DN	0.352778	1.9995	0.0121411
ZIRN_TRETINOIN_RESPONSE_WT1_UP	0.355768	1.99908	0.012169
REACTOME_CHYLOMICRON_MEDIATED_LIPID_TRANSPORT	0.42307	1.99796	0.0122493
ST_T_CELL_SIGNAL_TRANSDUCTION	0.256678	1.99794	0.012242
SUMI_HNF4A_TARGETS	0.307745	1.99789	0.012241
BAKER_HEMATOPOIESIS_STAT3_TARGETS	0.408786	1.99762	0.0122507
REACTOME_RAS_ACTIVATION_UOPN_CA2_INFUX_THROUGH_NMDA_RECEPTOR	0.399614	1.99747	0.0122465
DARWICHE_PAPILLOMA_RISK_HIGH_UP	0.145528	1.99655	0.0122963
ZHANG_TLX_TARGETS_DN	0.180523	1.99622	0.012306
NIELSEN_GIST_VS_SYNOVIAL_SARCOMA_DN	0.388171	1.99482	0.0124003
PID_RAC1_REG_PATHWAY	0.274757	1.99359	0.012468
RORIE_TARGETS_OF_EWSR1_FLI1_FUSION_UP	0.304544	1.99322	0.0124848
VALK_AML_CLUSTER_10	0.309169	1.99321	0.0124763
BIOCARTA_GCR_PATHWAY	0.391902	1.99249	0.0125209
COULOUARN_TEMPORAL_TGFB1_SIGNATURE_UP	0.165577	1.99147	0.0125915
LANDIS_ERBB2_BREAST_PRENEOPLASTIC_UP	0.385256	1.99111	0.0126063
DELACROIX_RAR_TARGETS_UP	0.249723	1.99043	0.0126376
LIM_MAMMARY_LUMINAL_MATURE_UP	0.161626	1.98984	0.0126795
HOLLERN_MICROACINAR_BREAST_TUMOR_DN	0.460539	1.98906	0.0127255
REACTOME_CELL_CYCLE_CHECKPOINTS	0.164256	1.98828	0.0127641
KAMMINGA_EZH2_TARGETS	0.263402	1.98824	0.0127566
BIOCARTA_P35ALZHEIMERS_PATHWAY	0.507867	1.98772	0.0127837
GEORGES_CELL_CYCLE_MIR192_TARGETS	0.2177	1.98651	0.0128757
OZANNE_AP1_TARGETS_UP	0.428071	1.98645	0.0128744
DARWICHE_SQUAMOUS_CELL_CARCINOMA_UP	0.147748	1.98641	0.0128698
HOFFMANN_PRE_BI_TO_LARGE_PRE_BII_LYMPHOCYTE_UP	0.2759	1.98641	0.0128612
TRAYNOR_RETT_SYNDROM_DN	0.397042	1.985	0.0129478
BROWNE_HCMV_INFECTION_30MIN_UP	0.235316	1.98494	0.0129453
PID_NECTIN_PATHWAY	0.311169	1.98484	0.0129429
YAUCH_HEDGEHOG_SIGNALING_PARACRINE_UP	0.144349	1.9841	0.0129926
PID_AURORA_A_PATHWAY	0.308448	1.98375	0.0130079
SANA_RESPONSE_TO_IFNG_DN	0.186349	1.98167	0.0131504
REACTOME_BASIGIN_INTERACTIONS	0.334763	1.97981	0.0132769
PID_RAS_PATHWAY	0.301151	1.97961	0.0132868
REACTOME_SIGNALING_BY_RHO_GTPASES	0.161852	1.97934	0.0133028
COLIN_PILOCYTIC_ASTROCYTOMA_VS_GLIOBLASTOMA_DN	0.313231	1.97929	0.0132971
PLASARI_TGFB1_SIGNALING_VIA_NFIC_1HR_UP	0.292327	1.97791	0.0133953
GRAHAM_CML_QUIESCENT_VS_CML_DIVIDING_UP	0.353593	1.97765	0.0134082
VALK_AML_CLUSTER_6	0.293388	1.97729	0.0134252
KEGG_OOCYTE_MEIOSIS	0.162822	1.97657	0.0134638
MIKKELSEN_MEF_LCP_WITH_H3K27ME3	0.211313	1.97519	0.013569
TRACEY_RESISTANCE_TO_IFNA2_DN	0.313105	1.97422	0.0136396
BHAT_ESR1_TARGETS_NOT_VIA_AKT1_UP	0.118237	1.9741	0.0136438
KEGG_FC_EPSILON_RI_SIGNALING_PATHWAY	0.191419	1.97248	0.0137756
ZHU_CMV_24_HR_UP	0.174992	1.97169	0.0138313
HWANG_PROSTATE_CANCER_MARKERS	0.316024	1.97151	0.0138386
MCDOWELL_ACUTE_LUNG_INJURY_DN	0.243023	1.97126	0.0138522
ZHOU_PANCREATIC_ENDOCRINE_PROGENITOR	0.437318	1.97107	0.0138565
TSUNODA_CISPLATIN_RESISTANCE_UP	0.445571	1.97044	0.013899
WHITFIELD_CELL_CYCLE_M_G1	0.143235	1.96937	0.0139754
PID_ERBB1_DOWNSTREAM_PATHWAY	0.16236	1.96935	0.0139672
PLASARI_TGFB1_SIGNALING_VIA_NFIC_10HR_DN	0.300465	1.96856	0.0140382
HU_GENOTOXIC_DAMAGE_4HR	0.289484	1.96703	0.0141494
SU_KIDNEY	0.430663	1.9667	0.0141699
COATES_MACROPHAGE_M1_VS_M2_DN	0.194536	1.96622	0.0141965
REACTOME_NUCLEOTIDE_LIKE_PURINERGIC_RECEPTORS	0.422431	1.96394	0.0144018
KORKOLA_EMBRYONIC_CARCINOMA_VS_SEMINOMA_DN	0.338752	1.96272	0.0144845
REACTOME_SIGNALING_BY_THE_B_CELL_RECEPTOR_BCR	0.149906	1.96267	0.0144791
TONKS_TARGETS_OF_RUNX1_RUNX1T1_FUSION_GRANULOCYTE_DN	0.407748	1.96165	0.0145484
PHONG_TNF_TARGETS_UP	0.213326	1.95952	0.0147251
MARSON_FOXP3_TARGETS_STIMULATED_UP	0.309711	1.95892	0.0147707
SWEET_KRAS_ONCOGENIC_SIGNATURE	0.173764	1.95837	0.0148019
MATZUK_IMPLANTATION_AND_UTERINE	0.356835	1.95712	0.0148977
SHIPP_DLBCL_CURED_VS_FATAL_UP	0.262567	1.95613	0.0149785
PID_TCR_CALCIUM_PATHWAY	0.321117	1.95479	0.0150739
REACTOME_BIOLOGICAL_OXIDATIONS	0.141963	1.95292	0.0152168
MCBRYAN_TERMINAL_END_BUD_UP	0.464402	1.95236	0.0152599
REACTOME_TRANSPORT_OF_GLUCOSE_AND_OTHER_SUGARS_BILE_SALTS_AND_ORGANIC_ACIDS_METAL_IONS_AND_AMINE_COMPOUNDS	0.180765	1.94865	0.0155718
MODY_HIPPOCAMPUS_POSTNATAL	0.214438	1.94747	0.0156643
REACTOME_CROSS_PRESENTATION_OF_SOLUBLE_EXOGENOUS_ANTIGENS_ENDOSOMES	0.242743	1.94743	0.0156561
DEBIASI_APOPTOSIS_BY_REOVIRUS_INFECTION_UP	0.0943029	1.94695	0.0156865
KORKOLA_TERATOMA_UP	0.412553	1.94641	0.0157219
MULLIGHAN_NPM1_SIGNATURE_3_UP	0.0944351	1.94512	0.0158182
VALK_AML_WITH_EVI1	0.352107	1.94464	0.0158504
KENNY_CTNNB1_TARGETS_UP	0.239814	1.94176	0.0160675
BENPORATH_ES_CORE_NINE_CORRELATED	0.164369	1.9416	0.0160702
SHIPP_DLBCL_VS_FOLLICULAR_LYMPHOMA_UP	0.253558	1.94124	0.016099
REACTOME_INNATE_IMMUNE_SYSTEM	0.102956	1.94007	0.0161805
REACTOME_L1CAM_INTERACTIONS	0.182679	1.93968	0.0162126
ZHANG_BREAST_CANCER_PROGENITORS_UP	0.0839531	1.93841	0.0163231
OSADA_ASCL1_TARGETS_UP	0.241669	1.9383	0.0163247
YAO_TEMPORAL_RESPONSE_TO_PROGESTERONE_CLUSTER_5	0.312477	1.93796	0.0163476
VERRECCHIA_RESPONSE_TO_TGFB1_C1	0.374857	1.93697	0.0164246
BIOCARTA_GPCR_PATHWAY	0.27867	1.93681	0.0164312
ROSS_AML_OF_FAB_M7_TYPE	0.203146	1.93591	0.0165058
GEORGES_TARGETS_OF_MIR192_AND_MIR215	0.0594522	1.93545	0.0165315
MULLIGHAN_MLL_SIGNATURE_1_DN	0.111416	1.93108	0.0169571
REACTOME_HIV_INFECTION	0.122454	1.93079	0.0169772
HUMMERICH_MALIGNANT_SKIN_TUMOR_UP	0.434177	1.93013	0.0170143
PID_ANTHRAX_PATHWAY	0.386217	1.92878	0.0171549
NIELSEN_LEIOMYOSARCOMA_CNN1_DN	0.354687	1.92859	0.0171609
HALMOS_CEBPA_TARGETS_UP	0.228904	1.92822	0.017189
EPPERT_PROGENITOR	0.144236	1.92817	0.0171849
KEGG_PROTEASOME	0.248852	1.92669	0.0173203
BROWNE_HCMV_INFECTION_6HR_UP	0.196635	1.92662	0.0173151
LUI_THYROID_CANCER_CLUSTER_4	0.451395	1.92629	0.0173331
KANG_GLIS3_TARGETS	0.270217	1.92626	0.0173229
REACTOME_ACTIVATION_OF_BH3_ONLY_PROTEINS	0.397404	1.92583	0.0173529
CREIGHTON_ENDOCRINE_THERAPY_RESISTANCE_5	0.0797313	1.92519	0.0174122
BENPORATH_OCT4_TARGETS	0.099112	1.92487	0.0174288
VALK_AML_CLUSTER_15	0.296721	1.92429	0.0174804
REACTOME_KINESINS	0.321498	1.9241	0.0174851
KEGG_LINOLEIC_ACID_METABOLISM	0.299994	1.9239	0.0174868
PUJANA_BREAST_CANCER_WITH_BRCA1_MUTATED_UP	0.219927	1.9235	0.0175065
RADMACHER_AML_PROGNOSIS	0.191577	1.92219	0.0176106
KEGG_ENDOCYTOSIS	0.122851	1.92154	0.017662
MARTORIATI_MDM4_TARGETS_FETAL_LIVER_DN	0.0749978	1.9208	0.0177292
BIOCARTA_G1_PATHWAY	0.307179	1.92053	0.0177457
REACTOME_DEPOSITION_OF_NEW_CENPA_CONTAINING_NUCLEOSOMES_AT_THE_CENTROMERE	0.262484	1.91823	0.0179736
ROESSLER_LIVER_CANCER_METASTASIS_UP	0.16283	1.91781	0.0180107
LE_EGR2_TARGETS_DN	0.158153	1.91713	0.0180753
FISCHER_G1_S_CELL_CYCLE	0.121511	1.91608	0.0181767
VALK_AML_CLUSTER_13	0.307015	1.91436	0.0183618
KEGG_ASCORBATE_AND_ALDARATE_METABOLISM	0.346235	1.91199	0.0186043
KARLSSON_TGFB1_TARGETS_DN	0.117061	1.91192	0.0185974
ABBUD_LIF_SIGNALING_1_UP	0.241742	1.91064	0.0187287
MIKKELSEN_NPC_ICP_WITH_H3K4ME3	0.082449	1.91044	0.0187355
PID_TAP63_PATHWAY	0.223319	1.91044	0.0187236
REACTOME_ORC1_REMOVAL_FROM_CHROMATIN	0.202621	1.90885	0.0188811
LEE_METASTASIS_AND_ALTERNATIVE_SPLICING_UP	0.189199	1.90861	0.0188937
GAUSSMANN_MLL_AF4_FUSION_TARGETS_A_UP	0.120187	1.90802	0.0189526
REACTOME_CS_DS_DEGRADATION	0.464775	1.90745	0.0189985
VIETOR_IFRD1_TARGETS	0.328038	1.9069	0.019054
REACTOME_INHIBITION_OF_INSULIN_SECRETION_BY_ADRENALINE_NORADRENALINE	0.319009	1.90558	0.0191922
BARIS_THYROID_CANCER_DN	0.212666	1.90444	0.0193099
KEGG_ALPHA_LINOLENIC_ACID_METABOLISM	0.375303	1.90426	0.0193154
YEGNASUBRAMANIAN_PROSTATE_CANCER	0.151464	1.90419	0.0193091
COLIN_PILOCYTIC_ASTROCYTOMA_VS_GLIOBLASTOMA_UP	0.267391	1.90246	0.0194808
AMIT_EGF_RESPONSE_480_MCF10A	0.245879	1.90166	0.0195694
KEGG_GLYCOSAMINOGLYCAN_DEGRADATION	0.347098	1.89802	0.0199738
KEGG_PRION_DISEASES	0.270218	1.89767	0.0199927
LE_NEURONAL_DIFFERENTIATION_UP	0.374574	1.89757	0.0199889
DAZARD_UV_RESPONSE_CLUSTER_G28	0.372539	1.89753	0.0199832
KANNAN_TP53_TARGETS_UP	0.219363	1.89746	0.0199775
JIANG_VHL_TARGETS	0.141603	1.89622	0.0200947
PID_ERBB1_RECEPTOR_PROXIMAL_PATHWAY	0.269544	1.89621	0.020083
SMID_BREAST_CANCER_LUMINAL_A_UP	0.178251	1.89596	0.0201086
JACKSON_DNMT1_TARGETS_DN	0.325653	1.89518	0.0201729
BALDWIN_PRKCI_TARGETS_UP	0.271252	1.89487	0.0201894
ZHU_SKIL_TARGETS_UP	0.354133	1.89482	0.0201826
REACTOME_E2F_MEDIATED_REGULATION_OF_DNA_REPLICATION	0.277529	1.89417	0.0202478
HOFMANN_MYELODYSPLASTIC_SYNDROM_HIGH_RISK_DN	0.353856	1.89377	0.0202856
COATES_MACROPHAGE_M1_VS_M2_UP	0.18714	1.89373	0.0202778
ZHAN_MULTIPLE_MYELOMA_CD1_AND_CD2_DN	0.235974	1.89369	0.0202681
LIANG_HEMATOPOIESIS_STEM_CELL_NUMBER_QTL	0.392346	1.89281	0.0203652
REACTOME_N_GLYCAN_ANTENNAE_ELONGATION	0.427978	1.89211	0.0204503
SHIN_B_CELL_LYMPHOMA_CLUSTER_1	0.447863	1.89078	0.0205905
REACTOME_ADHERENS_JUNCTIONS_INTERACTIONS	0.306269	1.88929	0.0207427
BIOCARTA_FCER1_PATHWAY	0.258189	1.88832	0.0208438
JI_RESPONSE_TO_FSH_UP	0.189481	1.88809	0.0208637
REACTOME_GPVI_MEDIATED_ACTIVATION_CASCADE	0.2912	1.8874	0.0209483
CHEOK_RESPONSE_TO_MERCAPTOPURINE_DN	0.347111	1.88698	0.0209854
BLALOCK_ALZHEIMERS_DISEASE_UP	0.0429912	1.8868	0.0209858
KEGG_GLYCOSPHINGOLIPID_BIOSYNTHESIS_GANGLIO_SERIES	0.397199	1.88591	0.0210694
MATTHEWS_AP1_TARGETS	0.371451	1.88471	0.0212334
DORN_ADENOVIRUS_INFECTION_32HR_DN	0.25317	1.88464	0.0212299
PEDRIOLI_MIR31_TARGETS_UP	0.115378	1.88446	0.0212303
PROVENZANI_METASTASIS_UP	0.118426	1.88398	0.0212814
REACTOME_IL_RECEPTOR_SHC_SIGNALING	0.307755	1.88376	0.0212903
HUTTMANN_B_CLL_POOR_SURVIVAL_DN	0.214926	1.88321	0.0213501
VANTVEER_BREAST_CANCER_BRCA1_DN	0.248216	1.8822	0.0214607
MARTINEZ_RB1_TARGETS_DN	0.0726123	1.88147	0.0215378
PID_HIF1_TFPATHWAY	0.193687	1.88129	0.0215523
LEE_AGING_MUSCLE_DN	0.243927	1.88064	0.0216203
ZHAN_EARLY_DIFFERENTIATION_GENES_DN	0.251751	1.87891	0.0218242
REACTOME_FGFR4_LIGAND_BINDING_AND_ACTIVATION	0.449407	1.87837	0.0218721
REACTOME_M_G1_TRANSITION	0.183229	1.87816	0.021891
DOANE_RESPONSE_TO_ANDROGEN_UP	0.123629	1.87805	0.0218861
SLEBOS_HEAD_AND_NECK_CANCER_WITH_HPV_UP	0.176515	1.87801	0.0218756
PID_IL3_PATHWAY	0.307755	1.87798	0.021865
GUTIERREZ_WALDENSTROEMS_MACROGLOBULINEMIA_2	0.429484	1.87754	0.0219013
REACTOME_PHOSPHOLIPASE_C_MEDIATED_CASCADE	0.217961	1.87686	0.0219739
REACTOME_G_ALPHA_S_SIGNALLING_EVENTS	0.14406	1.87653	0.0220071
ALONSO_METASTASIS_NEURAL_UP	0.368469	1.87643	0.022011
BROWNE_HCMV_INFECTION_12HR_DN	0.162507	1.8764	0.0220023
RIZKI_TUMOR_INVASIVENESS_3D_DN	0.101596	1.87546	0.0221114
PLASARI_TGFB1_TARGETS_1HR_UP	0.271895	1.87532	0.022115
PID_LYMPH_ANGIOGENESIS_PATHWAY	0.312831	1.87498	0.0221434
YIH_RESPONSE_TO_ARSENITE_C2	0.371061	1.8745	0.0221866
ZHAN_MULTIPLE_MYELOMA_CD1_VS_CD2_DN	0.230462	1.8744	0.0221834
REACTOME_FGFR2C_LIGAND_BINDING_AND_ACTIVATION	0.449407	1.87386	0.0222336
BYSTRYKH_HEMATOPOIESIS_STEM_CELL_QTL_CIS	0.154937	1.87385	0.02222
PID_SYNDECAN_3_PATHWAY	0.391747	1.87345	0.0222548
GEISS_RESPONSE_TO_DSRNA_UP	0.259009	1.87268	0.0223275
BERENJENO_ROCK_SIGNALING_NOT_VIA_RHOA_UP	0.302612	1.87267	0.0223139
BIOCARTA_IL12_PATHWAY	0.347509	1.87248	0.0223229
AFFAR_YY1_TARGETS_UP	0.112122	1.87174	0.0224181
REACTOME_RECYCLING_PATHWAY_OF_L1	0.306893	1.87157	0.0224242
KEGG_HEDGEHOG_SIGNALING_PATHWAY	0.215605	1.87151	0.0224153
BIOCARTA_PTDINS_PATHWAY	0.324113	1.87135	0.0224214
PLASARI_NFIC_TARGETS_BASAL_DN	0.364049	1.8709	0.0224692
PID_P73PATHWAY	0.178061	1.86914	0.0227043
KEGG_STEROID_HORMONE_BIOSYNTHESIS	0.224425	1.86828	0.0227856
JIANG_AGING_HYPOTHALAMUS_DN	0.251237	1.86756	0.0228986
CHIN_BREAST_CANCER_COPY_NUMBER_UP	0.310254	1.8673	0.0229092
REACTOME_APC_C_CDC20_MEDIATED_DEGRADATION_OF_MITOTIC_PROTEINS	0.20118	1.86694	0.0229424
MIKKELSEN_ES_ICP_WITH_H3K4ME3	0.0649301	1.86563	0.0231072
BERENJENO_TRANSFORMED_BY_RHOA_REVERSIBLY_DN	0.288809	1.86428	0.0232442
LEE_CALORIE_RESTRICTION_NEOCORTEX_UP	0.176627	1.86414	0.0232461
MANTOVANI_NFKB_TARGETS_UP	0.242309	1.86413	0.023233
POMEROY_MEDULLOBLASTOMA_DESMOPLASIC_VS_CLASSIC_UP	0.200948	1.86401	0.0232369
BECKER_TAMOXIFEN_RESISTANCE_DN	0.226824	1.86331	0.0233099
LEIN_ASTROCYTE_MARKERS	0.247822	1.86313	0.0233136
REACTOME_TRAFFICKING_AND_PROCESSING_OF_ENDOSOMAL_TLR	0.461437	1.86026	0.0236587
DORMOY_ELAVL1_TARGETS	0.402687	1.8594	0.0237603
MYLLYKANGAS_AMPLIFICATION_HOT_SPOT_24	0.424336	1.85901	0.0237992
REACTOME_SIGNAL_TRANSDUCTION_BY_L1	0.26342	1.85797	0.0239268
BIOCARTA_CXCR4_PATHWAY	0.319545	1.85774	0.0239358
MUELLER_PLURINET	0.0948865	1.85695	0.024038
DAVICIONI_RHABDOMYOSARCOMA_PAX_FOXO1_FUSION_DN	0.404711	1.85666	0.0240606
PID_PTP1B_PATHWAY	0.216631	1.85577	0.0241627
ZHENG_FOXP3_TARGETS_IN_THYMUS_UP	0.118996	1.85378	0.0244027
SA_REG_CASCADE_OF_CYCLIN_EXPR	0.420847	1.85221	0.0246016
STAMBOLSKY_RESPONSE_TO_VITAMIN_D3_UP	0.181382	1.85186	0.024637
KEGG_PENTOSE_AND_GLUCURONATE_INTERCONVERSIONS	0.321333	1.84885	0.0250326
REACTOME_MITOTIC_PROMETAPHASE	0.173503	1.84805	0.0251376
PID_MAPK_TRK_PATHWAY	0.261881	1.84777	0.0251532
GENTILE_UV_LOW_DOSE_DN	0.197496	1.84684	0.0252786
LEIN_LOCALIZED_TO_PROXIMAL_DENDRITES	0.258701	1.84675	0.0252728
LE_NEURONAL_DIFFERENTIATION_DN	0.350768	1.84654	0.0252837
GOBERT_OLIGODENDROCYTE_DIFFERENTIATION_DN	0.0506295	1.84643	0.0252771
JAZAERI_BREAST_CANCER_BRCA1_VS_BRCA2_UP	0.225504	1.84643	0.025262
PID_IL2_1PATHWAY	0.209956	1.84622	0.0252748
PID_E2F_PATHWAY	0.18527	1.84493	0.0254509
LA_MEN1_TARGETS	0.316082	1.84448	0.025502
RIZ_ERYTHROID_DIFFERENTIATION_6HR	0.254771	1.84363	0.0256124
OSWALD_HEMATOPOIETIC_STEM_CELL_IN_COLLAGEN_GEL_UP	0.106924	1.84333	0.0256315
HAHTOLA_CTCL_CUTANEOUS	0.306938	1.84319	0.0256384
REACTOME_LIPID_DIGESTION_MOBILIZATION_AND_TRANSPORT	0.234918	1.84102	0.0259103
REACTOME_RETROGRADE_NEUROTROPHIN_SIGNALLING	0.422145	1.84092	0.0259097
ZEMBUTSU_SENSITIVITY_TO_CYCLOPHOSPHAMIDE	0.357762	1.84065	0.0259423
GROSS_HYPOXIA_VIA_ELK3_ONLY_UP	0.269227	1.84043	0.0259657
BILBAN_B_CLL_LPL_UP	0.200673	1.83937	0.0261247
GRAHAM_CML_DIVIDING_VS_NORMAL_DIVIDING_UP	0.432922	1.83827	0.0262714
GAUSSMANN_MLL_AF4_FUSION_TARGETS_F_DN	0.277992	1.83817	0.0262715
DEURIG_T_CELL_PROLYMPHOCYTIC_LEUKEMIA_DN	0.0925831	1.83756	0.0263439
POMEROY_MEDULLOBLASTOMA_DESMOPLASIC_VS_CLASSIC_DN	0.207347	1.83659	0.0264741
ALCALA_APOPTOSIS	0.167755	1.83655	0.0264649
PEREZ_TP53_TARGETS	0.0497219	1.83653	0.026453
PID_CMYB_PATHWAY	0.171789	1.83611	0.0264867
HUTTMANN_B_CLL_POOR_SURVIVAL_UP	0.0998298	1.83499	0.0266232
KEGG_APOPTOSIS	0.168377	1.83371	0.0267928
GOUYER_TATI_TARGETS_DN	0.382282	1.83092	0.0272326
MCCOLLUM_GELDANAMYCIN_RESISTANCE_UP	0.471777	1.83032	0.0273122
SHIN_B_CELL_LYMPHOMA_CLUSTER_5	0.368503	1.83029	0.0272998
WATANABE_RECTAL_CANCER_RADIOTHERAPY_RESPONSIVE_DN	0.166049	1.83012	0.0273129
KEGG_BASAL_CELL_CARCINOMA	0.209717	1.8297	0.02735
DAZARD_UV_RESPONSE_CLUSTER_G1	0.19506	1.82926	0.0273906
MCCLUNG_DELTA_FOSB_TARGETS_8WK	0.226552	1.82907	0.0274026
REACTOME_NETRIN1_SIGNALING	0.253635	1.82852	0.0274805
BIOCARTA_GSK3_PATHWAY	0.296415	1.82776	0.0275761
MARTINEZ_RESPONSE_TO_TRABECTEDIN	0.220306	1.82755	0.0275881
BIOCARTA_UCALPAIN_PATHWAY	0.362357	1.82656	0.0277199
VICENT_METASTASIS_UP	0.409047	1.82634	0.0277372
AUJLA_IL22_AND_IL17A_SIGNALING	0.476057	1.82606	0.0277617
MOOTHA_GLYCOLYSIS	0.343354	1.82432	0.0280292
MCBRYAN_PUBERTAL_BREAST_5_6WK_UP	0.143297	1.82381	0.02809
NIELSEN_LIPOSARCOMA_UP	0.354641	1.82352	0.0281162
DAZARD_UV_RESPONSE_CLUSTER_G2	0.288386	1.82291	0.0281905
NADLER_HYPERGLYCEMIA_AT_OBESITY	0.206355	1.82182	0.0283369
GUO_TARGETS_OF_IRS1_AND_IRS2	0.164207	1.81896	0.028783
BOYAULT_LIVER_CANCER_SUBCLASS_G56_DN	0.373011	1.8188	0.0287834
DANG_MYC_TARGETS_DN	0.283261	1.81812	0.0288833
RASHI_RESPONSE_TO_IONIZING_RADIATION_1	0.23583	1.81751	0.0289605
KEGG_WNT_SIGNALING_PATHWAY	0.125278	1.8173	0.0289781
LI_ADIPOGENESIS_BY_ACTIVATED_PPARG	0.363955	1.81585	0.0291916
AKL_HTLV1_INFECTION_DN	0.193582	1.81493	0.0293307
SCHURINGA_STAT5A_TARGETS_DN	0.401243	1.81478	0.0293496
DAVICIONI_TARGETS_OF_PAX_FOXO1_FUSIONS_DN	0.188578	1.81384	0.029479
MIKKELSEN_MEF_HCP_WITH_H3_UNMETHYLATED	0.108512	1.81263	0.0296642
PID_KIT_PATHWAY	0.216631	1.81217	0.029716
BANDRES_RESPONSE_TO_CARMUSTIN_MGMT_48HR_DN	0.125162	1.80966	0.0300875
ZHAN_V1_LATE_DIFFERENTIATION_GENES_DN	0.401456	1.80955	0.0300827
YAO_TEMPORAL_RESPONSE_TO_PROGESTERONE_CLUSTER_6	0.181395	1.80795	0.0303113
GROSS_HYPOXIA_VIA_ELK3_AND_HIF1A_DN	0.156346	1.80746	0.0303664
KEGG_NOD_LIKE_RECEPTOR_SIGNALING_PATHWAY	0.193634	1.80378	0.0309779
SATO_SILENCED_BY_DEACETYLATION_IN_PANCREATIC_CANCER	0.226196	1.80378	0.030961
REACTOME_CYCLIN_E_ASSOCIATED_EVENTS_DURING_G1_S_TRANSITION_	0.199092	1.80373	0.0309504
YOSHIMURA_MAPK8_TARGETS_DN	0.0851054	1.80153	0.0312717
BIOCARTA_P27_PATHWAY	0.414151	1.80076	0.0313654
LUCAS_HNF4A_TARGETS_UP	0.203232	1.80035	0.0314098
LUI_THYROID_CANCER_CLUSTER_5	0.413074	1.80015	0.0314185
TAVAZOIE_METASTASIS	0.153778	1.80004	0.0314138
NAKAYAMA_FGF2_TARGETS	0.280891	1.7987	0.0316295
ZHAN_MULTIPLE_MYELOMA_CD1_DN	0.241663	1.7983	0.0316772
HAHTOLA_MYCOSIS_FUNGOIDES_SKIN_DN	0.292783	1.79804	0.0316982
REACTOME_SEROTONIN_RECEPTORS	0.436826	1.798	0.031688
NAKAMURA_TUMOR_ZONE_PERIPHERAL_VS_CENTRAL_DN	0.0654181	1.79705	0.0318359
GAJATE_RESPONSE_TO_TRABECTEDIN_UP	0.19453	1.79682	0.0318577
VANASSE_BCL2_TARGETS_DN	0.183234	1.79596	0.0319774
KEGG_RENIN_ANGIOTENSIN_SYSTEM	0.363444	1.79495	0.0321475
STAMBOLSKY_TARGETS_OF_MUTATED_TP53_DN	0.224359	1.79407	0.0322984
FOURNIER_ACINAR_DEVELOPMENT_LATE_UP	0.446197	1.79391	0.0323066
GRAHAM_CML_QUIESCENT_VS_CML_DIVIDING_DN	0.447475	1.79362	0.0323371
REACTOME_TRANSPORT_OF_INORGANIC_CATIONS_ANIONS_AND_AMINO_ACIDS_OLIGOPEPTIDES	0.159299	1.79324	0.0323833
REACTOME_OTHER_SEMAPHORIN_INTERACTIONS	0.378769	1.79322	0.0323666
VALK_AML_CLUSTER_12	0.281795	1.793	0.0323864
MATTIOLI_MULTIPLE_MYELOMA_WITH_14Q32_TRANSLOCATIONS	0.264414	1.79253	0.0324431
PID_ATF2_PATHWAY	0.199298	1.79068	0.0327336
ENGELMANN_CANCER_PROGENITORS_DN	0.186362	1.79056	0.0327441
YAMASHITA_LIVER_CANCER_STEM_CELL_UP	0.218298	1.79045	0.0327442
HOFFMANN_SMALL_PRE_BII_TO_IMMATURE_B_LYMPHOCYTE_UP	0.179193	1.79045	0.0327265
REACTOME_HDL_MEDIATED_LIPID_TRANSPORT	0.379888	1.78911	0.0329303
REACTOME_INTEGRIN_ALPHAIIB_BETA3_SIGNALING	0.289976	1.78871	0.0329812
CREIGHTON_AKT1_SIGNALING_VIA_MTOR_UP	0.259784	1.78793	0.0330844
REACTOME_HOST_INTERACTIONS_OF_HIV_FACTORS	0.140904	1.78774	0.0331036
BASSO_B_LYMPHOCYTE_NETWORK	0.131068	1.78739	0.0331465
KYNG_WERNER_SYNDROM_AND_NORMAL_AGING_DN	0.106992	1.78715	0.0331734
HU_ANGIOGENESIS_UP	0.341241	1.78529	0.0335045
TONKS_TARGETS_OF_RUNX1_RUNX1T1_FUSION_SUSTAINED_IN_GRANULOCYTE_UP	0.384577	1.78499	0.0335329
SCHAEFFER_PROSTATE_DEVELOPMENT_6HR_UP	0.123219	1.78433	0.0336415
KIM_ALL_DISORDERS_DURATION_CORR_DN	0.127264	1.78389	0.033705
BIOCARTA_NFAT_PATHWAY	0.209566	1.78281	0.0338779
KIM_WT1_TARGETS_12HR_DN	0.109928	1.78281	0.0338605
CHANG_POU5F1_TARGETS_UP	0.383302	1.78269	0.0338642
MODY_HIPPOCAMPUS_NEONATAL	0.257227	1.78227	0.0339247
MATTHEWS_SKIN_CARCINOGENESIS_VIA_JUN	0.383185	1.78195	0.0339415
KEGG_AMYOTROPHIC_LATERAL_SCLEROSIS_ALS	0.20942	1.78083	0.0341373
IVANOVA_HEMATOPOIESIS_MATURE_CELL	0.0921208	1.78026	0.0342187
ST_B_CELL_ANTIGEN_RECEPTOR	0.237124	1.78015	0.034217
REACTOME_P75_NTR_RECEPTOR_MEDIATED_SIGNALLING	0.173806	1.7801	0.0342047
JAATINEN_HEMATOPOIETIC_STEM_CELL_UP	0.0916335	1.77981	0.0342319
KANG_FLUOROURACIL_RESISTANCE_DN	0.368384	1.77954	0.0342587
SESTO_RESPONSE_TO_UV_C3	0.345033	1.77911	0.0343241
GRAHAM_CML_QUIESCENT_VS_NORMAL_DIVIDING_UP	0.207604	1.77859	0.0343997
MCBRYAN_PUBERTAL_BREAST_6_7WK_UP	0.111705	1.77815	0.0344621
GROSS_HYPOXIA_VIA_ELK3_AND_HIF1A_UP	0.12984	1.77791	0.0344898
BURTON_ADIPOGENESIS_PEAK_AT_8HR	0.236438	1.77748	0.0345541
PID_REELIN_PATHWAY	0.278796	1.77727	0.0345799
LANDIS_ERBB2_BREAST_TUMORS_324_DN	0.129009	1.77714	0.0345831
REACTOME_TERMINATION_OF_O_GLYCAN_BIOSYNTHESIS	0.33985	1.77676	0.034627
GAVIN_FOXP3_TARGETS_CLUSTER_T7	0.159466	1.77643	0.0346588
SIG_PIP3_SIGNALING_IN_B_LYMPHOCYTES	0.246612	1.77569	0.0347686
BIOCARTA_ERK5_PATHWAY	0.367949	1.77518	0.0348411
BIOCARTA_CHEMICAL_PATHWAY	0.315325	1.77448	0.0349462
ZHAN_MULTIPLE_MYELOMA_MF_UP	0.23161	1.77415	0.0349812
ST_INTEGRIN_SIGNALING_PATHWAY	0.167133	1.77373	0.0350354
REACTOME_TOLL_RECEPTOR_CASCADES	0.144299	1.77306	0.0351708
BIOCARTA_CELLCYCLE_PATHWAY	0.313098	1.76806	0.0360788
TENEDINI_MEGAKARYOCYTE_MARKERS	0.187423	1.76794	0.0360778
REACTOME_LIGAND_GATED_ION_CHANNEL_TRANSPORT	0.320832	1.76768	0.0360991
MORI_EMU_MYC_LYMPHOMA_BY_ONSET_TIME_UP	0.152014	1.76744	0.0361196
DAVICIONI_PAX_FOXO1_SIGNATURE_IN_ARMS_UP	0.197877	1.76732	0.036115
GAUSSMANN_MLL_AF4_FUSION_TARGETS_D_UP	0.247749	1.767	0.0361493
MCCLUNG_DELTA_FOSB_TARGETS_2WK	0.220357	1.76599	0.0363206
BIOCARTA_CALCINEURIN_PATHWAY	0.346238	1.76594	0.0363143
DORN_ADENOVIRUS_INFECTION_12HR_UP	0.278188	1.76548	0.0363776
BURTON_ADIPOGENESIS_PEAK_AT_16HR	0.234901	1.76504	0.0364504
KOYAMA_SEMA3B_TARGETS_DN	0.0775774	1.7647	0.0365042
WANG_RESPONSE_TO_PACLITAXEL_VIA_MAPK8_UP	0.404539	1.76226	0.0368941
TONKS_TARGETS_OF_RUNX1_RUNX1T1_FUSION_SUSTAINED_IN_MONOCYTE_UP	0.324038	1.76209	0.036903
MULLIGHAN_NPM1_MUTATED_SIGNATURE_1_UP	0.0978652	1.76197	0.0369195
DAZARD_RESPONSE_TO_UV_SCC_UP	0.141856	1.7619	0.0369145
SIMBULAN_UV_RESPONSE_IMMORTALIZED_DN	0.266818	1.76064	0.0371251
DE_YY1_TARGETS_DN	0.156781	1.76059	0.0371098
HUMMERICH_SKIN_CANCER_PROGRESSION_DN	0.154444	1.76054	0.0371012
GENTLES_LEUKEMIC_STEM_CELL_UP	0.289435	1.7602	0.0371451
BOYLAN_MULTIPLE_MYELOMA_PCA3_DN	0.19044	1.75959	0.037242
KANG_CISPLATIN_RESISTANCE_UP	0.347345	1.75948	0.0372454
MOROSETTI_FACIOSCAPULOHUMERAL_MUSCULAR_DISTROPHY_DN	0.444959	1.75941	0.0372412
BIOCARTA_IL10_PATHWAY	0.351406	1.7593	0.0372413
MURAKAMI_UV_RESPONSE_1HR_DN	0.449824	1.75906	0.0372474
BIOCARTA_FMLP_PATHWAY	0.245595	1.75576	0.0378431
TAKAYAMA_BOUND_BY_AR	0.455659	1.75569	0.0378394
BROWNE_HCMV_INFECTION_4HR_UP	0.206167	1.75556	0.0378467
WANG_TUMOR_INVASIVENESS_DN	0.106869	1.75542	0.0378599
REACTOME_ASSEMBLY_OF_THE_PRE_REPLICATIVE_COMPLEX	0.189021	1.7554	0.0378442
LAMB_CCND1_TARGETS	0.33638	1.75335	0.0382464
IWANAGA_CARCINOGENESIS_BY_KRAS_UP	0.11895	1.75322	0.0382621
BIOCARTA_G2_PATHWAY	0.299249	1.75301	0.0382894
KEGG_EPITHELIAL_CELL_SIGNALING_IN_HELICOBACTER_PYLORI_INFECTION	0.187691	1.7527	0.0383254
KEGG_SMALL_CELL_LUNG_CANCER	0.164632	1.75181	0.0384753
GALLUZZI_PREVENT_MITOCHONDIAL_PERMEABILIZATION	0.310521	1.75084	0.0386392
STAEGE_EWING_FAMILY_TUMOR	0.261256	1.7502	0.03876
ST_WNT_CA2_CYCLIC_GMP_PATHWAY	0.319621	1.74942	0.0388945
NELSON_RESPONSE_TO_ANDROGEN_UP	0.16232	1.74811	0.0391571
KEGG_JAK_STAT_SIGNALING_PATHWAY	0.123428	1.74794	0.0391713
WATANABE_COLON_CANCER_MSI_VS_MSS_UP	0.280833	1.7468	0.0393604
CERVERA_SDHB_TARGETS_1_DN	0.249882	1.74617	0.0394681
MANALO_HYPOXIA_DN	0.0902893	1.74442	0.0398093
FONTAINE_PAPILLARY_THYROID_CARCINOMA_DN	0.178693	1.74417	0.0398511
SU_SALIVARY_GLAND	0.387433	1.74388	0.0399029
MIKKELSEN_PARTIALLY_REPROGRAMMED_TO_PLURIPOTENCY	0.450878	1.74332	0.0399819
PID_IL6_7_PATHWAY	0.218274	1.74152	0.04033
MARSON_FOXP3_TARGETS_DN	0.20221	1.7412	0.0403816
LANDIS_BREAST_CANCER_PROGRESSION_DN	0.176355	1.74047	0.0404972
REACTOME_CA_DEPENDENT_EVENTS	0.272419	1.73937	0.0407304
NOUZOVA_METHYLATED_IN_APL	0.193617	1.73867	0.0408625
REACTOME_LATENT_INFECTION_OF_HOMO_SAPIENS_WITH_MYCOBACTERIUM_TUBERCULOSIS	0.262551	1.73833	0.0409068
GENTILE_UV_RESPONSE_CLUSTER_D5	0.23594	1.73608	0.0413528
ABE_VEGFA_TARGETS_30MIN	0.275088	1.73601	0.041343
VERRECCHIA_RESPONSE_TO_TGFB1_C4	0.396357	1.73385	0.0417698
PID_AR_NONGENOMIC_PATHWAY	0.259885	1.73375	0.0417757
ZHANG_GATA6_TARGETS_DN	0.183997	1.73134	0.0422937
RIZ_ERYTHROID_DIFFERENTIATION	0.172152	1.72958	0.0426477
XU_CREBBP_TARGETS_DN	0.223137	1.72787	0.0430218
XU_HGF_SIGNALING_NOT_VIA_AKT1_48HR_DN	0.319408	1.72705	0.0431948
PID_WNT_SIGNALING_PATHWAY	0.276885	1.72605	0.0433942
REACTOME_SIGNALING_BY_ACTIVATED_POINT_MUTANTS_OF_FGFR1	0.419063	1.72565	0.0434639
DUTTA_APOPTOSIS_VIA_NFKB	0.257115	1.7252	0.0435325
PID_RET_PATHWAY	0.234537	1.72401	0.0437893
PAL_PRMT5_TARGETS_UP	0.106719	1.72335	0.0439164
CAVARD_LIVER_CANCER_MALIGNANT_VS_BENIGN	0.271893	1.72181	0.0442417
JEON_SMAD6_TARGETS_DN	0.327217	1.72176	0.0442321
GAZDA_DIAMOND_BLACKFAN_ANEMIA_PROGENITOR_UP	0.226194	1.72171	0.0442209
CUI_TCF21_TARGETS_DN	0.26056	1.72167	0.044203
KANG_AR_TARGETS_DN	0.333168	1.7211	0.0443027
HALMOS_CEBPA_TARGETS_DN	0.21664	1.72097	0.044308
YANG_MUC2_TARGETS_DUODENUM_6MO_UP	0.446024	1.71922	0.0446421
PID_AR_PATHWAY	0.192026	1.71843	0.0448188
GROSS_HYPOXIA_VIA_HIF1A_DN	0.144323	1.71578	0.0454329
DELYS_THYROID_CANCER_DN	0.100122	1.71552	0.0454717
HOLLERN_SOLID_NODULAR_BREAST_TUMOR_UP	0.429709	1.71548	0.0454582
REACTOME_PLATELET_AGGREGATION_PLUG_FORMATION	0.247888	1.71468	0.0456155
REACTOME_EXTRINSIC_PATHWAY_FOR_APOPTOSIS	0.393306	1.71451	0.0456336
GYORFFY_DOXORUBICIN_RESISTANCE	0.215453	1.71336	0.0458829
BOYAULT_LIVER_CANCER_SUBCLASS_G23_UP	0.207558	1.71332	0.0458659
LIN_NPAS4_TARGETS_UP	0.121596	1.71207	0.0461245
SHETH_LIVER_CANCER_VS_TXNIP_LOSS_PAM5	0.154031	1.71151	0.046228
KEGG_MELANOMA	0.174022	1.70999	0.0465435
ZHAN_MULTIPLE_MYELOMA_CD2_DN	0.215664	1.70944	0.0466309
HOFFMANN_SMALL_PRE_BII_TO_IMMATURE_B_LYMPHOCYTE_DN	0.20968	1.70896	0.0467185
GRANDVAUX_IRF3_TARGETS_DN	0.329533	1.70889	0.0467076
HERNANDEZ_MITOTIC_ARREST_BY_DOCETAXEL_1_DN	0.24342	1.70751	0.0469861
CHEN_LIVER_METABOLISM_QTL_CIS	0.149028	1.7074	0.0469934
MOOTHA_GLUCONEOGENESIS	0.262233	1.70729	0.0469924
OUILLETTE_CLL_13Q14_DELETION_DN	0.194984	1.70684	0.0470864
BRACHAT_RESPONSE_TO_METHOTREXATE_DN	0.273771	1.70651	0.0471487
LIM_MAMMARY_LUMINAL_PROGENITOR_DN	0.383361	1.70645	0.0471427
REACTOME_SEMA3A_PLEXIN_REPULSION_SIGNALING_BY_INHIBITING_INTEGRIN_ADHESION	0.391922	1.70479	0.0474815
ZHAN_LATE_DIFFERENTIATION_GENES_DN	0.358369	1.70439	0.0475633
BIOCARTA_INTRINSIC_PATHWAY	0.302446	1.70329	0.047814
SCHLOSSER_SERUM_RESPONSE_AUGMENTED_BY_MYC	0.146489	1.70283	0.0478862
HERNANDEZ_MITOTIC_ARREST_BY_DOCETAXEL_2_DN	0.337156	1.70267	0.0479053
JIANG_TIP30_TARGETS_DN	0.296125	1.70264	0.047889
WAMUNYOKOLI_OVARIAN_CANCER_LMP_DN	0.105736	1.70245	0.0479063
PETRETTO_BLOOD_PRESSURE_UP	0.426244	1.70243	0.0478891
PID_S1P_S1P4_PATHWAY	0.391051	1.70224	0.0479173
KYNG_DNA_DAMAGE_BY_4NQO_OR_UV	0.184512	1.70209	0.0479305
WU_HBX_TARGETS_1_DN	0.299965	1.70207	0.0479135
DORN_ADENOVIRUS_INFECTION_12HR_DN	0.258929	1.70171	0.0479699
JOSEPH_RESPONSE_TO_SODIUM_BUTYRATE_DN	0.178765	1.70012	0.0483257
WENG_POR_TARGETS_LIVER_DN	0.3234	1.69918	0.0485485
JI_METASTASIS_REPRESSED_BY_STK11	0.277411	1.69904	0.048554
WOTTON_RUNX_TARGETS_UP	0.309107	1.69882	0.0485873
JAZAG_TGFB1_SIGNALING_UP	0.138617	1.69876	0.0485764
KEGG_PANCREATIC_CANCER	0.172629	1.69876	0.0485509
REACTOME_SEMA3A_PAK_DEPENDENT_AXON_REPULSION	0.365046	1.69708	0.0489236
VERHAAK_GLIOBLASTOMA_NEURAL	0.133287	1.69603	0.049158
TAVOR_CEBPA_TARGETS_DN	0.261473	1.696	0.049142
KYNG_RESPONSE_TO_H2O2	0.171893	1.69565	0.0492032
REACTOME_AMINE_LIGAND_BINDING_RECEPTORS	0.236153	1.69425	0.0495499
REACTOME_P130CAS_LINKAGE_TO_MAPK_SIGNALING_FOR_INTEGRINS	0.363449	1.69278	0.0499066
BIOCARTA_MEF2D_PATHWAY	0.333635	1.69227	0.0500164
LU_TUMOR_ANGIOGENESIS_UP	0.281805	1.69134	0.0502105
GRADE_METASTASIS_DN	0.22011	1.69097	0.0502882
KEGG_GLIOMA	0.17662	1.69033	0.0504388
KEGG_DRUG_METABOLISM_CYTOCHROME_P450	0.174952	1.68829	0.050923
CHEN_HOXA5_TARGETS_9HR_DN	0.239487	1.68806	0.0509587
SA_G1_AND_S_PHASES	0.363555	1.68759	0.0510616
SESTO_RESPONSE_TO_UV_C7	0.174038	1.68722	0.0511055
BIOCARTA_TRKA_PATHWAY	0.402186	1.68444	0.0517465
OHM_METHYLATED_IN_ADULT_CANCERS	0.276311	1.68439	0.0517325
NIKOLSKY_BREAST_CANCER_1Q21_AMPLICON	0.233808	1.68435	0.0517129
REACTOME_GABA_B_RECEPTOR_ACTIVATION	0.23063	1.6835	0.0519189
LIEN_BREAST_CARCINOMA_METAPLASTIC_VS_DUCTAL_DN	0.143523	1.68139	0.0524984
REACTOME_HYALURONAN_METABOLISM	0.370796	1.68117	0.052534
BIOCARTA_EDG1_PATHWAY	0.272804	1.6807	0.0526187
PID_ALK1_PATHWAY	0.281389	1.68036	0.052672
WEI_MIR34A_TARGETS	0.119284	1.67949	0.0528767
KEGG_TGF_BETA_SIGNALING_PATHWAY	0.154935	1.67902	0.0529814
MAINA_VHL_TARGETS_DN	0.319535	1.67872	0.0530249
REACTOME_APC_C_CDH1_MEDIATED_DEGRADATION_OF_CDC20_AND_OTHER_APC_C_CDH1_TARGETED_PROTEINS_IN_LATE_MITOSIS_EARLY_G1	0.17927	1.67712	0.0534093
MEINHOLD_OVARIAN_CANCER_LOW_GRADE_DN	0.308969	1.67685	0.053442
REACTOME_TRANSCRIPTIONAL_REGULATION_OF_WHITE_ADIPOCYTE_DIFFERENTIATION	0.173034	1.67679	0.0534296
PENG_RAPAMYCIN_RESPONSE_UP	0.104825	1.67663	0.0534423
JIANG_HYPOXIA_VIA_VHL	0.242113	1.67623	0.0535208
MURAKAMI_UV_RESPONSE_6HR_DN	0.311838	1.67464	0.0539228
POOLA_INVASIVE_BREAST_CANCER_DN	0.126362	1.67281	0.054434
JECHLINGER_EPITHELIAL_TO_MESENCHYMAL_TRANSITION_DN	0.176042	1.67086	0.0549752
ZWANG_EGF_PERSISTENTLY_UP	0.251128	1.67049	0.0550549
TONKS_TARGETS_OF_RUNX1_RUNX1T1_FUSION_MONOCYTE_DN	0.196161	1.67043	0.0550424
DUTERTRE_ESTRADIOL_RESPONSE_6HR_UP	0.100526	1.66984	0.0551797
HAHTOLA_MYCOSIS_FUNGOIDES_SKIN_UP	0.110808	1.66964	0.0552
SCHMIDT_POR_TARGETS_IN_LIMB_BUD_UP	0.277243	1.66938	0.055234
SEIDEN_ONCOGENESIS_BY_MET	0.150613	1.66901	0.0553136
AMIT_EGF_RESPONSE_120_HELA	0.174293	1.66851	0.0554393
SHARMA_PILOCYTIC_ASTROCYTOMA_LOCATION_UP	0.286698	1.66746	0.0557226
REACTOME_ER_PHAGOSOME_PATHWAY	0.190106	1.66711	0.0557914
SUH_COEXPRESSED_WITH_ID1_AND_ID2_UP	0.322446	1.66631	0.0559557
ROME_INSULIN_TARGETS_IN_MUSCLE_DN	0.110562	1.66618	0.0559668
BIOCARTA_NFKB_PATHWAY	0.299776	1.66603	0.0559747
PENG_GLUCOSE_DEPRIVATION_DN	0.113228	1.66557	0.0560752
GUTIERREZ_CHRONIC_LYMPHOCYTIC_LEUKEMIA_DN	0.189471	1.66532	0.056135
LEE_NAIVE_T_LYMPHOCYTE	0.340961	1.66484	0.0562286
PID_MET_PATHWAY	0.157309	1.66439	0.0563253
REACTOME_POST_NMDA_RECEPTOR_ACTIVATION_EVENTS	0.241946	1.66363	0.0565028
PID_SMAD2_3NUCLEAR_PATHWAY	0.15635	1.6628	0.056689
REACTOME_ACTIVATED_POINT_MUTANTS_OF_FGFR2	0.345248	1.66274	0.0566776
REACTOME_CELL_CELL_JUNCTION_ORGANIZATION	0.193123	1.66176	0.0569212
DAWSON_METHYLATED_IN_LYMPHOMA_TCL1	0.190296	1.6613	0.0570214
DAZARD_UV_RESPONSE_CLUSTER_G24	0.27994	1.6585	0.0577852
PARK_APL_PATHOGENESIS_UP	0.369404	1.65762	0.0580085
RAY_TARGETS_OF_P210_BCR_ABL_FUSION_DN	0.339643	1.65747	0.0580178
YAO_TEMPORAL_RESPONSE_TO_PROGESTERONE_CLUSTER_0	0.167388	1.65725	0.0580517
REACTOME_EFFECTS_OF_PIP2_HYDROLYSIS	0.29322	1.65688	0.0581234
REACTOME_NITRIC_OXIDE_STIMULATES_GUANYLATE_CYCLASE	0.271498	1.65618	0.0583042
PELLICCIOTTA_HDAC_IN_ANTIGEN_PRESENTATION_UP	0.177018	1.65539	0.058492
WANG_ESOPHAGUS_CANCER_VS_NORMAL_DN	0.144056	1.65459	0.0586827
MAHADEVAN_RESPONSE_TO_MP470_UP	0.344719	1.65395	0.0588335
BIOCARTA_STEM_PATHWAY	0.370225	1.65365	0.0588977
REACTOME_ION_CHANNEL_TRANSPORT	0.187636	1.65275	0.0591342
REACTOME_SCFSKP2_MEDIATED_DEGRADATION_OF_P27_P21	0.192849	1.65193	0.0593336
GENTILE_UV_RESPONSE_CLUSTER_D1	0.319896	1.65163	0.0593828
GU_PDEF_TARGETS_DN	0.221785	1.6515	0.0593943
TAKAO_RESPONSE_TO_UVB_RADIATION_DN	0.149111	1.6514	0.0593964
IVANOVSKA_MIR106B_TARGETS	0.154504	1.65139	0.0593711
WAGNER_APO2_SENSITIVITY	0.286885	1.65131	0.0593535
MMS_MOUSE_LYMPH_HIGH_4HRS_UP	0.249047	1.65098	0.05942
ROSS_LEUKEMIA_WITH_MLL_FUSIONS	0.16532	1.65085	0.0594285
REACTOME_DARPP_32_EVENTS	0.283756	1.65052	0.0594992
BERTUCCI_INVASIVE_CARCINOMA_DUCTAL_VS_LOBULAR_DN	0.213987	1.64914	0.0598866
BOYAULT_LIVER_CANCER_SUBCLASS_G2	0.256751	1.64898	0.0599027
REACTOME_VIF_MEDIATED_DEGRADATION_OF_APOBEC3G	0.201008	1.64647	0.0605953
KERLEY_RESPONSE_TO_CISPLATIN_UP	0.216635	1.64608	0.0606798
NAKAMURA_ADIPOGENESIS_LATE_UP	0.142804	1.646	0.0606751
MCDOWELL_ACUTE_LUNG_INJURY_UP	0.211037	1.64521	0.060886
GOLDRATH_IMMUNE_MEMORY	0.179944	1.64395	0.0612242
BOHN_PRIMARY_IMMUNODEFICIENCY_SYNDROM_UP	0.211093	1.64374	0.0612513
BIOCARTA_ACE2_PATHWAY	0.383579	1.64273	0.0615322
BIOCARTA_GLYCOLYSIS_PATHWAY	0.423997	1.64182	0.0617513
HOFFMANN_IMMATURE_TO_MATURE_B_LYMPHOCYTE_UP	0.217541	1.6393	0.0624866
BIOCARTA_CK1_PATHWAY	0.322901	1.63884	0.0625975
RHODES_CANCER_META_SIGNATURE	0.171978	1.63875	0.0625965
IIZUKA_LIVER_CANCER_PROGRESSION_G1_G2_UP	0.421908	1.63825	0.0627255
BREDEMEYER_RAG_SIGNALING_VIA_ATM_NOT_VIA_NFKB_UP	0.202945	1.63778	0.0628025
ZHAN_VARIABLE_EARLY_DIFFERENTIATION_GENES_UP	0.350929	1.63671	0.0630908
NABA_BASEMENT_MEMBRANES	0.214134	1.63465	0.0637001
BIOCARTA_MCM_PATHWAY	0.318268	1.63447	0.0637195
CASORELLI_APL_SECONDARY_VS_DE_NOVO_UP	0.219468	1.63408	0.0638066
[truncated: 2,376 more rows]
