# Supplementary material for: RNA Binding Proteins as Drivers and Therapeutic Target Candidates in Pancreatic Ductal Adenocarcinoma
Source: Int J Mol Sci. 2020 Jun 11;21(11):4190. doi: 10.3390/ijms21114190 (PMC7312628; doi:10.3390/ijms21114190)
Supplement: Supplementary file 1 [file ijms-21-04190-s001.zip › S3.xlsx]

## Sheet: Tabelle1
gene_ID	gene	avg_CPM_pancreas	avg_CPM_PAAD	avg_CPM_PAAD_basal	avg_CPM_PAAD_classical	log2FC_panc_PAAD	FDR_panc_PAAD	log2FC_panc_basal	FDR_panc_basal	log2FC_panc_classical	FDR_panc_classical	log2FC_basal_classical	FDR_basal_classical	HR_PAAD	logrank_p_PAAD	HR_basal	logrank_p_basal	HR_classical	logrank_p_classical
ENSG00000013364	MVP	169.353	330.832	329.697	360.49	0.965992	1.96763e-59	0.961035	6.29879e-34	1.08985	8.13417e-52	0.128817	0.583533	1.22532	0.330804	0.972614	0.93371	1.60716	0.112551
ENSG00000125207	PIWIL1	0.0488317	1.12295	0.55505	1.37275	4.46027	3.86852e-83	3.44187	5.37576e-40	4.7457	1.38217e-80	1.30313	0.00452264	1.12065	0.5869	0.56652	0.0969624	1.8337	0.048045
ENSG00000134398	ERN2	2.15558	71.1867	44.9555	97.2963	5.0434	3.861e-143	4.38015	3.16135e-90	5.49404	1.10966e-145	1.11386	0.00402405	1.07701	0.722168	0.571736	0.0975849	1.73248	0.0652088
ENSG00000137834	SMAD6	6.07156	11.7191	12.2383	12.5387	0.948806	1.12451e-46	1.01127	5.91137e-31	1.04643	3.42647e-39	0.0351533	1	1.53592	0.0403929	1.3048	0.423424	1.53067	0.158657
ENSG00000144045	DQX1	0.115236	4.10378	2.01139	6.29241	5.12212	1.77627e-180	4.09019	1.22038e-101	5.73621	3.47814e-205	1.64558	8.99378e-08	1.02061	0.922096	0.711066	0.310795	1.87493	0.0331803
ENSG00000214274	ANG	6.61678	17.6386	10.2001	21.8107	1.41448	2.68549e-74	0.624592	3.67328e-10	1.72087	4.82143e-90	1.09632	4.0851e-16	1.07302	0.73536	0.757129	0.409005	1.63759	0.0947752
ENSG00000117877	CD3EAP	2.02497	3.51217	4.09307	3.26353	0.792735	5.92544e-54	1.0137	9.54805e-52	0.687119	5.37539e-28	-0.32666	0.00148105	1.44221	0.0809199	1.57805	0.173465	0.854355	0.599419
ENSG00000172172	MRPL13	10.2117	19.566	20.84	18.8455	0.937662	2.88556e-123	1.029	1.0347e-83	0.883443	1.25983e-72	-0.145562	0.165042	1.51952	0.0465438	2.46725	0.0071015	1.12778	0.690131
ENSG00000175792	RUVBL1	14.7706	33.2083	37.0559	31.2238	1.16839	3.96312e-192	1.32673	5.33458e-148	1.07941	1.25157e-113	-0.247321	0.00250038	1.17189	0.446784	1.67557	0.122636	0.952603	0.870644
ENSG00000184735	DDX53	0.0054778	0.063509	0.0569906	0.00097804	3.08846	7.85022e-11	2.90307	3.50094e-09	-1.18616	0.0177427	-4.35241	5.00111e-08	0.674953	0.259577	2.11399	0.0866713	0.409367	0.122423
ENSG00000012048	BRCA1	3.34662	7.65683	8.16705	7.22765	1.19225	1.26417e-110	1.28494	2.77946e-74	1.10934	1.1804e-64	-0.175625	0.240065	1.31208	0.195168	1.79892	0.0814557	0.862052	0.619027
ENSG00000073792	IGF2BP2	10.8565	29.3325	34.8181	28.2013	1.43345	5.77751e-75	1.68071	6.98348e-64	1.37673	2.17217e-49	-0.303996	0.11792	1.72521	0.0088682	1.56386	0.182282	1.34163	0.323605
ENSG00000076067	RBMS2	10.5916	43.2907	51.7552	40.1326	2.0302	0	2.28764	0	1.92081	0	-0.366844	3.0295e-06	1.50086	0.0519033	0.740086	0.365476	0.934479	0.821256
ENSG00000082153	BZW1	35.6457	82.4382	96.5474	74.0599	1.20946	6.69884e-176	1.43731	5.16029e-155	1.05489	6.792e-96	-0.382423	1.76812e-06	1.76202	0.00693584	1.43767	0.274231	1.30915	0.370669
ENSG00000089127	OAS1	3.43706	60.3365	63.8425	66.7683	4.13207	0	4.21341	6.57954e-298	4.2781	0	0.0646657	1	1.43365	0.0830552	1.04305	0.899535	0.977037	0.937906
ENSG00000102699	PARP4	45.9442	94.4792	91.642	104.991	1.03997	1.27894e-89	0.995912	1.09858e-48	1.19218	2.3085e-83	0.196265	0.135286	1.43358	0.0860766	1.42075	0.296414	1.14435	0.651555
ENSG00000104889	RNASEH2A	5.71273	12.2324	13.1344	11.4981	1.09702	3.43454e-108	1.20024	1.6475e-74	1.00786	1.87887e-61	-0.1924	0.128617	1.44317	0.0779879	2.31545	0.0127246	1.18682	0.565254
ENSG00000106305	AIMP2	5.54143	11.4573	11.6505	11.2878	1.04694	3.30897e-138	1.07134	3.94059e-81	1.02554	7.19937e-88	-0.0458114	0.938971	1.30118	0.207139	2.5012	0.00622702	0.566176	0.0546266
ENSG00000110367	DDX6	44.2654	99.2631	101.405	96.3059	1.16516	5.15971e-243	1.19592	4.23339e-146	1.12153	3.97777e-151	-0.0743917	0.603911	1.30467	0.202529	0.932999	0.835155	0.806091	0.468927
ENSG00000111331	OAS3	9.62382	64.0929	71.4928	65.7404	2.73497	8.52367e-228	2.89253	4.54721e-177	2.77158	6.87882e-183	-0.120959	0.825099	1.69952	0.0112724	1.4797	0.237516	1.28677	0.399402
ENSG00000111335	OAS2	3.22789	56.0294	59.8599	61.4988	4.11586	0	4.21112	9.53317e-288	4.25013	3.82861350275299e-319	0.0389872	1	1.33265	0.16789	1.32684	0.394645	1.04914	0.872454
ENSG00000111640	GAPDH	224.896	1600	1850.6	1377.83	2.83071	0	3.04063	0	2.61503	0	-0.425594	0.000275901	1.63096	0.0196318	1.29456	0.440205	1.21942	0.507751
ENSG00000111701	APOBEC1	0.0134438	4.13398	1.31668	6.26106	8.02521	2.85872e-183	6.35457	1.04192e-122	8.60759	8.1354e-208	2.24796	1.06973e-07	1.35005	0.153292	0.907822	0.77198	1.76091	0.0574514
ENSG00000117450	PRDX1	60.1458	154.12	156.023	162.236	1.35735	6.658e-207	1.37505	6.04159e-127	1.43139	3.12663e-162	0.0563465	0.886631	1.33222	0.169995	1.72612	0.102083	0.931091	0.811846
ENSG00000119314	PTBP3	48.0713	114.761	122.562	114.548	1.2552	1.59666e-198	1.35003	8.34114e-136	1.25255	8.92462e-137	-0.0974804	0.522278	1.94928	0.0017609	1.24744	0.508924	1.82929	0.0489673
ENSG00000119917	IFIT3	7.10165	32.1304	35.5683	33.4656	2.17708	2.37846e-154	2.32363	1.39949e-116	2.23579	3.38403e-123	-0.0878529	0.936075	1.4314	0.0849388	1.07056	0.837893	1.00702	0.981275
ENSG00000119922	IFIT2	3.42177	14.941	17.0315	14.639	2.12477	2.03261e-181	2.31342	1.06522e-140	2.09527	2.78267e-131	-0.21818	0.314713	1.34778	0.151684	1.68888	0.114014	0.727282	0.284522
ENSG00000124201	ZNFX1	27.5001	74.7803	79.2631	74.1012	1.44291	0	1.52678	1.78738e-226	1.4298	2.35834e-231	-0.0969737	0.421483	1.41319	0.0983983	1.62585	0.146533	1.08255	0.791426
ENSG00000124831	LRRFIP1	53.6979	139.067	150.11	135.468	1.3728	3.24385e-206	1.48298	2.50648e-143	1.33499	4.72044e-135	-0.147997	0.239472	1.82794	0.00414888	1.34321	0.377292	1.44699	0.218259
ENSG00000135114	OASL	0.510009	22.8246	23.6277	27.1058	5.47405	0	5.52305	4.62247493556169e-309	5.72134	0	0.198119	0.761785	1.77462	0.00602909	1.20282	0.579627	1.54988	0.140939
ENSG00000136231	IGF2BP3	0.935311	5.42368	6.62383	5.31683	2.53138	4.32108e-43	2.81922	3.85974e-36	2.5026	4.02618e-32	-0.316731	0.722124	1.58856	0.0268677	1.29327	0.43984	1.00706	0.981287
ENSG00000137628	DDX60	7.90602	41.4377	43.4114	44.9478	2.38923	8.07245e-236	2.45625	1.48668e-169	2.5065	1.7107e-201	0.0502348	1	2.07412	0.000554416	1.71476	0.106401	1.56917	0.139474
ENSG00000153250	RBMS1	21.2527	58.8082	72.5411	53.3491	1.46806	1.09068e-186	1.7707	3.05689e-182	1.32748	1.95936e-116	-0.443225	1.48259e-06	1.28593	0.226573	0.739303	0.369789	0.880977	0.670673
ENSG00000159217	IGF2BP1	0.0442725	1.29388	2.03892	1.00604	4.83292	2.46073e-108	5.48202	7.87165e-114	4.46678	5.24411e-84	-1.01764	0.0143995	1.31138	0.192637	1.53318	0.197115	0.801096	0.457045
ENSG00000165799	RNASE7	0.305391	0.849044	1.07707	0.658147	1.46475	2.49621e-28	1.80547	2.1903e-26	1.09654	1.81853e-11	-0.709638	0.0133594	1.38146	0.120387	1.22236	0.546894	1.11677	0.710984
ENSG00000167088	SNRPD1	12.8711	34.8974	32.2242	36.3509	1.43821	7.60516e-208	1.32348	3.57733e-103	1.49717	6.3087e-157	0.173683	0.158813	1.42833	0.0868392	1.54422	0.191654	1.49785	0.1734
ENSG00000174371	EXO1	0.187314	2.8732	3.09419	2.78476	3.91666	5.7846e-213	4.02177	1.54886e-165	3.87071	8.64358e-169	-0.151539	0.881341	1.46351	0.0684841	2.03445	0.0338932	0.859166	0.610406
ENSG00000180992	MRPL14	11.1416	29.6764	28.3198	31.204	1.4127	3.83343e-193	1.34564	1.95521e-102	1.48514	6.37893e-148	0.139501	0.343516	1.33786	0.162152	1.1618	0.652471	1.27744	0.416038
ENSG00000181381	DDX60L	13.6325	29.1143	32.3415	29.8664	1.09438	2.15694e-89	1.24585	4.66096e-71	1.13122	1.11365e-68	-0.114644	0.584105	2.03478	0.000730013	2.80449	0.00230602	1.3641	0.301657
ENSG00000182117	NOP10	18.5965	44.814	45.9801	47.1351	1.2686	1.45452e-189	1.30577	1.46993e-120	1.34139	3.48037e-150	0.0356157	1	1.64917	0.0159542	1.50309	0.219017	1.4863	0.186297
ENSG00000182545	RNASE10	0.011886	0.0359483	0.0417652	0.0324153	1.42996	3.93783e-17	1.61285	1.19001e-13	1.2908	5.79332e-10	-0.331115	0.562339	1.57675	0.0282053	1.83359	0.0686102	1.4492	0.211745
ENSG00000188739	RBM34	0.29728	1.32427	1.27775	1.38862	2.13536	3.73563034820567e-320	2.08859	4.00429e-184	2.20488	1.2578e-242	0.11611	0.562339	1.27796	0.239318	0.785177	0.467725	0.991425	0.977008
ENSG00000196141	SPATS2L	52.2835	158.529	180.61	157.187	1.60018	2.73385e-270	1.78828	6.83903e-224	1.58791	3.72237e-203	-0.200367	0.0512159	1.64864	0.0163041	0.949706	0.876958	1.43222	0.228645
ENSG00000242372	EIF6	45.7634	103.605	107.949	104.74	1.17858	2.18672e-173	1.2379	8.31013e-111	1.19432	2.14384e-121	-0.0435887	0.955387	1.59397	0.0252874	1.12792	0.718256	1.00082	0.997808
