# Supplementary material for: RNA Binding Proteins as Drivers and Therapeutic Target Candidates in Pancreatic Ductal Adenocarcinoma
Source: Int J Mol Sci. 2020 Jun 11;21(11):4190. doi: 10.3390/ijms21114190 (PMC7312628; doi:10.3390/ijms21114190)
Supplement: Supplementary file 1 [file ijms-21-04190-s001.zip › S4.xlsx]

## Sheet: Tabelle1
gene_ID	gene	avg_CPM_pancreas	avg_CPM_PAAD	avg_CPM_PAAD_basal	avg_CPM_PAAD_classical	log2FC_panc_PAAD	FDR_panc_PAAD	log2FC_panc_basal	FDR_panc_basal	log2FC_panc_classical	FDR_panc_classical	log2FC_basal_classical	FDR_basal_classical	HR_PAAD	logrank_p_PAAD	HR_basal	logrank_p_basal	HR_classical	logrank_p_classical
ENSG00000004534	RBM6	182.231	58.8914	55.2138	60.5955	-1.62961	6.50519e-259	-1.72264	3.82181e-127	-1.58846	9.20692e-138	0.134176	0.323838	0.581559	0.00986202	0.599827	0.130705	0.571885	0.065591
ENSG00000007392	LUC7L	76.2078	32.9104	30.7392	34.2155	-1.21138	2.38656e-128	-1.30978	7.31705e-68	-1.15533	3.47203e-67	0.154457	0.271184	0.491097	0.000720513	0.439603	0.0168199	0.723043	0.280514
ENSG00000013523	ANGEL1	88.1788	24.865	21.1124	21.2351	-1.82617	1.48231e-245	-2.06202	2.5849e-176	-2.05377	1.14823e-219	0.00824501	1	0.562858	0.00613679	1.0144	0.965828	0.539704	0.0394877
ENSG00000015479	MATR3	143.896	4.00803	4.04999	4.04043	-5.16379	0	-5.1496	0	-5.15227	0	-0.00264889	1	0	0	NA	NA	NA	NA
ENSG00000038358	EDC4	68.1639	28.4985	28.6976	28.3044	-1.25773	0	-1.248	7.60568e-156	-1.26745	2.64675e-199	-0.0194496	1	0.596649	0.0136578	0.395328	0.00652602	0.568225	0.0577198
ENSG00000059145	UNKL	20.3936	8.27877	8.46537	7.94412	-1.30001	8.5395e-165	-1.26808	6.89135e-72	-1.35937	3.90222e-101	-0.0912882	0.643959	0.752591	0.172311	0.892108	0.733428	0.796801	0.446164
ENSG00000062582	MRPS24	47.3445	5.68213	5.64293	5.169	-3.05874	2.51608e-258	-3.06824	2.7495e-109	-3.19501	3.81475e-147	-0.126763	0.779613	0.72489	0.123445	1.16897	0.63969	0.748343	0.33027
ENSG00000067048	DDX3Y	38.287	17.8082	16.3879	17.2578	-1.10421	0.000119994	-1.22409	0.00671048	-1.14951	0.00381353	0.0745895	1	0.904236	0.630413	0.913236	0.785657	0.633711	0.1305
ENSG00000082258	CCNT2	69.5105	29.2437	29.1607	29.9961	-1.24868	5.07071031398903e-313	-1.25297	8.32995e-144	-1.21202	3.06544e-168	0.0409496	0.885785	0.909691	0.650454	0.720654	0.326554	0.62803	0.122948
ENSG00000090905	TNRC6A	97.3206	39.4022	39.3107	38.2631	-1.30397	0	-1.30748	9.72844e-177	-1.34626	7.34035e-232	-0.038777	0.875957	0.576018	0.00809871	0.626953	0.163427	0.65695	0.158299
ENSG00000099622	CIRBP	592.571	212.769	177.15	189.897	-1.47772	1.00523e-145	-1.74201	6.40629e-106	-1.64182	2.63239e-119	0.100194	0.641831	0.487002	0.000618965	0.675562	0.239254	0.493223	0.0204973
ENSG00000100101	RP1-37E16.12	16.0361	0.0249516	0.0196296	0.0242981	-9.31631	0	-9.49905	0	-9.25994	0	0.249291	0.593828	0.89882	0.609113	0.420421	0.00893486	0.933976	0.8188
ENSG00000100142	POLR2F	15.284	0.204743	0.234753	0.185957	-6.21373	0	-6.00454	0	-6.35743	0	-0.353536	0.00442832	0.977545	0.913451	1.15516	0.665442	0.693854	0.227112
ENSG00000100201	DDX17	761.904	345.713	335.422	355.798	-1.14001	2.0211e-306	-1.18362	8.26301e-150	-1.09852	3.12056e-162	0.085096	0.353391	0.880599	0.544117	0.606062	0.138845	0.939705	0.834783
ENSG00000100650	SRSF5	268.801	135.476	130.448	135.948	-0.988447	1.07511e-157	-1.04302	5.56628e-81	-0.983442	5.8527e-90	0.0595809	0.765604	0.639905	0.0342489	0.476204	0.0287055	0.938134	0.832396
ENSG00000100836	PABPN1	138.53	62.5683	60.0365	64.3346	-1.14675	1.37919e-212	-1.20627	7.32196e-107	-1.10662	2.588e-113	0.0996558	0.378387	0.67618	0.061144	0.529246	0.0621989	0.972054	0.924277
ENSG00000100890	KIAA0391	12.4397	3.2701	3.32643	3.14478	-1.92426	0	-1.90197	2.54786e-297	-1.97901	0	-0.0770377	0.503615	0.949801	0.805293	0.925389	0.817128	0.70632	0.246948
ENSG00000100941	PNN	149.026	68.9618	66.7146	72.2822	-1.11158	3.03763e-235	-1.15938	6.3922e-118	-1.04376	1.18434e-120	0.115622	0.192208	0.827138	0.363833	0.600041	0.130979	0.712457	0.259021
ENSG00000101104	PABPC1L	95.5165	17.8595	17.4554	19.2714	-2.41909	7.55854e-205	-2.45202	6.06637e-90	-2.30935	2.07713e-102	0.142687	0.656691	0.756569	0.181186	0.921231	0.80582	0.581516	0.0662737
ENSG00000101489	CELF4	3.61037	3.14871	1.53411	1.44665	-0.196835	0.192451	-1.23156	2.04787e-12	-1.31629	5.11143e-17	-0.0847232	1	0.657054	0.0432439	1.18278	0.614676	0.507716	0.0231788
ENSG00000104177	MYEF2	28.851	9.5073	7.04728	8.37177	-1.60091	4.74588e-89	-2.03276	2.04366e-71	-1.78426	1.5973e-71	0.248533	0.186513	0.55788	0.00502019	0.736011	0.358923	0.553738	0.0469242
ENSG00000104529	EEF1D	457.762	104.714	111.845	99.8585	-2.1283	0	-2.03307	2.47739e-199	-2.19686	2.31479e-285	-0.163792	0.114628	0.976929	0.910891	1.53348	0.202545	0.648288	0.145373
ENSG00000104835	SARS2	19.3934	3.7939	3.57208	3.81215	-2.35565	0	-2.44108	1.78738e-226	-2.34859	6.0136e-267	0.0925272	0.637504	0.855028	0.45254	1.69318	0.112231	0.625199	0.114095
ENSG00000104852	SNRNP70	462.497	143.124	140.678	142.553	-1.69219	2.49146e-263	-1.71705	3.50728e-119	-1.69796	4.90703e-146	0.0190892	1	0.446261	0.000113381	0.462361	0.0226856	0.55477	0.0463119
ENSG00000104859	CLASRP	69.467	31.0817	30.6959	31.5727	-1.16036	1.41914e-144	-1.1783	6.13235e-68	-1.13771	5.18286e-79	0.0405909	0.994637	0.520973	0.00180029	0.529123	0.0621001	0.717795	0.264961
ENSG00000105373	GLTSCR2	709.783	265.98	239.057	267.589	-1.41612	1.81858e-135	-1.57002	8.14747e-75	-1.40741	8.20591e-77	0.162614	0.319636	0.642529	0.0351915	NA	NA	NA	NA
ENSG00000106246	PTCD1	11.3654	5.08434	4.84672	5.11946	-1.16153	5.59012e-193	-1.22898	2.13105e-99	-1.15084	2.80071e-109	0.0781608	0.623897	0.691972	0.0768714	0.701486	0.291751	0.809866	0.479523
ENSG00000107864	CPEB3	16.0083	5.65345	4.5095	5.64369	-1.50028	1.60441e-194	-1.82609	1.0202e-144	-1.50281	2.083e-128	0.32333	0.000397512	0.774583	0.220304	0.909931	0.777308	0.777493	0.398385
ENSG00000108848	LUC7L3	231.601	83.3362	78.6675	85.1784	-1.47456	3.59794e-279	-1.55772	4.67235e-138	-1.44304	2.87873e-150	0.114686	0.346541	0.666269	0.0526265	0.937974	0.847871	0.647268	0.146321
ENSG00000110844	PRPF40B	15.6971	6.7563	6.71628	6.33698	-1.21608	3.10596e-149	-1.22459	4.64034e-71	-1.30874	2.58524e-99	-0.0841523	0.684657	0.717951	0.111756	1.09964	0.775933	0.558899	0.0524982
ENSG00000112739	PRPF4B	90.5859	46.555	44.28	47.9395	-0.959945	5.2933e-225	-1.03234	3.60749e-120	-0.917718	1.11996e-119	0.114627	0.12265	0.892888	0.587493	0.65487	0.212226	0.941722	0.840403
ENSG00000113240	CLK4	43.7684	15.0642	14.379	15.2133	-1.53832	1.96127e-307	-1.60556	3.26222e-148	-1.52418	1.18625e-168	0.0813846	0.620089	0.66779	0.0539865	0.81034	0.529902	0.826068	0.521883
ENSG00000120662	MTRF1	16.3232	6.33019	5.64262	7.05848	-1.36582	4.54852e-196	-1.53151	6.75792e-114	-1.20882	9.23678e-93	0.322729	0.000222652	0.698006	0.0848408	0.769417	0.433194	0.781406	0.406981
ENSG00000122026	RPL21	567.355	193.808	179.729	181.87	-1.54971	2.49003e-165	-1.6584	2.82817e-87	-1.64146	5.76778e-107	0.016932	1	0.695396	0.0816101	0.908878	0.77465	0.608097	0.0938915
ENSG00000124193	SRSF6	251.127	96.9876	92.328	95.3659	-1.37254	0	-1.44355	1.41362e-189	-1.39689	1.0395e-222	0.0466576	0.82363	0.593401	0.0126741	0.53524	0.063149	0.684404	0.206245
ENSG00000125844	RRBP1	1005.31	390.625	351.833	405.271	-1.36379	1.01097e-143	-1.51466	1.79124e-79	-1.31067	1.75167e-76	0.203991	0.111973	0.895013	0.594579	0.700268	0.289368	0.702967	0.235772
ENSG00000126952	NXF5	0.0646578	0.0217179	0.0138656	0.013719	-1.46794	2.67824e-20	-2.01945	1.07198e-17	-2.03038	3.80572e-22	-0.00703224	1	0.651188	0.0412091	1.36156	0.352591	0.586001	0.0755178
ENSG00000129824	RPS4Y1	156.744	60.3244	49.9637	64.9072	-1.37758	1.80907e-06	-1.64941	0.000297655	-1.27195	0.00141861	0.37746	0.855768	0.824521	0.356888	0.852899	0.633286	0.626115	0.120465
ENSG00000130810	PPAN	22.3619	4.70371	4.2122	4.72483	-2.2513	1.08719639433012e-318	-2.40813	3.31608e-157	-2.24416	1.60313e-175	0.164014	0.311077	0.690595	0.0776	1.15488	0.665969	0.886124	0.686772
ENSG00000131368	MRPS25	48.2984	24.3117	22.3207	25.2618	-0.990763	1.32232e-159	-1.11341	7.6517e-94	-0.935194	2.56829e-84	0.178224	0.027201	0.707552	0.0993609	0.639909	0.183008	0.76315	0.372926
ENSG00000131503	ANKHD1	146.489	4.22071	3.98179	4.48999	-5.11643	0	-5.2	0	-5.0283	0	0.17174	0.0210835	1.10643	0.627585	0.667179	0.233329	1.02888	0.924087
ENSG00000132972	RNF17	0.105071	0.0581014	0.0256651	0.0851067	-0.834902	0.00854982	-1.93196	8.3271e-05	-0.301681	0.580754	1.65328	0.0141852	0.755968	0.178391	0.525451	0.0592025	0.999501	0.998667
ENSG00000134186	PRPF38B	85.1449	42.6322	41.5643	44.4649	-0.997616	4.80547e-231	-1.03444	1.2734e-115	-0.936878	3.07422e-119	0.0975685	0.250733	1.0734	0.734095	0.603732	0.135769	0.966886	0.910088
ENSG00000134744	ZCCHC11	36.123	18.0888	18.595	16.6254	-0.997174	5.39951e-117	-0.957588	3.2911e-52	-1.11872	1.05919e-85	-0.161137	0.126824	0.678394	0.062672	0.923141	0.810631	0.68889	0.209684
ENSG00000134874	DZIP1	41.5198	19.1414	19.9375	17.6291	-1.11699	3.25646e-59	-1.05817	3.6763e-25	-1.2358	7.49509e-41	-0.177627	0.410283	0.702239	0.0921369	0.759333	0.410266	0.651166	0.152061
ENSG00000135097	MSI1	8.58159	4.45364	2.30297	2.15808	-0.945596	6.25728e-16	-1.89637	4.90771e-43	-1.99067	2.82515e-58	-0.0942913	0.932407	0.528767	0.00241674	0.663358	0.226671	0.522877	0.0301269
ENSG00000135473	PAN2	112.247	25.6494	22.1628	25.4638	-2.1295	0	-2.34026	4.26796e-199	-2.13998	2.38896e-215	0.200295	0.0782476	0.704193	0.0937188	0.837978	0.596002	1.03507	0.908513
ENSG00000140488	CELF6	8.60159	0.0262237	0.0223642	0.0262096	-8.22294	0	-8.45327	0	-8.22748	0	0.234825	0.711483	0.861695	0.477517	0.48924	0.0326877	1.11101	0.727132
ENSG00000143624	INTS3	85.6195	46.2616	42.0007	48.0304	-0.888006	7.58283e-95	-1.02746	3.3133e-59	-0.833884	7.04979e-50	0.193576	0.0476686	0.581157	0.0101139	0.569919	0.0919533	0.783469	0.421435
ENSG00000144161	ZC3H8	14.9047	6.95288	6.83446	6.92174	-1.10023	1.77166e-186	-1.12451	7.33714e-90	-1.10675	4.93459e-108	0.0177607	1	0.803091	0.293818	0.656558	0.206341	0.812577	0.486539
ENSG00000145425	RPS3A	601.495	276.15	261.251	263.191	-1.12315	2.53445e-131	-1.20308	2.1538e-71	-1.19253	3.91651e-87	0.0105518	1	0.781894	0.238619	1.11269	0.74897	0.745228	0.322351
ENSG00000146453	PNLDC1	0.991782	0.517863	0.399242	0.474921	-0.937189	1.63708e-12	-1.3101	3.83357e-11	-1.06678	1.25854e-09	0.243782	0.669913	0.921869	0.696413	0.939447	0.85133	0.64407	0.137742
ENSG00000148584	A1CF	29.1695	8.11924	3.36136	7.66262	-1.84453	7.66483e-53	-3.11545	5.83721e-70	-1.92798	2.24766e-40	1.18764	5.74039e-10	0.690491	0.074666	1.17247	0.632757	0.741624	0.315339
ENSG00000149016	TUT1	37.8884	10.9112	10.7552	10.8174	-1.79688	0	-1.81659	2.1092e-224	-1.8093	1.31735e-278	0.00729107	1	0.823156	0.350011	0.663372	0.217859	1.05327	0.862101
ENSG00000149577	SIDT2	232.167	48.1497	43.7134	47.4354	-2.26958	0	-2.40893	9.57525e-176	-2.29106	2.1874e-203	0.117877	0.533641	0.681694	0.0660705	0.697075	0.279372	0.800784	0.458044
ENSG00000150593	PDCD4	733.092	73.7374	65.456	72.9818	-3.31353	0	-3.48534	3.02754e-232	-3.32842	3.48667e-274	0.156924	0.424793	0.768657	0.207422	0.945084	0.865635	0.729031	0.290123
ENSG00000158806	NPM2	6.38737	3.56704	2.25792	2.87575	-0.84158	3.95685e-19	-1.49999	2.18439e-32	-1.15246	2.85132e-25	0.347633	0.0758404	0.634698	0.028815	0.774997	0.443929	0.569658	0.0588732
ENSG00000159409	CELF3	10.064	12.9242	4.7694	5.00061	0.360752	0.0431594	-1.07675	2.5143e-06	-1.00853	7.02307e-07	0.0682372	1	0.592299	0.0117726	0.928158	0.822982	0.624515	0.11324
ENSG00000160201	U2AF1	46.8675	0.826603	0.841607	0.887926	-5.81974	0	-5.79604	3.05774e-244	-5.71528	1.67425e-306	0.0809189	0.996222	0.763604	0.198337	0.55785	0.083354	0.911914	0.758484
ENSG00000161082	CELF5	2.23059	1.21047	0.45542	0.532485	-0.880816	3.05222e-11	-2.28814	2.80448e-48	-2.0623	7.59367e-51	0.22628	0.529908	0.68673	0.0699033	0.626756	0.159837	0.900181	0.724768
ENSG00000161265	U2AF1L4	15.0678	6.58128	6.01326	6.568	-1.19536	5.95031e-105	-1.32522	3.42872e-59	-1.19823	2.83035e-61	0.127012	0.501783	0.481233	0.000497032	0.701009	0.296241	0.552891	0.04634
ENSG00000162231	NXF1	130.633	58.3322	57.6743	58.3269	-1.16313	1.37134e-285	-1.17953	3.42878e-133	-1.16329	3.33369e-161	0.0162354	1	0.740733	0.153325	0.514298	0.0475904	0.722801	0.280015
ENSG00000162664	ZNF326	51.1858	18.8308	17.6196	19.0707	-1.44214	0	-1.5384	3.39667e-231	-1.42367	3.70771e-251	0.114731	0.144926	0.839741	0.403415	0.631828	0.175482	1.10792	0.730981
ENSG00000163239	TDRD10	1.3495	0.67689	0.635788	0.652344	-0.991393	1.36129e-34	-1.08309	1.84148e-19	-1.04681	1.77386e-22	0.0363861	1	0.687164	0.0759133	0.434803	0.0135024	0.631351	0.131312
ENSG00000163682	RPL9	742.47	339.179	314.842	337.411	-1.13033	5.01331e-105	-1.23769	6.10952e-58	-1.13789	1.00932e-61	0.0997992	0.645774	0.68618	0.0716465	0.989779	0.975414	0.680054	0.195923
ENSG00000165275	TRMT10B	12.1374	6.49564	5.86215	6.58781	-0.901341	7.15969e-155	-1.0493	8.62799e-103	-0.88093	5.07188e-92	0.16839	0.0205285	0.558474	0.00510276	0.582077	0.109101	0.618717	0.106144
ENSG00000165819	METTL3	43.2178	20.0643	19.6756	19.4634	-1.10657	2.01971e-255	-1.1349	6.07785e-126	-1.15028	3.82295e-160	-0.0153781	1	0.568986	0.00747735	0.829869	0.577661	0.361891	0.000795574
ENSG00000167658	EEF2	3983.21	1596.82	1501.71	1535.2	-1.31874	4.87283e-205	-1.40733	4.34199e-109	-1.37551	2.46333e-130	0.0318189	1	0.696311	0.0815666	0.915415	0.791155	0.937866	0.829988
ENSG00000167978	SRRM2	1422.07	416.12	407.275	439.686	-1.7729	0	-1.8039	7.96067e-192	-1.69343	6.53115e-215	0.110475	0.346411	0.926674	0.715914	0.605569	0.138191	1.19084	0.558379
ENSG00000169045	HNRNPH1	387.616	181.553	181.795	182.134	-1.09418	2.22031e-252	-1.09229	9.28601e-115	-1.08958	1.26656e-141	0.0027135	1	0.722442	0.123019	0.627477	0.168959	0.582271	0.0720104
ENSG00000169062	UPF3A	42.2423	18.5577	17.2994	18.3099	-1.18662	1.6372e-157	-1.28774	7.95147e-86	-1.20598	1.19136e-94	0.0817708	0.670168	0.576974	0.00829639	0.783353	0.465518	0.646949	0.145858
ENSG00000171861	RNMTL1	18.7748	8.40502	7.43136	8.21156	-1.16067	1.18456e-142	-1.3365	5.96528e-92	-1.19459	4.79114e-93	0.141926	0.229744	0.634161	0.0300351	NA	NA	NA	NA
ENSG00000173464	RNASE11	0.0064458	0	0	0	-1.89975	1.99537e-13	-1.79804	2.14235e-05	-1.824	7.67153e-07	0	1	0	0	NA	NA	NA	NA
ENSG00000176444	CLK2	66.0888	33.77	32.5895	36.9919	-0.968829	1.96871e-130	-1.02006	5.29837e-71	-0.83745	5.2306e-61	0.18261	0.035674	0.816872	0.33222	0.579902	0.106613	0.70611	0.240884
ENSG00000179455	MKRN3	0.327934	0.188857	0.263791	0.153009	-0.785562	0.000680179	-0.308637	0.460278	-1.08439	0.000545033	-0.777974	0.175249	0.857292	0.461503	0.972567	0.933902	0.625855	0.117122
ENSG00000179988	PSTK	4.28894	2.10887	1.76104	2.01823	-1.02669	1.09313e-104	-1.28114	1.87979e-87	-1.08925	2.91291e-80	0.191975	0.0561887	0.774987	0.222021	1.01971	0.953301	1.29522	0.385327
ENSG00000180113	TDRD6	3.06683	1.4732	1.37307	1.39829	-1.05442	1.21867e-34	-1.15633	1.73126e-19	-1.12914	5.08503e-23	0.027232	1	0.599125	0.0140941	0.587668	0.115655	0.713322	0.255975
ENSG00000182196	ARL6IP4	90.6828	1.80953	1.62982	1.87516	-5.65053	0	-5.79926	0	-5.60005	0	0.199336	0.150118	0.664792	0.0506026	0.685509	0.261189	0.904341	0.735882
ENSG00000184735	DDX53	0.0054778	0.063509	0.0569906	0.00097804	3.08846	7.85022e-11	2.90307	3.50094e-09	-1.18616	0.0177427	-4.35241	5.00111e-08	0.674953	0.259577	2.11399	0.0866713	0.409367	0.122423
ENSG00000185163	DDX51	37.9208	16.9506	15.5663	16.3437	-1.16198	5.56204e-170	-1.2846	2.77656e-100	-1.21474	1.63869e-112	0.0698679	0.718709	0.671303	0.0558022	0.712199	0.309272	0.780874	0.406609
ENSG00000185246	PRPF39	50.4597	18.8193	18.1685	19.2686	-1.42258	0	-1.4736	2.25605e-168	-1.38855	1.20516e-188	0.0850608	0.474702	0.580643	0.00964469	0.70329	0.295298	0.662433	0.166816
ENSG00000185736	ADARB2	3.58977	1.75707	1.06961	1.46034	-1.03052	3.58145e-14	-1.74545	3.64205e-18	-1.29907	1.1056e-13	0.446653	0.185073	0.76402	0.196358	0.82825	0.571881	0.665339	0.171435
ENSG00000187742	SECISBP2	89.7303	33.126	30.6453	32.4919	-1.43755	0	-1.54986	1.58793e-264	-1.46524	1.17523e-298	0.084626	0.325974	0.751529	0.170174	0.642076	0.182944	0.949433	0.861849
ENSG00000188613	NANOS1	8.40818	2.26348	1.72086	1.34293	-1.89178	4.34793e-78	-2.28546	3.9382e-68	-2.64388	1.48341e-108	-0.358514	0.0559468	0.670743	0.0547622	0.690502	0.264575	0.731957	0.29633
ENSG00000189007	ADAT2	19.7437	5.23383	5.10129	5.53284	-1.91556	5.11382e-256	-1.95186	1.79804e-116	-1.83564	4.64129e-131	0.116246	0.571311	0.771911	0.217052	0.730721	0.351431	0.61407	0.0993128
ENSG00000197114	ZGPAT	22.5277	7.09705	7.29789	7.13189	-1.66668	1.5918795109005e-320	-1.62655	3.02208e-136	-1.65926	3.51041e-176	-0.032704	1	0.670929	0.0549331	0.615156	0.151227	1.01617	0.957116
ENSG00000197181	PIWIL2	8.06959	2.64377	1.52836	3.48251	-1.61048	9.308e-48	-2.40019	2.52789e-45	-1.21192	7.18521e-18	1.18864	1.02e-09	1.26157	0.26689	0.54492	0.0660626	1.09843	0.754241
ENSG00000197976	AKAP17A	130.427	37.0348	34.5668	38.8066	-1.8162	0	-1.91565	1.19324e-176	-1.74882	7.70466e-189	0.166828	0.113705	0.497529	0.00113671	0.400904	0.0109969	0.763609	0.370094
ENSG00000203867	RBM20	83.1731	0.745643	0.598552	0.794567	-6.7993	0	-7.11229	1.0066e-141	-6.7092	4.18209e-168	0.403591	0.276506	0.694402	0.0804036	1.2329	0.529821	0.581285	0.0688163
ENSG00000204316	MRPL38	40.9643	5.12541	4.84639	4.96649	-2.99908	0	-3.0794	5.57912e-250	-3.04414	1.91927151434785e-310	0.0352893	1	0.587284	0.0109767	1.02344	0.944679	0.448976	0.00748216
ENSG00000205022	PABPN1L	0.204903	0.0208349	0.0176754	0.0199238	-3.16537	6.43687e-114	-3.35267	1.24138e-52	-3.26105	7.54794e-63	0.0980335	1	0.640096	0.0329852	0.705523	0.295908	0.518572	0.0296809
ENSG00000205323	SARNP	20.0504	1.66659	1.66892	1.68639	-3.59252	0	-3.58431	0	-3.58046	0	0.0039022	1	0.855128	0.455135	0.659757	0.215314	1.0442	0.885366
ENSG00000206150	RNASE13	0.17421	0.107254	0.0730032	0.144812	-0.690755	1.20294e-06	-1.23334	7.01535e-09	-0.272272	0.186032	0.96731	0.000629074	0.885593	0.560237	0.574596	0.100691	0.761155	0.358612
ENSG00000213339	QTRT1	101.091	26.3313	22.7015	25.7699	-1.94119	7.68828e-278	-2.15485	4.43794e-156	-1.97232	2.05487e-168	0.182539	0.157684	0.632721	0.0286261	0.83795	0.597643	0.713707	0.258639
ENSG00000214753	HNRNPUL2	121.097	56.2782	58.4439	56.2025	-1.10557	0	-1.05096	4.10699e-150	-1.1075	6.89622e-205	-0.0565421	0.596378	1.10511	0.631662	1.22341	0.54517	0.601834	0.08586
ENSG00000218823	PAPOLB	0.0313133	0.00791498	0.00782349	0.00630563	-1.65243	2.16599e-16	-1.65636	5.5055e-08	-1.85844	8.54686e-12	-0.207542	0.988165	0.54227	0.0109864	0.554458	0.120052	0.681426	0.281798
ENSG00000228049	POLR2J2	0.271554	0.00463356	0.00474617	0.0041918	-5.32195	3.01323e-201	-5.21418	7.47017e-80	-5.37506	3.51988e-104	-0.164182	1	0.580272	0.0360312	0.663756	0.303248	0.565018	0.120478
ENSG00000229117	RPL41	420.665	157.026	155.888	152.927	-1.42173	1.51253e-222	-1.43213	1.36269e-101	-1.45993	6.87512e-131	-0.0277987	1	0.74171	0.151215	0.898939	0.749515	1.05568	0.855806
ENSG00000241058	NSUN6	13.6628	6.73906	5.71723	7.17311	-1.01882	1.07974e-146	-1.25561	3.29379e-108	-0.928665	2.85807e-77	0.326981	6.56662e-06	0.624937	0.0250466	0.827165	0.571001	0.765715	0.378925
ENSG00000241945	PWP2	21.4417	0.934239	0.898009	1.06595	-4.51553	6.97598e-241	-4.57144	2.23342e-99	-4.32597	1.0534e-116	0.245706	0.581848	0.754353	0.175892	0.780066	0.457831	0.708948	0.24734
ENSG00000258818	RNASE4	35.2728	2.93886	1.89605	3.11179	-3.58521	0	-4.21441	3.48549e-278	-3.50284	1.76366e-267	0.711788	3.30691e-09	0.7144	0.107199	0.399237	0.00716111	1.59159	0.116569
ENSG00000262814	MRPL12	30.2364	12.7817	11.9599	11.9597	-1.24309	7.98285e-76	-1.33804	9.29405e-41	-1.33864	1.54988e-50	-0.000595982	1	0.85163	0.441108	1.40992	0.301099	0.608137	0.095931
ENSG00000266967	AARSD1	23.7252	3.53487	3.50339	3.51035	-2.74803	0	-2.75981	0	-2.75851	0	0.00132219	1	0.523662	0.00206063	0.602901	0.134682	0.785904	0.418961
ENSG00000269058	CALR3	0.052209	0.01346	0.00881348	0.0129149	-1.79768	9.91789e-25	-2.27089	6.01769e-17	-1.79677	4.31897e-15	0.504608	0.451142	0.699162	0.0847365	1.50979	0.216099	0.662419	0.16427
