# Supplementary material for: RNA Binding Proteins as Drivers and Therapeutic Target Candidates in Pancreatic Ductal Adenocarcinoma
Source: Int J Mol Sci. 2020 Jun 11;21(11):4190. doi: 10.3390/ijms21114190 (PMC7312628; doi:10.3390/ijms21114190)
Supplement: Supplementary file 1 [file ijms-21-04190-s001.zip › S5.xlsx]

## Sheet: Tabelle1
gene_ID	gene_name	avg_TPM_basal	avg_TPM_classical	pVal_Mann.Whitney_basal_classical
ENSG00000001497	LAS1L	5.08318	4.94358	0.437318
ENSG00000003756	RBM5	6.1613	6.05092	0.604675
ENSG00000004534	RBM6	5.28752	5.34151	0.764653
ENSG00000005007	UPF1	5.11332	4.84719	0.192303
ENSG00000005075	POLR2J	6.13012	6.42345	0.101697
ENSG00000005100	DHX33	3.16377	3.73194	0.019211
ENSG00000005189	REXO5	2.56311	2.74779	0.291822
ENSG00000005302	MSL3	3.80793	3.73206	0.72343
ENSG00000005436	GCFC2	3.17569	3.71365	0.0115181
ENSG00000006047	YBX2	0.688274	0.402057	0.889686
ENSG00000006744	ELAC2	4.96536	5.21172	0.285249
ENSG00000007376	RPUSD1	4.46319	4.51128	0.764653
ENSG00000007392	LUC7L	4.70331	5.05845	0.160023
ENSG00000007520	TSR3	5.45534	5.55834	0.682951
ENSG00000008988	RPS20	10.5454	10.7853	0.345593
ENSG00000009307	CSDE1	7.63589	7.67242	0.682951
ENSG00000011243	AKAP8L	5.31021	4.92477	0.0622836
ENSG00000011260	UTP18	5.44606	5.53175	0.567058
ENSG00000011304	PTBP1	7.76432	7.9775	0.530544
ENSG00000011376	LARS2	3.53731	3.67362	0.530544
ENSG00000012048	BRCA1	4.48873	4.15603	0.428384
ENSG00000013364	MVP	6.30356	6.42017	0.567058
ENSG00000013441	CLK1	5.93185	6.11543	0.237953
ENSG00000013523	ANGEL1	3.34045	3.27885	0.891812
ENSG00000014164	ZC3H3	3.03234	3.07153	0.764653
ENSG00000015479	MATR3	6.90593	7.18318	0.102507
ENSG00000020577	SAMD4A	3.31026	2.2367	0.128889
ENSG00000021776	AQR	3.94033	3.90539	0.846033
ENSG00000023191	RNH1	6.52704	6.60725	1
ENSG00000023734	STRAP	6.76376	6.54832	0.33826
ENSG00000026297	RNASET2	4.52531	5.12307	0.19628
ENSG00000029363	BCLAF1	5.42546	5.61581	0.222247
ENSG00000029639	TFB1M	3.70166	3.88952	0.530544
ENSG00000031698	SARS	6.81115	7.30826	0.260896
ENSG00000033030	ZCCHC8	4.2268	4.57414	0.160023
ENSG00000037241	RPL26L1	6.2705	6.62252	0.0909715
ENSG00000037474	NSUN2	6.43513	6.51436	0.934958
ENSG00000037897	METTL1	5.06751	5.29888	0.530544
ENSG00000038358	EDC4	5.37389	5.51976	0.530544
ENSG00000039123	SKIV2L2	NA	NA	0.530544
ENSG00000040341	STAU2	3.955	4.47649	0.0264161
ENSG00000041802	LSG1	4.95764	5.19859	0.33826
ENSG00000043514	TRIT1	4.41069	4.24794	0.33826
ENSG00000046647	GEMIN8	3.12302	3.48448	0.216429
ENSG00000047188	YTHDC2	3.45045	3.29274	0.396949
ENSG00000047315	POLR2B	5.81984	5.85041	0.978303
ENSG00000047410	TPR	5.00913	5.12702	0.428384
ENSG00000048162	NOP16	5.84726	6.05184	0.366908
ENSG00000048544	MRPS10	5.21584	5.48369	0.530544
ENSG00000048740	CELF2	0.273547	0.113104	0.635066
ENSG00000048828	FAM120A	5.96625	6.10219	0.33826
ENSG00000048991	R3HDM1	4.0716	4.5914	0.0630834
ENSG00000049883	PTCD2	2.67146	2.92049	0.260896
ENSG00000051596	THOC3	6.01889	6.30273	0.19628
ENSG00000052749	RRP12	4.38637	4.66385	0.267165
ENSG00000053372	MRTO4	5.38402	5.03568	0.05451
ENSG00000054118	THRAP3	5.48348	5.67129	0.243981
ENSG00000055044	NOP58	6.43195	6.92831	0.019211
ENSG00000055332	EIF2AK2	4.41908	4.54207	0.643345
ENSG00000055917	PUM2	4.66894	5.20654	1.16252e-05
ENSG00000055950	MRPL43	6.06649	6.29583	0.102507
ENSG00000056097	ZFR	5.3064	5.61309	0.102507
ENSG00000056586	RC3H2	4.1137	3.97105	0.396949
ENSG00000058673	ZC3H11A	5.60629	5.78656	0.643345
ENSG00000058729	RIOK2	3.47796	3.60513	0.366908
ENSG00000059145	UNKL	3.34423	3.49366	0.643345
ENSG00000059378	PARP12	4.62321	3.95496	0.0137226
ENSG00000059588	TARBP1	4.57166	4.8091	0.311045
ENSG00000059691	GATB	3.45258	3.63527	0.366908
ENSG00000060138	YBX3	7.86592	6.96287	0.0137226
ENSG00000060339	CCAR1	5.47897	5.76524	0.05451
ENSG00000060688	SNRNP40	5.55074	5.38822	0.72343
ENSG00000061794	MRPS35	5.83652	6.62313	0.00660312
ENSG00000061936	SFSWAP	4.40283	4.62225	0.366908
ENSG00000062582	MRPS24	7.263	7.31763	0.806542
ENSG00000063046	EIF4B	7.33921	8.14281	0.00115395
ENSG00000063177	RPL18	10.779	10.7988	0.848957
ENSG00000063244	U2AF2	7.45296	7.39379	0.891812
ENSG00000064419	TNPO3	4.63135	4.80191	0.33826
ENSG00000064607	SUGP2	5.17294	5.18257	0.934958
ENSG00000064703	DDX20	2.97529	2.96258	0.846033
ENSG00000065150	IPO5	6.11242	6.12171	0.806542
ENSG00000065183	WDR3	4.20441	4.43675	0.530544
ENSG00000065427	KARS	6.98387	7.20774	0.285249
ENSG00000065457	ADAT1	4.88881	4.84172	0.934958
ENSG00000065526	SPEN	4.78134	4.65691	0.495228
ENSG00000065548	ZC3H15	5.95146	6.29476	0.0162759
ENSG00000065978	YBX1	9.5939	9.67555	0.978303
ENSG00000066044	ELAVL1	5.3612	5.26627	0.682951
ENSG00000066651	TRMT11	3.86997	4.31563	0.0475244
ENSG00000066654	THUMPD1	4.20432	4.44899	0.237953
ENSG00000067048	DDX3Y	0.978239	0.145419	0.780314
ENSG00000067248	DHX29	3.86966	3.83233	0.978303
ENSG00000067334	DNTTIP2	5.32637	5.20916	0.682951
ENSG00000067533	RRP15	4.3501	4.25888	0.891812
ENSG00000067596	DHX8	4.67485	4.51394	0.260896
ENSG00000067704	IARS2	5.95773	6.35068	0.0225786
ENSG00000068784	SRBD1	2.57942	3.01598	0.035008
ENSG00000070047	PHRF1	3.93374	4.01367	0.739173
ENSG00000070366	SMG6	3.19796	3.39967	0.437318
ENSG00000070756	PABPC1	9.69043	9.95605	0.806542
ENSG00000070785	EIF2B3	4.57558	4.47319	0.764653
ENSG00000070814	TCOF1	5.14485	4.95361	0.604675
ENSG00000071082	RPL31	11.6224	12.0099	0.070918
ENSG00000071626	DAZAP1	6.14554	6.25464	0.567058
ENSG00000071894	CPSF1	6.00218	5.91641	0.72343
ENSG00000072364	AFF4	4.16883	4.19008	0.530544
ENSG00000072756	TRNT1	4.19895	4.24943	0.977869
ENSG00000072858	SIDT1	0.669162	0.398592	0.0754967
ENSG00000073146	MOV10L1	0.139798	0.078329	0.628776
ENSG00000073792	IGF2BP2	4.93895	4.90204	0.530544
ENSG00000074071	MRPS34	6.50277	6.83607	0.260896
ENSG00000074266	EED	5.10464	4.92669	0.495228
ENSG00000074356	NCBP3	4.34659	4.40554	0.934958
ENSG00000075151	EIF4G3	4.45792	4.32444	0.848957
ENSG00000075292	ZNF638	5.76062	6.10165	0.0475244
ENSG00000075856	SART3	4.97601	5.28101	0.05451
ENSG00000075914	EXOSC7	5.74171	5.96975	0.978303
ENSG00000075975	MKRN2	3.97005	4.14259	0.396949
ENSG00000076043	REXO2	6.78927	6.64538	0.72343
ENSG00000076053	RBM7	4.63061	4.70644	0.567058
ENSG00000076067	RBMS2	4.47547	3.86721	0.143842
ENSG00000076108	BAZ2A	5.00589	5.45808	0.0622836
ENSG00000076650	GPATCH1	2.83194	2.82804	1
ENSG00000076770	MBNL3	1.78953	2.02299	0.682951
ENSG00000076924	XAB2	4.70898	4.55455	0.366908
ENSG00000077312	SNRPA	6.0813	6.32475	0.177495
ENSG00000077348	EXOSC5	4.75805	4.88883	0.848957
ENSG00000078328	RBFOX1	0.0245213	0.0292639	0.859714
ENSG00000078687	TNRC6C	0.844441	1.47344	0.0357163
ENSG00000079134	THOC1	4.71973	4.96916	0.311045
ENSG00000079313	REXO1	4.05597	4.0123	0.891812
ENSG00000079785	DDX1	6.19321	6.60165	0.0264161
ENSG00000080007	DDX43	0.849837	0.964886	0.656349
ENSG00000080572	PIH1D3	0.018713	0.00571383	0.379868
ENSG00000080608	PUM3	4.6637	4.84855	0.764653
ENSG00000080802	CNOT4	2.96961	3.00196	0.682951
ENSG00000082153	BZW1	7.58201	7.53556	1
ENSG00000082258	CCNT2	3.69711	3.92328	0.285249
ENSG00000082515	MRPL22	5.31388	5.5569	0.143842
ENSG00000082516	GEMIN5	3.38601	3.5429	0.495228
ENSG00000082898	XPO1	6.3131	6.56727	0.128889
ENSG00000083223	ZCCHC6	NA	NA	0.128889
ENSG00000083312	TNPO1	5.43115	5.57925	0.461149
ENSG00000083520	DIS3	4.23666	4.22357	0.764653
ENSG00000083544	TDRD3	2.73517	2.61826	0.978303
ENSG00000083635	NUFIP1	2.49834	2.52513	0.977869
ENSG00000083845	RPS5	10.4582	10.1135	0.102507
ENSG00000084072	PPIE	5.5496	5.61096	0.643345
ENSG00000084092	NOA1	3.41167	3.61223	0.428384
ENSG00000084623	EIF3I	7.63427	7.54456	0.760257
ENSG00000085231	AK6	5.61558	6.10398	0.0475244
ENSG00000085760	MTIF2	4.71315	5.26703	2.75334e-05
ENSG00000085872	CHERP	4.674	4.68989	0.846033
ENSG00000086102	NFX1	3.85932	4.06305	0.366908
ENSG00000086189	DIMT1	4.62936	4.73943	0.934958
ENSG00000086200	IPO11	3.73265	3.85649	0.598147
ENSG00000086232	EIF2AK1	5.66489	6.11345	0.0115181
ENSG00000086504	MRPL28	6.23156	6.54973	0.33826
ENSG00000086589	RBM22	5.03111	5.06019	0.643345
ENSG00000087087	SRRT	6.49715	6.57745	0.682951
ENSG00000087269	NOP14	4.62138	4.89622	0.311045
ENSG00000087365	SF3B2	7.10769	7.16825	0.846033
ENSG00000087995	METTL2A	4.36967	4.08652	0.530544
ENSG00000088038	CNOT3	5.17073	5.03352	0.567058
ENSG00000088205	DDX18	5.42681	5.77827	0.0225786
ENSG00000088247	KHSRP	7.44746	7.54103	0.891812
ENSG00000088305	DNMT3B	1.98537	1.75535	0.487907
ENSG00000088930	XRN2	5.43842	5.61706	0.461149
ENSG00000088986	DYNLL1	8.77058	8.86243	0.764653
ENSG00000089009	RPL6	10.0341	10.5148	0.05451
ENSG00000089048	ESF1	4.08163	3.89975	0.33826
ENSG00000089127	OAS1	5.20469	5.14174	0.396949
ENSG00000089157	RPLP0	11.1801	11.4681	0.461149
ENSG00000089195	TRMT6	4.21496	4.47878	0.604675
ENSG00000089280	FUS	8.14658	8.58318	0.0622836
ENSG00000089682	RBM41	3.39857	3.54367	0.604675
ENSG00000089737	DDX24	6.48578	6.47027	0.891812
ENSG00000089876	DHX32	4.28317	4.65437	0.071369
ENSG00000090060	PAPOLA	6.0289	6.28611	0.128889
ENSG00000090097	PCBP4	3.66285	4.20502	0.0622836
ENSG00000090263	MRPS33	6.11821	6.42221	0.0909715
ENSG00000090470	PDCD7	3.69065	3.78443	0.428384
ENSG00000090621	PABPC4	7.07481	6.80889	0.160023
ENSG00000090861	AARS	6.5014	7.27674	0.0357163
ENSG00000090905	TNRC6A	4.03616	4.18289	0.657154
ENSG00000091009	RBM27	3.3536	3.54763	0.0521584
ENSG00000091127	PUS7	3.85128	4.0073	0.461149
ENSG00000091542	ALKBH5	4.50511	4.74501	0.33826
ENSG00000091732	ZC3HC1	3.6612	3.80575	0.396949
ENSG00000092199	HNRNPC	8.99721	9.15927	0.428384
ENSG00000092208	GEMIN2	4.13548	4.22691	0.311045
ENSG00000092345	DAZL	0.0270219	0.00426443	0.131535
ENSG00000092847	AGO1	2.46004	2.47575	0.978303
ENSG00000093167	LRRFIP2	4.73209	4.61459	0.366908
ENSG00000095485	CWF19L1	4.0335	4.20633	0.19628
ENSG00000095627	TDRD1	0.135218	0.32675	0.973024
ENSG00000096080	MRPS18A	5.32805	5.62034	0.216429
ENSG00000096171	VARS	5.82958	5.77072	0.848957
ENSG00000096401	CDC5L	3.63104	3.7942	0.604675
ENSG00000096746	HNRNPH3	7.44415	7.6189	0.160023
ENSG00000099381	SETD1A	3.22938	3.609	0.05451
ENSG00000099622	CIRBP	7.89636	7.7856	0.530544
ENSG00000099783	HNRNPM	7.7812	8.12513	0.05451
ENSG00000099817	POLR2E	7.34699	7.34308	0.978303
ENSG00000099821	POLRMT	4.61889	4.63306	0.978303
ENSG00000099899	TRMT2A	4.98624	4.78792	0.33826
ENSG00000099995	SF3A1	5.36619	5.2652	0.567058
ENSG00000100028	SNRPD3	7.94143	7.6158	0.102507
ENSG00000100029	PES1	5.96142	5.75047	0.495228
ENSG00000100038	TOP3B	4.03092	3.62055	0.070918
ENSG00000100056	DGCR14	NA	NA	0.070918
ENSG00000100101	Z83844.1	NA	NA	0.070918
ENSG00000100109	TFIP11	4.16535	3.86171	0.115134
ENSG00000100129	EIF3L	7.58204	7.70957	0.891812
ENSG00000100138	SNU13	6.7957	7.0538	0.682951
ENSG00000100142	POLR2F	6.61783	6.31087	0.237953
ENSG00000100201	DDX17	6.90333	6.68288	0.643345
ENSG00000100220	RTCB	5.98306	5.8691	0.764653
ENSG00000100226	GTPBP1	4.3497	4.18349	0.33826
ENSG00000100227	POLDIP3	5.19634	5.04743	0.461149
ENSG00000100296	THOC5	4.21504	4.32947	0.366908
ENSG00000100298	APOBEC3H	0.471001	0.197205	0.0144696
ENSG00000100316	RPL3	10.3772	10.6934	0.177495
ENSG00000100319	ZMAT5	3.30459	3.65853	0.101697
ENSG00000100320	RBFOX2	5.13798	4.80961	0.285249
ENSG00000100353	EIF3D	7.61992	7.4922	0.33826
ENSG00000100354	TNRC6B	2.10583	2.18099	0.978303
ENSG00000100403	ZC3H7B	4.79294	4.54737	0.237953
ENSG00000100410	PHF5A	5.87942	5.6758	0.682951
ENSG00000100416	TRMU	4.89606	4.83231	0.934958
ENSG00000100441	KHNYN	4.71275	4.24595	0.143842
ENSG00000100461	RBM23	5.63015	5.37004	0.285249
ENSG00000100601	ALKBH1	3.09502	3.06379	0.891812
ENSG00000100603	SNW1	6.04847	6.09142	0.567058
ENSG00000100650	SRSF5	8.25044	8.03253	0.396949
ENSG00000100664	EIF5	7.55121	7.28451	0.311045
ENSG00000100697	DICER1	3.87009	3.67956	0.177495
ENSG00000100722	ZC3H14	5.1693	5.3378	0.495228
ENSG00000100813	ACIN1	6.60732	6.3049	0.311045
ENSG00000100823	APEX1	7.40066	7.34373	0.978303
ENSG00000100836	PABPN1	6.83942	6.64643	0.495228
ENSG00000100883	SRP54	5.62125	5.77133	0.311045
ENSG00000100890	KIAA0391	4.53114	4.26177	0.216429
ENSG00000100902	PSMA6	8.13161	8.2117	0.764653
ENSG00000100941	PNN	6.77732	6.76788	0.934958
ENSG00000101104	PABPC1L	5.58976	5.84882	0.366908
ENSG00000101138	CSTF1	5.10882	5.31881	0.19628
ENSG00000101146	RAE1	5.48725	5.68375	0.396949
ENSG00000101161	PRPF6	6.01423	6.19241	0.149162
ENSG00000101210	EEF1A2	4.73648	5.63934	0.260896
ENSG00000101343	CRNKL1	3.72298	3.98143	0.530544
ENSG00000101347	SAMHD1	3.87631	3.2835	0.0909715
ENSG00000101361	NOP56	8.23105	8.06965	0.72343
ENSG00000101391	CDK5RAP1	5.30194	5.13696	0.764653
ENSG00000101452	DHX35	3.67757	3.44546	0.33826
ENSG00000101489	CELF4	0.32414	0.478207	0.133089
ENSG00000101654	RNMT	3.83534	4.24615	0.128889
ENSG00000101665	SMAD7	2.49053	2.44977	0.891812
ENSG00000101782	RIOK3	5.7471	6.13914	0.177495
ENSG00000101811	CSTF2	4.5891	4.49851	0.604675
ENSG00000101888	NXT2	2.87001	2.84595	0.891812
ENSG00000101916	TLR8	0.00477567	0.00287106	0.681846
ENSG00000102053	ZC3H12B	0.350832	0.534686	0.45308
ENSG00000102081	FMR1	4.58966	4.54071	0.637222
ENSG00000102103	PQBP1	6.41091	6.60519	0.530544
ENSG00000102241	HTATSF1	5.44204	5.3815	0.848957
ENSG00000102309	PIN4	4.78133	4.71572	0.604675
ENSG00000102317	RBM3	7.53656	7.89597	0.285249
ENSG00000102699	PARP4	5.34581	5.19298	0.560198
ENSG00000102738	MRPS31	4.22813	4.07464	0.366908
ENSG00000102786	INTS6	4.07898	3.97561	0.461149
ENSG00000102898	NUTF2	7.00208	6.90959	0.33826
ENSG00000102921	N4BP1	4.01689	3.72633	0.0412823
ENSG00000103005	USB1	5.4417	5.26066	0.604675
ENSG00000103067	ESRP2	4.83855	3.73584	0.0225786
ENSG00000103194	USP10	5.48285	5.87111	0.216429
ENSG00000103248	MTHFSD	3.86549	3.80143	0.682951
ENSG00000103319	EEF2K	2.66748	3.15709	0.0412823
ENSG00000103342	GSPT1	6.21516	6.51137	0.237953
ENSG00000103356	EARS2	3.79623	4.18463	0.115134
ENSG00000103495	MAZ	6.63787	7.06515	0.0307823
ENSG00000103510	KAT8	4.72539	4.91921	0.461149
ENSG00000103707	MTFMT	3.40393	3.65658	0.183013
ENSG00000103994	ZNF106	3.82579	3.88617	0.978303
ENSG00000104129	DNAJC17	4.91665	5.03729	0.604675
ENSG00000104131	EIF3J	6.03562	6.24821	0.396949
ENSG00000104177	MYEF2	2.85629	3.10012	0.78147
ENSG00000104299	INTS9	3.28108	3.1974	0.889686
ENSG00000104356	POP1	3.19965	3.14333	0.604675
ENSG00000104408	EIF3E	8.07653	8.48459	0.0357163
ENSG00000104413	ESRP1	5.33036	3.62888	0.19628
ENSG00000104529	EEF1D	9.41138	9.15913	0.495228
ENSG00000104613	INTS10	4.93376	4.71284	0.428384
ENSG00000104626	ERI1	3.41953	3.27906	0.682951
ENSG00000104679	R3HCC1	4.40565	3.95017	0.128889
ENSG00000104824	HNRNPL	7.83525	8.158	0.128889
ENSG00000104835	SARS2	4.51798	4.89327	0.311045
ENSG00000104852	SNRNP70	7.42984	7.34586	0.567058
ENSG00000104859	CLASRP	5.16615	4.99429	0.495228
ENSG00000104872	PIH1D1	6.44521	6.5209	0.806542
ENSG00000104889	RNASEH2A	5.5272	5.25055	0.643345
ENSG00000104897	SF3A2	5.48284	5.23966	0.115134
ENSG00000104907	TRMT1	5.11681	5.05281	0.978303
ENSG00000104967	NOVA2	0.18276	0.125895	0.610675
ENSG00000105127	AKAP8	4.35352	4.04617	0.285249
ENSG00000105171	POP4	6.20412	6.30004	0.934958
ENSG00000105193	RPS16	11.0276	11.0126	0.891812
ENSG00000105202	FBL	7.96827	8.19048	0.428384
ENSG00000105258	POLR2I	6.04065	6.20844	0.604675
ENSG00000105278	ZFR2	0.065911	0.00840643	0.182572
ENSG00000105298	CACTIN	3.81254	3.44825	0.019211
ENSG00000105323	HNRNPUL1	6.70875	6.73447	0.848957
ENSG00000105364	MRPL4	5.88432	5.69114	0.495228
ENSG00000105372	RPS19	11.2302	10.9601	0.428384
ENSG00000105373	NOP53	7.21355	7.73355	0.0804562
ENSG00000105447	GRWD1	4.92735	4.67205	0.374707
ENSG00000105576	TNPO2	5.04601	4.88985	0.567058
ENSG00000105618	PRPF31	6.15465	5.96435	0.285249
ENSG00000105640	RPL18A	10.7882	10.8651	0.848957
ENSG00000105671	DDX49	5.19273	5.06299	0.643345
ENSG00000105705	SUGP1	4.94675	4.81637	0.567058
ENSG00000105771	SMG9	5.09695	4.70627	0.177495
ENSG00000105793	GTPBP10	4.00283	4.26086	0.359965
ENSG00000105865	DUS4L	3.18653	3.40266	0.115134
ENSG00000105939	ZC3HAV1	4.20801	4.01344	0.260896
ENSG00000106105	GARS	6.63065	7.27326	0.115134
ENSG00000106246	PTCD1	2.80526	2.7564	0.760212
ENSG00000106263	EIF3B	7.29561	7.27544	0.978303
ENSG00000106305	AIMP2	5.70508	6.03848	0.070918
ENSG00000106344	RBM28	4.9189	4.66951	0.177495
ENSG00000106355	LSM5	6.42243	6.56318	0.396949
ENSG00000106462	EZH2	4.94595	4.9585	0.889686
ENSG00000106591	MRPL32	6.21329	6.18471	0.806542
ENSG00000107105	ELAVL2	0.246491	0.391084	0.932938
ENSG00000107164	FUBP3	5.30754	5.34931	0.72343
ENSG00000107201	DDX58	3.13878	2.39092	0.0307823
ENSG00000107290	SETX	4.17777	4.17357	1
ENSG00000107371	EXOSC3	5.1665	5.16299	0.643345
ENSG00000107581	EIF3A	6.49308	6.97429	0.00660312
ENSG00000107614	TRDMT1	1.65248	1.48679	0.495228
ENSG00000107625	DDX50	4.5099	4.7862	0.115134
ENSG00000107833	NPM3	5.7803	6.09331	0.260896
ENSG00000107864	CPEB3	0.780898	0.752444	0.846033
ENSG00000107929	LARP4B	4.58049	4.95386	0.128889
ENSG00000107937	GTPBP4	5.4068	5.83876	0.0264161
ENSG00000107951	MTPAP	3.19432	3.52761	0.0162759
ENSG00000107960	STN1	4.19267	4.49683	0.311045
ENSG00000108064	TFAM	5.43552	5.63086	0.285249
ENSG00000108107	RPL28	10.7264	10.2248	0.102507
ENSG00000108256	NUFIP2	5.02955	4.88484	0.530544
ENSG00000108298	RPL19	10.8656	10.8552	0.978303
ENSG00000108312	UBTF	5.23964	5.36715	0.428384
ENSG00000108349	CASC3	5.04197	4.98094	0.682951
ENSG00000108406	DHX40	4.22708	4.39293	0.567058
ENSG00000108424	KPNB1	7.85825	7.92803	0.806542
ENSG00000108506	INTS2	2.8303	2.89843	0.505559
ENSG00000108561	C1QBP	6.80874	7.47187	0.019211
ENSG00000108591	DRG2	4.36176	4.46122	0.682951
ENSG00000108592	FTSJ3	5.58753	5.28927	0.567058
ENSG00000108651	UTP6	5.39193	5.33352	0.567058
ENSG00000108825	PTGES3L-AARSD1	NA	NA	0.567058
ENSG00000108826	MRPL27	6.62166	6.58853	0.934958
ENSG00000108848	LUC7L3	7.19088	7.24805	0.567058
ENSG00000108883	EFTUD2	6.17051	6.01846	0.530544
ENSG00000109111	SUPT6H	5.09363	5.24024	0.530544
ENSG00000109475	RPL34	10.4244	10.6779	0.396949
ENSG00000109534	GAR1	5.07754	5.09584	0.934958
ENSG00000109606	DHX15	6.70839	6.82368	0.604675
ENSG00000109618	SEPSECS	1.87075	2.75851	0.00116938
ENSG00000109819	PPARGC1A	0.166339	0.683212	0.164459
ENSG00000109832	DDX25	0.0949098	0.114815	0.866583
ENSG00000110060	PUS3	3.23098	3.5545	0.128889
ENSG00000110063	DCPS	4.41393	4.67049	0.311045
ENSG00000110104	CCDC86	5.20971	5.34165	0.72343
ENSG00000110107	PRPF19	6.47654	6.78338	0.0804562
ENSG00000110321	EIF4G2	8.67789	8.55341	0.495228
ENSG00000110619	CARS	5.60298	5.8485	0.396949
ENSG00000110700	RPS13	10.5243	10.5547	0.682951
ENSG00000110844	PRPF40B	3.14606	3.34694	0.311045
ENSG00000110888	CAPRIN2	5.22537	5.15736	0.428384
ENSG00000110958	PTGES3	8.01043	8.3951	0.102507
ENSG00000111196	MAGOHB	5.01097	4.95099	0.764653
ENSG00000111331	OAS3	4.60353	4.01098	0.19628
ENSG00000111335	OAS2	2.86748	1.98065	0.222247
ENSG00000111361	EIF2B1	4.89681	5.07731	0.260896
ENSG00000111364	DDX55	4.82557	4.76456	0.891812
ENSG00000111405	ENDOU	0.249	0.286588	0.889411
ENSG00000111596	CNOT2	4.98899	5.8409	0.00115395
ENSG00000111605	CPSF6	5.58785	5.76093	0.366908
ENSG00000111615	KRR1	5.55862	5.75231	0.177495
ENSG00000111639	MRPL51	7.18768	7.11638	0.643345
ENSG00000111640	GAPDH	11.7462	11.533	0.366908
ENSG00000111641	NOP2	5.97173	5.7032	0.396949
ENSG00000111701	APOBEC1	0.134961	0.855915	0.244808
ENSG00000111786	SRSF9	7.34982	7.60357	0.19628
ENSG00000111880	RNGTT	2.6452	2.98917	0.0909715
ENSG00000111911	HINT3	2.88811	3.52885	0.0213099
ENSG00000112031	MTRF1L	3.37491	3.69265	0.115134
ENSG00000112081	SRSF3	8.31068	8.46641	0.285249
ENSG00000112110	MRPL18	5.90473	6.08305	0.366908
ENSG00000112183	RBM24	0.369722	1.34297	0.0488014
ENSG00000112232	KHDRBS2	0.00663386	0.00143553	0.486852
ENSG00000112306	RPS12	10.6404	10.8879	0.764653
ENSG00000112339	HBS1L	5.05868	5.14282	1
ENSG00000112531	QKI	4.82606	4.50842	0.891812
ENSG00000112578	BYSL	4.60707	4.63639	0.934958
ENSG00000112584	FAM120B	2.96948	3.22989	0.285249
ENSG00000112651	MRPL2	5.75556	5.81627	0.934958
ENSG00000112739	PRPF4B	4.63397	4.75097	0.530544
ENSG00000112773	FAM46A	NA	NA	0.530544
ENSG00000112855	HARS2	4.75706	4.81272	0.682951
ENSG00000112941	PAPD7	NA	NA	0.682951
ENSG00000112996	MRPS30	5.02283	5.21843	0.177495
ENSG00000113048	MRPS27	5.12947	5.57221	0.0307823
ENSG00000113240	CLK4	3.99559	3.79446	0.33826
ENSG00000113272	THG1L	3.84557	3.81828	0.848957
ENSG00000113300	CNOT6	4.14822	4.48051	0.128889
ENSG00000113360	DROSHA	5.34263	5.47631	0.891812
ENSG00000113387	SUB1	7.26672	7.73978	0.160023
ENSG00000113407	TARS	7.29965	7.59197	0.461149
ENSG00000113460	BRIX1	5.7117	5.99033	0.260896
ENSG00000113593	PPWD1	4.83706	4.85509	1
ENSG00000113643	RARS	6.00106	6.08566	0.396949
ENSG00000113649	TCERG1	5.68706	5.77707	0.682951
ENSG00000113658	SMAD5	3.78437	3.85513	0.934958
ENSG00000113742	CPEB4	3.03087	3.19375	0.72343
ENSG00000113761	ZNF346	3.32187	3.35621	0.889686
ENSG00000114127	XRN1	2.90329	2.96669	0.91163
ENSG00000114391	RPL24	10.0933	10.4642	0.143842
ENSG00000114416	FXR1	6.28294	6.75442	0.0909715
ENSG00000114503	NCBP2	5.80514	6.32062	0.00660312
ENSG00000114686	MRPL3	6.63795	6.71205	0.604675
ENSG00000114767	RRP9	4.94017	5.0341	0.978303
ENSG00000114784	EIF1B	5.07882	5.67853	0.00542836
ENSG00000114867	EIF4G1	7.82756	7.87391	0.934958
ENSG00000114942	EEF1B2	9.47901	10.0092	0.00115395
ENSG00000115053	NCL	8.42973	8.86254	0.070918
ENSG00000115128	SF3B6	7.18369	7.61823	0.0475244
ENSG00000115211	EIF2B4	4.92425	5.1539	0.19628
ENSG00000115267	IFIH1	3.47829	2.6694	0.00660312
ENSG00000115268	RPS15	10.4038	10.3909	0.848957
ENSG00000115364	MRPL19	5.273	5.51141	0.260896
ENSG00000115421	PAPOLG	2.4359	2.72475	0.0225786
ENSG00000115524	SF3B1	6.77601	7.06868	0.15714
ENSG00000115677	HDLBP	7.57181	7.81646	0.311045
ENSG00000115761	NOL10	4.25959	4.51833	0.237953
ENSG00000115816	CEBPZ	5.16161	5.61807	0.019211
ENSG00000115866	DARS	5.75236	6.0174	0.19628
ENSG00000115875	SRSF7	7.37609	7.55905	0.102507
ENSG00000115946	PNO1	4.30766	4.78194	0.0225786
ENSG00000116001	TIA1	5.34451	5.70512	0.128889
ENSG00000116120	FARSB	4.64741	4.9623	0.0264161
ENSG00000116221	MRPL37	6.25917	6.36788	0.806542
ENSG00000116251	RPL22	9.23414	9.29585	0.978303
ENSG00000116288	PARK7	8.54932	8.42203	0.461149
ENSG00000116350	SRSF4	6.20222	5.69359	0.0115181
ENSG00000116539	ASH1L	3.43395	3.82142	0.0804562
ENSG00000116560	SFPQ	7.62979	7.84093	0.216429
ENSG00000116668	SWT1	0.929515	1.35408	0.0106921
ENSG00000116698	SMG7	4.73718	4.84734	0.396949
ENSG00000116747	TROVE2	3.70875	4.0126	0.160023
ENSG00000116754	SRSF11	7.20286	7.17466	0.848957
ENSG00000116791	CRYZ	4.82581	5.50222	0.070918
ENSG00000116830	TTF2	4.22747	4.04862	0.848957
ENSG00000116874	WARS2	2.77518	2.96062	0.345593
ENSG00000116898	MRPS15	6.46452	6.42599	0.764653
ENSG00000116918	TSNAX	4.57741	4.90479	0.0475244
ENSG00000117133	RPF1	5.07137	5.43148	0.128889
ENSG00000117174	ZNHIT6	4.1442	4.17072	0.806542
ENSG00000117395	EBNA1BP2	7.18805	6.8584	0.604675
ENSG00000117408	IPO13	3.67336	3.31783	0.237953
ENSG00000117419	ERI3	4.95512	4.91992	0.891812
ENSG00000117450	PRDX1	9.10781	9.39864	0.311045
ENSG00000117481	NSUN4	3.92774	3.92048	0.848957
ENSG00000117569	PTBP2	3.01644	3.11975	0.764653
ENSG00000117593	DARS2	4.31525	4.81076	0.0357163
ENSG00000117614	SYF2	5.46599	5.56674	0.764653
ENSG00000117751	PPP1R8	4.8681	4.59087	0.070918
ENSG00000117877	CD3EAP	4.18486	3.6976	0.19628
ENSG00000118181	RPS25	10.277	10.5157	0.72343
ENSG00000118197	DDX59	3.62278	3.69547	0.530544
ENSG00000118246	FASTKD2	4.22061	4.48401	0.0804562
ENSG00000119203	CPSF3	4.79126	5.36087	0.0412823
ENSG00000119285	HEATR1	3.72293	4.03923	0.216429
ENSG00000119314	PTBP3	4.87847	4.9297	0.304706
ENSG00000119392	GLE1	4.46723	4.41753	0.682951
ENSG00000119446	RBM18	3.55413	3.31399	0.143842
ENSG00000119616	FCF1	5.74224	5.58992	0.495228
ENSG00000119705	SLIRP	8.17884	8.21498	0.682951
ENSG00000119707	RBM25	5.87403	5.8209	0.806542
ENSG00000119718	EIF2B2	5.84712	5.96731	0.682951
ENSG00000119812	FAM98A	5.38663	5.86155	0.128889
ENSG00000119917	IFIT3	4.67605	3.01521	0.0162759
ENSG00000119922	IFIT2	3.99818	2.72413	0.102507
ENSG00000119953	SMNDC1	4.53382	4.83408	0.143842
ENSG00000120158	RCL1	3.31773	3.32563	0.978303
ENSG00000120333	MRPS14	4.29925	4.39772	0.428384
ENSG00000120658	ENOX1	0.681863	0.315845	0.374523
ENSG00000120662	MTRF1	3.40734	3.37153	0.955756
ENSG00000120688	WBP4	3.26262	2.99397	0.237953
ENSG00000120693	SMAD9	0.344325	0.414325	0.717599
ENSG00000120699	EXOSC8	5.83886	6.04611	0.891812
ENSG00000120705	ETF1	6.06527	6.20258	0.530544
ENSG00000120727	PAIP2	6.08173	6.56679	0.0162759
ENSG00000120800	UTP20	2.76717	3.22416	0.05451
ENSG00000120948	TARDBP	7.51436	7.36234	0.237953
ENSG00000121057	AKAP1	4.9596	5.42943	0.0622836
ENSG00000121060	TRIM25	5.58358	5.55295	0.848957
ENSG00000121274	PAPD5	NA	NA	0.848957
ENSG00000121390	PSPC1	5.48213	5.47582	0.72343
ENSG00000121486	TRMT1L	3.10672	3.19392	0.72343
ENSG00000121766	ZCCHC17	4.97177	4.80305	0.530544
ENSG00000121774	KHDRBS1	6.11892	6.31791	0.317963
ENSG00000122026	RPL21	10.5434	10.5684	0.848957
ENSG00000122033	MTIF3	5.17871	5.49006	0.285249
ENSG00000122034	GTF3A	6.46984	6.39644	0.848957
ENSG00000122068	FYTTD1	4.4593	4.48461	0.682951
ENSG00000122085	MTERF4	4.52149	4.87692	0.015804
ENSG00000122140	MRPS2	5.73707	5.78785	0.934958
ENSG00000122257	RBBP6	4.46554	4.61891	0.461149
ENSG00000122299	ZC3H7A	4.6283	4.90422	0.428384
ENSG00000122406	RPL5	10.2335	10.5121	0.396949
ENSG00000122435	TRMT13	3.30985	3.44914	0.604675
ENSG00000122566	HNRNPA2B1	9.87159	10.0859	0.143842
ENSG00000122687	MRM2	5.22137	5.05871	0.643345
ENSG00000122729	ACO1	3.90605	4.34742	0.237953
ENSG00000122870	BICC1	1.41198	1.90071	0.359873
ENSG00000122965	RBM19	3.94504	4.43432	0.0264161
ENSG00000123064	DDX54	5.10551	5.44648	0.0622836
ENSG00000123136	DDX39A	6.61273	6.84019	0.311045
ENSG00000123154	WDR83	3.46874	3.58799	0.396949
ENSG00000123200	ZC3H13	4.25209	4.21433	0.461149
ENSG00000123297	TSFM	4.87075	5.59677	0.0005317
ENSG00000123352	SPATS2	4.32484	4.77881	0.160023
ENSG00000123636	BAZ2B	3.73644	4.26024	0.260896
ENSG00000123737	EXOSC9	5.02699	4.90538	0.891812
ENSG00000123908	AGO2	3.64828	3.85958	0.311045
ENSG00000124193	SRSF6	6.7471	6.70808	1
ENSG00000124201	ZNFX1	4.29923	3.90457	0.495228
ENSG00000124214	STAU1	6.03279	6.31424	0.102507
ENSG00000124228	DDX27	5.91758	6.06757	0.311045
ENSG00000124279	FASTKD3	3.8495	4.07796	0.461149
ENSG00000124374	PAIP2B	0.980752	0.948241	0.437318
ENSG00000124380	SNRNP27	5.18167	5.71442	0.0137226
ENSG00000124383	MPHOSPH10	4.57189	4.90244	0.0307823
ENSG00000124541	RRP36	5.4379	5.36323	0.764653
ENSG00000124562	SNRPC	7.2345	7.47816	0.461149
ENSG00000124571	XPO5	4.49099	4.7397	0.428384
ENSG00000124608	AARS2	2.98107	2.88256	0.848957
ENSG00000124614	RPS10	11.098	11.4127	0.285249
ENSG00000124701	APOBEC2	0.0701636	0.0516827	0.341095
ENSG00000124784	RIOK1	3.59702	3.87389	0.428384
ENSG00000124787	RPP40	3.75307	3.88048	0.891812
ENSG00000124788	ATXN1	2.32563	2.53192	0.396949
ENSG00000124789	NUP153	4.11919	4.18461	0.682951
ENSG00000124795	DEK	6.5257	6.47117	0.567058
ENSG00000124802	EEF1E1	5.50595	6.03772	0.160023
ENSG00000124831	LRRFIP1	6.11594	6.17005	0.764653
ENSG00000125107	CNOT1	6.78229	7.09026	0.128889
ENSG00000125207	PIWIL1	0.595118	0.473075	0.759853
ENSG00000125351	UPF3B	4.18133	4.0692	0.806542
ENSG00000125352	RNF113A	3.69872	3.92711	0.396949
ENSG00000125445	MRPS7	6.26204	6.05457	0.311045
ENSG00000125457	MIF4GD	4.55721	4.80779	0.311045
ENSG00000125485	DDX31	3.83342	3.6647	0.222247
ENSG00000125651	GTF2F1	5.58645	5.53619	0.934958
ENSG00000125676	THOC2	5.50512	5.75445	0.461149
ENSG00000125691	RPL23	10.8808	10.8279	1
ENSG00000125743	SNRPD2	8.85796	8.73323	0.764653
ENSG00000125755	SYMPK	5.22129	5.15268	0.806542
ENSG00000125835	SNRPB	7.92114	8.25623	0.366908
ENSG00000125844	RRBP1	6.24277	6.05342	0.604675
ENSG00000125870	SNRPB2	5.91681	5.96404	0.978303
ENSG00000125901	MRPS26	5.41222	5.67013	0.461149
ENSG00000125944	HNRNPR	6.76921	6.97354	0.311045
ENSG00000125970	RALY	7.22942	7.1212	0.461149
ENSG00000125977	EIF2S2	6.98162	7.06509	0.530544
ENSG00000126070	AGO3	2.71328	2.50328	0.396949
ENSG00000126254	RBM42	6.11772	6.11417	0.848957
ENSG00000126461	SCAF1	4.75278	4.56961	0.461149
ENSG00000126524	SBDS	6.33271	6.4405	0.806542
ENSG00000126653	NSRP1	4.8068	4.81638	0.934958
ENSG00000126814	TRMT5	3.48366	3.62448	0.643345
ENSG00000126945	HNRNPH2	5.84135	5.92441	0.848957
ENSG00000126952	NXF5	0.00284296	0.00429244	0.403718
ENSG00000127022	CANX	9.20149	9.27982	0.848957
ENSG00000127054	INTS11	6.43966	6.11955	0.070918
ENSG00000127993	RBM48	3.15286	3.33819	0.461149
ENSG00000128016	ZFP36	4.68246	5.31749	0.102507
ENSG00000128191	DGCR8	4.36353	4.10954	0.260896
ENSG00000128311	TST	4.72005	5.25025	0.237953
ENSG00000128394	APOBEC3F	2.60486	1.69215	0.00660312
ENSG00000128534	LSM8	5.15827	5.46244	0.366908
ENSG00000128626	MRPS12	5.7673	6.18389	0.260896
ENSG00000128739	SNRPN	3.7619	3.30158	0.978303
ENSG00000128829	EIF2AK4	4.57568	4.57985	0.978303
ENSG00000129084	PSMA1	7.4572	7.10601	0.0909715
ENSG00000129245	FXR2	4.10257	4.48292	0.149162
ENSG00000129315	CCNT1	3.40724	3.77975	0.0183547
ENSG00000129317	PUS7L	2.47966	2.59248	0.682951
ENSG00000129351	ILF3	7.02887	7.21321	0.530544
ENSG00000129460	NGDN	5.70533	5.29778	0.143842
ENSG00000129538	RNASE1	3.9709	1.9885	0.0622836
ENSG00000129566	TEP1	3.92057	3.7429	0.72343
ENSG00000129824	RPS4Y1	1.58659	0.918845	0.955756
ENSG00000130119	GNL3L	3.24984	3.53808	0.311045
ENSG00000130227	XPO7	4.66938	4.4655	0.530544
ENSG00000130244	FAM98C	3.73903	4.10172	0.311045
ENSG00000130254	SAFB2	5.11914	5.17382	0.848957
ENSG00000130255	RPL36	9.52769	9.40728	0.604675
ENSG00000130299	GTPBP3	4.61365	4.5796	1
ENSG00000130305	NSUN5	4.93862	4.98047	0.978303
ENSG00000130312	MRPL34	5.6976	5.92962	0.216429
ENSG00000130332	LSM7	7.1036	7.16415	1
ENSG00000130348	QRSL1	2.89215	3.16189	0.359965
ENSG00000130520	LSM4	7.34035	7.78605	0.00542836
ENSG00000130589	HELZ2	4.73778	4.00493	0.019211
ENSG00000130713	EXOSC2	5.5049	5.41231	0.891812
ENSG00000130741	EIF2S3	7.20896	7.44313	0.643345
ENSG00000130749	ZC3H4	3.65422	4.03186	0.160023
ENSG00000130764	LRRC47	4.83627	4.62428	0.260896
ENSG00000130810	PPAN	5.20533	5.22881	0.806542
ENSG00000130811	EIF3G	7.26253	7.19412	0.934958
ENSG00000130816	DNMT1	6.40136	6.11163	0.366908
ENSG00000130826	DKC1	6.35203	6.41848	0.567058
ENSG00000130921	C12orf65	4.00954	4.1204	0.806542
ENSG00000130935	NOL11	5.3926	5.12035	0.396949
ENSG00000130956	HABP4	3.21602	3.52566	0.396949
ENSG00000130985	UBA1	6.78234	6.81171	0.891812
ENSG00000131013	PPIL4	4.08828	4.16767	0.934958
ENSG00000131043	AAR2	4.59848	4.44352	0.366908
ENSG00000131051	RBM39	8.0267	7.85514	0.604675
ENSG00000131368	MRPS25	5.16413	5.39186	0.396949
ENSG00000131469	RPL27	11.186	11.0989	0.72343
ENSG00000131503	ANKHD1	5.74635	6.09639	0.019211
ENSG00000131652	THOC6	4.72589	5.19141	0.070918
ENSG00000131732	ZCCHC9	5.02439	4.82945	0.260896
ENSG00000131773	KHDRBS3	1.58835	1.99104	0.304613
ENSG00000131876	SNRPA1	6.41518	6.53385	0.428384
ENSG00000131914	LIN28A	0.025542	0.0416227	0.863859
ENSG00000132109	TRIM21	4.12568	3.8513	0.177495
ENSG00000132153	DHX30	5.11501	5.37546	0.495228
ENSG00000132275	RRP8	3.70004	3.5589	0.396949
ENSG00000132300	PTCD3	5.19857	5.78616	0.00147089
ENSG00000132313	MRPL35	5.45063	5.86416	0.00660312
ENSG00000132341	RAN	9.79216	9.88767	0.978303
ENSG00000132394	EEFSEC	3.50545	3.4685	0.764653
ENSG00000132463	GRSF1	5.82157	5.91482	0.567058
ENSG00000132466	ANKRD17	4.33784	4.48596	1
ENSG00000132467	UTP3	4.82568	4.73982	0.643345
ENSG00000132478	UNK	3.81064	4.20923	0.530544
ENSG00000132485	ZRANB2	5.78603	5.7298	0.806542
ENSG00000132507	EIF5A	8.93601	9.1768	0.160023
ENSG00000132541	RIDA	4.47487	4.93074	0.0137226
ENSG00000132591	ERAL1	5.33111	5.41231	0.643345
ENSG00000132603	NIP7	5.08077	5.23001	0.604675
ENSG00000132661	NXT1	4.76991	4.44807	0.165437
ENSG00000132676	DAP3	6.73282	7.0236	0.0622836
ENSG00000132740	IGHMBP2	3.52072	3.7143	0.237953
ENSG00000132773	TOE1	3.55044	4.01821	0.0475244
ENSG00000132819	RBM38	3.81292	4.26628	0.216429
ENSG00000132953	XPO4	3.04898	2.99268	0.604675
ENSG00000132972	RNF17	0.0259631	0.0142294	1
ENSG00000133226	SRRM1	5.92426	5.57491	0.160023
ENSG00000133606	MKRN1	5.51487	5.59661	0.848957
ENSG00000133704	IPO8	4.21516	4.67064	0.0264161
ENSG00000133706	LARS	5.65706	6.15326	0.00443532
ENSG00000133773	CCDC59	5.4869	6.12886	0.00360442
ENSG00000133858	ZFC3H1	3.99096	4.72137	0.0137226
ENSG00000134001	EIF2S1	7.6169	7.47854	0.891812
ENSG00000134030	CTIF	2.17556	2.54295	0.530544
ENSG00000134056	MRPS36	4.73671	5.18429	0.0170481
ENSG00000134077	THUMPD3	4.64881	4.93537	0.19628
ENSG00000134186	PRPF38B	5.41939	5.57286	0.33826
ENSG00000134398	ERN2	1.77356	2.41907	0.802848
ENSG00000134419	RPS15A	10.9228	11.4005	0.070918
ENSG00000134440	NARS	6.45859	6.80635	0.495228
ENSG00000134453	RBM17	6.18816	6.49049	0.285249
ENSG00000134597	RBMX2	4.31759	4.37145	0.764653
ENSG00000134627	PIWIL4	1.15448	1.31147	0.802811
ENSG00000134644	PUM1	4.91514	4.99133	1
ENSG00000134684	YARS	6.44979	6.75928	0.366908
ENSG00000134697	GNL2	5.83099	5.72905	0.891812
ENSG00000134698	AGO4	2.63626	2.98496	0.237953
ENSG00000134744	ZCCHC11	NA	NA	0.237953
ENSG00000134748	PRPF38A	4.63415	4.67737	0.891812
ENSG00000134815	DHX34	3.52693	3.51819	0.978303
ENSG00000134874	DZIP1	0.826133	1.35232	0.523455
ENSG00000134905	CARS2	5.4522	5.07343	0.260896
ENSG00000134987	WDR36	3.47066	3.62331	0.260896
ENSG00000135097	MSI1	0.0841468	0.350523	0.557917
ENSG00000135114	OASL	3.62545	2.94757	0.461149
ENSG00000135250	SRPK2	4.14337	4.18645	0.848957
ENSG00000135297	MTO1	4.02109	4.50091	0.0592487
ENSG00000135314	KHDC1	2.81191	2.36353	0.222247
ENSG00000135316	SYNCRIP	6.02264	6.32582	0.285249
ENSG00000135372	NAT10	5.27874	5.20762	0.848957
ENSG00000135387	CAPRIN1	6.80112	6.84363	0.848957
ENSG00000135473	PAN2	4.49538	5.1693	0.102507
ENSG00000135482	ZC3H10	1.33111	1.60234	0.120313
ENSG00000135486	HNRNPA1	10.1662	10.8101	0.00233422
ENSG00000135698	MPHOSPH6	5.44525	5.53669	0.891812
ENSG00000135763	URB2	2.85904	2.96655	1
ENSG00000135828	RNASEL	1.97169	1.69822	0.495228
ENSG00000135829	DHX9	6.78853	6.9748	0.530544
ENSG00000135870	RC3H1	2.21305	2.30755	0.567058
ENSG00000135900	MRPL44	4.42558	4.91431	0.00360442
ENSG00000135930	EIF4E2	6.43542	6.47441	0.934958
ENSG00000135972	MRPS9	4.90293	5.14822	0.0804562
ENSG00000136104	RNASEH2B	5.09345	4.96169	0.604675
ENSG00000136231	IGF2BP3	4.87198	5.32961	0.396949
ENSG00000136243	NUPL2	5.16478	5.13867	0.891812
ENSG00000136261	BZW2	6.40462	6.70217	0.0622836
ENSG00000136270	TBRG4	6.28254	6.37327	0.366908
ENSG00000136271	DDX56	6.04028	5.97611	0.848957
ENSG00000136381	IREB2	4.06689	4.21261	0.495228
ENSG00000136450	SRSF1	7.33751	7.46087	0.643345
ENSG00000136522	MRPL47	5.19903	5.60011	0.0622836
ENSG00000136527	TRA2B	6.92235	7.07028	0.461149
ENSG00000136628	EPRS	5.95432	6.50282	0.00443532
ENSG00000136718	IMP4	6.59219	6.69365	0.174059
ENSG00000136807	CDK9	5.28019	5.20405	0.604675
ENSG00000136875	PRPF4	4.82543	4.66037	0.567058
ENSG00000136897	MRPL50	3.70016	3.89706	0.260896
ENSG00000136937	NCBP1	4.43446	4.30757	0.643345
ENSG00000136942	RPL35	11.0177	10.9681	0.806542
ENSG00000137040	RANBP6	3.49212	3.31473	0.764653
ENSG00000137054	POLR1E	4.13825	4.3826	0.643345
ENSG00000137073	UBAP2	4.40394	4.40305	0.643345
ENSG00000137074	APTX	4.98737	4.97705	0.764653
ENSG00000137154	RPS6	10.1115	10.2056	0.934958
ENSG00000137200	CMTR1	4.31787	4.46627	0.806542
ENSG00000137411	VARS2	4.27051	4.2752	0.764653
ENSG00000137449	CPEB2	1.75047	2.38555	0.128889
ENSG00000137513	NARS2	3.85872	4.23165	0.19628
ENSG00000137547	MRPL15	6.35701	6.32212	0.682951
ENSG00000137574	TGS1	3.5529	3.86442	0.19628
ENSG00000137628	DDX60	3.7191	2.49284	0.0412823
ENSG00000137656	BUD13	4.05126	4.06699	0.933676
ENSG00000137760	ALKBH8	2.80766	2.9444	0.72343
ENSG00000137776	SLTM	6.22823	6.48768	0.143842
ENSG00000137815	RTF1	3.87917	4.09503	0.311045
ENSG00000137818	RPLP1	10.8812	10.9705	1
ENSG00000137834	SMAD6	2.72206	3.42291	0.115134
ENSG00000137876	RSL24D1	5.76923	6.5961	0.000693841
ENSG00000137996	RTCA	4.75163	4.76339	0.934958
ENSG00000138035	PNPT1	4.81724	5.19653	0.33826
ENSG00000138050	THUMPD2	3.37558	3.702	0.0804562
ENSG00000138095	LRPPRC	5.46572	6.11422	0.000693841
ENSG00000138231	DBR1	3.75005	3.87246	0.396949
ENSG00000138303	ASCC1	4.63082	4.80662	0.806542
ENSG00000138326	RPS24	11.4782	11.628	0.643345
ENSG00000138376	BARD1	2.84797	2.8304	0.764653
ENSG00000138382	METTL5	6.13242	6.28252	0.285249
ENSG00000138385	SSB	6.92808	7.17924	0.19628
ENSG00000138399	FASTKD1	4.1153	3.93984	0.366908
ENSG00000138442	WDR12	5.49274	6.1489	2.75334e-05
ENSG00000138593	SECISBP2L	2.7996	3.32821	0.00443532
ENSG00000138668	HNRNPD	7.79743	7.81973	0.764653
ENSG00000138709	LARP1B	3.73845	3.99468	0.19628
ENSG00000138757	G3BP2	5.95844	6.09609	0.72343
ENSG00000138767	CNOT6L	2.6952	2.6026	0.806542
ENSG00000138785	INTS12	3.83276	3.93308	0.978303
ENSG00000139131	YARS2	4.49685	4.57756	0.978303
ENSG00000139168	ZCRB1	5.64243	6.16025	0.00360442
ENSG00000139218	SCAF11	5.00672	5.10092	0.604675
ENSG00000139343	SNRPF	6.01745	6.55041	0.019211
ENSG00000139546	TARBP2	4.89465	5.0518	0.682951
ENSG00000139675	HNRNPA1L2	3.1672	3.20971	0.934958
ENSG00000139718	SETD1B	2.64872	2.89898	0.396949
ENSG00000139726	DENR	5.46007	5.55274	0.530544
ENSG00000139746	RBM26	4.72286	4.56233	0.72343
ENSG00000139767	SRRM4	0.00931613	0.253065	0.905198
ENSG00000139793	MBNL2	4.66385	4.30699	0.19628
ENSG00000139797	RNF113B	0.0104708	0.0155683	0.924905
ENSG00000139910	NOVA1	0.713181	0.683551	0.866271
ENSG00000140105	WARS	7.00981	7.07394	0.891812
ENSG00000140319	SRP14	7.79075	8.05399	0.115134
ENSG00000140395	WDR61	5.79057	5.87393	0.461149
ENSG00000140488	CELF6	0.170567	0.249054	0.955567
ENSG00000140598	EFL1	3.1968	3.54483	0.149162
ENSG00000140694	PARN	4.26413	4.6719	0.0909715
ENSG00000140718	FTO	4.50655	4.96357	0.160023
ENSG00000140829	DHX38	5.37616	5.40806	0.806542
ENSG00000140830	TXNL4B	3.43558	3.732	0.128889
ENSG00000140939	NOL3	4.87498	5.08129	0.848957
ENSG00000140948	ZCCHC14	3.00369	3.67579	0.0162759
ENSG00000140955	ADAD2	0.215822	0.0235923	0.099761
ENSG00000140986	RPL3L	0.110352	0.102563	0.955619
ENSG00000140988	RPS2	10.8802	11.0184	0.643345
ENSG00000141101	NOB1	5.83181	6.21232	0.05451
ENSG00000141378	PTRH2	5.58346	5.46306	0.806542
ENSG00000141499	WRAP53	3.33985	3.3241	0.824374
ENSG00000141543	EIF4A3	6.65825	6.35257	0.115134
ENSG00000141642	ELAC1	1.8265	2.05749	0.637158
ENSG00000141646	SMAD4	2.73893	2.40339	0.848957
ENSG00000141664	ZCCHC2	2.15653	2.26272	0.848957
ENSG00000141759	TXNL4A	5.43435	5.62211	0.461149
ENSG00000141994	DUS3L	4.57758	4.38803	0.285249
ENSG00000142207	URB1	2.95677	2.99645	0.848957
ENSG00000142252	GEMIN7	4.71551	4.47582	0.216429
ENSG00000142528	ZNF473	2.65939	2.63777	0.978303
ENSG00000142534	RPS11	11.221	11.437	0.567058
ENSG00000142541	RPL13A	10.8601	11.0826	0.598147
ENSG00000142544	CTU1	1.79562	1.74751	0.955756
ENSG00000142676	RPL11	10.3994	10.2826	0.285249
ENSG00000142864	SERBP1	7.73998	7.84373	0.682951
ENSG00000142937	RPS8	10.4829	10.5608	0.978303
ENSG00000143194	MAEL	0.0222828	0.00999241	1
ENSG00000143303	RRNAD1	4.65491	4.63828	0.978303
ENSG00000143314	MRPL24	6.12532	6.69838	0.0225786
ENSG00000143319	ISG20L2	4.96001	4.96984	0.806542
ENSG00000143368	SF3B4	5.58848	5.72736	0.495228
ENSG00000143374	TARS2	4.1714	4.65973	0.019211
ENSG00000143436	MRPL9	6.11373	6.44051	0.0909715
ENSG00000143486	EIF2D	5.05531	5.00712	0.978303
ENSG00000143493	INTS7	3.57848	3.75383	0.216429
ENSG00000143569	UBAP2L	6.53885	6.69419	0.567058
ENSG00000143621	ILF2	7.35827	7.5782	0.216429
ENSG00000143624	INTS3	4.36454	4.61828	0.567058
ENSG00000143742	SRP9	7.58335	7.98918	0.0622836
ENSG00000143799	PARP1	6.16029	6.3591	0.495228
ENSG00000143889	HNRNPLL	4.29299	4.53947	0.070918
ENSG00000143947	RPS27A	10.494	10.8841	0.0162759
ENSG00000143977	SNRPG	7.88159	8.18217	0.0475244
ENSG00000144028	SNRNP200	6.41762	6.86525	0.00799141
ENSG00000144029	MRPS5	5.87672	6.17226	0.102507
ENSG00000144045	DQX1	0.72571	0.397704	0.304334
ENSG00000144048	DUSP11	4.27641	4.29091	0.934958
ENSG00000144161	ZC3H8	3.50283	3.65783	0.216429
ENSG00000144218	AFF3	0.254425	0.104179	0.889326
ENSG00000144231	POLR2D	4.66503	4.93432	0.115134
ENSG00000144535	DIS3L2	3.48491	4.00037	0.00799141
ENSG00000144580	CNOT9	4.73224	5.09681	0.0307823
ENSG00000144642	RBMS3	0.815616	0.507742	0.0853902
ENSG00000144713	RPL32	10.586	10.817	0.396949
ENSG00000144736	SHQ1	3.11459	3.06358	0.567058
ENSG00000144895	EIF2A	6.23823	6.29176	0.682951
ENSG00000145191	EIF2B5	5.27357	5.24596	1
ENSG00000145216	FIP1L1	5.54613	5.58494	1
ENSG00000145331	TRMT10A	2.52764	2.46716	0.764653
ENSG00000145388	METTL14	3.61796	3.64233	0.848957
ENSG00000145391	SETD7	4.08429	4.05004	0.848957
ENSG00000145414	NAF1	3.1345	3.37695	0.33826
ENSG00000145425	RPS3A	10.5861	10.6904	0.934958
ENSG00000145592	RPL37	10.828	11.0921	0.160023
ENSG00000145833	DDX46	5.43492	5.4802	0.682951
ENSG00000145907	G3BP1	6.66195	6.57228	0.428384
ENSG00000145912	NHP2	7.65047	8.17057	0.070918
ENSG00000145982	FARS2	2.99898	3.28338	0.260896
ENSG00000146007	ZMAT2	6.64146	6.68919	0.806542
ENSG00000146109	ABT1	3.62438	3.71423	0.682951
ENSG00000146223	RPL7L1	5.84849	6.02581	0.366908
ENSG00000146282	RARS2	4.04532	4.2418	0.304706
ENSG00000146453	PNLDC1	0.149881	0.0529526	0.821931
ENSG00000146676	PURB	3.73347	3.72527	0.978303
ENSG00000146834	MEPCE	4.98765	5.24017	0.216429
ENSG00000146858	ZC3HAV1L	2.28691	2.31952	1
ENSG00000146909	NOM1	3.90529	3.88334	0.891812
ENSG00000147140	NONO	7.995	8.0334	0.643345
ENSG00000147206	NXF3	0.507105	0.345584	0.0668056
ENSG00000147274	RBMX	7.19217	7.52606	0.05451
ENSG00000147403	RPL10	11.1248	11.1701	0.806542
ENSG00000147586	MRPS28	5.57649	5.73982	0.604675
ENSG00000147604	RPL7	11.1346	11.511	0.070918
ENSG00000147669	POLR2K	6.2731	6.64052	0.0264161
ENSG00000147677	EIF3H	8.26863	8.70477	0.00233422
ENSG00000147679	UTP23	3.75303	3.94648	0.366908
ENSG00000147905	ZCCHC7	3.04594	3.32686	0.160023
ENSG00000148090	AUH	3.40502	3.97431	0.0115181
ENSG00000148187	MRRF	5.25057	5.31334	1
ENSG00000148300	REXO4	4.69274	4.67671	0.848957
ENSG00000148584	A1CF	0.0263289	1.34084	0.00202823
ENSG00000148688	RPP30	5.53896	5.6133	0.978303
ENSG00000148840	PPRC1	4.68846	4.81823	0.72343
ENSG00000148843	PDCD11	4.4046	4.68811	0.33826
ENSG00000149016	TUT1	3.96534	4.14587	0.461149
ENSG00000149100	EIF3M	8.64257	8.66726	0.530544
ENSG00000149187	CELF1	5.30743	5.58001	0.0622836
ENSG00000149262	INTS4	4.32222	4.41172	0.260896
ENSG00000149273	RPS3	11.8144	12.0708	0.285249
ENSG00000149289	ZC3H12C	2.54706	2.0598	0.304706
ENSG00000149531	FRG1BP	NA	NA	0.304706
ENSG00000149532	CPSF7	5.77158	5.82491	0.891812
ENSG00000149577	SIDT2	3.49125	3.73311	0.495228
ENSG00000149657	LSM14B	4.94702	5.34684	0.0909715
ENSG00000149658	YTHDF1	5.18477	5.37623	0.177495
ENSG00000149743	TRPT1	5.04298	5.06942	1
ENSG00000149792	MRPL49	5.92959	6.05191	0.802848
ENSG00000149806	FAU	9.51871	9.65614	0.428384
ENSG00000150459	SAP18	6.41396	6.46014	0.806542
ENSG00000150593	PDCD4	4.76145	5.7209	0.0264161
ENSG00000150990	DHX37	3.90255	3.88075	0.978303
ENSG00000151014	NOCT	2.26784	2.10477	0.697691
ENSG00000151065	DCP1B	2.42753	2.20617	0.304613
ENSG00000151247	EIF4E	6.69536	6.6557	0.72343
ENSG00000151304	SRFBP1	3.04376	2.9189	1
ENSG00000151461	UPF2	3.76989	3.98872	0.143842
ENSG00000151576	QTRT2	3.99496	4.29289	0.0475244
ENSG00000151657	KIN	2.50868	2.8511	0.141497
ENSG00000151806	GUF1	3.60999	3.89475	0.260896
ENSG00000151846	PABPC3	1.03292	1.03451	0.889686
ENSG00000151923	TIAL1	6.11611	6.31065	0.237953
ENSG00000151962	RBM46	0.0358777	0.0141064	0.139592
ENSG00000152147	GEMIN6	3.6912	3.97225	0.143842
ENSG00000152332	UHMK1	4.41699	4.85764	0.0475244
ENSG00000152404	CWF19L2	3.00657	2.8835	0.71838
ENSG00000152430	BOLL	0.0614911	0.0472371	0.886952
ENSG00000152464	RPP38	4.01591	4.35202	0.0307823
ENSG00000152518	ZFP36L2	4.27228	4.65053	0.177495
ENSG00000152520	PAN3	3.59125	3.58087	0.934958
ENSG00000152601	MBNL1	5.30363	5.49226	0.389816
ENSG00000152670	DDX4	0.0226275	0.112161	1
ENSG00000152684	PELO	3.51827	3.45308	0.560198
ENSG00000152778	IFIT5	2.7577	2.39918	0.19628
ENSG00000152795	HNRNPDL	7.74837	7.80365	0.643345
ENSG00000152969	JAKMIP1	0.013323	0.229663	0.314891
ENSG00000153015	CWC27	4.38252	4.53825	0.366908
ENSG00000153037	SRP19	6.47371	6.58846	0.764653
ENSG00000153048	CARHSP1	6.19883	6.80059	0.070918
ENSG00000153187	HNRNPU	7.81969	8.18505	0.0264161
ENSG00000153201	RANBP2	4.12398	4.52349	0.0412823
ENSG00000153250	RBMS1	4.8741	4.39101	0.070918
ENSG00000153914	SREK1	5.68081	5.69402	0.891812
ENSG00000153944	MSI2	3.7147	4.55011	0.0264161
ENSG00000154548	SRSF12	0.110506	0.45619	0.0260948
ENSG00000154719	MRPL39	5.08177	5.04079	0.530544
ENSG00000154743	TSEN2	3.86951	4.3555	0.19628
ENSG00000155275	TRMT44	2.95592	2.93448	0.934958
ENSG00000155363	MOV10	5.62231	5.23411	0.216429
ENSG00000155438	NIFK	5.53326	5.87916	0.019211
ENSG00000155506	LARP1	6.15509	6.44609	0.177495
ENSG00000155508	CNOT8	4.9845	5.27837	0.0804562
ENSG00000155636	RBM45	3.06399	3.34079	0.0264161
ENSG00000155846	PPARGC1B	1.15326	1.59609	0.0909715
ENSG00000155858	LSM11	1.53471	1.69178	0.697691
ENSG00000156304	SCAF4	3.92587	3.98247	0.848957
ENSG00000156414	TDRD9	0.232989	0.0807103	0.515764
ENSG00000156482	RPL30	11.4165	11.7921	0.05451
ENSG00000156502	SUPV3L1	4.52668	4.86819	0.0412823
ENSG00000156508	EEF1A1	12.606	13.2099	0.0412823
ENSG00000156697	UTP14A	4.42669	4.47609	0.848957
ENSG00000156976	EIF4A2	8.33052	8.26838	0.72343
ENSG00000156990	RPUSD3	4.6631	4.88037	0.260896
ENSG00000157036	EXOG	2.82694	3.17979	0.102507
ENSG00000157106	SMG1	4.2013	4.4307	0.530544
ENSG00000157110	RBPMS	4.12909	4.49114	0.428384
ENSG00000158042	MRPL17	6.04874	5.89529	0.643345
ENSG00000158163	DZIP1L	1.47711	1.90013	0.61755
ENSG00000158417	EIF5B	5.43261	5.67158	0.216429
ENSG00000158435	CNOT11	4.82187	5.13787	0.0137226
ENSG00000158526	TSR2	5.33361	5.33724	0.891812
ENSG00000158545	ZC3H18	4.78417	4.88896	0.72343
ENSG00000158806	NPM2	1.31386	1.48107	0.597795
ENSG00000158941	CCAR2	6.27893	6.07693	0.604675
ENSG00000159111	MRPL10	5.28117	5.54362	0.216429
ENSG00000159140	SON	6.65694	6.59381	0.530544
ENSG00000159217	IGF2BP1	0.968849	0.536471	0.505149
ENSG00000159409	CELF3	0.0329468	0.609081	0.0649157
ENSG00000160075	SSU72	6.57044	6.52455	0.567058
ENSG00000160193	WDR4	4.54723	4.46649	0.978303
ENSG00000160201	U2AF1	6.27664	6.60226	0.183013
ENSG00000160208	RRP1B	3.80266	4.04731	0.495228
ENSG00000160214	RRP1	4.80966	4.78821	0.977869
ENSG00000160633	SAFB	5.9651	5.96316	0.978303
ENSG00000160679	CHTOP	5.69766	6.03603	0.143842
ENSG00000160710	ADAR	5.8581	6.02397	0.530544
ENSG00000160818	GPATCH4	5.32737	5.57054	0.366908
ENSG00000160862	AZGP1	1.58772	3.37675	0.0197962
ENSG00000160917	CPSF4	5.15374	5.19325	0.739222
ENSG00000161016	RPL8	11.0393	11.4334	0.0804562
ENSG00000161082	CELF5	0.287985	0.488942	0.232664
ENSG00000161265	U2AF1L4	3.50708	3.52478	0.891812
ENSG00000161547	SRSF2	7.73605	7.51884	0.102507
ENSG00000161642	ZNF385A	2.71601	2.22877	0.891812
ENSG00000161654	LSM12	5.32363	5.36073	0.682951
ENSG00000161813	LARP4	4.52172	4.83783	0.149162
ENSG00000161847	RAVER1	4.10894	4.22079	0.604675
ENSG00000161960	EIF4A1	9.23376	9.58462	0.143842
ENSG00000161970	RPL26	10.7873	11.2094	0.260896
ENSG00000161981	SNRNP25	5.48083	5.42857	0.567058
ENSG00000162231	NXF1	5.23958	5.127	0.567058
ENSG00000162244	RPL29	10.1556	10.4781	0.428384
ENSG00000162374	ELAVL4	0.0180162	0.541419	0.907592
ENSG00000162385	MAGOH	6.80468	6.73279	0.806542
ENSG00000162396	PARS2	1.98493	2.06273	0.933676
ENSG00000162408	NOL9	2.64337	2.45396	0.428384
ENSG00000162437	RAVER2	2.5831	2.76737	0.279309
ENSG00000162613	FUBP1	6.406	6.75284	0.05451
ENSG00000162623	TYW3	3.77736	3.82464	0.739222
ENSG00000162639	HENMT1	3.75661	4.22225	0.102507
ENSG00000162664	ZNF326	4.49817	4.3484	0.848957
ENSG00000162775	RBM15	3.10254	3.1748	0.846033
ENSG00000162782	TDRD5	0.42903	0.0670223	0.44231
ENSG00000162851	TFB2M	3.98653	4.53916	0.00233422
ENSG00000162910	MRPL55	5.50765	5.48517	0.977869
ENSG00000162927	PUS10	1.87377	2.32132	0.0225786
ENSG00000162971	TYW5	2.78537	3.05859	0.0804562
ENSG00000163214	DHX57	3.4538	3.67649	0.267165
ENSG00000163239	TDRD10	0.0950831	0.00429244	0.154502
ENSG00000163319	MRPS18C	5.79165	5.56618	0.428384
ENSG00000163412	EIF4E3	1.12046	1.27427	0.824241
ENSG00000163510	CWC22	3.83251	4.09467	0.115134
ENSG00000163577	EIF5A2	2.89745	3.05336	0.495228
ENSG00000163584	RPL22L1	6.26835	6.82217	0.33826
ENSG00000163634	THOC7	6.07707	6.11361	0.848957
ENSG00000163659	TIPARP	4.65157	4.39109	0.311045
ENSG00000163682	RPL9	10.1992	10.6242	0.070918
ENSG00000163684	RPP14	3.17752	3.33802	0.421126
ENSG00000163694	RBM47	4.63251	4.81169	0.33826
ENSG00000163714	U2SURP	6.01567	6.13546	0.604675
ENSG00000163798	SLC4A1AP	4.3223	4.63209	0.019211
ENSG00000163811	WDR43	4.97176	5.3701	0.0412823
ENSG00000163874	ZC3H12A	3.94346	3.30147	0.237953
ENSG00000163877	SNIP1	3.00652	3.02655	0.978303
ENSG00000163882	POLR2H	6.73028	7.08777	0.0475244
ENSG00000163923	RPL39L	4.11153	4.11636	0.891812
ENSG00000163938	GNL3	6.63911	6.93194	0.806542
ENSG00000163950	SLBP	6.05349	5.85504	0.530544
ENSG00000164022	AIMP1	5.3061	5.35428	0.848957
ENSG00000164113	ADAD1	0	0	NA
ENSG00000164163	ABCE1	5.63198	5.37104	0.237953
ENSG00000164167	LSM6	6.26298	6.02058	0.19628
ENSG00000164329	PAPD4	NA	NA	0.19628
ENSG00000164338	UTP15	3.78431	3.89232	0.495228
ENSG00000164342	TLR3	2.15047	1.15683	0.0412823
ENSG00000164346	NSA2	6.93948	7.07154	0.682951
ENSG00000164347	GFM2	4.58594	4.40857	0.366908
ENSG00000164362	TERT	0.961479	0.9419	0.955747
ENSG00000164548	TRA2A	6.32669	6.33298	0.978303
ENSG00000164587	RPS14	11.2791	11.5392	0.177495
ENSG00000164609	SLU7	5.10527	5.54418	0.0225786
ENSG00000164610	RP9	3.91138	3.86895	0.366908
ENSG00000164880	INTS1	5.67808	5.31428	0.0854504
ENSG00000164896	FASTK	5.93742	5.6482	0.128889
ENSG00000164902	PHAX	5.0065	4.93348	0.806542
ENSG00000164934	DCAF13	5.66535	6.09759	0.0264161
ENSG00000164941	INTS8	4.42594	4.8456	0.0630834
ENSG00000164967	RPP25L	4.73011	4.74046	0.978303
ENSG00000164985	PSIP1	4.90186	5.3363	0.366908
ENSG00000165055	METTL2B	4.25392	4.19409	0.806542
ENSG00000165119	HNRNPK	8.74766	8.98582	0.0909715
ENSG00000165209	STRBP	3.91755	3.95129	0.848957
ENSG00000165271	NOL6	4.56711	4.42449	0.72343
ENSG00000165275	TRMT10B	2.64038	2.65701	0.760257
ENSG00000165359	INTS6L	2.11594	2.16101	0.934958
ENSG00000165424	ZCCHC24	1.57814	1.9808	0.933676
ENSG00000165494	PCF11	4.97633	4.96298	0.806542
ENSG00000165496	RPL10L	0.00284296	0	0.462433
ENSG00000165502	RPL36AL	8.50406	8.76052	0.461149
ENSG00000165506	DNAAF2	3.30756	3.51937	0.260896
ENSG00000165526	RPUSD4	4.53505	4.68287	0.260896
ENSG00000165630	PRPF18	3.72763	4.04396	0.311045
ENSG00000165675	ENOX2	2.87852	2.66299	0.128889
ENSG00000165732	DDX21	5.90417	6.19396	0.177495
ENSG00000165733	BMS1	4.02157	4.15409	0.345593
ENSG00000165799	RNASE7	1.30747	0.132376	0.0155632
ENSG00000165819	METTL3	5.53764	5.07159	0.102507
ENSG00000165832	TRUB1	3.63427	4.02389	0.0412823
ENSG00000165934	CPSF2	5.0732	5.13439	0.643345
ENSG00000166024	R3HCC1L	3.28546	3.27829	0.72343
ENSG00000166133	RPUSD2	3.13943	3.24256	0.643345
ENSG00000166166	TRMT61A	3.76832	3.62086	0.311045
ENSG00000166173	LARP6	4.23968	4.45459	0.495228
ENSG00000166181	API5	5.75513	5.8746	0.978303
ENSG00000166197	NOLC1	6.35186	6.73818	0.216429
ENSG00000166441	RPL27A	11.0252	11.1365	0.848957
ENSG00000166783	MARF1	3.37639	4.08877	0.0162759
ENSG00000166831	RBPMS2	0.475319	1.64527	0.0518871
ENSG00000166889	PATL1	4.75542	4.98558	0.567058
ENSG00000166902	MRPL16	5.60907	5.888	0.070918
ENSG00000166938	DIS3L	4.04976	4.01767	0.955756
ENSG00000166949	SMAD3	5.98585	5.30003	0.396949
ENSG00000166986	MARS	7.02726	7.51178	0.216429
ENSG00000167005	NUDT21	6.25657	6.42606	0.495228
ENSG00000167088	SNRPD1	6.71757	7.13278	0.115134
ENSG00000167112	TRUB2	4.63838	4.75514	0.604675
ENSG00000167118	URM1	5.62448	5.61689	0.978303
ENSG00000167136	ENDOG	3.51731	3.42599	0.567058
ENSG00000167264	DUS2	3.80972	3.603	0.505559
ENSG00000167272	POP5	5.53744	5.95901	0.0357163
ENSG00000167447	SMG8	3.4853	3.31555	0.428384
ENSG00000167526	RPL13	11.233	11.5692	0.311045
ENSG00000167658	EEF2	9.35017	9.64395	0.128889
ENSG00000167721	TSR1	4.69991	4.91271	0.366908
ENSG00000167862	MRPL58	5.32403	5.2784	0.889686
ENSG00000167881	SRP68	5.90609	5.89969	0.891812
ENSG00000167962	ZNF598	4.82121	5.10509	0.428384
ENSG00000167978	SRRM2	8.03121	8.60496	0.102507
ENSG00000168002	POLR2G	6.82367	6.90448	0.764653
ENSG00000168028	RPSA	10.6245	10.7789	0.806542
ENSG00000168066	SF1	7.28515	7.32619	0.978303
ENSG00000168101	NUDT16L1	4.58353	4.78597	0.366908
ENSG00000168255	POLR2J3	4.18915	4.12258	0.764653
ENSG00000168438	CDC40	3.07454	3.47729	0.0400934
ENSG00000168488	ATXN2L	6.10619	6.37961	0.396949
ENSG00000168517	HEXIM2	3.0101	3.33563	0.260896
ENSG00000168566	SNRNP48	3.05222	3.31025	0.25539
ENSG00000168724	DNAJC21	5.42176	5.64788	0.643345
ENSG00000168806	LCMT2	2.60736	2.58672	0.933676
ENSG00000168827	GFM1	4.97418	5.06987	0.643345
ENSG00000168872	DDX19A	4.84567	4.95422	0.643345
ENSG00000168883	USP39	5.5816	5.89388	0.0264161
ENSG00000169045	HNRNPH1	8.80188	8.93421	0.530544
ENSG00000169057	MECP2	3.94657	3.91994	0.978303
ENSG00000169062	UPF3A	5.29864	5.3253	0.806542
ENSG00000169180	XPO6	6.036	6.06629	0.978303
ENSG00000169217	CD2BP2	5.19384	5.3262	0.72343
ENSG00000169249	ZRSR2	3.52337	3.41699	0.934958
ENSG00000169251	NMD3	5.27518	5.3641	0.560198
ENSG00000169288	MRPL1	4.59328	4.57867	0.657154
ENSG00000169297	NR0B1	0.0236201	0.47245	0.451882
ENSG00000169371	SNUPN	4.24947	4.42806	0.461149
ENSG00000169385	RNASE2	0.131051	0.0822723	0.251245
ENSG00000169397	RNASE3	0.0167534	0	0.154327
ENSG00000169413	RNASE6	0.124945	0.147797	0.88466
ENSG00000169564	PCBP1	7.42868	7.94265	1.83556e-05
ENSG00000169612	FAM103A1	NA	NA	1.83556e-05
ENSG00000169714	CNBP	7.9974	8.18826	0.128889
ENSG00000169718	DUS1L	6.39084	6.17331	0.177495
ENSG00000169800	RBMY1F	0	0	NA
ENSG00000169813	HNRNPF	7.32325	7.59075	0.19628
ENSG00000169871	TRIM56	3.93606	3.902	1
ENSG00000169957	ZNF768	4.30941	4.73143	0.070918
ENSG00000169972	PUSL1	4.3029	3.70431	0.0115905
ENSG00000169976	SF3B5	6.61102	6.79762	0.396949
ENSG00000170144	HNRNPA3	8.02208	8.30189	0.19628
ENSG00000170365	SMAD1	3.40878	3.53294	0.495228
ENSG00000170445	HARS	5.96462	6.03631	0.643345
ENSG00000170473	PYM1	5.08623	5.5269	0.102507
ENSG00000170515	PA2G4	7.82386	8.25853	0.19628
ENSG00000170748	RBMXL2	0.0265075	0.0099508	0.0535631
ENSG00000170860	LSM3	4.2337	4.4447	0.396949
ENSG00000170889	RPS9	10.6701	10.9339	0.177495
ENSG00000170892	TSEN34	5.6465	5.37556	0.0804562
ENSG00000170935	NCBP2L	0.0123573	0.0142024	1
ENSG00000171103	TRMT61B	3.5433	3.95914	0.0225786
ENSG00000171262	FAM98B	3.45825	3.78067	0.0909715
ENSG00000171311	EXOSC1	5.3794	5.6616	0.285249
ENSG00000171421	MRPL36	6.18833	6.1449	0.682951
ENSG00000171490	RSL1D1	6.97083	7.49771	0.0307823
ENSG00000171566	PLRG1	5.54663	5.43545	0.891812
ENSG00000171824	EXOSC10	5.55816	5.2855	0.19628
ENSG00000171858	RPS21	12.018	12.259	0.260896
ENSG00000171861	MRM3	3.61134	4.03822	0.0475244
ENSG00000171863	RPS7	10.315	10.9174	0.019211
ENSG00000171865	RNASEH1	4.4722	4.81594	0.115134
ENSG00000171960	PPIH	6.14357	6.16913	0.72343
ENSG00000172053	QARS	7.18746	7.41755	0.33826
ENSG00000172062	SMN1	5.18763	5.47338	0.0622836
ENSG00000172071	EIF2AK3	3.12339	3.41145	0.143842
ENSG00000172171	TEFM	3.73873	3.59922	0.604675
ENSG00000172172	MRPL13	5.78086	6.02201	0.237953
ENSG00000172183	ISG20	4.3777	4.5006	0.806542
ENSG00000172239	PAIP1	5.69232	5.97502	0.160023
ENSG00000172336	POP7	5.79053	5.88766	0.567058
ENSG00000172346	CSDC2	0.096077	0.315008	0.373509
ENSG00000172409	CLP1	4.06683	3.93654	0.682951
ENSG00000172432	GTPBP2	5.50068	5.58629	0.978303
ENSG00000172493	AFF1	3.17541	3.27833	0.72343
ENSG00000172590	MRPL52	7.45756	6.92477	0.0357163
ENSG00000172667	ZMAT3	1.90929	2.01154	0.237953
ENSG00000172733	PURG	0.0327949	0.033684	0.977225
ENSG00000172795	DCP2	3.43149	3.51259	0.530544
ENSG00000172809	RPL38	10.7987	10.755	0.682951
ENSG00000172922	RNASEH2C	4.95651	5.00858	0.848957
ENSG00000173113	TRMT112	8.10511	8.33609	0.428384
ENSG00000173141	MRPL57	4.26586	4.08448	0.396949
ENSG00000173145	NOC3L	3.70002	3.8393	0.934958
ENSG00000173431	RNASE8	0.0202197	0	0.154327
ENSG00000173464	RNASE11	0	0	NA
ENSG00000173545	ZNF622	4.76895	5.05152	0.461149
ENSG00000173627	APOBEC4	0.0300638	0.00999241	0.136129
ENSG00000173674	EIF1AX	6.06877	6.09471	0.891812
ENSG00000173681	CXorf23	NA	NA	0.891812
ENSG00000173744	AGFG1	5.2184	5.44964	0.177495
ENSG00000173786	CNP	5.09356	4.93793	0.461149
ENSG00000173809	TDRD12	0.118862	0.0573854	0.0939167
ENSG00000173812	EIF1	8.84171	9.04005	0.285249
ENSG00000173818	ENDOV	3.98293	3.95088	0.495228
ENSG00000173914	RBM4B	4.35731	4.34808	0.934958
ENSG00000173933	RBM4	6.97328	7.23532	0.128889
ENSG00000174173	TRMT10C	4.62074	4.66639	0.934958
ENSG00000174177	CTU2	3.88287	3.9137	0.643345
ENSG00000174231	PRPF8	6.51498	6.58417	0.530544
ENSG00000174243	DDX23	6.0397	6.29273	0.128889
ENSG00000174371	EXO1	3.53583	3.65149	0.495228
ENSG00000174444	RPL4	11.3215	11.6188	0.19628
ENSG00000174547	MRPL11	6.38682	6.61395	0.428384
ENSG00000174606	ANGEL2	3.72828	3.96123	0.222247
ENSG00000174720	LARP7	5.16057	5.08651	0.495228
ENSG00000174740	PABPC5	0.00095702	0.00569996	0.325634
ENSG00000174748	RPL15	10.5768	10.8111	0.33826
ENSG00000174780	SRP72	5.758	5.86621	0.682951
ENSG00000174840	PDE12	3.28001	3.78657	0.0622836
ENSG00000174891	RSRC1	4.89527	4.83113	0.978303
ENSG00000174953	DHX36	5.34367	5.26522	0.806542
ENSG00000175110	MRPS22	5.82985	5.89189	0.891812
ENSG00000175324	LSM1	5.38564	5.69202	0.260896
ENSG00000175376	EIF1AD	5.20242	5.12307	0.260896
ENSG00000175387	SMAD2	4.9202	5.19635	0.285249
ENSG00000175467	SART1	5.38376	5.28449	0.311045
ENSG00000175573	C11orf68	5.31781	4.93982	0.366908
ENSG00000175581	MRPL48	5.22217	5.72962	0.0137226
ENSG00000175718	RBMXL3	0	0	NA
ENSG00000175766	EIF4E1B	0.00756368	0.0196711	0.418888
ENSG00000175792	RUVBL1	6.22867	6.33366	0.72343
ENSG00000176102	CSTF3	5.24194	5.04717	0.260896
ENSG00000176444	CLK2	5.02828	5.23102	0.311045
ENSG00000176624	MEX3C	3.26281	3.86159	0.33826
ENSG00000177192	PUS1	4.82988	5.05131	0.461149
ENSG00000177469	CAVIN1	5.99433	4.4831	0.019211
ENSG00000177483	RBM44	0.305368	0.341735	0.933586
ENSG00000177600	RPLP2	9.89925	10.0235	0.978303
ENSG00000177613	CSTF2T	3.60388	3.76145	0.33826
ENSG00000177700	POLR2L	7.87039	7.78932	0.72343
ENSG00000177733	HNRNPA0	4.48109	4.69082	0.285249
ENSG00000177954	RPS27	11.5389	12.0442	0.0162759
ENSG00000177971	IMP3	5.69907	5.74211	0.806542
ENSG00000178105	DDX10	4.54273	5.03359	0.260896
ENSG00000178149	DALRD3	4.24548	4.63775	0.070918
ENSG00000178199	ZC3H12D	0.110301	0.714621	0.0799436
ENSG00000178607	ERN1	2.97045	3.32887	0.33826
ENSG00000178691	SUZ12	4.40386	4.60046	0.260896
ENSG00000178694	NSUN3	2.66845	3.07615	0.00911814
ENSG00000178718	RPP25	3.29856	3.77118	0.396949
ENSG00000178896	EXOSC4	5.1937	5.53879	0.0804562
ENSG00000178952	TUFM	7.31839	7.53987	0.389816
ENSG00000178982	EIF3K	8.14166	8.42582	0.461149
ENSG00000179041	RRS1	5.07362	5.30054	0.495228
ENSG00000179115	FARSA	6.01766	5.96296	1
ENSG00000179134	SAMD4B	5.96889	6.3294	0.396949
ENSG00000179151	EDC3	4.69491	4.57146	0.495228
ENSG00000179172	HNRNPCL1	0.128624	0.165078	0.38826
ENSG00000179218	CALR	9.61907	8.96904	0.00799141
ENSG00000179299	NSUN7	1.49179	1.80443	0.389816
ENSG00000179300	RTL3	0.0121072	0.00143553	0.301413
ENSG00000179335	CLK3	5.47677	5.29546	0.311045
ENSG00000179409	GEMIN4	3.84381	3.95157	0.530544
ENSG00000179455	MKRN3	0.587629	0.222478	0.866245
ENSG00000179598	PLD6	1.74907	2.11625	0.260896
ENSG00000179912	R3HDM2	4.07365	4.50944	0.0909715
ENSG00000179950	PUF60	6.93838	7.12063	0.530544
ENSG00000179988	PSTK	2.03013	2.46862	0.0804562
ENSG00000180098	TRNAU1AP	4.23565	3.73541	0.070918
ENSG00000180113	TDRD6	0.150362	0.133317	0.911255
ENSG00000180228	PRKRA	4.71229	4.97195	0.141497
ENSG00000180574	AC068775.1	NA	NA	0.141497
ENSG00000180917	CMTR2	3.97037	4.19813	0.72343
ENSG00000180992	MRPL14	5.93466	5.96143	0.934958
ENSG00000181026	AEN	4.2803	4.45987	0.505559
ENSG00000181163	NPM1	10.9732	11.3388	0.160023
ENSG00000181222	POLR2A	5.21131	5.43598	0.567058
ENSG00000181381	DDX60L	4.69926	2.85793	0.000302255
ENSG00000181588	MEX3D	3.30596	3.07304	0.237953
ENSG00000181610	MRPS23	6.35127	6.3742	0.891812
ENSG00000181817	LSM10	5.15821	5.22652	0.806542
ENSG00000181991	MRPS11	5.52687	5.63572	0.461149
ENSG00000182004	SNRPE	7.22186	7.56081	0.160023
ENSG00000182117	NOP10	7.60745	7.95054	0.143842
ENSG00000182134	TDRKH	2.63152	3.23148	0.0804562
ENSG00000182154	MRPL41	5.30572	5.25149	0.934958
ENSG00000182173	TSEN54	5.02484	4.75656	0.19628
ENSG00000182180	MRPS16	6.0454	6.35532	0.174059
ENSG00000182196	ARL6IP4	7.06419	7.1938	0.33826
ENSG00000182545	RNASE10	0.223612	0.215594	0.824074
ENSG00000182774	RPS17	11.6359	11.6559	0.891812
ENSG00000182810	DDX28	3.44071	3.59688	0.567058
ENSG00000182872	RBM10	4.44563	4.6571	0.260896
ENSG00000182899	RPL35A	10.4362	11.0809	0.00147089
ENSG00000182934	SRPRA	6.21717	6.31557	0.934958
ENSG00000182944	EWSR1	7.60287	7.69177	0.72343
ENSG00000182973	CNOT10	4.29437	4.67389	0.05451
ENSG00000183011	NAA38	5.64076	6.00576	0.0804562
ENSG00000183207	RUVBL2	6.8869	6.76351	0.891812
ENSG00000183258	DDX41	6.54882	6.80875	0.177495
ENSG00000183431	SF3A3	5.93352	5.92087	0.848957
ENSG00000183496	MEX3B	0.375761	0.711765	0.143842
ENSG00000183520	UTP11	5.37095	5.51565	0.604675
ENSG00000183570	PCBP3	0.0609417	0.100582	0.353495
ENSG00000183617	MRPL54	5.31602	5.48795	0.311045
ENSG00000183665	TRMT12	3.37885	3.31463	0.677333
ENSG00000183684	ALYREF	6.8534	6.72544	0.643345
ENSG00000183751	TBL3	5.18754	5.23888	0.848957
ENSG00000183808	RBM12B	3.52106	3.76734	0.070918
ENSG00000184083	FAM120C	1.79242	1.8527	0.682951
ENSG00000184110	EIF3C	7.63115	8.02609	0.0307823
ENSG00000184209	SNRNP35	4.4024	4.55223	0.19628
ENSG00000184220	CMSS1	5.22873	5.35156	0.530544
ENSG00000184571	PIWIL3	0.00573269	0	0.0509137
ENSG00000184575	XPOT	4.90994	6.03335	0.00233422
ENSG00000184672	RALYL	0.00571401	0.22091	0.13651
ENSG00000184708	EIF4ENIF1	3.54001	3.37889	0.366908
ENSG00000184735	DDX53	0.00287106	0.00999241	0.217499
ENSG00000184863	RBM33	4.27005	4.49729	0.177495
ENSG00000184898	RBM43	1.55918	1.72372	0.848957
ENSG00000184924	PTRHD1	4.46557	5.17358	0.0005317
ENSG00000184967	NOC4L	4.31354	4.22245	0.567058
ENSG00000185085	INTS5	3.68957	3.69375	0.891812
ENSG00000185088	RPS27L	6.01104	6.71858	0.0622836
ENSG00000185129	PURA	2.72998	2.79349	0.978303
ENSG00000185163	DDX51	3.98999	4.05119	0.891812
ENSG00000185246	PRPF39	4.41356	4.3352	0.366908
ENSG00000185272	RBM11	0.660093	0.600271	0.559745
ENSG00000185414	MRPL30	4.45314	4.8597	0.0115181
ENSG00000185418	TARSL2	1.5873	1.87078	0.311045
ENSG00000185608	MRPL40	4.78812	4.96306	0.604675
ENSG00000185650	ZFP36L1	6.46433	6.00773	0.530544
ENSG00000185721	DRG1	5.99143	5.87011	0.567058
ENSG00000185728	YTHDF3	4.38435	4.63221	0.102507
ENSG00000185736	ADARB2	0.0112207	0.347459	0.195538
ENSG00000185745	IFIT1	4.00232	2.80662	0.19628
ENSG00000185946	RNPC3	3.5529	3.5235	1
ENSG00000186416	NKRF	3.18536	3.19646	0.934958
ENSG00000186468	RPS23	11.8385	12.167	0.216429
ENSG00000186566	GPATCH8	3.96261	3.87623	0.40529
ENSG00000186666	BCDIN3D	1.78429	1.95285	0.389816
ENSG00000186834	HEXIM1	5.2112	4.65476	0.070918
ENSG00000187024	PTRH1	4.24385	3.83836	0.0225786
ENSG00000187051	RPS19BP1	6.45823	6.34276	0.604675
ENSG00000187191	DAZ3	0.185494	0.00143553	0.859684
ENSG00000187556	NANOS3	0.684253	0.363617	0.0349028
ENSG00000187742	SECISBP2	4.35199	4.59127	0.285249
ENSG00000187772	LIN28B	0.100806	0.221552	0.352564
ENSG00000187959	CPSF4L	0.0550227	0.0950323	0.531716
ENSG00000187969	ZCCHC13	0	0	NA
ENSG00000188120	DAZ1	0.274147	0.00572797	0.602248
ENSG00000188177	ZC3H6	1.23746	1.54962	0.267165
ENSG00000188425	NANOS2	0.00191404	0.00709388	0.632142
ENSG00000188573	FBLL1	0.280807	0.602375	0.453255
ENSG00000188613	NANOS1	2.49496	2.04762	0.396949
ENSG00000188655	RNASE9	0.00095702	0.00285692	0.768278
ENSG00000188739	RBM34	5.78239	6.08623	0.115134
ENSG00000188846	RPL14	9.75398	10.0373	0.237953
ENSG00000188917	TRMT2B	3.45115	3.43146	0.604675
ENSG00000188976	NOC2L	6.27795	6.01771	0.216429
ENSG00000189007	ADAT2	2.91449	2.97106	0.91163
ENSG00000189091	SF3B3	6.66115	6.91918	0.216429
ENSG00000189266	PNRC2	5.84614	5.98087	0.495228
ENSG00000189306	RRP7A	5.15572	4.94588	0.428384
ENSG00000196116	TDRD7	3.17764	3.14936	0.848957
ENSG00000196141	SPATS2L	7.05598	7.22841	0.366908
ENSG00000196235	SUPT5H	6.12392	6.0064	0.530544
ENSG00000196305	IARS	6.13456	6.41566	0.33826
ENSG00000196361	ELAVL3	0.0408969	0.0808253	0.0887234
ENSG00000196363	WDR5	4.99301	4.85561	0.567058
ENSG00000196365	LONP1	5.469	5.79544	0.33826
ENSG00000196419	XRCC6	8.09336	7.9418	0.495228
ENSG00000196449	YRDC	4.20726	4.23565	0.764653
ENSG00000196497	IPO4	5.23395	4.86413	0.682951
ENSG00000196504	PRPF40A	5.88638	6.09845	0.143842
ENSG00000196664	TLR7	0.0260469	0.0153039	0.943994
ENSG00000196678	ERI2	3.93782	3.99832	0.806542
ENSG00000196793	ZNF239	1.85096	2.83402	0.0804562
ENSG00000196943	NOP9	3.97774	3.50398	0.0909715
ENSG00000197102	DYNC1H1	7.39093	7.26464	0.764653
ENSG00000197111	PCBP2	8.51638	9.05109	0.00185881
ENSG00000197114	ZGPAT	4.80672	4.65179	0.643345
ENSG00000197157	SND1	6.41844	6.56672	0.643345
ENSG00000197181	PIWIL2	0.190674	0.616661	0.0244765
ENSG00000197223	C1D	5.03469	5.46496	0.00443532
ENSG00000197345	MRPL21	6.59346	6.76267	0.260896
ENSG00000197381	ADARB1	2.42926	2.01984	0.0804562
ENSG00000197451	HNRNPAB	7.3473	7.61264	0.177495
ENSG00000197498	RPF2	4.48415	4.70545	0.530544
ENSG00000197728	RPS26	9.10248	9.43788	0.285249
ENSG00000197756	RPL37A	11.5153	11.9973	0.00961649
ENSG00000197958	RPL12	10.6602	10.8068	0.934958
ENSG00000197976	AKAP17A	4.42733	4.20881	0.72343
ENSG00000198000	NOL8	4.65062	4.67554	0.848957
ENSG00000198015	MRPL42	5.68258	6.27535	0.00660312
ENSG00000198034	RPS4X	10.5558	10.6866	0.604675
ENSG00000198042	MAK16	3.49563	3.77231	0.428384
ENSG00000198056	PRIM1	4.66906	5.05585	0.160023
ENSG00000198231	DDX42	6.44274	6.17413	0.260896
ENSG00000198242	RPL23A	10.4292	10.5526	0.567058
ENSG00000198265	HELZ	2.88477	2.82642	1
ENSG00000198492	YTHDF2	5.2542	5.07806	0.311045
ENSG00000198585	NUDT16	3.45294	3.73547	0.0229234
ENSG00000198692	EIF1AY	1.02359	0.162707	0.824074
ENSG00000198700	IPO9	4.48173	4.542	0.978303
ENSG00000198755	RPL10A	9.80691	10.2093	0.0225786
ENSG00000198791	CNOT7	5.39028	5.33006	0.764653
ENSG00000198860	TSEN15	4.63763	4.98082	0.311045
ENSG00000198874	TYW1	3.64006	3.89195	0.183013
ENSG00000198900	TOP1	6.00156	6.48584	0.0264161
ENSG00000198917	SPOUT1	4.7592	4.56418	0.530544
ENSG00000198918	RPL39	11.4988	11.679	0.567058
ENSG00000198919	DZIP3	2.47341	2.80396	0.505559
ENSG00000198952	SMG5	5.39208	5.51348	0.33826
ENSG00000203791	EEF1AKMT2	3.80208	4.27793	0.0804562
ENSG00000203867	RBM20	0.0904303	0.486993	0.0198572
ENSG00000204010	IFIT1B	0.0237202	0.00714936	0.0266936
ENSG00000204316	MRPL38	5.59365	5.32479	0.143842
ENSG00000204352	C9orf129	0.107424	0.220586	0.5556
ENSG00000204764	RANBP17	1.73251	1.5697	0.760078
ENSG00000204822	MRPL53	5.47455	5.88894	0.0475244
ENSG00000204842	ATXN2	4.95278	5.16621	0.19628
ENSG00000205022	PABPN1L	0.00759052	0.0454071	0.905086
ENSG00000205323	SARNP	6.70349	7.30596	0.0162759
ENSG00000205339	IPO7	5.90718	5.97604	0.891812
ENSG00000205571	SMN2	5.4201	5.47382	0.461149
ENSG00000205609	EIF3CL	5.94516	6.47237	0.0264161
ENSG00000205916	DAZ4	0.100053	0	0.462433
ENSG00000205937	RNPS1	7.07071	7.24914	0.428384
ENSG00000205944	DAZ2	0.0108999	0	0.462433
ENSG00000205978	NYNRIN	1.73647	0.772823	0.0326789
ENSG00000206150	RNASE13	0.0497184	0.0238004	0.444599
ENSG00000206268	NELFE	6.33561	6.38903	0.567058
ENSG00000206412	GNL1	5.23422	5.17931	0.891812
ENSG00000206476	VARSL	NA	NA	0.891812
ENSG00000206486	DHX16	5.22442	5.10931	0.643345
ENSG00000206491	PRR3	3.29163	3.42644	0.764653
ENSG00000206557	TRIM71	0.00761862	0.0447407	0.0176287
ENSG00000211460	TSN	5.2344	5.71193	0.00660312
ENSG00000212643	ZRSR1	NA	NA	0.00660312
ENSG00000213079	SCAF8	3.41619	3.73207	0.115134
ENSG00000213246	SUPT4H1	6.14794	6.24862	1
ENSG00000213339	QTRT1	5.09981	4.96496	0.806542
ENSG00000213516	RBMXL1	2.8547	3.15997	0.366908
ENSG00000213523	SRA1	4.84664	5.00058	0.366908
ENSG00000213638	ADAT3	1.96584	1.81852	0.848957
ENSG00000213741	RPS29	12.0264	12.2726	0.260896
ENSG00000213782	DDX47	6.28305	5.71928	0.019211
ENSG00000214022	REPIN1	5.53232	6.1939	0.0622836
ENSG00000214026	MRPL23	6.46614	7.03858	0.019211
ENSG00000214274	ANG	1.69884	2.90461	0.00233422
ENSG00000214575	CPEB1	0.0389197	0.0443945	0.587761
ENSG00000214753	HNRNPUL2	5.30646	5.73182	0.0225786
ENSG00000214944	ARHGEF28	3.98397	3.95967	0.764653
ENSG00000215251	FASTKD5	3.47071	3.79426	0.216429
ENSG00000215301	DDX3X	6.82929	7.05097	0.33826
ENSG00000218819	TDRD15	0	0.154597	0.252999
ENSG00000218823	PAPOLB	0.00095702	0.00143553	0.813505
ENSG00000218891	ZNF579	3.16435	3.01615	0.317963
ENSG00000219200	RNASEK	7.27964	7.59534	0.428384
ENSG00000221983	UBA52	10.0844	9.97501	0.72343
ENSG00000223493	SKIV2L	5.1517	4.72923	0.0622836
ENSG00000223496	EXOSC6	2.86862	3.1601	0.149162
ENSG00000223775	MRPS18B	5.95757	6.32746	0.0909715
ENSG00000224470	ATXN1L	3.62069	3.65359	0.72343
ENSG00000224979	LSM2	5.8065	5.95001	0.682951
ENSG00000225921	NOL7	5.70657	6.12229	0.160023
ENSG00000225989	ABCF1	5.88626	5.61943	0.428384
ENSG00000226225	RPS18	11.5656	11.9912	0.19628
ENSG00000226941	RBMY1J	0	0	NA
ENSG00000227057	WDR46	5.50461	5.40923	0.495228
ENSG00000228049	POLR2J2	1.64592	1.34825	0.317963
ENSG00000229117	RPL41	11.9241	12.2598	0.0804562
ENSG00000229474	PATL2	0.785869	0.854687	0.848957
ENSG00000232119	MCTS1	5.92254	5.91333	0.891812
ENSG00000233927	RPS28	8.85669	8.94479	0.530544
ENSG00000234414	RBMY1A1	0.00190461	0	0.462433
ENSG00000235291	PPP1R10	4.29324	4.80781	0.00961649
ENSG00000236765	DXO	3.95587	4.07817	0.848957
ENSG00000237889	DDX39B	8.2763	8.08351	0.396949
ENSG00000239306	RBM14	5.33733	5.37988	0.848957
ENSG00000239713	APOBEC3G	2.79991	1.67999	0.0412823
ENSG00000239789	MRPS17	4.30055	4.39461	0.764653
ENSG00000240344	PPIL3	4.9305	5.11265	0.311045
ENSG00000240563	L1TD1	0.00669914	0.00429244	0.290896
ENSG00000240682	ISY1	4.80256	4.75379	0.891812
ENSG00000241058	NSUN6	2.54393	3.11747	0.00961649
ENSG00000241863	RPP21	5.7635	5.76669	0.891812
ENSG00000241945	PWP2	2.19819	2.24297	0.848957
ENSG00000241962	AC079447.1	NA	NA	0.848957
ENSG00000242265	PEG10	6.12505	5.09676	0.285249
ENSG00000242372	EIF6	8.17803	8.0727	0.530544
ENSG00000242389	RBMY1E	0	0	NA
ENSG00000242485	MRPL20	7.25807	7.18732	0.523455
ENSG00000242875	RBMY1B	0.00190461	0	0.462433
ENSG00000243147	MRPL33	7.39891	7.67285	0.33826
ENSG00000243501	AL365232.1	NA	NA	0.33826
ENSG00000243927	MRPS6	5.95537	6.73637	0.177495
ENSG00000244395	RBMY1D	0	0	NA
ENSG00000244462	RBM12	5.25804	5.29093	0.891812
ENSG00000247626	MARS2	2.85097	3.19512	0.160023
ENSG00000253626	EIF5AL1	1.18943	1.18188	0.637222
ENSG00000253729	PRKDC	6.62713	6.81268	0.495228
ENSG00000253797	UTP14C	3.0935	3.2279	0.495228
ENSG00000254093	PINX1	NA	NA	0.495228
ENSG00000254535	PABPC4L	0.0258596	0.0215989	0.766381
ENSG00000254536	AL360181.3	NA	NA	0.766381
ENSG00000254726	MEX3A	1.10237	1.72868	0.285249
ENSG00000254772	EEF1G	10.5142	10.787	0.177495
ENSG00000256453	DND1	0.365767	0.371492	0.955721
ENSG00000257218	GATC	3.72967	4.09249	0.0307823
ENSG00000258436	RNASE12	0.00377224	0	0.462433
ENSG00000258818	RNASE4	1.5398	2.31486	0.15714
ENSG00000259494	MRPL46	5.05993	5.19021	0.764653
ENSG00000260537	AC012184.2	NA	NA	0.764653
ENSG00000261236	BOP1	5.69526	5.96516	0.428384
ENSG00000262814	MRPL12	6.62442	6.56108	0.764653
ENSG00000262860	LSM14A	5.8606	6.07764	0.643345
ENSG00000265681	RPL17	10.5915	10.9551	0.366908
ENSG00000266967	AARSD1	5.51507	5.3749	0.396949
ENSG00000268439	EMG1	NA	NA	0.396949
ENSG00000269058	CALR3	0.0771137	0.146428	0.635723
ENSG00000269437	NXF2B	0.0932787	0.00429244	0.65639
ENSG00000269547	AC011455.3	NA	NA	0.65639
ENSG00000269955	C7orf55-LUC7L2	NA	NA	0.65639
ENSG00000255561	FDXACB1	1.6221	1.79365	0.461149
ENSG00000167281	RBFOX3	0.173958	0.116844	0.867429
ENSG00000189369	GSPT2	2.35524	2.78289	0.530544
ENSG00000117360	PRPF3	5.36472	5.53209	0.530544
ENSG00000068394	GPKOW	4.22526	4.55973	0.192303
ENSG00000155966	AFF2	0.0497984	0.157148	0.662755
ENSG00000108771	DHX58	3.18947	2.30691	0.070918
ENSG00000102021	LUZP4	0.00753558	0.00287106	0.827983
ENSG00000177679	SRRM3	0.664923	1.92474	0.00360442
ENSG00000148303	RPL7A	10.8997	11.0013	0.72343
ENSG00000150773	PIH1D2	1.53054	1.25049	0.33826
ENSG00000110367	DDX6	4.82852	4.98269	0.682951
ENSG00000186288	PABPC1L2A	0	0	NA
ENSG00000184388	PABPC1L2B	0	0.00285692	0.252999
ENSG00000270647	TAF15	7.46007	7.46612	0.891812
ENSG00000280969	RPS4Y2	0.00284296	0	0.462433
ENSG00000106682	EIF4H	8.1092	8.10053	0.806542
ENSG00000068438	FTSJ1	5.61175	5.43107	0.530544
ENSG00000148296	SURF6	4.6081	4.72174	0.806542
ENSG00000109536	FRG1	4.79849	5.12941	0.366908
ENSG00000241343	RPL36A	11.0366	11.1848	0.848957
ENSG00000150316	CWC15	5.85499	5.87797	0.934958
ENSG00000188529	SRSF10	6.65528	6.85099	0.461149
ENSG00000263465	SRSF8	4.76704	5.17151	0.0400934
ENSG00000083896	YTHDC1	5.52785	5.34949	0.374707
ENSG00000278023	RDM1	2.71023	2.4949	0.824374
ENSG00000268629	TEX13A	0.00380922	0	0.262476
ENSG00000278053	DDX52	4.37756	3.85555	0.070918
ENSG00000275183	LENG9	2.27147	2.28712	0.848957
ENSG00000269405	NXF2	0.0233759	0	0.154079
ENSG00000247315	ZCCHC3	3.18175	3.52732	0.260896
ENSG00000278845	MRPL45	5.33922	5.46333	0.806542
ENSG00000273559	CWC25	4.26933	3.98173	0.0909715
ENSG00000278619	MRM1	3.21801	3.14342	0.72343
ENSG00000278229	RPS17L	NA	NA	0.72343
ENSG00000108654	DDX5	8.85421	8.66735	0.764653
ENSG00000259956	RBM15B	3.72802	3.96461	0.192303
ENSG00000266472	MRPS21	5.74316	6.0213	0.177495
ENSG00000265241	RBM8A	7.35484	7.66855	0.143842
ENSG00000272886	DCP1A	3.03881	3.43782	0.237953
