# Supplementary material for: RNA Binding Proteins as Drivers and Therapeutic Target Candidates in Pancreatic Ductal Adenocarcinoma
Source: Int J Mol Sci. 2020 Jun 11;21(11):4190. doi: 10.3390/ijms21114190 (PMC7312628; doi:10.3390/ijms21114190)
Supplement: Supplementary file 1 [file ijms-21-04190-s001.zip › S6.xlsx]

## Sheet: Tabelle1
Gene Ontology Molecular Function
GOID	GOTerm	Nr. Genes	% Associated Genes	Term PValue	Term PValue Corrected with Benjamini-Hochberg	Associated Genes Found
GO:0003723	RNA binding	34	1.6907	2.46102e-24	5.36502e-22	[ANG, APOBEC1, BRCA1, BZW1, CD3EAP, DDX53, DDX6, DDX60, DDX60L, DQX1, EIF6, IFIT2, IGF2BP1, IGF2BP2, IGF2BP3, LRRFIP1, MRPL13, MRPL14, NOP10, OAS1, OAS2, OAS3, OASL, PIWIL1, PRDX1, PTBP3, RBM34, RBMS1, RBMS2, RNASE7, RNASEH2A, SNRPD1, SPATS2L, ZNFX1]
GO:0004540	ribonuclease activity	11	6.74847	1.37235e-13	1.49586e-11	[ANG, ERN2, EXO1, OAS1, OAS2, OAS3, OASL, PIWIL1, RNASE10, RNASE7, RNASEH2A]
GO:0004518	nuclease activity	11	3.78007	7.56571e-11	5.49775e-09	[ANG, ERN2, EXO1, OAS1, OAS2, OAS3, OASL, PIWIL1, RNASE10, RNASE7, RNASEH2A]
GO:0060700	regulation of ribonuclease activity	4	33.3333	1.49774e-08	6.53016e-07	[OAS1, OAS2, OAS3, OASL]
GO:0001730	2'-5'-oligoadenylate synthetase activity	3	100	1.35104e-08	7.36314e-07	[OAS1, OAS2, OAS3]
GO:0003725	double-stranded RNA binding	6	7.14286	5.18929e-08	1.88544e-06	[DDX60, LRRFIP1, OAS1, OAS2, OAS3, OASL]
GO:0003729	mRNA binding	9	2.49308	1.77021e-07	5.51293e-06	[APOBEC1, DDX6, EIF6, IGF2BP1, IGF2BP2, IGF2BP3, MRPL13, PIWIL1, PTBP3]
GO:0032069	regulation of nuclease activity	4	12.9032	9.205e-07	2.50836e-05	[OAS1, OAS2, OAS3, OASL]
GO:0004519	endonuclease activity	6	3.63636	2.81895e-06	6.14531e-05	[ANG, ERN2, EXO1, PIWIL1, RNASE7, RNASEH2A]
GO:0004521	endoribonuclease activity	5	5.55556	2.56481e-06	6.21254e-05	[ANG, ERN2, EXO1, PIWIL1, RNASEH2A]
GO:0042500	aspartic endopeptidase activity, intramembrane cleaving	3	17.6471	8.97042e-06	0.000177777	[IGF2BP1, IGF2BP2, IGF2BP3]
GO:0004386	helicase activity	6	2.8169	1.22128e-05	0.000221866	[DDX53, DDX6, DDX60, DDX60L, DQX1, RUVBL1]
GO:0004190	aspartic-type endopeptidase activity	4	4.87805	4.6747e-05	0.000783911	[GAPDH, IGF2BP1, IGF2BP2, IGF2BP3]
GO:0070001	aspartic-type peptidase activity	4	4.7619	5.13873e-05	0.000800174	[GAPDH, IGF2BP1, IGF2BP2, IGF2BP3]
GO:0003724	RNA helicase activity	4	4.54545	6.16657e-05	0.000896208	[DDX53, DDX6, DDX60, DDX60L]
GO:0048027	mRNA 5'-UTR binding	3	7.69231	0.000116128	0.00158225	[IGF2BP1, IGF2BP2, IGF2BP3]
GO:0003730	mRNA 3'-UTR binding	4	3.4188	0.000186246	0.00225564	[APOBEC1, IGF2BP1, IGF2BP2, IGF2BP3]
GO:0070566	adenylyltransferase activity	3	6.66667	0.000178481	0.00228875	[OAS1, OAS2, OAS3]
GO:0042623	ATPase activity, coupled	6	1.63934	0.000245512	0.00281692	[DDX53, DDX6, DDX60, DDX60L, DQX1, RUVBL1]
GO:0016779	nucleotidyltransferase activity	5	2.00803	0.000335767	0.00365986	[CD3EAP, OAS1, OAS2, OAS3, PARP4]
GO:0045296	cadherin binding	6	1.38889	0.0005928	0.00615383	[BZW1, CD3EAP, DDX6, LRRFIP1, PRDX1, RUVBL1]
GO:0004523	RNA-DNA hybrid ribonuclease activity	2	9.09091	0.00130029	0.0128847	[EXO1, RNASEH2A]
GO:0004131	cytosine deaminase activity	1	100	0.0024374	0.0231023	[APOBEC1]
GO:0051908	double-stranded DNA 5'-3' exodeoxyribonuclease activity	1	100	0.0024374	0.0231023	[EXO1]
GO:1903632	positive regulation of aminoacyl-tRNA ligase activity	1	100	0.0024374	0.0231023	[AIMP2]
GO:0030515	snoRNA binding	2	5.71429	0.00328259	0.0286242	[IGF2BP3, NOP10]
GO:0005524	ATP binding	11	0.613155	0.0031563	0.0286698	[DDX53, DDX6, DDX60, DDX60L, DQX1, ERN2, OAS1, OAS2, OAS3, OASL, RUVBL1]
GO:0016887	ATPase activity	6	0.967742	0.00372418	0.0312259	[DDX53, DDX6, DDX60, DDX60L, DQX1, RUVBL1]
GO:0003692	left-handed Z-DNA binding	1	50	0.004869	0.0366014	[IGF2BP1]
GO:0035605	peptidyl-cysteine S-nitrosylase activity	1	50	0.004869	0.0366014	[GAPDH]
GO:1903630	regulation of aminoacyl-tRNA ligase activity	1	50	0.004869	0.0366014	[AIMP2]
GO:0032559	adenyl ribonucleotide binding	11	0.585106	0.00453471	0.0366136	[DDX53, DDX6, DDX60, DDX60L, DQX1, ERN2, OAS1, OAS2, OAS3, OASL, RUVBL1]
GO:0030554	adenyl nucleotide binding	11	0.580169	0.00483805	0.0376677	[DDX53, DDX6, DDX60, DDX60L, DQX1, ERN2, OAS1, OAS2, OAS3, OASL, RUVBL1]
GO:0016891	endoribonuclease activity, producing 5'-phosphomonoesters	2	4.16667	0.00609954	0.0443233	[EXO1, RNASEH2A]
Gene Ontology Biological Process
GOID	GOTerm	Nr. Genes	% Associated Genes	Term PValue	Term PValue Corrected with Benjamini-Hochberg	Associated Genes Found
GO:0004540	ribonuclease activity	11	6.74847	2.9182e-14	2.97073e-11	[ANG, ERN2, EXO1, OAS1, OAS2, OAS3, OASL, PIWIL1, RNASE10, RNASE7, RNASEH2A]
GO:0090501	RNA phosphodiester bond hydrolysis	11	5.31401	4.09159e-13	2.08262e-10	[ANG, ERN2, EXO1, OAS1, OAS2, OAS3, OASL, PIWIL1, RNASE10, RNASE7, RNASEH2A]
GO:0004518	nuclease activity	11	3.78007	1.66427e-11	5.64743e-09	[ANG, ERN2, EXO1, OAS1, OAS2, OAS3, OASL, PIWIL1, RNASE10, RNASE7, RNASEH2A]
GO:0016070	RNA metabolic process	31	0.569643	2.25409e-10	5.73665e-08	[AIMP2, ANG, APOBEC1, BRCA1, CD3EAP, DDX6, EIF6, ERN2, EXO1, IGF2BP1, IGF2BP2, IGF2BP3, LRRFIP1, MRPL13, NOP10, OAS1, OAS2, OAS3, OASL, PARP4, PIWIL1, PTBP3, RBMS1, RBMS2, RNASE10, RNASE7, RNASEH2A, RUVBL1, SMAD6, SNRPD1, ZNFX1]
GO:0090305	nucleic acid phosphodiester bond hydrolysis	11	2.69608	6.12071e-10	1.24618e-07	[ANG, ERN2, EXO1, OAS1, OAS2, OAS3, OASL, PIWIL1, RNASE10, RNASE7, RNASEH2A]
GO:0060337	type I interferon signaling pathway	7	6.42202	3.02914e-09	4.40524e-07	[IFIT2, IFIT3, IGF2BP1, OAS1, OAS2, OAS3, OASL]
GO:0071357	cellular response to type I interferon	7	6.42202	3.02914e-09	4.40524e-07	[IFIT2, IFIT3, IGF2BP1, OAS1, OAS2, OAS3, OASL]
GO:0090304	nucleic acid metabolic process	31	0.519698	2.83747e-09	4.81425e-07	[AIMP2, ANG, APOBEC1, BRCA1, CD3EAP, DDX6, EIF6, ERN2, EXO1, IGF2BP1, IGF2BP2, IGF2BP3, LRRFIP1, MRPL13, NOP10, OAS1, OAS2, OAS3, OASL, PARP4, PIWIL1, PTBP3, RBMS1, RBMS2, RNASE10, RNASE7, RNASEH2A, RUVBL1, SMAD6, SNRPD1, ZNFX1]
GO:0034340	response to type I interferon	7	6.14035	4.15076e-09	5.28184e-07	[IFIT2, IFIT3, IGF2BP1, OAS1, OAS2, OAS3, OASL]
GO:0006139	nucleobase-containing compound metabolic process	32	0.488102	5.03602e-09	5.6963e-07	[AIMP2, ANG, APOBEC1, BRCA1, CD3EAP, DDX6, EIF6, ERN2, EXO1, GAPDH, IGF2BP1, IGF2BP2, IGF2BP3, LRRFIP1, MRPL13, NOP10, OAS1, OAS2, OAS3, OASL, PARP4, PIWIL1, PTBP3, RBMS1, RBMS2, RNASE10, RNASE7, RNASEH2A, RUVBL1, SMAD6, SNRPD1, ZNFX1]
GO:0051607	defense response to virus	9	3.07167	9.07358e-09	8.39718e-07	[APOBEC1, DDX60, IFIT2, IFIT3, MRPL13, OAS1, OAS2, OAS3, OASL]
GO:0060700	regulation of ribonuclease activity	4	33.3333	8.87135e-09	9.03104e-07	[OAS1, OAS2, OAS3, OASL]
GO:0010629	negative regulation of gene expression	19	0.790678	9.26984e-08	7.86391e-06	[ANG, APOBEC1, BRCA1, CD3EAP, DDX6, EIF6, ERN2, GAPDH, IGF2BP1, IGF2BP2, IGF2BP3, LRRFIP1, MRPL13, PIWIL1, PTBP3, RNASE7, RNASEH2A, SMAD6, ZNFX1]
GO:0017148	negative regulation of translation	7	3.8674	1.02106e-07	7.99565e-06	[ANG, EIF6, GAPDH, IGF2BP1, IGF2BP2, IGF2BP3, MRPL13]
GO:0009615	response to virus	9	2.24439	1.34357e-07	9.76967e-06	[APOBEC1, DDX60, IFIT2, IFIT3, MRPL13, OAS1, OAS2, OAS3, OASL]
GO:0034249	negative regulation of cellular amide metabolic process	7	3.27103	3.19097e-07	2.16561e-05	[ANG, EIF6, GAPDH, IGF2BP1, IGF2BP2, IGF2BP3, MRPL13]
GO:0032069	regulation of nuclease activity	4	12.9032	5.47625e-07	3.48426e-05	[OAS1, OAS2, OAS3, OASL]
GO:0006412	translation	11	1.36986	6.33772e-07	3.79518e-05	[AIMP2, ANG, EIF6, GAPDH, IGF2BP1, IGF2BP2, IGF2BP3, MRPL13, MRPL14, PIWIL1, PTBP3]
GO:0010608	posttranscriptional regulation of gene expression	11	1.35468	7.07619e-07	4.00198e-05	[ANG, APOBEC1, EIF6, GAPDH, IGF2BP1, IGF2BP2, IGF2BP3, MRPL13, PIWIL1, PTBP3, RNASE7]
GO:0006417	regulation of translation	9	1.77165	9.79103e-07	4.98363e-05	[ANG, EIF6, GAPDH, IGF2BP1, IGF2BP2, IGF2BP3, MRPL13, PIWIL1, PTBP3]
GO:0043043	peptide biosynthetic process	11	1.31737	9.32066e-07	4.99391e-05	[AIMP2, ANG, EIF6, GAPDH, IGF2BP1, IGF2BP2, IGF2BP3, MRPL13, MRPL14, PIWIL1, PTBP3]
GO:0006401	RNA catabolic process	9	1.75097	1.0793e-06	5.23202e-05	[APOBEC1, DDX6, ERN2, IGF2BP1, IGF2BP2, IGF2BP3, MRPL13, OAS2, RNASEH2A]
GO:0004521	endoribonuclease activity	5	5.55556	1.34593e-06	5.70898e-05	[ANG, ERN2, EXO1, PIWIL1, RNASEH2A]
GO:0004519	endonuclease activity	6	3.63636	1.30615e-06	5.78112e-05	[ANG, ERN2, EXO1, PIWIL1, RNASE7, RNASEH2A]
GO:0010605	negative regulation of macromolecule metabolic process	21	0.606236	1.27654e-06	5.90691e-05	[ANG, APOBEC1, BRCA1, CD3EAP, DDX6, EIF6, ERN2, GAPDH, IGF2BP1, IGF2BP2, IGF2BP3, LRRFIP1, MRPL13, MVP, PARP4, PIWIL1, PTBP3, RNASE7, RNASEH2A, SMAD6, ZNFX1]
GO:0050657	nucleic acid transport	7	2.46479	2.12699e-06	8.66109e-05	[EIF6, IGF2BP1, IGF2BP2, IGF2BP3, MVP, PARP4, RNASE7]
GO:0050658	RNA transport	7	2.46479	2.12699e-06	8.66109e-05	[EIF6, IGF2BP1, IGF2BP2, IGF2BP3, MVP, PARP4, RNASE7]
GO:0051236	establishment of RNA localization	7	2.38908	2.61541e-06	0.000102403	[EIF6, IGF2BP1, IGF2BP2, IGF2BP3, MVP, PARP4, RNASE7]
GO:0090502	RNA phosphodiester bond hydrolysis, endonucleolytic	5	4.6729	3.17035e-06	0.000119534	[ANG, ERN2, EXO1, PIWIL1, RNASEH2A]
GO:0034248	regulation of cellular amide metabolic process	9	1.51771	3.4998e-06	0.000127243	[ANG, EIF6, GAPDH, IGF2BP1, IGF2BP2, IGF2BP3, MRPL13, PIWIL1, PTBP3]
GO:0071345	cellular response to cytokine stimulus	13	0.915493	4.55533e-06	0.000159908	[BRCA1, GAPDH, IFIT2, IFIT3, IGF2BP1, IGF2BP3, LRRFIP1, OAS1, OAS2, OAS3, OASL, RNASEH2A, SMAD6]
GO:0009892	negative regulation of metabolic process	21	0.557029	5.33001e-06	0.000180865	[ANG, APOBEC1, BRCA1, CD3EAP, DDX6, EIF6, ERN2, GAPDH, IGF2BP1, IGF2BP2, IGF2BP3, LRRFIP1, MRPL13, MVP, PARP4, PIWIL1, PTBP3, RNASE7, RNASEH2A, SMAD6, ZNFX1]
GO:0042500	aspartic endopeptidase activity, intramembrane cleaving	3	17.6471	6.09571e-06	0.00019392	[IGF2BP1, IGF2BP2, IGF2BP3]
GO:0051707	response to other organism	15	0.766088	5.91743e-06	0.000194321	[APOBEC1, DDX60, GAPDH, IFIT2, IFIT3, IGF2BP1, MRPL13, OAS1, OAS2, OAS3, OASL, PRDX1, RNASE7, RNASEH2A, SMAD6]
GO:0043604	amide biosynthetic process	11	1.07004	7.0009e-06	0.000215967	[AIMP2, ANG, EIF6, GAPDH, IGF2BP1, IGF2BP2, IGF2BP3, MRPL13, MRPL14, PIWIL1, PTBP3]
GO:0051028	mRNA transport	6	2.66667	7.8376e-06	0.00022163	[IGF2BP1, IGF2BP2, IGF2BP3, MVP, PARP4, RNASE7]
GO:0015931	nucleobase-containing compound transport	7	2.02312	7.79923e-06	0.000226846	[EIF6, IGF2BP1, IGF2BP2, IGF2BP3, MVP, PARP4, RNASE7]
GO:0006518	peptide metabolic process	11	1.06075	7.60742e-06	0.000227775	[AIMP2, ANG, EIF6, GAPDH, IGF2BP1, IGF2BP2, IGF2BP3, MRPL13, MRPL14, PIWIL1, PTBP3]
GO:0010467	gene expression	27	0.431034	1.0065e-05	0.000256155	[AIMP2, ANG, APOBEC1, BRCA1, CD3EAP, DDX6, EIF6, ERN2, GAPDH, IGF2BP1, IGF2BP2, IGF2BP3, LRRFIP1, MRPL13, MRPL14, NOP10, PARP4, PIWIL1, PTBP3, RBMS1, RBMS2, RNASE7, RNASEH2A, RUVBL1, SMAD6, SNRPD1, ZNFX1]
GO:0098542	defense response to other organism	13	0.85752	9.3362e-06	0.000256872	[APOBEC1, DDX60, GAPDH, IFIT2, IFIT3, IGF2BP1, MRPL13, OAS1, OAS2, OAS3, OASL, PRDX1, RNASE7]
GO:0034097	response to cytokine	13	0.852459	9.95766e-06	0.00025992	[BRCA1, GAPDH, IFIT2, IFIT3, IGF2BP1, IGF2BP3, LRRFIP1, OAS1, OAS2, OAS3, OASL, RNASEH2A, SMAD6]
GO:0045087	innate immune response	12	0.933126	9.7911e-06	0.000262298	[DDX60, GAPDH, IFIT2, IFIT3, IGF2BP1, MRPL13, OAS1, OAS2, OAS3, OASL, PRDX1, RNASE7]
GO:0034655	nucleobase-containing compound catabolic process	9	1.31195	1.13676e-05	0.000282249	[APOBEC1, DDX6, ERN2, IGF2BP1, IGF2BP2, IGF2BP3, MRPL13, OAS2, RNASEH2A]
GO:0051171	regulation of nitrogen compound metabolic process	28	0.410798	1.43803e-05	0.000348551	[AIMP2, ANG, APOBEC1, BRCA1, CD3EAP, DDX6, EIF6, ERN2, GAPDH, IGF2BP1, IGF2BP2, IGF2BP3, LRRFIP1, MRPL13, MVP, OAS1, OAS2, OAS3, OASL, PARP4, PIWIL1, PRDX1, PTBP3, RNASE7, RNASEH2A, RUVBL1, SMAD6, ZNFX1]
GO:0051172	negative regulation of nitrogen compound metabolic process	18	0.598205	1.52371e-05	0.000352531	[ANG, APOBEC1, BRCA1, CD3EAP, EIF6, ERN2, GAPDH, IGF2BP1, IGF2BP2, IGF2BP3, LRRFIP1, MRPL13, MVP, PARP4, PTBP3, RNASEH2A, SMAD6, ZNFX1]
GO:2000113	negative regulation of cellular macromolecule biosynthetic process	14	0.759631	1.51922e-05	0.000359666	[ANG, APOBEC1, BRCA1, EIF6, ERN2, GAPDH, IGF2BP1, IGF2BP2, IGF2BP3, LRRFIP1, MRPL13, RNASEH2A, SMAD6, ZNFX1]
GO:0045071	negative regulation of viral genome replication	4	5.47945	1.77556e-05	0.00040167	[OAS1, OAS2, OAS3, OASL]
GO:0001817	regulation of cytokine production	10	1.04167	2.53706e-05	0.000538068	[BRCA1, DDX60, GAPDH, IGF2BP1, IGF2BP2, IGF2BP3, LRRFIP1, MRPL13, RNASEH2A, SMAD6]
GO:0044270	cellular nitrogen compound catabolic process	9	1.1889	2.48752e-05	0.000538787	[APOBEC1, DDX6, ERN2, IGF2BP1, IGF2BP2, IGF2BP3, MRPL13, OAS2, RNASEH2A]
GO:0046700	heterocycle catabolic process	9	1.19048	2.4617e-05	0.000544785	[APOBEC1, DDX6, ERN2, IGF2BP1, IGF2BP2, IGF2BP3, MRPL13, OAS2, RNASEH2A]
GO:0010558	negative regulation of macromolecule biosynthetic process	14	0.718317	2.87204e-05	0.000573281	[ANG, APOBEC1, BRCA1, EIF6, ERN2, GAPDH, IGF2BP1, IGF2BP2, IGF2BP3, LRRFIP1, MRPL13, RNASEH2A, SMAD6, ZNFX1]
GO:0080090	regulation of primary metabolic process	28	0.398236	2.82375e-05	0.000574915	[AIMP2, ANG, APOBEC1, BRCA1, CD3EAP, DDX6, EIF6, ERN2, GAPDH, IGF2BP1, IGF2BP2, IGF2BP3, LRRFIP1, MRPL13, MVP, OAS1, OAS2, OAS3, OASL, PARP4, PIWIL1, PRDX1, PTBP3, RNASE7, RNASEH2A, RUVBL1, SMAD6, ZNFX1]
GO:0004190	aspartic-type endopeptidase activity	4	4.87805	2.81395e-05	0.000584612	[GAPDH, IGF2BP1, IGF2BP2, IGF2BP3]
GO:0019439	aromatic compound catabolic process	9	1.15533	3.11705e-05	0.000598708	[APOBEC1, DDX6, ERN2, IGF2BP1, IGF2BP2, IGF2BP3, MRPL13, OAS2, RNASEH2A]
GO:0070001	aspartic-type peptidase activity	4	4.7619	3.0947e-05	0.000605846	[GAPDH, IGF2BP1, IGF2BP2, IGF2BP3]
GO:0019221	cytokine-mediated signaling pathway	10	1	3.59971e-05	0.000678613	[IFIT2, IFIT3, IGF2BP1, IGF2BP3, LRRFIP1, OAS1, OAS2, OAS3, OASL, RNASEH2A]
GO:0060255	regulation of macromolecule metabolic process	28	0.392597	3.83708e-05	0.000710209	[AIMP2, ANG, APOBEC1, BRCA1, CD3EAP, DDX6, EIF6, ERN2, GAPDH, IGF2BP1, IGF2BP2, IGF2BP3, LRRFIP1, MRPL13, MVP, OAS1, OAS2, OAS3, OASL, PARP4, PIWIL1, PRDX1, PTBP3, RNASE7, RNASEH2A, RUVBL1, SMAD6, ZNFX1]
GO:0031327	negative regulation of cellular biosynthetic process	14	0.6917	4.39155e-05	0.000798321	[ANG, APOBEC1, BRCA1, EIF6, ERN2, GAPDH, IGF2BP1, IGF2BP2, IGF2BP3, LRRFIP1, MRPL13, RNASEH2A, SMAD6, ZNFX1]
GO:0031324	negative regulation of cellular metabolic process	18	0.552656	4.62122e-05	0.000825333	[ANG, APOBEC1, BRCA1, CD3EAP, EIF6, ERN2, GAPDH, IGF2BP1, IGF2BP2, IGF2BP3, LRRFIP1, MRPL13, MVP, PARP4, PTBP3, RNASEH2A, SMAD6, ZNFX1]
GO:1901361	organic cyclic compound catabolic process	9	1.09356	4.79054e-05	0.000840822	[APOBEC1, DDX6, ERN2, IGF2BP1, IGF2BP2, IGF2BP3, MRPL13, OAS2, RNASEH2A]
GO:0031323	regulation of cellular metabolic process	28	0.387436	5.09009e-05	0.000878256	[AIMP2, ANG, APOBEC1, BRCA1, CD3EAP, DDX6, EIF6, ERN2, GAPDH, IGF2BP1, IGF2BP2, IGF2BP3, LRRFIP1, MRPL13, MVP, OAS1, OAS2, OAS3, OASL, PARP4, PIWIL1, PRDX1, PTBP3, RNASE7, RNASEH2A, RUVBL1, SMAD6, ZNFX1]
GO:0009890	negative regulation of biosynthetic process	14	0.678623	5.4337e-05	0.000921918	[ANG, APOBEC1, BRCA1, EIF6, ERN2, GAPDH, IGF2BP1, IGF2BP2, IGF2BP3, LRRFIP1, MRPL13, RNASEH2A, SMAD6, ZNFX1]
GO:1903901	negative regulation of viral life cycle	4	4	6.13607e-05	0.00102402	[OAS1, OAS2, OAS3, OASL]
GO:0016071	mRNA metabolic process	10	0.918274	7.40958e-05	0.00121661	[ANG, APOBEC1, DDX6, ERN2, IGF2BP1, IGF2BP2, IGF2BP3, MRPL13, PTBP3, SNRPD1]
GO:0060333	interferon-gamma-mediated signaling pathway	4	3.57143	9.54096e-05	0.0015417	[OAS1, OAS2, OAS3, OASL]
GO:0032269	negative regulation of cellular protein metabolic process	11	0.804682	9.86391e-05	0.00156898	[ANG, BRCA1, CD3EAP, EIF6, GAPDH, IGF2BP1, IGF2BP2, IGF2BP3, MRPL13, MVP, SMAD6]
GO:0034645	cellular macromolecule biosynthetic process	24	0.419727	0.000104183	0.00163167	[AIMP2, ANG, APOBEC1, BRCA1, CD3EAP, EIF6, ERN2, EXO1, GAPDH, IGF2BP1, IGF2BP2, IGF2BP3, LRRFIP1, MRPL13, MRPL14, NOP10, PARP4, PIWIL1, PTBP3, RBMS1, RNASEH2A, RUVBL1, SMAD6, ZNFX1]
GO:0048523	negative regulation of cellular process	24	0.418556	0.000109449	0.00168817	[AIMP2, ANG, APOBEC1, BRCA1, CD3EAP, DDX6, EIF6, ERN2, GAPDH, IFIT3, IGF2BP1, IGF2BP2, IGF2BP3, LRRFIP1, MRPL13, MVP, PARP4, PIWIL1, PRDX1, PTBP3, RNASEH2A, RUVBL1, SMAD6, ZNFX1]
GO:0043603	cellular amide metabolic process	11	0.793651	0.000111662	0.0016966	[AIMP2, ANG, EIF6, GAPDH, IGF2BP1, IGF2BP2, IGF2BP3, MRPL13, MRPL14, PIWIL1, PTBP3]
GO:0071346	cellular response to interferon-gamma	5	2.17391	0.000126346	0.00189148	[GAPDH, OAS1, OAS2, OAS3, OASL]
GO:0045069	regulation of viral genome replication	4	3.30579	0.000128709	0.00189893	[OAS1, OAS2, OAS3, OASL]
GO:0048525	negative regulation of viral process	4	3.125	0.000159893	0.0023253	[OAS1, OAS2, OAS3, OASL]
GO:0051248	negative regulation of protein metabolic process	11	0.759668	0.000164976	0.00236543	[ANG, BRCA1, CD3EAP, EIF6, GAPDH, IGF2BP1, IGF2BP2, IGF2BP3, MRPL13, MVP, SMAD6]
GO:0009059	macromolecule biosynthetic process	24	0.407955	0.000171537	0.00242534	[AIMP2, ANG, APOBEC1, BRCA1, CD3EAP, EIF6, ERN2, EXO1, GAPDH, IGF2BP1, IGF2BP2, IGF2BP3, LRRFIP1, MRPL13, MRPL14, NOP10, PARP4, PIWIL1, PTBP3, RBMS1, RNASEH2A, RUVBL1, SMAD6, ZNFX1]
GO:0034341	response to interferon-gamma	5	1.97628	0.000197091	0.00274847	[GAPDH, OAS1, OAS2, OAS3, OASL]
GO:0040029	regulation of gene expression, epigenetic	6	1.45985	0.000224359	0.00308645	[APOBEC1, BRCA1, CD3EAP, EIF6, RNASE7, ZNFX1]
GO:0032268	regulation of cellular protein metabolic process	17	0.511894	0.000229062	0.00310913	[AIMP2, ANG, BRCA1, CD3EAP, DDX6, EIF6, ERN2, GAPDH, IGF2BP1, IGF2BP2, IGF2BP3, MRPL13, MVP, PIWIL1, PRDX1, PTBP3, SMAD6]
GO:0019058	viral life cycle	6	1.43198	0.000248907	0.00333404	[DDX6, OAS1, OAS2, OAS3, OASL, RNASE7]
GO:0035457	cellular response to interferon-alpha	2	16.6667	0.000292511	0.00386722	[IFIT2, IFIT3]
GO:0001819	positive regulation of cytokine production	7	1.12903	0.000310047	0.00399529	[BRCA1, DDX60, GAPDH, IGF2BP1, LRRFIP1, MRPL13, RNASEH2A]
GO:0051276	chromosome organization	11	0.707395	0.0003086	0.00402762	[APOBEC1, BRCA1, DQX1, ERN2, EXO1, NOP10, PARP4, PIWIL1, RNASE7, RUVBL1, ZNFX1]
GO:0019079	viral genome replication	4	2.5641	0.000340794	0.0043366	[OAS1, OAS2, OAS3, OASL]
GO:0043903	regulation of symbiosis, encompassing mutualism through parasitism	5	1.73611	0.000358427	0.00450468	[GAPDH, OAS1, OAS2, OAS3, OASL]
GO:0007166	cell surface receptor signaling pathway	18	0.466926	0.000439283	0.00545354	[BRCA1, CD3EAP, IFIT2, IFIT3, IGF2BP1, IGF2BP2, IGF2BP3, LRRFIP1, MVP, OAS1, OAS2, OAS3, OASL, PARP4, PRDX1, RNASEH2A, RUVBL1, SMAD6]
GO:0006402	mRNA catabolic process	6	1.28205	0.000449272	0.00551035	[APOBEC1, DDX6, IGF2BP1, IGF2BP2, IGF2BP3, MRPL13]
GO:0051246	regulation of protein metabolic process	17	0.482543	0.000475687	0.00576487	[AIMP2, ANG, BRCA1, CD3EAP, DDX6, EIF6, ERN2, GAPDH, IGF2BP1, IGF2BP2, IGF2BP3, MRPL13, MVP, PIWIL1, PRDX1, PTBP3, SMAD6]
GO:0006465	signal peptide processing	2	12.5	0.000528958	0.00633505	[IGF2BP1, IGF2BP2]
GO:0006396	RNA processing	9	0.78125	0.000603565	0.00714452	[APOBEC1, EIF6, ERN2, IGF2BP3, NOP10, PTBP3, RBMS1, RBMS2, SNRPD1]
GO:0045182	translation regulator activity	4	2.18579	0.000622681	0.00728608	[EIF6, IGF2BP1, IGF2BP2, IGF2BP3]
GO:1903900	regulation of viral life cycle	4	2.16216	0.000648588	0.00750298	[OAS1, OAS2, OAS3, OASL]
GO:1904874	positive regulation of telomerase RNA localization to Cajal body	2	11.1111	0.000672594	0.00769327	[NOP10, RUVBL1]
GO:0044265	cellular macromolecule catabolic process	10	0.685401	0.000794518	0.00898688	[APOBEC1, DDX6, ERN2, IGF2BP1, IGF2BP2, IGF2BP3, MRPL13, OAS2, RNASEH2A, SMAD6]
GO:0016458	gene silencing	5	1.44509	0.000824226	0.00922046	[APOBEC1, EIF6, PIWIL1, RNASE7, ZNFX1]
GO:0044267	cellular protein metabolic process	23	0.379914	0.000883991	0.00978155	[AIMP2, ANG, APOBEC1, BRCA1, CD3EAP, DDX6, EIF6, ERN2, GAPDH, IGF2BP1, IGF2BP2, IGF2BP3, LRRFIP1, MRPL13, MRPL14, MVP, PARP4, PIWIL1, PRDX1, PTBP3, RNASE7, RUVBL1, SMAD6]
GO:0004523	RNA-DNA hybrid ribonuclease activity	2	9.09091	0.00100999	0.0108229	[EXO1, RNASEH2A]
GO:0035455	response to interferon-alpha	2	9.09091	0.00100999	0.0108229	[IFIT2, IFIT3]
GO:0071310	cellular response to organic substance	16	0.471559	0.00100431	0.0108764	[APOBEC1, BRCA1, ERN2, GAPDH, IFIT2, IFIT3, IGF2BP1, IGF2BP3, LRRFIP1, OAS1, OAS2, OAS3, OASL, RNASE7, RNASEH2A, SMAD6]
GO:0031047	gene silencing by RNA	4	1.92308	0.00100406	0.0109907	[EIF6, PIWIL1, RNASE7, ZNFX1]
GO:0010468	regulation of gene expression	21	0.396451	0.00105968	0.011237	[ANG, APOBEC1, BRCA1, CD3EAP, DDX6, EIF6, ERN2, GAPDH, IGF2BP1, IGF2BP2, IGF2BP3, LRRFIP1, MRPL13, PARP4, PIWIL1, PTBP3, RNASE7, RNASEH2A, RUVBL1, SMAD6, ZNFX1]
GO:0032481	positive regulation of type I interferon production	3	3.15789	0.00110522	0.0113647	[IGF2BP1, LRRFIP1, MRPL13]
GO:0034660	ncRNA metabolic process	6	1.08303	0.00108564	0.0113937	[AIMP2, EIF6, ERN2, IGF2BP3, NOP10, PIWIL1]
GO:1904872	regulation of telomerase RNA localization to Cajal body	2	8.69565	0.00110468	0.0114752	[NOP10, RUVBL1]
GO:0044271	cellular nitrogen compound biosynthetic process	22	0.383676	0.00114107	0.0115011	[AIMP2, ANG, APOBEC1, BRCA1, CD3EAP, EIF6, ERN2, GAPDH, IGF2BP1, IGF2BP2, IGF2BP3, LRRFIP1, MRPL13, MRPL14, NOP10, PARP4, PIWIL1, PTBP3, RNASEH2A, RUVBL1, SMAD6, ZNFX1]
GO:0033619	membrane protein proteolysis	3	3.125	0.00113918	0.0115969	[IGF2BP1, IGF2BP2, IGF2BP3]
GO:0090670	RNA localization to Cajal body	2	8.33333	0.00120348	0.0120112	[NOP10, RUVBL1]
GO:0090671	telomerase RNA localization to Cajal body	2	8.33333	0.00120348	0.0120112	[NOP10, RUVBL1]
GO:0090672	telomerase RNA localization	2	8.33333	0.00120348	0.0120112	[NOP10, RUVBL1]
GO:0090685	RNA localization to nucleus	2	8.33333	0.00120348	0.0120112	[NOP10, RUVBL1]
GO:1903312	negative regulation of mRNA metabolic process	3	2.85714	0.00147485	0.0145766	[APOBEC1, IGF2BP1, PTBP3]
GO:0043488	regulation of mRNA stability	4	1.7094	0.00155038	0.0151758	[APOBEC1, IGF2BP1, IGF2BP2, IGF2BP3]
GO:1901566	organonitrogen compound biosynthetic process	12	0.545703	0.00162163	0.0157221	[AIMP2, ANG, APOBEC1, EIF6, GAPDH, IGF2BP1, IGF2BP2, IGF2BP3, MRPL13, MRPL14, PIWIL1, PTBP3]
GO:0039529	RIG-I signaling pathway	2	7.14286	0.00163933	0.0157438	[DDX60, MRPL13]
GO:0043487	regulation of RNA stability	4	1.63934	0.00180687	0.0171906	[APOBEC1, IGF2BP1, IGF2BP2, IGF2BP3]
GO:0044728	DNA methylation or demethylation	3	2.5	0.00216105	0.0199996	[APOBEC1, BRCA1, PIWIL1]
GO:0044260	cellular macromolecule metabolic process	29	0.315286	0.00215208	0.0200992	[AIMP2, ANG, APOBEC1, BRCA1, CD3EAP, DDX6, EIF6, ERN2, EXO1, GAPDH, IGF2BP1, IGF2BP2, IGF2BP3, LRRFIP1, MRPL13, MRPL14, MVP, NOP10, OAS2, PARP4, PIWIL1, PRDX1, PTBP3, RBMS1, RNASE7, RNASEH2A, RUVBL1, SMAD6, ZNFX1]
GO:0051908	double-stranded DNA 5'-3' exodeoxyribonuclease activity	1	100	0.00214722	0.0202396	[EXO1]
GO:0070510	regulation of histone H4-K20 methylation	1	100	0.00214722	0.0202396	[BRCA1]
GO:0070512	positive regulation of histone H4-K20 methylation	1	100	0.00214722	0.0202396	[BRCA1]
GO:0090365	regulation of mRNA modification	1	100	0.00214722	0.0202396	[APOBEC1]
GO:0090366	positive regulation of mRNA modification	1	100	0.00214722	0.0202396	[APOBEC1]
GO:1903632	positive regulation of aminoacyl-tRNA ligase activity	1	100	0.00214722	0.0202396	[AIMP2]
GO:1903311	regulation of mRNA metabolic process	5	1.14155	0.00233529	0.0214174	[APOBEC1, IGF2BP1, IGF2BP2, IGF2BP3, PTBP3]
GO:0039528	cytoplasmic pattern recognition receptor signaling pathway in response to virus	2	5.88235	0.00241329	0.0219351	[DDX60, MRPL13]
GO:0050792	regulation of viral process	4	1.50943	0.002439	0.0219726	[OAS1, OAS2, OAS3, OASL]
GO:0019219	regulation of nucleobase-containing compound metabolic process	19	0.393131	0.00255155	0.0225867	[APOBEC1, BRCA1, EIF6, ERN2, IGF2BP1, IGF2BP2, IGF2BP3, LRRFIP1, OAS1, OAS2, OAS3, OASL, PARP4, PTBP3, RNASE7, RNASEH2A, RUVBL1, SMAD6, ZNFX1]
GO:0061013	regulation of mRNA catabolic process	4	1.49254	0.00254027	0.0226842	[APOBEC1, IGF2BP1, IGF2BP2, IGF2BP3]
GO:0016072	rRNA metabolic process	4	1.48148	0.00260938	0.0228995	[EIF6, ERN2, IGF2BP3, NOP10]
GO:0043901	negative regulation of multi-organism process	4	1.48148	0.00260938	0.0228995	[OAS1, OAS2, OAS3, OASL]
GO:0098781	ncRNA transcription	3	2.29008	0.00277206	0.0241193	[ANG, BRCA1, CD3EAP]
GO:0006259	DNA metabolic process	8	0.681431	0.00302947	0.025916	[APOBEC1, BRCA1, EXO1, NOP10, PARP4, PIWIL1, RNASEH2A, RUVBL1]
GO:0016032	viral process	8	0.682012	0.00301354	0.0259982	[DDX6, EIF6, MRPL13, OAS1, OAS2, OAS3, OASL, RNASE7]
GO:0009057	macromolecule catabolic process	10	0.570125	0.00319889	0.0271372	[APOBEC1, DDX6, ERN2, IGF2BP1, IGF2BP2, IGF2BP3, MRPL13, OAS2, RNASEH2A, SMAD6]
GO:0042035	regulation of cytokine biosynthetic process	3	2.14286	0.00334387	0.0281327	[IGF2BP1, IGF2BP2, IGF2BP3]
GO:0006304	DNA modification	3	2.08333	0.00361952	0.0302022	[APOBEC1, BRCA1, PIWIL1]
GO:0019538	protein metabolic process	23	0.344983	0.00381723	0.031593	[AIMP2, ANG, APOBEC1, BRCA1, CD3EAP, DDX6, EIF6, ERN2, GAPDH, IGF2BP1, IGF2BP2, IGF2BP3, LRRFIP1, MRPL13, MRPL14, MVP, PARP4, PIWIL1, PRDX1, PTBP3, RNASE7, RUVBL1, SMAD6]
GO:0042089	cytokine biosynthetic process	3	1.98676	0.0041346	0.0339437	[IGF2BP1, IGF2BP2, IGF2BP3]
GO:0042107	cytokine metabolic process	3	1.97368	0.00421163	0.0342995	[IGF2BP1, IGF2BP2, IGF2BP3]
GO:0022013	pallium cell proliferation in forebrain	1	50	0.00428995	0.0343872	[IGF2BP1]
GO:0035605	peptidyl-cysteine S-nitrosylase activity	1	50	0.00428995	0.0343872	[GAPDH]
GO:0044533	positive regulation of apoptotic process in other organism	1	50	0.00428995	0.0343872	[GAPDH]
GO:0052501	positive regulation by organism of apoptotic process in other organism involved in symbiotic interaction	1	50	0.00428995	0.0343872	[GAPDH]
GO:1902761	positive regulation of chondrocyte development	1	50	0.00428995	0.0343872	[SMAD6]
GO:1903041	regulation of chondrocyte hypertrophy	1	50	0.00428995	0.0343872	[SMAD6]
GO:1903043	positive regulation of chondrocyte hypertrophy	1	50	0.00428995	0.0343872	[SMAD6]
GO:1903630	regulation of aminoacyl-tRNA ligase activity	1	50	0.00428995	0.0343872	[AIMP2]
GO:0007165	signal transduction	24	0.335196	0.00425797	0.0344017	[BRCA1, CD3EAP, DDX6, DDX60, EIF6, ERN2, EXO1, IFIT2, IFIT3, IGF2BP1, IGF2BP2, IGF2BP3, LRRFIP1, MRPL13, MVP, OAS1, OAS2, OAS3, OASL, PARP4, PRDX1, RNASEH2A, RUVBL1, SMAD6]
GO:0009303	rRNA transcription	2	4.34783	0.00438064	0.0348398	[ANG, CD3EAP]
GO:0031398	positive regulation of protein ubiquitination	3	1.92308	0.00452849	0.0357365	[AIMP2, BRCA1, SMAD6]
GO:0006298	mismatch repair	2	4.25532	0.00456916	0.03578	[EXO1, RNASEH2A]
GO:0032479	regulation of type I interferon production	3	1.91083	0.00460991	0.0358235	[IGF2BP1, LRRFIP1, MRPL13]
GO:0016891	endoribonuclease activity, producing 5'-phosphomonoesters	2	4.16667	0.00476138	0.0367204	[EXO1, RNASEH2A]
GO:0009894	regulation of catabolic process	8	0.630915	0.00485006	0.036846	[APOBEC1, EIF6, GAPDH, IGF2BP1, IGF2BP2, IGF2BP3, RNASE7, SMAD6]
GO:2000112	regulation of cellular macromolecule biosynthetic process	18	0.383632	0.0048145	0.0368508	[ANG, APOBEC1, BRCA1, EIF6, ERN2, GAPDH, IGF2BP1, IGF2BP2, IGF2BP3, LRRFIP1, MRPL13, PARP4, PIWIL1, PTBP3, RNASEH2A, RUVBL1, SMAD6, ZNFX1]
GO:0006096	glycolytic process	3	1.84049	0.0051171	0.0385867	[EIF6, GAPDH, RNASE7]
GO:0006757	ATP generation from ADP	3	1.82927	0.00520477	0.0389592	[EIF6, GAPDH, RNASE7]
GO:0043412	macromolecule modification	19	0.36886	0.00554382	0.0411942	[AIMP2, ANG, APOBEC1, BRCA1, DDX6, EIF6, ERN2, GAPDH, IGF2BP2, LRRFIP1, MRPL13, MVP, NOP10, PARP4, PIWIL1, PRDX1, RNASE7, RUVBL1, SMAD6]
GO:0045934	negative regulation of nucleobase-containing compound metabolic process	10	0.524934	0.00579356	0.042738	[APOBEC1, BRCA1, ERN2, IGF2BP1, LRRFIP1, PARP4, PTBP3, RNASEH2A, SMAD6, ZNFX1]
GO:0046031	ADP metabolic process	3	1.72414	0.0061317	0.0449069	[EIF6, GAPDH, RNASE7]
GO:0050832	defense response to fungus	2	3.57143	0.00643062	0.0464282	[GAPDH, RNASE7]
GO:0004365	glyceraldehyde-3-phosphate dehydrogenase (NAD+) (phosphorylating) activity	1	33.3333	0.0064282	0.0467422	[GAPDH]
GO:0010859	calcium-dependent cysteine-type endopeptidase inhibitor activity	1	33.3333	0.0064282	0.0467422	[CD3EAP]
GO:0030702	chromatin silencing at centromere	1	33.3333	0.0064282	0.0467422	[ZNFX1]
GO:0031120	snRNA pseudouridine synthesis	1	33.3333	0.0064282	0.0467422	[NOP10]
GO:0043891	glyceraldehyde-3-phosphate dehydrogenase (NAD(P)+) (phosphorylating) activity	1	33.3333	0.0064282	0.0467422	[GAPDH]
GO:0090310	negative regulation of methylation-dependent chromatin silencing	1	33.3333	0.0064282	0.0467422	[APOBEC1]
GO:1904743	negative regulation of telomeric DNA binding	1	33.3333	0.0064282	0.0467422	[PARP4]
GO:2000620	positive regulation of histone H4-K16 acetylation	1	33.3333	0.0064282	0.0467422	[BRCA1]
GO:0043486	histone exchange	2	3.44828	0.00688388	0.0493506	[PIWIL1, RUVBL1]
