# Supplementary material for: RNA Binding Proteins as Drivers and Therapeutic Target Candidates in Pancreatic Ductal Adenocarcinoma
Source: Int J Mol Sci. 2020 Jun 11;21(11):4190. doi: 10.3390/ijms21114190 (PMC7312628; doi:10.3390/ijms21114190)
Supplement: Supplementary file 1 [file ijms-21-04190-s001.zip › S7.xlsx]

## Sheet: Tabelle1
gene_ID	gene_name	RNAi_classical	RNAi_basal	CRISPR_classical	CRISPR_basal
ENSG00000012048	BRCA1	-0.159206	-0.0492768	-0.701168	-0.592403
ENSG00000013364	MVP	NA	0.0308523	-0.0321264	-0.0353887
ENSG00000073792	IGF2BP2	-0.036175	-0.0418865	-0.284677	-0.313899
ENSG00000076067	RBMS2	-0.0621475	-0.0456419	0.317143	0.21792
ENSG00000082153	BZW1	NA	-0.0853492	-0.0699822	-0.0225353
ENSG00000089127	OAS1	0.0842288	-0.00482441	0.110892	0.0269834
ENSG00000102699	PARP4	-0.0605083	-0.0181844	0.0478825	0.0580754
ENSG00000104889	RNASEH2A	-0.174574	-0.0351608	-0.49477	-0.385607
ENSG00000106305	AIMP2	-0.172158	-0.203871	-0.349517	-0.285038
ENSG00000111331	OAS3	-0.0136718	-0.00370052	-0.025149	-0.141086
ENSG00000111335	OAS2	0.220946	0.0703953	-0.0600569	-0.125832
ENSG00000111640	GAPDH	-0.477898	-0.612419	-1.09549	-1.00641
ENSG00000111701	APOBEC1	-0.143112	-0.206089	-0.13036	-0.204551
ENSG00000117450	PRDX1	-0.0403022	-0.148881	0.0937559	0.120833
ENSG00000117877	CD3EAP	-0.104223	-0.118033	-0.468281	-0.44852
ENSG00000119314	PTBP3	NA	NA	-0.231991	-0.181452
ENSG00000119917	IFIT3	0.0661654	0.0731753	0.0464816	0.0603285
ENSG00000119922	IFIT2	NA	-0.048881	0.0660309	-0.0505273
ENSG00000124201	ZNFX1	-0.0750633	-0.100034	-0.012747	-0.119259
ENSG00000124831	LRRFIP1	-0.223907	-0.133596	0.153898	0.118627
ENSG00000125207	PIWIL1	0.0280613	0.022555	0.0435325	0.0352975
ENSG00000134398	ERN2	-0.225352	-0.133512	-0.106249	-0.00120439
ENSG00000135114	OASL	-0.124196	-0.00509076	-0.068883	-0.140922
ENSG00000136231	IGF2BP3	-0.0671553	-0.077016	-0.442072	-0.287793
ENSG00000137628	DDX60	0.12118	0.12488	0.165377	0.118909
ENSG00000137834	SMAD6	-0.0963802	-0.0516574	-0.21436	-0.120723
ENSG00000144045	DQX1	NA	0.0289973	-0.0103207	-0.0759667
ENSG00000159217	IGF2BP1	-0.146559	-0.269348	-0.058156	-0.0322547
ENSG00000165799	RNASE7	0.0395213	-0.210602	-0.0167332	0.0166281
ENSG00000167088	SNRPD1	-1.69551	-1.7663	-1.93833	-1.91733
ENSG00000172172	MRPL13	NA	-0.149452	-0.62554	-0.649754
ENSG00000174371	EXO1	0.0733504	0.0303866	-0.0872768	-0.092419
ENSG00000175792	RUVBL1	-1.49702	-1.27917	-1.84339	-1.72333
ENSG00000180992	MRPL14	NA	NA	-0.690661	-0.794531
ENSG00000181381	DDX60L	0.0686426	-0.0538028	0.0495389	0.135543
ENSG00000182117	NOP10	NA	0.0130837	-1.2745	-1.20609
ENSG00000182545	RNASE10	-0.0649924	-0.127985	-0.0415016	-0.0337327
ENSG00000184735	DDX53	-0.0399546	0.00834048	-0.098156	0.017332
ENSG00000196141	SPATS2L	-0.0390909	0.115694	0.0863906	0.140285
ENSG00000214274	ANG	-0.474713	-0.212993	-0.0898992	-0.147396
ENSG00000242372	EIF6	-0.644812	-0.781566	-1.04614	-1.10922
