# Supplementary material for: RNA Binding Proteins as Drivers and Therapeutic Target Candidates in Pancreatic Ductal Adenocarcinoma
Source: Int J Mol Sci. 2020 Jun 11;21(11):4190. doi: 10.3390/ijms21114190 (PMC7312628; doi:10.3390/ijms21114190)
Supplement: Supplementary file 1 [file ijms-21-04190-s001.zip › S8.xlsx]

## Sheet: Tabelle1
RBP	miRNA
AIMP2	hsa-mir-29c
ANG	hsa-mir-144
ANG	hsa-mir-744
BRCA1	hsa-mir-125a
BRCA1	hsa-mir-216b
BRCA1	hsa-mir-664a
BZW1	hsa-mir-126
BZW1	hsa-mir-26b
BZW1	hsa-mir-340
BZW1	hsa-mir-129-1
BZW1	hsa-mir-129-2
BZW1	hsa-mir-7-2
BZW1	hsa-mir-885
BZW1	hsa-mir-15a
BZW1	hsa-let-7g
BZW1	hsa-mir-548b
BZW1	hsa-mir-7-1
BZW1	hsa-mir-98
BZW1	hsa-mir-202
BZW1	hsa-mir-320a
DDX6	hsa-mir-3613
DDX6	hsa-mir-423
DDX6	hsa-mir-19a
DDX6	hsa-mir-592
DDX6	hsa-mir-32
DDX6	hsa-mir-454
DDX6	hsa-mir-135b
DDX6	hsa-mir-30c-1
DDX6	hsa-mir-301a
DDX60	hsa-mir-340
DDX60	hsa-mir-664a
DDX60	hsa-mir-2113
ERN2	hsa-mir-342
EXO1	hsa-mir-10b
EXO1	hsa-mir-340
EXO1	hsa-mir-889
EXO1	hsa-mir-137
EXO1	hsa-mir-381
EXO1	hsa-mir-136
EXO1	hsa-mir-103a-2
GAPDH	hsa-mir-150
IFIT3	hsa-mir-876
IFIT3	hsa-mir-3662
IGF2BP1	hsa-mir-330
IGF2BP1	hsa-mir-129-1
IGF2BP1	hsa-mir-410
IGF2BP1	hsa-mir-1179
IGF2BP1	hsa-mir-885
IGF2BP1	hsa-mir-324
IGF2BP1	hsa-mir-98
IGF2BP1	hsa-mir-491
IGF2BP1	hsa-mir-204
IGF2BP1	hsa-mir-495
IGF2BP1	hsa-mir-4727
IGF2BP2	hsa-mir-375
IGF2BP2	hsa-mir-186
IGF2BP2	hsa-let-7c
IGF2BP2	hsa-mir-15a
IGF2BP2	hsa-mir-187
IGF2BP2	hsa-mir-125a
IGF2BP2	hsa-mir-98
IGF2BP2	hsa-mir-485
IGF2BP2	hsa-mir-5010
IGF2BP2	hsa-mir-656
IGF2BP3	hsa-mir-3613
IGF2BP3	hsa-mir-590
IGF2BP3	hsa-mir-3065
IGF2BP3	hsa-mir-32
IGF2BP3	hsa-mir-340
IGF2BP3	hsa-mir-7-2
IGF2BP3	hsa-let-7g
IGF2BP3	hsa-mir-876
IGF2BP3	hsa-mir-5706
IGF2BP3	hsa-mir-548b
IGF2BP3	hsa-mir-7-1
IGF2BP3	hsa-mir-98
IGF2BP3	hsa-mir-491
IGF2BP3	hsa-mir-544a
IGF2BP3	hsa-mir-133b
IGF2BP3	hsa-mir-4760
LRRFIP1	hsa-mir-19a
LRRFIP1	hsa-mir-590
LRRFIP1	hsa-mir-30e
LRRFIP1	hsa-mir-340
LRRFIP1	hsa-mir-7-2
LRRFIP1	hsa-mir-7-1
LRRFIP1	hsa-mir-369
MRPL13	hsa-mir-218-2
MRPL13	hsa-mir-543
NOP10	hsa-mir-342
NOP10	hsa-mir-211
NOP10	hsa-mir-204
OAS1	hsa-mir-126
OAS2	hsa-mir-381
OASL	hsa-mir-490
OASL	hsa-mir-148a
PARP4	hsa-mir-137
PARP4	hsa-mir-548b
PIWIL1	hsa-mir-590
PIWIL1	hsa-mir-154
PRDX1	hsa-mir-655
PTBP3	hsa-mir-3613
PTBP3	hsa-mir-130a
PTBP3	hsa-mir-30e
PTBP3	hsa-mir-338
PTBP3	hsa-mir-340
PTBP3	hsa-mir-500a
PTBP3	hsa-mir-627
PTBP3	hsa-mir-186
PTBP3	hsa-mir-889
PTBP3	hsa-let-7g
PTBP3	hsa-mir-670
PTBP3	hsa-mir-494
PTBP3	hsa-mir-1323
PTBP3	hsa-mir-29c
PTBP3	hsa-mir-548b
PTBP3	hsa-mir-4780
PTBP3	hsa-mir-485
PTBP3	hsa-mir-30b
PTBP3	hsa-mir-148a
PTBP3	hsa-mir-2113
PTBP3	hsa-mir-488
PTBP3	hsa-mir-4460
PTBP3	hsa-mir-499a
RBM34	hsa-mir-495
RBMS1	hsa-mir-3613
RBMS1	hsa-mir-19a
RBMS1	hsa-mir-383
RBMS1	hsa-mir-590
RBMS1	hsa-mir-32
RBMS1	hsa-mir-548v
RBMS1	hsa-mir-628
RBMS1	hsa-mir-183
RBMS1	hsa-mir-577
RBMS1	hsa-mir-335
RBMS1	hsa-let-7g
RBMS1	hsa-mir-548b
RBMS1	hsa-mir-376b
RBMS1	hsa-mir-513b
RBMS1	hsa-mir-2113
RBMS1	hsa-mir-3120
RBMS2	hsa-let-7g
RBMS2	hsa-mir-664a
RUVBL1	hsa-mir-330
RUVBL1	hsa-mir-370
SMAD6	hsa-mir-330
SMAD6	hsa-mir-410
SMAD6	hsa-mir-889
SMAD6	hsa-mir-3187
SMAD6	hsa-mir-134
SMAD6	hsa-mir-369
SMAD6	hsa-mir-3927
SNRPD1	hsa-mir-186
SNRPD1	hsa-mir-7-1
SNRPD1	hsa-mir-495
SPATS2L	hsa-mir-126
SPATS2L	hsa-mir-1269a
SPATS2L	hsa-mir-885
SPATS2L	hsa-mir-187
ZNFX1	hsa-mir-26b
ZNFX1	hsa-mir-520f
ZNFX1	hsa-mir-495
ZNFX1	hsa-mir-1296
ZNFX1	hsa-mir-301a
ZNFX1	hsa-mir-4796
